# Supplementary material for: COBRA improves the quality of viral genomes assembled from metagenomes
Source: Research Square preprint supplement (doi:10.21203/rs.3.rs-3027203/v1), 2023-06-15
Supplement: Supplementary file 1 [file ae2aba2f1d2ecaa6c0787fae.xlsx]

## Sheet: ST1
Supplementary Table 1 | The simulated cases to demonstrate the basis for joining contigs after assembly. The paried-short reads were in selico sequenced (100 bp in length) from the simulated genomes with different types of features, including intra-genome repeats (with or without DTRs), inter-genome shared region, within-population variation. Those in red are cases without expected overlap length…
Intra-genome repeats without DTR (maxK = 100 for IDBA_UD, 99 for metaSPAdes and MEGAHIT)	Corresponding Figure	Description	Repeat length		Repeat times and distance		Results															Within-population variations	Corresponding Figure	Remark
			> max K	≤ max K	twice	triple	metaSPAdes	IDBA_UD	MEGAHIT
	Supplementary Fig. 1	two distant repeats		☓	☓, distant		one contig - full length	one contig - full length	one contig - full length
		three distant repeats		☓		☓, distant	one contig - full length	one contig - full length	four contigs, end overlap length = 99 bp / 73 bp
		two consecutive repeats		☓	☓, consecutive		one contig - full length	one contig - full length	one contig - repeat part only once
		three consecutive repeats		☓		☓, consecutive	one contig - full length	four contigs, end overlap length = 99 bp / 32 bp	one contig - repeat part only once
	Supplementary Fig. 2	two distant repeats	☓		☓, distant		one contig - full length	four contigs, end overlap length = 99 bp	four contigs, end overlap length = 99 bp
		three distant repeats	☓			☓, distant	five contigs, end overlap length = 99 bp	five contigs, end overlap length = 99 bp	five contigs, end overlap length = 99 bp
		two consecutive repeats	☓		☓, consecutive		one contig - full length	one contig - repeat part only once	one contig - repeat part only once
		three consecutive repeats	☓			☓, consecutive	two contigs, no end overlap	four contigs, end overlap length = 99 bp or nothing	one contig - repeat part only once
Intra-genome repeats with DTR (maxK = 100 for IDBA_UD, 99 for metaSPAdes and MEGAHIT)	Corresponding Figure	Description	DRT length		Repeat length		Results
			> maxK	≤ max K	> maxK	≤ max K	metaSPAdes	IDBA_UD	MEGAHIT
	NA	Short DTR (30 bp) + long repeat (130 bp)		☓	☓		one contig - full length, no end overlap	4 contigs, end overlap length = 99 bp / 68 bp	4 contigs, end overlap length = 99 bp / 68 bp
		Short DTR (30 bp) + short repeat (50 bp)		☓		☓	one contig - full length, no end overlap	one contig - full length, no end overlap	one contig - full length, no end overlap
	NA	Long DTR (200 bp) + long repeat (130 bp)	☓		☓		one contig - full length, end overlap length = 99 bp	3 contigs, end overlap length = 99 bp / 68 bp	3 contigs, end overlap length = 99 bp
		Long DTR (200 bp) + short repeat (51 bp)	☓			☓	one contig - full length, end overlap length = 99 bp	one contig - full length, end overlap length = 99 bp	one contig - full length, end overlap length = 59 bp
		Long DTR (200 bp) + short repeat (19 bp)	☓			☓	one contig - full length, end overlap length = 99 bp	one contig - full length, end overlap length = 39 bp	one contig - full length, end overlap length = 21 bp
Inter-genome shared region (maxK = 100 for IDBA_UD, 99 for metaSPAdes and MEGAHIT)	Corresponding Figure	Description	Region Length		Coverage		Results
			> maxK	≤ max K	Genome 1	Genome 2	metaSPAdes	IDBA_UD	MEGAHIT
	Supplementary Fig. 3, upper panel	two genomes with different coverage	☓		10X	30X	genome 1 (two contigs without the shared region), no end overlap + genome 2 (full length)	genome 1 (two contigs) + genome 2 (two contigs) + shared region ( ~ 40X coverage), end overlap length = 99 bp	genome 1 (two contigs) + genome 2 (two contigs) + shared region ( ~ 40X coverage), end overlap length = 99 bp
	Supplementary Fig. 3, bottom panel	two genomes with similar coverage	☓		20X	20X	genome 1 (full length) + genome 2 (full length)	genome 1 (two contigs) + genome 2 (two contigs) + shared region ( ~ 40X coverage), end overlap length = 99 bp	genome 1 (two contigs) + genome 2 (two contigs) + shared region ( ~ 40X coverage), end overlap length = 99 bp
Within-population variation (maxK = 100 for IDBA_UD, 99 for metaSPAdes and MEGAHIT)	Corresponding Figure	Description	Region Length		Coverage		Results
			> maxK	≤ max K			metaSPAdes	IDBA_UD	MEGAHIT
Two subpopulations	Supplementary Fig. 4a	Two subpopulations with the variation region shorter than max K		☓	a: 50X, b: 50X		one contig, either a or b	one contig, either a or b	one contig, either a or b
					a: 60X, b: 40X
					a: 70X, b: 30X
					a: 80X, b: 20X
					a: 90X, b: 10X
					a: 180X, b: 20X
Two subpopulations	Supplementary Fig. 4b	Two subpopulations with the variation region longer than max K	☓		a: 50X, b: 50X		four contigs, end overlap legnth = 99 bp	four contigs, end overlap legnth = 99 bp	four contigs, end overlap legnth = 99 bp
					a: 60X, b: 40X		four contigs, end overlap legnth = 99 bp	four contigs, end overlap legnth = 99 bp	four contigs, end overlap legnth = 99 bp
					a: 70X, b: 30X		one contig, full length of a	four contigs, end overlap legnth = 99 bp	four contigs, end overlap legnth = 99 bp
					a: 80X, b: 20X		one contig, full length of a	four contigs, end overlap legnth = 99 bp	four contigs, end overlap legnth = 99 bp
					a: 90X, b: 10X		two contigs, one is full length of a, other is variation region of b	four contigs, end overlap legnth = 99 bp	two contigs, one is full length of a, other is variation region of b
					a: 180X, b: 20X		one contig, full length of a	four contigs, end overlap legnth = 99 bp	two contigs, one is full length of a, other is variation region of b
Three subpopulations	Supplementary Fig. 5a	Three subpopulations with the variation regions longer than max K, the variation regions start at the same position and end at the same position	☓		a: 50X, b: 50X, c: 50X		five contigs, end overlap legnth = 99 bp	five contigs, end overlap legnth = 99 bp	five contigs, end overlap legnth = 99 bp
					a: 50X, b: 25X, c: 25X		one contig, full length of a	five contigs, end overlap legnth = 99 bp	five contigs, end overlap legnth = 99 bp
					a: 60X, b: 20X, c: 20X		one contig, full length of a	five contigs, end overlap legnth = 99 bp	five contigs, end overlap legnth = 99 bp
					a: 70X, b: 15X, c:15X		one contig, full length of a	five contigs, end overlap legnth = 99 bp	five contigs, end overlap legnth = 99 bp
					a: 80X, b: 10X, c: 10X		three contigs, one is full length of a, the other two are the variation regions of b and c	five contigs, end overlap legnth = 99 bp	three contigs, one is full length of a, the other two are the variation regions of b and c
					a: 180X, b: 10X, c: 10X		three contigs, one is full length of a, the other two are the variation regions of b and c	five contigs, end overlap legnth = 99 bp	three contigs, one is full length of a, the other two are the variation regions of b and c
Three subpopulations	Supplementary Fig. 5b	Three subpopulations with the variation regions longer than max K, the variation regions start at the different positions and end at the same position	☓		a: 50X, b: 50X, c: 50X		six contigs, end overlap legnth = 99 bp	six contigs, end overlap legnth = 99 bp	six contigs, end overlap legnth = 99 bp
					a: 25X, b: 25X, c: 50X		six contigs, end overlap legnth = 99 bp	six contigs, end overlap legnth = 99 bp	six contigs, end overlap legnth = 99 bp
					a: 10X, b: 10X, c: 80X		six contigs, end overlap legnth = 99 bp	six contigs, end overlap legnth = 99 bp	five contigs, end overlap legnth = 99 bp
					a: 10X, b: 10X, c: 180X		five contigs, end overlap legnth = 99 bp	six contigs, end overlap legnth = 99 bp	four contigs, end overlap legnth = 99 bp
					a: 80X, b: 10X, c: 10X		three contigs, one is full length of a, the other two are the variation regions of b and c	six contigs, end overlap legnth = 99 bp	three contigs, one is full length of a, the other two are the variation regions of b and c
					a: 180X, b: 10X, c: 10X		three contigs, one is full length of a, the other two are the variation regions of b and c	six contigs, end overlap legnth = 99 bp	three contigs, one is full length of a, the other two are the variation regions of b and c
Three subpopulations	Supplementary Fig. 5c	Three subpopulations with the variation regions longer than max K, the variation regions start at different positions and end at different positions, situation 1	☓		a: 50X, b: 50X, c: 50X		seven contigs, end overlap length = 99 bp	seven contigs, end overlap length = 99 bp	six contigs, end overlap legnth = 99 bp
					a: 50X, b: 25X, c: 25X		one contig, full length of a	seven contigs, end overlap length = 99 bp	six contigs, end overlap legnth = 99 bp
					a: 25X, b: 25X, c: 50X		six contigs, end overlap legnth = 99 bp	seven contigs, end overlap length = 99 bp	five contigs, end overlap legnth = 99 bp
					a: 20X, b: 20X, c: 60X		seven contigs, end overlap length = 99 bp	seven contigs, end overlap length = 99 bp	six contigs, end overlap legnth = 99 bp
					a: 15X, b: 15X, c: 70X		six contigs, end overlap legnth = 99 bp	seven contigs, end overlap length = 99 bp	six contigs, end overlap legnth = 99 bp
					a: 10X, b: 10X, c: 80X		seven contigs, end overlap length = 99 bp	seven contigs, end overlap length = 99 bp	six contigs, end overlap legnth = 99 bp
					a: 20X, b: 20X, c: 160X		six contigs, end overlap legnth = 99 bp	seven contigs, end overlap length = 99 bp	four contigs, one is full length of c, the others with end overlap legnth = 99 bp
Three subpopulations	Supplementary Fig. 5d	Three subpopulations with the variation regions longer than max K, the variation regions start at different positions and end at different positions, situation 2	☓		a: 50X, b: 50X, c: 50X		seven contigs, end overlap length = 99 bp	seven contigs, end overlap length = 99 bp	seven contigs, end overlap length = 99 bp
					a: 25X, b: 25X, c: 50X		seven contigs, end overlap length = 99 bp	seven contigs, end overlap length = 99 bp	seven contigs, end overlap length = 99 bp
					a: 10X, b: 10X, c: 80X		seven contigs, end overlap length = 99 bp	seven contigs, end overlap length = 99 bp	three contigs, one is full length of c, the other two are the variation regions of a and b
					a: 10X, b: 10X, c: 180X		four contigs, one is full length of c, the others with end overlap length = 99 bp	seven contigs, end overlap length = 99 bp	four contigs, one is full length of c, the others with end overlap legnth = 99 bp
					a: 80X, b: 10X, c: 10X		six contigs, end overlap legnth = 99 bp	seven contigs, end overlap length = 99 bp	four contigs, one is full length of a, the others with end overlap legnth = 99 bp
					a: 160X, b: 20X, c: 20X		seven contigs, end overlap length = 99 bp	seven contigs, end overlap length = 99 bp	six contigs, end overlap legnth = 99 bp
					a: 360X, b: 20X, c: 20X		five contigs, end overlap legnth = 99 bp	seven contigs, end overlap length = 99 bp	four contigs, one is full length of a, the others with end overlap legnth = 99 bp

## Sheet: ST2
Supplementary Table 2 | The number of contigs and COBRA sequences of the ocean virome sample.
COBRA category	COBRA status	metaSPAdes	IDBA_UD	MEGAHIT
i	Self circular	31	74	79
ii-a	Extended_circular	100	120	131
ii-a (unique)	Extended_circular	69	82	87
ii-b	Extended_partial	871	1088	1100
ii-b (unique)	Extended_partial	708	889	941
ii-c	Extended_failed	175	245	315
iii	Orphan_end	1200	777	696
	total	2377	2304	2321
i	Self circular	0.0130416	0.0321181	0.0340371
ii-a	Extended_circular	0.0420698	0.0520833	0.0564412
ii-b	Extended_partial	0.366428	0.472222	0.473934
ii-c	Extended_failed	0.0736222	0.106337	0.135717
iii	Orphan_end	0.504838	0.33724	0.299871
	total - category ii	399	409	469
ii-a	Extended_circular	0.120301	0.129584	0.130064
ii-b	Extended_partial	0.726817	0.706601	0.673774
ii-c	Extended_failed	0.152882	0.163814	0.196162

## Sheet: ST3
Supplementary Table 3 | The information of 231 published freshwater metagenomes. All the information for each is provided when available in the original publications.
Environment	Continent	Metagenomic_sample	Sample name	Latitude and longitude	Collection date	Fraction	Depth (m)	Bioproject	SRR	Reference	Assembler	Mink	MaxK
Lake	Asia	Baikal	Baikal1250-winter	51.787400 N 104.939100 E	﻿29 March 2018	﻿0.22 μm	1250	﻿PRJNA521725	﻿SRR8561390	﻿Cabello-Yeves PJ et al. 2019	megahit	21	141
Lake	Asia	Baikal	Baikal5-summer	51.787400 N 104.939100 E	﻿July 2018	﻿0.22 μm	5	﻿PRJNA615165	SRR12053443	﻿Coutinho et al. 2020	megahit	21	141
Lake	Asia	Baikal	Baikal20-summer	51.787400 N 104.939100 E	﻿July 2018	﻿0.22 μm	20	﻿PRJNA615165	SRR12053442	﻿Coutinho et al. 2020	megahit	21	141
Lake	Asia	Baikal	Baikal300-summer	51.787400 N 104.939100 E	﻿July 2018	﻿0.22 μm	300	﻿PRJNA615165	SRR12053439	﻿Coutinho et al. 2020	megahit	21	141
Lake	Asia	Baikal	Baikal390-summer	51.787400 N 104.939100 E	﻿July 2018	﻿0.22 μm	390	﻿PRJNA615165	SRR12053438	﻿Coutinho et al. 2020	megahit	21	141
Lake	Asia	Baikal	Baikal1250-summer	51.787400 N 104.939100 E	﻿July 2018	﻿0.22 μm	1250	﻿PRJNA615165	SRR12053441	﻿Coutinho et al. 2020	megahit	21	141
Lake	Asia	Baikal	Baikal1350-summer	51.787400 N 104.939100 E	﻿July 2018	﻿0.22 μm	1350	﻿PRJNA615165	SRR12053440	﻿Coutinho et al. 2020	megahit	21	141
Lake	Europe	Lake_Rotsee	ERR3687821				2	PRJEB35558	ERR3687821	﻿Mayr et al., 2020	idba	20	140
Lake	Europe	Lake_Rotsee	ERR3687822				6.1	PRJEB35558	ERR3687822	﻿Mayr et al., 2020	idba	20	140
Lake	Europe	Lake_Rotsee	ERR3687823				10	PRJEB35558	ERR3687823	﻿Mayr et al., 2020	idba	20	140
Lake	Europe	Lake_Rotsee	ERR3687824				4	PRJEB35558	ERR3687824	﻿Mayr et al., 2020	idba	20	140
Lake	Europe	Lake_Rotsee	ERR3687825				13	PRJEB35558	ERR3687825	﻿Mayr et al., 2020	idba	20	140
Lake	Europe	Lake_Rotsee	ERR3687826				4	PRJEB35558	ERR3687826	﻿Mayr et al., 2020	idba	20	140
Lake	Europe	Lake_Rotsee	ERR3687827				13.5	PRJEB35558	ERR3687827	﻿Mayr et al., 2020	idba	20	140
Lake	Europe	Lake_Rotsee	ERR3687828				4	PRJEB35558	ERR3687828	﻿Mayr et al., 2020	idba	20	140
Lake	Europe	Lake_Rotsee	ERR3687829				15	PRJEB35558	ERR3687829	﻿Mayr et al., 2020	idba	20	140
Lake	Europe	Lake_Rotsee	ERR3687830				15	PRJEB35558	ERR3687830	﻿Mayr et al., 2020	idba	20	140
Lake	Asia, South Korea	Soyang	ERR2814725				NA	PRJEB15535	ERR2814725	﻿Moon et al., 2020	metaSPAdes	21	127
Lake	Asia, South Korea	Soyang	ERR2814726				NA	PRJEB15535	ERR2814726	﻿Moon et al., 2020	metaSPAdes	21	127
Lake	Asia, South Korea	Soyang	ERR2814750				NA	PRJEB15535	ERR2814750	﻿Moon et al., 2020	metaSPAdes	21	127
Lake	Asia, South Korea	Soyang	ERR2814751				NA	PRJEB15535	ERR2814751	﻿Moon et al., 2020	metaSPAdes	21	127
Lake	Asia, South Korea	Soyang	ERR2814752				NA	PRJEB15535	ERR2814752	﻿Moon et al., 2020	metaSPAdes	21	127
Lake	Asia, South Korea	Soyang	ERR2814753				NA	PRJEB15535	ERR2814753	﻿Moon et al., 2020	metaSPAdes	21	127
Lake	Europe	Lough_Neagh	1pW	54.618333 N 6.395278 W	04-Mar-14	small	NA	PRJNA350258	SRR4447083	Arkhipova et al. 2017, ISME J	idba	20	140
Lake	Europe	Lough_Neagh	2pW	54.618333 N 6.395278 W	01-Apr-14	small	NA	PRJNA350258	SRR4449190	Arkhipova et al. 2017, ISME J	idba	20	140
Lake	Europe	Lough_Neagh	3pW	54.618333 N 6.395278 W	14-Apr-14	small	NA	PRJNA350258	SRR4449206	Arkhipova et al. 2017, ISME J	idba	20	140
Lake	Europe	Lough_Neagh	4pW	54.618333 N 6.395278 W	28-Apr-14	small	NA	PRJNA292054	SRR2147000	Arkhipova et al. 2017, ISME J	idba	20	140
Lake	Europe	Lough_Neagh	5pW	54.618333 N 6.395278 W	27-May-14	small	NA	PRJNA350258	SRR4449214	Arkhipova et al. 2017, ISME J	idba	20	140
Lake	Europe	Lough_Neagh	6pW	54.618333 N 6.395278 W	23-Jun-2014	small	NA	PRJNA350258	SRR4449225	Arkhipova et al. 2017, ISME J	idba	20	140
Lake	Europe	Lough_Neagh	7pW	54.618333 N 6.395278 W	04-Aug-2014	small	NA	PRJNA350258	SRR4449240	Arkhipova et al. 2017, ISME J	idba	20	140
Lake	Europe	Lough_Neagh	10pW	54.618333 N 6.395278 W	10-Nov-2014	small	NA	PRJNA350258	SRR4449256	Arkhipova et al. 2017, ISME J	idba	20	140
Lake	Europe	Lough_Neagh	11pW	54.618333 N 6.395278 W	20-Jan-2015	small	NA	PRJNA350258	SRR4449268	Arkhipova et al. 2017, ISME J	idba	20	140
Lake	North America, Canada	B1_2	ERS4600317	NA	2014-08-05		0.15	PRJEB38681	ERS4600317	Buck et al. 2020	idba	20	140
Lake	Europe, Finland	Alinen_Mustajärvi	ERS4600318	61.2 N 25.1 E	2014-09-05		1	PRJEB38681	ERS4600318	Buck et al. 2020	idba	20	140
Lake	Europe, Finland	Alinen_Mustajärvi	ERS4600319	61.2 N 25.1 E	2014-09-05		2.35	PRJEB38681	ERS4600319	Buck et al. 2020	idba	20	140
Lake	Europe, Finland	Alinen_Mustajärvi	ERS4600320	61.2 N 25.1 E	2014-09-05		3	PRJEB38681	ERS4600320	Buck et al. 2020	idba	20	140
Lake	Europe, Finland	Alinen_Mustajärvi	ERS4600321	61.2 N 25.1 E	2014-09-05		3.7	PRJEB38681	ERS4600321	Buck et al. 2020	idba	20	140
Lake	Europe, Finland	Alinen_Mustajärvi	ERS4600322	61.2 N 25.1 E	2014-09-05		4.4	PRJEB38681	ERS4600322	Buck et al. 2020	idba	20	140
Lake	Europe, Finland	Alinen_Mustajärvi	ERS4600323	61.2 N 25.1 E	2014-09-05		5.1	PRJEB38681	ERS4600323	Buck et al. 2020	idba	20	140
Lake	Europe, Finland	Alinen_Mustajärvi	ERS4600324	61.2 N 25.1 E	2014-09-05		5.8	PRJEB38681	ERS4600324	Buck et al. 2020	idba	20	140
Lake	Europe, Finland	Alinen_Mustajärvi	ERS4600325	61.2 N 25.1 E	2014-09-05		6.3	PRJEB38681	ERS4600325	Buck et al. 2020	idba	20	140
Lake	Europe, Finland	Alinen_Mustajärvi	ERS4600326	61.2 N 25.1 E	2018-08-22		6	PRJEB38681	ERS4600326	Buck et al. 2020	idba	20	140
Lake	Europe, Finland	Alinen_Mustajärvi	ERS4600327	61.2 N 25.1 E	2018-08-22		1	PRJEB38681	ERS4600327	Buck et al. 2020	idba	20	140
Lake	Europe, Finland	Alinen_Mustajärvi	ERS4600328	61.2 N 25.1 E	2018-08-22		2	PRJEB38681	ERS4600328	Buck et al. 2020	idba	20	140
Lake	Europe, Finland	Alinen_Mustajärvi	ERS4600329	61.2 N 25.1 E	2018-08-22		2.3	PRJEB38681	ERS4600329	Buck et al. 2020	idba	20	140
Lake	Europe, Finland	Alinen_Mustajärvi	ERS4600330	61.2 N 25.1 E	2018-08-22		3	PRJEB38681	ERS4600330	Buck et al. 2020	idba	20	140
Lake	Europe, Finland	Alinen_Mustajärvi	ERS4600331	61.2 N 25.1 E	2018-08-22		3.5	PRJEB38681	ERS4600331	Buck et al. 2020	idba	20	140
Lake	Europe, Finland	Alinen_Mustajärvi	ERS4600332	61.2 N 25.1 E	2018-08-22		4	PRJEB38681	ERS4600332	Buck et al. 2020	idba	20	140
Lake	Europe, Finland	Alinen_Mustajärvi	ERS4600333	61.2 N 25.1 E	2018-08-22		4.5	PRJEB38681	ERS4600333	Buck et al. 2020	idba	20	140
Lake	Europe, Finland	Alinen_Mustajärvi	ERS4600334	61.2 N 25.1 E	2018-08-22		5	PRJEB38681	ERS4600334	Buck et al. 2020	idba	20	140
Lake	Europe, Finland	Alinen_Mustajärvi	ERS4600335	61.2 N 25.1 E	2018-08-22		5.5	PRJEB38681	ERS4600335	Buck et al. 2020	idba	20	140
Lake	Europe, Finland	Alinen_Mustajärvi	ERS4600336	61.2 N 25.1 E	2018-08-22		1	PRJEB38681	ERS4600336	Buck et al. 2020	idba	20	140
Lake	Europe, Finland	Alinen_Mustajärvi	ERS4600337	61.2 N 25.1 E	2018-08-22		6	PRJEB38681	ERS4600337	Buck et al. 2020	idba	20	140
Lake	Europe, Finland	Alinen_Mustajärvi	ERS4600338	61.2 N 25.1 E	2018-08-22		2	PRJEB38681	ERS4600338	Buck et al. 2020	idba	20	140
Lake	Europe, Finland	Alinen_Mustajärvi	ERS4600339	61.2 N 25.1 E	2018-08-22		2.3	PRJEB38681	ERS4600339	Buck et al. 2020	idba	20	140
Lake	Europe, Finland	Alinen_Mustajärvi	ERS4600340	61.2 N 25.1 E	2018-08-22		3	PRJEB38681	ERS4600340	Buck et al. 2020	idba	20	140
Lake	Europe, Finland	Alinen_Mustajärvi	ERS4600341	61.2 N 25.1 E	2018-08-22		3.5	PRJEB38681	ERS4600341	Buck et al. 2020	idba	20	140
Lake	Europe, Finland	Mekkojärvi	MJ-2014-D1	61.23 N 25.14 E	2014-09-05		0.2	PRJEB38681	ERS4600504	Buck et al. 2020	idba	20	140
Lake	Europe, Finland	Mekkojärvi	MJ-2014-D2	61.23 N 25.14 E	2014-09-05		0.55	PRJEB38681	ERS4600505	Buck et al. 2020	idba	20	140
Lake	Europe, Finland	Mekkojärvi	MJ-2014-D3	61.23 N 25.14 E	2014-09-05		0.8	PRJEB38681	ERS4600506	Buck et al. 2020	idba	20	140
Lake	Europe, Finland	Mekkojärvi	MJ-2014-D4	61.23 N 25.14 E	2014-09-05		1.3	PRJEB38681	ERS4600507	Buck et al. 2020	idba	20	140
Lake	Europe, Finland	Mekkojärvi	MJ-2014-D5	61.23 N 25.14 E	2014-09-05		2	PRJEB38681	ERS4600508	Buck et al. 2020	idba	20	140
Lake	Europe, Finland	Mekkojärvi	MJ-2014-D6	61.23 N 25.14 E	2014-09-05		2.8	PRJEB38681	ERS4600509	Buck et al. 2020	idba	20	140
Lake	Europe, Finland	Mekkojärvi	MJ-2014-D7	61.23 N 25.14 E	2014-09-05		3.6	PRJEB38681	ERS4600510	Buck et al. 2020	idba	20	140
Lake	Europe, Finland	Mekkojärvi	MJ1	61.23 N 25.14 E	2015-08-11		0.25	PRJEB38681	ERS4600511	Buck et al. 2020	idba	20	140
Lake	Europe, Finland	Mekkojärvi	MJ110516A	61.23 N 25.14 E	2011-05-16		2.5	PRJEB38681	ERS4600512	Buck et al. 2020	idba	20	140
Lake	Europe, Finland	Mekkojärvi	MJ110516B	61.23 N 25.14 E	2011-05-16		2.5	PRJEB38681	ERS4600513	Buck et al. 2020	idba	20	140
Lake	Europe, Finland	Mekkojärvi	MJ110629A	61.23 N 25.14 E	2011-06-29		2.5	PRJEB38681	ERS4600514	Buck et al. 2020	idba	20	140
Lake	Europe, Finland	Mekkojärvi	MJ110629B	61.23 N 25.14 E	2011-06-29		2.5	PRJEB38681	ERS4600515	Buck et al. 2020	idba	20	140
Lake	Europe, Finland	Mekkojärvi	MJ110712A	61.23 N 25.14 E	2011-07-12		2.5	PRJEB38681	ERS4600516	Buck et al. 2020	idba	20	140
Lake	Europe, Finland	Mekkojärvi	MJ110712B	61.23 N 25.14 E	2011-07-12		2.5	PRJEB38681	ERS4600517	Buck et al. 2020	idba	20	140
Lake	Europe, Finland	Mekkojärvi	MJ110802A	61.23 N 25.14 E	2011-08-02		2.5	PRJEB38681	ERS4600518	Buck et al. 2020	idba	20	140
Lake	Europe, Finland	Mekkojärvi	MJ110830A	61.23 N 25.14 E	2011-08-30		2.5	PRJEB38681	ERS4600519	Buck et al. 2020	idba	20	140
Lake	Europe, Finland	Mekkojärvi	MJ110830B	61.23 N 25.14 E	2011-08-30		2.5	PRJEB38681	ERS4600520	Buck et al. 2020	idba	20	140
Lake	Europe, Finland	Mekkojärvi	MJ110927A	61.23 N 25.14 E	2011-09-27		2.5	PRJEB38681	ERS4600521	Buck et al. 2020	idba	20	140
Lake	Europe, Finland	Mekkojärvi	MJ110927B	61.23 N 25.14 E	2011-09-27		2.5	PRJEB38681	ERS4600522	Buck et al. 2020	idba	20	140
Lake	Europe, Finland	Mekkojärvi	MJ111018A	61.23 N 25.14 E	2011-10-18		2.5	PRJEB38681	ERS4600523	Buck et al. 2020	idba	20	140
Lake	Europe, Finland	Mekkojärvi	MJ111018B	61.23 N 25.14 E	2011-10-18		2.5	PRJEB38681	ERS4600524	Buck et al. 2020	idba	20	140
Lake	Europe, Finland	Mekkojärvi	MJ120516A	61.23 N 25.14 E	2012-05-16		2.5	PRJEB38681	ERS4600525	Buck et al. 2020	idba	20	140
Lake	Europe, Finland	Mekkojärvi	MJ120516B	61.23 N 25.14 E	2012-05-16		2.5	PRJEB38681	ERS4600526	Buck et al. 2020	idba	20	140
Lake	Europe, Finland	Mekkojärvi	MJ120531A	61.23 N 25.14 E	2012-05-31		2.5	PRJEB38681	ERS4600527	Buck et al. 2020	idba	20	140
Lake	Europe, Finland	Mekkojärvi	MJ120531B	61.23 N 25.14 E	2012-05-31		2.5	PRJEB38681	ERS4600528	Buck et al. 2020	idba	20	140
Lake	Europe, Finland	Mekkojärvi	MJ120620A	61.23 N 25.14 E	2012-06-20		2.5	PRJEB38681	ERS4600529	Buck et al. 2020	idba	20	140
Lake	Europe, Finland	Mekkojärvi	MJ120620B	61.23 N 25.14 E	2012-06-20		2.5	PRJEB38681	ERS4600530	Buck et al. 2020	idba	20	140
Lake	Europe, Finland	Mekkojärvi	MJ120702A	61.23 N 25.14 E	2012-07-02		2.5	PRJEB38681	ERS4600531	Buck et al. 2020	idba	20	140
Lake	Europe, Finland	Mekkojärvi	MJ120716A	61.23 N 25.14 E	2012-07-16		2.5	PRJEB38681	ERS4600532	Buck et al. 2020	idba	20	140
Lake	Europe, Finland	Mekkojärvi	MJ120716B	61.23 N 25.14 E	2012-07-16		2.5	PRJEB38681	ERS4600533	Buck et al. 2020	idba	20	140
Lake	Europe, Finland	Mekkojärvi	MJ120730A	61.23 N 25.14 E	2012-07-30		2.5	PRJEB38681	ERS4600534	Buck et al. 2020	idba	20	140
Lake	Europe, Finland	Mekkojärvi	MJ120730B	61.23 N 25.14 E	2012-07-30		2.5	PRJEB38681	ERS4600535	Buck et al. 2020	idba	20	140
Lake	Europe, Finland	Mekkojärvi	MJ120813B	61.23 N 25.14 E	2012-08-13		2.5	PRJEB38681	ERS4600536	Buck et al. 2020	idba	20	140
Lake	Europe, Finland	Mekkojärvi	MJ120827A	61.23 N 25.14 E	2012-08-27		2.5	PRJEB38681	ERS4600537	Buck et al. 2020	idba	20	140
Lake	Europe, Finland	Mekkojärvi	MJ120827B	61.23 N 25.14 E	2012-08-27		2.5	PRJEB38681	ERS4600538	Buck et al. 2020	idba	20	140
Lake	Europe, Finland	Mekkojärvi	MJ120924A	61.23 N 25.14 E	2012-09-24		2.5	PRJEB38681	ERS4600539	Buck et al. 2020	idba	20	140
Lake	Europe, Finland	Mekkojärvi	MJ120924B	61.23 N 25.14 E	2012-09-24		2.5	PRJEB38681	ERS4600540	Buck et al. 2020	idba	20	140
Lake	Europe, Finland	Mekkojärvi	MJ130605B	61.23 N 25.14 E	2013-06-05		2.5	PRJEB38681	ERS4600541	Buck et al. 2020	idba	20	140
Lake	Europe, Finland	Mekkojärvi	MJ130617A	61.23 N 25.14 E	2013-06-17		2.5	PRJEB38681	ERS4600542	Buck et al. 2020	idba	20	140
Lake	Europe, Finland	Mekkojärvi	MJ130617B	61.23 N 25.14 E	2013-06-17		2.5	PRJEB38681	ERS4600543	Buck et al. 2020	idba	20	140
Lake	Europe, Finland	Mekkojärvi	MJ130702A	61.23 N 25.14 E	2013-07-02		2.5	PRJEB38681	ERS4600544	Buck et al. 2020	idba	20	140
Lake	Europe, Finland	Mekkojärvi	MJ130702B	61.23 N 25.14 E	2013-07-02		2.5	PRJEB38681	ERS4600545	Buck et al. 2020	idba	20	140
Lake	Europe, Finland	Mekkojärvi	MJ130729A	61.23 N 25.14 E	2013-07-29		2.5	PRJEB38681	ERS4600546	Buck et al. 2020	idba	20	140
Lake	Europe, Finland	Mekkojärvi	MJ130729B	61.23 N 25.14 E	2013-07-29		2.5	PRJEB38681	ERS4600547	Buck et al. 2020	idba	20	140
Lake	Europe, Finland	Mekkojärvi	MJ130820A	61.23 N 25.14 E	2013-08-20		2.5	PRJEB38681	ERS4600548	Buck et al. 2020	idba	20	140
Lake	Europe, Finland	Mekkojärvi	MJ130820B	61.23 N 25.14 E	2013-08-20		2.5	PRJEB38681	ERS4600549	Buck et al. 2020	idba	20	140
Lake	Europe, Finland	Mekkojärvi	MJ130916A	61.23 N 25.14 E	2013-09-16		2.5	PRJEB38681	ERS4600550	Buck et al. 2020	idba	20	140
Lake	Europe, Finland	Mekkojärvi	MJ130916B	61.23 N 25.14 E	2013-09-16		2.5	PRJEB38681	ERS4600551	Buck et al. 2020	idba	20	140
Lake	Europe, Finland	Mekkojärvi	MJ2	61.23 N 25.14 E	2015-08-11		1	PRJEB38681	ERS4600552	Buck et al. 2020	idba	20	140
Lake	Europe, Finland	Mekkojärvi	MJ3	61.23 N 25.14 E	2015-08-11		2	PRJEB38681	ERS4600553	Buck et al. 2020	idba	20	140
Lake	Europe, Finland	Mekkojärvi	MJ4	61.23 N 25.14 E	2015-08-11		3	PRJEB38681	ERS4600554	Buck et al. 2020	idba	20	140
Lake	Europe, Switzerland	Loclat	Loc080925_4_5m	47.02 N 7 E	2008-09-25		4.5	PRJEB38681	ERS4600460	Buck et al. 2020	idba	20	140
Lake	Europe, Switzerland	Loclat	Loc080925_4m	47.02 N 7 E	2008-09-25		4	PRJEB38681	ERS4600461	Buck et al. 2020	idba	20	140
Lake	Europe, Switzerland	Loclat	Loc080925_5_5m	47.02 N 7 E	2008-09-25		5.5	PRJEB38681	ERS4600462	Buck et al. 2020	idba	20	140
Lake	Europe, Switzerland	Loclat	Loc080925_5m	47.02 N 7 E	2008-09-25		5	PRJEB38681	ERS4600463	Buck et al. 2020	idba	20	140
Lake	Europe, Switzerland	Loclat	Loc080925_6m	47.02 N 7 E	2008-09-25		6	PRJEB38681	ERS4600464	Buck et al. 2020	idba	20	140
Lake	Europe, Switzerland	Loclat	Loc080925_7m	47.02 N 7 E	2008-09-25		7	PRJEB38681	ERS4600465	Buck et al. 2020	idba	20	140
Lake	Europe, Switzerland	Loclat	Loc080925_8_8m	47.02 N 7 E	2008-09-25		8.8	PRJEB38681	ERS4600466	Buck et al. 2020	idba	20	140
Lake	Europe, Switzerland	Loclat	Loc080925_8m	47.02 N 7 E	2008-09-25		8	PRJEB38681	ERS4600467	Buck et al. 2020	idba	20	140
Lake	Europe, Switzerland	Loclat	Loc081215_1m	47.02 N 7 E	2008-12-15		1	PRJEB38681	ERS4600468	Buck et al. 2020	idba	20	140
Lake	Europe, Switzerland	Loclat	Loc081215_4m	47.02 N 7 E	2008-12-15		4	PRJEB38681	ERS4600469	Buck et al. 2020	idba	20	140
Lake	Europe, Switzerland	Loclat	Loc081215_5m	47.02 N 7 E	2008-12-15		5	PRJEB38681	ERS4600470	Buck et al. 2020	idba	20	140
Lake	Europe, Switzerland	Loclat	Loc081215_6m	47.02 N 7 E	2008-12-15		6	PRJEB38681	ERS4600471	Buck et al. 2020	idba	20	140
Lake	Europe, Switzerland	Loclat	Loc081215_8m	47.02 N 7 E	2008-12-15		8	PRJEB38681	ERS4600472	Buck et al. 2020	idba	20	140
Lake	Europe, Switzerland	Loclat	Loc081215_9m	47.02 N 7 E	2008-12-15		9	PRJEB38681	ERS4600473	Buck et al. 2020	idba	20	140
Lake	Europe, Switzerland	Loclat	Loc090116_1m	47.02 N 7 E	2009-01-16		1	PRJEB38681	ERS4600474	Buck et al. 2020	idba	20	140
Lake	Europe, Switzerland	Loclat	Loc090116_4m	47.02 N 7 E	2009-01-16		4	PRJEB38681	ERS4600475	Buck et al. 2020	idba	20	140
Lake	Europe, Switzerland	Loclat	Loc090116_7m	47.02 N 7 E	2009-01-16		7	PRJEB38681	ERS4600476	Buck et al. 2020	idba	20	140
Lake	Europe, Switzerland	Loclat	Loc090116_8m	47.02 N 7 E	2009-01-16		8	PRJEB38681	ERS4600477	Buck et al. 2020	idba	20	140
Lake	Europe, Switzerland	Loclat	Loc090116_9m	47.02 N 7 E	2009-01-16		9	PRJEB38681	ERS4600478	Buck et al. 2020	idba	20	140
Lake	Europe, Switzerland	Loclat	Loc090402_1m	47.02 N 7 E	2009-04-02		1	PRJEB38681	ERS4600479	Buck et al. 2020	idba	20	140
Lake	Europe, Switzerland	Loclat	Loc090402_4m	47.02 N 7 E	2009-04-02		4	PRJEB38681	ERS4600480	Buck et al. 2020	idba	20	140
Lake	Europe, Switzerland	Loclat	Loc090402_7m	47.02 N 7 E	2009-04-02		7	PRJEB38681	ERS4600481	Buck et al. 2020	idba	20	140
Lake	Europe, Switzerland	Loclat	Loc090402_8_9m	47.02 N 7 E	2009-04-02		8.9	PRJEB38681	ERS4600482	Buck et al. 2020	idba	20	140
Lake	Europe, Switzerland	Loclat	Loc090402_8m	47.02 N 7 E	2009-04-02		8	PRJEB38681	ERS4600483	Buck et al. 2020	idba	20	140
Lake	Europe, Switzerland	Loclat	Loc090519_1m	47.02 N 7 E	2009-05-19		1	PRJEB38681	ERS4600484	Buck et al. 2020	idba	20	140
Lake	Europe, Switzerland	Loclat	Loc090519_4m	47.02 N 7 E	2009-05-19		4	PRJEB38681	ERS4600485	Buck et al. 2020	idba	20	140
Lake	Europe, Switzerland	Loclat	Loc090519_5m	47.02 N 7 E	2009-05-19		5	PRJEB38681	ERS4600486	Buck et al. 2020	idba	20	140
Lake	Europe, Switzerland	Loclat	Loc090519_6m	47.02 N 7 E	2009-05-19		6	PRJEB38681	ERS4600487	Buck et al. 2020	idba	20	140
Lake	Europe, Switzerland	Loclat	Loc090519_7m	47.02 N 7 E	2009-05-19		7	PRJEB38681	ERS4600488	Buck et al. 2020	idba	20	140
Lake	Europe, Switzerland	Loclat	Loc090519_8_7m	47.02 N 7 E	2009-05-19		8.7	PRJEB38681	ERS4600489	Buck et al. 2020	idba	20	140
Lake	Europe, Switzerland	Loclat	Loc090519_8m	47.02 N 7 E	2009-05-19		8	PRJEB38681	ERS4600490	Buck et al. 2020	idba	20	140
Lake	Europe, Switzerland	Loclat	Loc090721_1m	47.02 N 7 E	2009-07-21		1	PRJEB38681	ERS4600491	Buck et al. 2020	idba	20	140
Lake	Europe, Switzerland	Loclat	Loc090721_4m	47.02 N 7 E	2009-07-21		4	PRJEB38681	ERS4600492	Buck et al. 2020	idba	20	140
Lake	Europe, Switzerland	Loclat	Loc090721_5m	47.02 N 7 E	2009-07-21		5	PRJEB38681	ERS4600493	Buck et al. 2020	idba	20	140
Lake	Europe, Switzerland	Loclat	Loc090721_6m	47.02 N 7 E	2009-07-21		6	PRJEB38681	ERS4600494	Buck et al. 2020	idba	20	140
Lake	Europe, Switzerland	Loclat	Loc090721_7m	47.02 N 7 E	2009-07-21		7	PRJEB38681	ERS4600495	Buck et al. 2020	idba	20	140
Lake	Europe, Switzerland	Loclat	Loc090721_8_6m	47.02 N 7 E	2009-07-21		8.6	PRJEB38681	ERS4600496	Buck et al. 2020	idba	20	140
Lake	Europe, Switzerland	Loclat	Loc090721_8m	47.02 N 7 E	2009-07-21		8	PRJEB38681	ERS4600497	Buck et al. 2020	idba	20	140
Lake	Europe, Switzerland	Loclat	Loc090907_4m	47.02 N 7 E	2009-09-07		4	PRJEB38681	ERS4600499	Buck et al. 2020	idba	20	140
Lake	Europe, Switzerland	Loclat	Loc090907_5m	47.02 N 7 E	2009-09-07		5	PRJEB38681	ERS4600500	Buck et al. 2020	idba	20	140
Lake	Europe, Switzerland	Loclat	Loc090907_6m	47.02 N 7 E	2009-09-07		6	PRJEB38681	ERS4600501	Buck et al. 2020	idba	20	140
Lake	Europe, Switzerland	Loclat	Loc090907_8_6m	47.02 N 7 E	2009-09-07		8.6	PRJEB38681	ERS4600502	Buck et al. 2020	idba	20	140
Lake	Europe, Switzerland	Loclat	Loc090907_8m	47.02 N 7 E	2009-09-07		8	PRJEB38681	ERS4600503	Buck et al. 2020	idba	20	140
Lake	North America, Canada	SAS2A	A1		2014-08-05		0.55	PRJEB38681	ERS4600313	Buck et al. 2020	idba	20	140
Lake	North America, Canada	SAS2A	A2		2014-08-05		0.95	PRJEB38681	ERS4600314	Buck et al. 2020	idba	20	140
Lake	North America, Canada	SAS2A	A3		2014-08-05		1.35	PRJEB38681	ERS4600315	Buck et al. 2020	idba	20	140
Lake	North America, Canada	SAS2A	A4		2014-08-05		2.25	PRJEB38681	ERS4600316	Buck et al. 2020	idba	20	140
Lake	North America, Canada	SAS2B	D1		2014-08-05		0.15	PRJEB38681	ERS4600369	Buck et al. 2020	idba	20	140
Lake	North America, Canada	SAS2B	D2		2014-08-05		0.45	PRJEB38681	ERS4600370	Buck et al. 2020	idba	20	140
Lake	North America, Canada	SAS2B	D3		2014-08-05		1.25	PRJEB38681	ERS4600371	Buck et al. 2020	idba	20	140
Lake	North America, Canada	SAS2B	D4		2014-08-05		2.05	PRJEB38681	ERS4600372	Buck et al. 2020	idba	20	140
Lake	North America, Canada	SAS2C	E1		2014-08-05		0.25	PRJEB38681	ERS4600385	Buck et al. 2020	idba	20	140
Lake	North America, Canada	SAS2C	E2		2014-08-05		0.75	PRJEB38681	ERS4600386	Buck et al. 2020	idba	20	140
Lake	North America, Canada	SAS2C	E3		2014-08-05		1.35	PRJEB38681	ERS4600387	Buck et al. 2020	idba	20	140
Lake	North America, Canada	SAS2C	E4		2014-08-05		1.85	PRJEB38681	ERS4600388	Buck et al. 2020	idba	20	140
Lake	North America, Canada	SAS2D	E5		2014-08-05		2.35	PRJEB38681	ERS4600389	Buck et al. 2020	idba	20	140
Lake	North America, Canada	SAS2D	F1		2014-08-05		0.45	PRJEB38681	ERS4600401	Buck et al. 2020	idba	20	140
Lake	North America, Canada	SAS2D	F3		2014-08-05		1.05	PRJEB38681	ERS4600402	Buck et al. 2020	idba	20	140
Lake	North America, Canada	SAS2D	F4		2014-08-05		1.65	PRJEB38681	ERS4600403	Buck et al. 2020	idba	20	140
Lake	Europe, Sweden	Björntjärnan	ERS4600569		2018-09-10		7	PRJEB38681	ERS4600569	Buck et al. 2020	metaSPAdes	21	127
Lake	Europe, Sweden	Björntjärnan	ERS4600570		2018-09-10		8	PRJEB38681	ERS4600570	Buck et al. 2020	metaSPAdes	21	127
Lake	Europe, Switzerland	Loclat	Loc090907_1m	47.02 N 7 E	2009-09-07		1	PRJEB38681	ERS4600498	Buck et al. 2020	metaSPAdes	21	127
Lake	Europe, Finland	Lovojärvi			2015-09-15		6.5	PRJEB38681	ERS4600453	Buck et al. 2020; Rissanen et al. 2021	idba	20	140
Lake	Europe, Finland	Lovojärvi			2015-09-15		1.75	PRJEB38681	ERS4600454	Buck et al. 2020; Rissanen et al. 2021	idba	20	140
Lake	Europe, Finland	Lovojärvi			2015-09-15		2	PRJEB38681	ERS4600455	Buck et al. 2020; Rissanen et al. 2021	idba	20	140
Lake	Europe, Finland	Lovojärvi			2015-09-15		2.25	PRJEB38681	ERS4600456	Buck et al. 2020; Rissanen et al. 2021	idba	20	140
Lake	Europe, Finland	Lovojärvi			2015-09-15		2.5	PRJEB38681	ERS4600457	Buck et al. 2020; Rissanen et al. 2021	idba	20	140
Lake	Europe, Finland	Lovojärvi			2015-09-15		3	PRJEB38681	ERS4600458	Buck et al. 2020; Rissanen et al. 2021	idba	20	140
Lake	Europe, Finland	Lovojärvi			2015-09-15		3.25	PRJEB38681	ERS4600459	Buck et al. 2020; Rissanen et al. 2021	idba	20	140
Lake	Europe	Tous	Tous12m	39.14 N 0.6499 W	2015-02-20	small	12	PRJNA342151	SRR4198666	Cabello-Yeves et al. 2017	idba	20	140
Lake	Europe	Tous	Tous25m	39.14 N 0.6499 W	2015-02-20	small	25	PRJNA342151	SRR4198832	Cabello-Yeves et al. 2017	idba	20	140
Lake	Europe	Tous	Tous13m	39.14 N 0.6499 W	July, 2015	small	13	PRJNA342151	SRR5338504	Cabello-Yeves et al. 2017	megahit	21	141
Lake	Asia	Baikal	Baikal5m-winter	51.787400 N 104.939100 E	2016-03-14	small	5	PRJNA396997	SRR5896115	Cabello-Yeves PJ et al. 2018	megahit	21	141
Lake	Asia	Baikal	Baikal20m-winter	51.787400 N 104.939100 E	2016-03-14	small	20	PRJNA396997	SRR5896114	Cabello-Yeves PJ et al. 2018	megahit	21	141
Lake	Europe	Rimov_resevoir_hypolimnion	RH-26jul17	48.846367 N 14.487633 E	2017-07-26	small	30	PRJNA429141	SRR6754086	Kavagutti et al., 2019	megahit	21	141
Lake	Europe	Rimov_resevoir_epilimnion	RE-26jul17	48.846367 N 14.487633 E	2017-07-26	small	0.5	PRJNA429141	SRR6754087	Kavagutti et al., 2019	megahit	21	141
Lake	Europe	Rimov_resevoir_hypolimnion	RH-18aug17	48.846367 N 14.487633 E	2017-08-18	small	30	PRJNA429141	SRR6754088	Kavagutti et al., 2019	megahit	21	141
Lake	Europe	Rimov_resevoir_epilimnion	RE-18aug17	48.846367 N 14.487633 E	2017-08-18	small	0.5	PRJNA429141	SRR6754089	Kavagutti et al., 2019	megahit	21	141
Lake	Europe	Rimov_resevoir_hypolimnion	RH-27jun17	48.846367 N 14.487633 E	2017-06-27	small	30	PRJNA429141	SRR6754092	Kavagutti et al., 2019	megahit	21	141
Lake	Europe	Rimov_resevoir_epilimnion	RE-27jun17	48.846367 N 14.487633 E	2017-06-27	small	0.5	PRJNA429141	SRR6754093	Kavagutti et al., 2019	megahit	21	141
Lake	Europe	Rimov_resevoir_hypolimnion	RH-14apr17	48.846367 N 14.487633 E	2017-04-14	small	30	PRJNA429141	SRR6754094	Kavagutti et al., 2019	megahit	21	141
Lake	Europe	Rimov_resevoir_epilimnion	RE-14apr17	48.846367 N 14.487633 E	2017-04-14	small	0.5	PRJNA429141	SRR6754095	Kavagutti et al., 2019	megahit	21	141
Lake	Europe	Rimov_resevoir_hypolimnion	RH-09nov16	48.846367 N 14.487633 E	2016-11-09	small	30	PRJNA429141	SRR6754096	Kavagutti et al., 2019	megahit	21	141
Lake	Europe	Rimov_resevoir_epilimnion	RE-09nov16	48.846367 N 14.487633 E	2016-11-09	small	0.5	PRJNA429141	SRR6754097	Kavagutti et al., 2019	megahit	21	141
Lake	Europe	Rimov_resevoir_hypolimnion	RH-15aug16	48.846367 N 14.487633 E	2016-08-15	small	30	PRJNA429141	SRR6754098	Kavagutti et al., 2019	megahit	21	141
Lake	Europe	Rimov_resevoir_epilimnion	RE-15aug16	48.846367 N 14.487633 E	2016-08-15	small	0.5	PRJNA429141	SRR6754099	Kavagutti et al., 2019	megahit	21	141
Lake	Europe	Rimov_resevoir_hypolimnion	RH-20apr16	48.846367 N 14.487633 E	2016-04-20	small	30	PRJNA429141	SRR6754100	Kavagutti et al., 2019	metaSPAdes	21	127
Lake	Europe	Rimov_resevoir_epilimnion	RE-20apr16	48.846367 N 14.487633 E	2016-04-20	small	0.5	PRJNA429141	SRR6754101	Kavagutti et al., 2019	megahit	21	141
Lake	Europe	Rimov_resevoir_epilimnion	RE-04nov15	48.846367 N 14.487633 E	04-Nov-15	small	0.5	PRJNA429141	SRR6754102	Kavagutti et al., 2019	megahit	21	141
Lake	Europe	Rimov_resevoir_epilimnion	RE-16jun15	48.846367 N 14.487633 E	16-Jun-15	small	0.5	PRJNA429141	SRR6754103	Kavagutti et al., 2019	megahit	21	141
Lake	Europe	Jiricka_pond	Jr-11may16	48.616034 N 14.676594 E	2016-05-11	small	0.5	PRJNA429145	SRR9214414	Kavagutti et al., 2019	megahit	21	141
Lake	Europe	Jiricka_pond	Jr-25may17	48.616034 N 14.676594 E	2017-05-25	small	0.5	PRJNA429145	SRR9214415	Kavagutti et al., 2019	megahit	21	141
Lake	Europe	Jiricka_pond	Jr-28jun17	48.616034 N 14.676594 E	28-Jun-17	small	0.5	PRJNA429145	SRR9214416	Kavagutti et al., 2019	megahit	21	141
Lake	Europe	Jiricka_pond	Jr-07aug17	48.616034 N 14.676594 E	2017-08-07	small	0.5	PRJNA429145	SRR9214417	Kavagutti et al., 2019	megahit	21	141
Lake	Europe	Jiricka_pond	Jr-28aug17	48.616034 N 14.676594 E	2017-08-28	small	0.5	PRJNA429145	SRR9214418	Kavagutti et al., 2019	megahit	21	141
Lake	Europe, Switzerland	Zurich	ZS-13may13-5m	47.18 N 8.34 E	2013-05-13	small	5	PRJNA428721	SRR6475630	Mehrshad M et al.	megahit	21	141
Lake	Europe, Switzerland	Zurich	ZS-13may13-80m	47.18 N 8.34 E	2013-05-13	small	80	PRJNA428721	SRR6475631	Mehrshad M et al.	megahit	21	141
Lake	Europe, Switzerland	Zurich	ZS-13oct10-5m	47.18 N 8.34 E	2010-10-13	small	5	PRJNA428721	SRR6475632	Mehrshad M et al.	megahit	21	141
Lake	Europe, Switzerland	Zurich	ZS-17Mar17-2m	47.18 N 8.34 E	2017-03-17	small	2	PRJNA428721	SRR6475633	Mehrshad M et al.	megahit	21	141
Lake	Europe, Switzerland	Zurich	zurich-hypo	47.18 N 8.34 E	3-Nov-2015	small	40-80	PRJNA428721	SRR7054680	Mehrshad M et al.	megahit	21	141
Lake	Europe, Switzerland	Zurich	zurich-epi	47.18 N 8.34 E	3-Nov-2015	small	5	PRJNA428721	SRR7054681	Mehrshad M et al.	megahit	21	141
Lake	Asia	Lugu	Lake Lugu >0.22micron metagenome 2017-08-12				NA	PRJNA548910	SRR9302957	Shen et al., 2019, Frontiers	megahit	21	141
Lake	Asia	Lugu	Lake Lugu >0.22micron metagenome 2016-05-18				NA	PRJNA548910	SRR9302958	Shen et al., 2019, Frontiers	megahit	21	141
Lake	Asia	Fuxian	Lake Fuxian >0.22micron metagenome 2017-09-24				NA	PRJNA548910	SRR9302959	Shen et al., 2019, Frontiers	megahit	21	141
Lake	Asia	Fuxian	Lake Fuxian 0.22-64micron metagenome 2015-12-10				NA	PRJNA548910	SRR9302960	Shen et al., 2019, Frontiers	megahit	21	141
Lake	Asia	Erhai	Lake Erhai >0.22micron metagenome 2017-07-21				NA	PRJNA548910	SRR9302961	Shen et al., 2019, Frontiers	megahit	21	141
Lake	Asia	Erhai	Lake Erhai >0micron metagenome 2014-06-14				NA	PRJNA548910	SRR9302962	Shen et al., 2019, Frontiers	megahit	21	141
Lake	Asia	Xingyun	Lake Xingyun >0.22micron metagenome 2017-09-24				NA	PRJNA548910	SRR9302963	Shen et al., 2019, Frontiers	megahit	21	141
Lake	Asia	Xingyun	Lake Xingyun >64micron metagenome 2016-06-07				NA	PRJNA548910	SRR9302964	Shen et al., 2019, Frontiers	megahit	21	141
Lake	Asia	Dianchi	Lake Dianchi >0.22micron metagenome 2017-09-25				NA	PRJNA548910	SRR9302965	Shen et al., 2019, Frontiers	megahit	21	141
Lake	Asia	Dianchi	Lake Dianchi >64micron metagenome 2016-06-18				NA	PRJNA548910	SRR9302966	Shen et al., 2019, Frontiers	megahit	21	141
Lake	Asia	Fuxian	F1-20				NA	PRJNA531348	SRR8894380	Xing et al. 2019	megahit	21	141
Lake	Asia	Fuxian	F1-80				NA	PRJNA531348	SRR8894378	Xing et al. 2019	megahit	21	141
Lake	Asia	Fuxian	F1-60				NA	PRJNA531348	SRR8894381	Xing et al. 2019	megahit	21	141
Lake	Asia	Fuxian	F1-120				NA	PRJNA531348	SRR8894379	Xing et al. 2019	megahit	21	141
Lake	Asia	Fuxian	F1-140				NA	PRJNA531348	SRR8894382	Xing et al. 2019	megahit	21	141
Lake	Asia	Biwa	LBG-julE	35.2193 N, 135.9957 E	2016-07-20	small	5	PRJDB6644	DRR125121	Yusuke et al., 2019. EM	idba	20	140
Lake	Asia	Biwa	LBG-augE	35.2193 N, 135.9957 E	2016-08-18	small	5	PRJDB6644	DRR125122	Yusuke et al., 2019. EM	idba	20	140
Lake	Asia	Biwa	LBG-sepE	35.2193 N, 135.9957 E	2016-09-27	small	5	PRJDB6644	DRR125123	Yusuke et al., 2019. EM	idba	20	140
Lake	Asia	Biwa	LBG-sepH	35.2193 N, 135.9957 E	2016-09-13	small	65	PRJDB6644	DRR125124	Yusuke et al., 2019. EM	idba	20	140
Lake	Asia	Biwa	LBG-octH	35.2193 N, 135.9957 E	2016-10-11	small	65	PRJDB6644	DRR125125	Yusuke et al., 2019. EM	idba	20	140
Lake	Asia	Biwa	LBG-novH	35.2193 N, 135.9957 E	2016-11-17	small	65	PRJDB6644	DRR125126	Yusuke et al., 2019. EM	idba	20	140
Lake	Asia	Biwa	LBG-decH	35.2193 N, 135.9957 E	2016-12-12	small	65	PRJDB6644	DRR125127	Yusuke et al., 2019. EM	idba	20	140

## Sheet: ST4
Supplementary Table 4 | Information of species level phage genome clusters.
Cluster_representative	Cluster_members	Num_cluster_members	Length (bp)	Quality	Detected_sites	Num_detected_sites	vpf_taxa	vpf_taxa_confidence_score	vpf_host	vpf_host_confidence_score
SRR9214418_k141_719546_extended_partial	SRR9214418_k141_719546_extended_partial,SRR9214417_k141_1484474_extended_partial	2	712525	high-quality	Jiricka_pond	1	dsDNA,Myoviridae,T4virus	0.9994240858238235,0.9993316487940517,0.9993801003961847	Bacteria,Sphingomonadaceae,Sphingomonas	0.999551679229646,0.9997137107988286,0.999709398780776
ERS4600532_contig-140_0_self_circular	ERS4600532_contig-140_0_self_circular,ERS4600534_contig-140_0_self_circular	2	511370	circular	Mekkojärvi	1	dsDNA,Myoviridae,Bxz1virus	0.9989336479608995,0.9989864390909793,0.9991376507733591	Bacteria,Mycobacteriaceae,Mycobacterium	0.9991680808240262,0.9994601403635055,0.9993992795692163
SRR6754089_k141_3184404_extended_circular	SRR6754089_k141_3184404_extended_circular,SRR6754087_k141_1158622_extended_circular	2	466121	circular	Rimov	1	dsDNA,Myoviridae,T4virus	0.9996370759814363,0.9996547902969276,0.9997988770174289	Bacteria,Enterobacteriaceae,Synechococcus	0.9997253245984451,0.9998404960164903,0.999772290089414
SRR8894380_k141_3930791_extended_partial	SRR8894380_k141_3930791_extended_partial	1	464360	high-quality	Fuxian	1	dsDNA,Myoviridae,T4virus	0.9984796426249355,0.9985639906872196,0.9984488734357867	Bacteria,Sphingomonadaceae,Sphingomonas	0.9985697935988003,0.9990470659446725,0.9990522930387996
SRR9214417_k141_1293051_extended_partial	SRR9214417_k141_1293051_extended_partial	1	461059	high-quality	Jiricka_pond	1	dsDNA,Myoviridae,T4virus	0.9989910992534135,0.9986759079882156,0.9987188741521151	Bacteria,Sphingomonadaceae,Sphingomonas	0.999037057500296,0.9992208843882409,0.9991368710055887
SRR8894379_k141_2274901_extended_circular	SRR8894379_k141_2274901_extended_circular,SRR8894382_k141_255278_extended_circular	2	450400	circular	Fuxian	1	dsDNA,Myoviridae,T4virus	0.9993105844898326,0.9993316487940517,0.9994544883486426	Bacteria,Enterobacteriaceae,Bacillus	0.999452227791152,0.9996237341927463,0.999520724854862
SRR8894378_k141_2979955_self_circular	SRR8894378_k141_2979955_self_circular,SRR8894379_k141_2339924_self_circular,SRR8894382_k141_1879056_self_circular,SRR8894381_k141_2709432_extended_partial	4	421719	circular	Fuxian	1	dsDNA,Myoviridae,Bxz1virus	0.9981755711499226,0.9984568022862655,0.9983221384056733	Bacteria,Mycobacteriaceae,Mycobacterium	0.9983551047791941,0.9988936967297594,0.998935185084784
SRR6754088_k141_1280414_extended_partial	SRR6754088_k141_1280414_extended_partial	1	420178	high-quality	Rimov	1	dsDNA,Myoviridae,Cp220virus	0.9987500840750622,0.9988981662901937,0.9990054055245453	Bacteria,Sphingomonadaceae,Sphingomonas	0.9989423418445874,0.9993844782174817,0.9993689182478047
ERR2814753_NODE_645_length_15945_cov_15.744658_extended_partial	ERR2814753_NODE_645_length_15945_cov_15.744658_extended_partial	1	399633	circular	Soyang	1	dsDNA,Myoviridae,T4virus	0.9976136694841155,0.9970018773733167,0.9967875424975617	Bacteria,Enterobacteriaceae,Mycobacterium	0.9978136469473934,0.9982393214127963,0.9983843439677476
SRR8894381_k141_1590107	SRR8894381_k141_1590107	1	388328	high-quality	Fuxian	1	dsDNA,Myoviridae,Bxz1virus	0.9982778624756182,0.9986238900877527,0.9988263234167765	Bacteria,Mycobacteriaceae,Mycobacterium	0.9985271715537314,0.9991779410080652,0.9991997623142267
ERS4600463_contig-140_2_self_circular	ERS4600461_contig-140_0_extended_circular,ERS4600463_contig-140_2_self_circular,ERS4600460_contig-140_0_self_circular	3	387747	circular	Loclat	1	dsDNA,Myoviridae,Sap6virus	0.9566494966706275,0.9714374437457932,0.9723662532165902	Bacteria,Enterobacteriaceae,Bacillus	0.9693436994356526,0.9835629100070346,0.9847369299932989
ERS4600385_contig-140_0_self_circular	ERS4600385_contig-140_0_self_circular	1	384211	circular	SAS2	1	dsDNA,Myoviridae,T4virus	0.9997029347801717,0.9997194185975028,0.9998457138763838	Bacteria,Enterobacteriaceae,Synechococcus	0.9997600536722049,0.9998670800137419,0.999833012732237
ERS4600401_contig-140_142_extended_partial	ERS4600401_contig-140_142_extended_partial	1	379270	circular	SAS2	1	dsDNA,Myoviridae,T4virus	0.9998206398672735,0.9998281832984708,0.9999090813914404	Bacteria,Enterobacteriaceae,Synechococcus	0.9998200402541537,0.9998977538567245,0.999895904040875
SRR9214415_k141_402180_extended_circular	SRR9214415_k141_402180_extended_circular	1	376636	circular	Jiricka_pond	1	dsDNA,Myoviridae,T4virus	0.9997379660560949,0.9997493682977694,0.9998512240950843	Bacteria,Enterobacteriaceae,Synechococcus	0.9997821539918702,0.9998711698594729,0.9998633740536484
SRR6754088_k141_1780681_extended_partial	SRR6754088_k141_1780681_extended_partial,SRR6754094_k141_3452522_extended_partial,SRR6754086_k141_2812894_extended_partial	3	376592	high-quality	Rimov	1	dsDNA,Myoviridae,T4virus	0.9984796426249355,0.9983259693851011,0.9981871380475091	Bacteria,Enterobacteriaceae,Bacillus	0.9985966297012511,0.9989795834901107,0.9989677150720105
ERS4600313_contig-140_6_extended_circular	ERS4600313_contig-140_6_extended_circular	1	376302	circular	SAS2	1	dsDNA,Myoviridae,T4virus	0.9998052261058673,0.9998250306984428,0.9998787751885873	Bacteria,Enterobacteriaceae,Synechococcus	0.999808990094321,0.9998977538567245,0.9998915667092448
SRR6754094_k141_2043454_extended_partial	SRR6754094_k141_2043454_extended_partial	1	373258	high-quality	Rimov	1	dsDNA,Myoviridae,T4virus	0.997885512185279,0.9981084399831651,0.9979364230966327	Bacteria,Sphingomonadaceae,Sphingomonas	0.9981277872054936,0.9986483059858983,0.9986619331920809
SRR9214414_k141_1058100_self_circular	SRR9214414_k141_1058100_self_circular	1	372243	circular	Jiricka_pond	1	dsDNA,Myoviridae,T4virus	0.9992895657242786,0.9993237672939815,0.9994903047701963	Bacteria,Enterobacteriaceae,Synechococcus	0.9994096057460831,0.9996237341927463,0.9991368710055887
SRR6754086_k141_1663833_extended_partial	SRR6754086_k141_1663833_extended_partial,SRR6754092_k141_2732654,SRR6754098_k141_1721565	3	372145	high-quality	Rimov	1	dsDNA,Myoviridae,T4virus	0.9983927650606461,0.9984757178864339,0.9984488734357867	Bacteria,Enterobacteriaceae,Bacillus	0.9984687635660444,0.9990061674873624,0.9990327750464637
SRR9214418_k141_25334_extended_partial	SRR9214418_k141_25334_extended_partial	1	370438	high-quality	Jiricka_pond	1	dsDNA,Myoviridae,T4virus	0.9998066273569043,0.9998250306984428,0.9998925507353387	Bacteria,Enterobacteriaceae,Synechococcus	0.999808990094321,0.9998977538567245,0.999895904040875
SRR9214415_k141_794410_self_circular	SRR9214415_k141_794410_self_circular,SRR9214416_k141_820719_self_circular,SRR9214418_k141_743093_extended_circular	3	369286	circular	Jiricka_pond	1	dsDNA,Myoviridae,T4virus	0.9998192386162366,0.9998250306984428,0.9998787751885873	Bacteria,Enterobacteriaceae,Synechococcus	0.9998168830656301,0.9998977538567245,0.9998893980434297
ERS4600386_contig-140_0_extended_partial	ERS4600386_contig-140_0_extended_partial	1	368848	high-quality	SAS2	1	dsDNA,Myoviridae,T4virus	0.9997828060892765,0.9998171491983726,0.9998787751885873	Bacteria,Enterobacteriaceae,Synechococcus	0.9998042543115355,0.9998977538567245,0.9998850607117995
SRR8894380_k141_5500204_extended_partial	SRR8894380_k141_5500204_extended_partial	1	367766	circular	Fuxian	1	dsDNA,Myoviridae,Cp220virus	0.9990849830728875,0.9991487979924243,0.999258875584772	Bacteria,Sphingomonadaceae,Sphingomonas	0.999228067405975,0.9995296677409328,0.999518556189047
SRR6754099_k141_1555552_extended_circular	SRR6754099_k141_1555552_extended_circular	1	364984	circular	Rimov	1	dsDNA,Myoviridae,T4virus	0.9997856085913503,0.9998187254983867,0.9998842854072878	Bacteria,Enterobacteriaceae,Synechococcus	0.9998074115000593,0.9998977538567245,0.999895904040875
SRR9214416_k141_578771_extended_circular	SRR9214416_k141_578771_extended_circular	1	364836	circular	Jiricka_pond	1	dsDNA,Myoviridae,T4virus	0.9997968185996458,0.9998250306984428,0.9998870405166381	Bacteria,Enterobacteriaceae,Synechococcus	0.999808990094321,0.9998977538567245,0.999895904040875
ERS4600549_contig-140_0_self_circular	ERS4600549_contig-140_0_self_circular	1	364577	circular	Mekkojärvi	1	dsDNA,Myoviridae,T4virus	0.9996132547138085,0.9996610954969838,0.9997988770174289	Bacteria,Enterobacteriaceae,Synechococcus	0.9997237460041832,0.9998364061707592,0.9997332541047422
SRR9214415_k141_1243722_extended_partial	SRR9214415_k141_1243722_extended_partial,SRR9214417_k141_9142	2	362125	high-quality	Jiricka_pond	1	dsDNA,Myoviridae,Cp220virus	0.9991340268591798,0.9990289991913581,0.9991211201172574	Bacteria,Sphingomonadaceae,Sphingomonas	0.999277003828091,0.9995010388208156,0.999479520204375
SRR9214416_k141_231286_extended_partial	SRR9214416_k141_231286_extended_partial	1	361801	high-quality	Jiricka_pond	1	dsDNA,Myoviridae,T4virus	0.9996693047552855,0.99967528219711,0.9998181627828808	Bacteria,Enterobacteriaceae,Synechococcus	0.999742689135325,0.9998609452451453,0.999811326074086
ERS4600386_contig-140_86_extended_partial	ERS4600386_contig-140_86_extended_partial	1	360699	high-quality	SAS2	1	dsDNA,Myoviridae,T4virus	0.9997127435374302,0.9997477919977553,0.9998512240950843	Bacteria,Enterobacteriaceae,Synechococcus	0.999775839614823,0.9998691249366074,0.9998481933929427
SRR9214415_k141_1271795_extended_partial	SRR9214415_k141_1271795_extended_partial	1	359866	circular	Jiricka_pond	1	dsDNA,Myoviridae,T4virus	0.9993652332802726,0.9993647510943463,0.9995316314104506	Bacteria,Rhodothermaceae,Rhodothermus	0.9994964284304827,0.9997055311073666,0.9996963867858855
ERS4600385_contig-140_88_extended_circular	ERS4600385_contig-140_88_extended_circular,ERS4600386_contig-140_20_extended_circular	2	358815	circular	SAS2	1	dsDNA,Myoviridae,T4virus	0.9998206398672735,0.9998313358984989,0.9998925507353387	Bacteria,Enterobacteriaceae,Synechococcus	0.9998200402541537,0.9998977538567245,0.9999002413725052
SRR9214415_k141_1560300_self_circular	SRR9214415_k141_1560300_self_circular	1	358627	circular	Jiricka_pond	1	dsDNA,Myoviridae,T4virus	0.9997870098423873,0.9998171491983726,0.999856734313785	Bacteria,Enterobacteriaceae,Synechococcus	0.9998074115000593,0.9998936640109936,0.9998850607117995
ERS4600511_contig-140_1158_extended_partial	ERS4600511_contig-140_1158_extended_partial	1	358422	high-quality	Mekkojärvi	1	dsDNA,Myoviridae,T4virus	0.999716947290541,0.9997682838979377,0.9998512240950843	Bacteria,Enterobacteriaceae,Synechococcus	0.9997789968033466,0.9998773046280695,0.9998763860485391
SRR6754100_NODE_27_length_212624_cov_6.109682_extended_circular	SRR6754100_NODE_27_length_212624_cov_6.109682_extended_circular	1	357832	circular	Rimov	1	dsDNA,Myoviridae,T4virus	0.9997982198506827,0.9998250306984428,0.9998925507353387	Bacteria,Enterobacteriaceae,Synechococcus	0.999808990094321,0.9998977538567245,0.999895904040875
ERR2814752_NODE_580_length_19104_cov_54.070138_extended_circular	ERR2814752_NODE_580_length_19104_cov_54.070138_extended_circular	1	357253	circular	Soyang	1	dsDNA,Myoviridae,T4virus	0.9998192386162366,0.9998329121985129,0.9999173467194913	Bacteria,Enterobacteriaceae,Synechococcus	0.9998168830656301,0.99989979877959,0.9999045787041354
ERR3687830_contig-140_32_extended_partial	ERR3687830_contig-140_32_extended_partial	1	356376	high-quality	Lake_Rotsee	1	dsDNA,Myoviridae,T4virus	0.9998276461224581,0.9998360647985409,0.9999173467194913	Bacteria,Enterobacteriaceae,Synechococcus	0.9998342476025099,0.99989979877959,0.9999045787041354
SRR9214417_k141_1575131_extended_partial	SRR9214417_k141_1575131_extended_partial,SRR9214415_k141_313799_extended_partial	2	353441	high-quality	Jiricka_pond	1	dsDNA,Myoviridae,T4virus	0.9993484182678295,0.9993805140944866,0.9995371416291513	Bacteria,Rhodothermaceae,Rhodothermus	0.9994774852993409,0.9997198455674252,0.9997159047782214
SRR9214417_k141_1078526_extended_partial	SRR9214417_k141_1078526_extended_partial	1	352855	high-quality	Jiricka_pond	1	dsDNA,Myoviridae,T4virus	0.9993414120126449,0.9993568695942762,0.9995095905356484	Bacteria,Rhodothermaceae,Rhodothermus	0.9994869568649118,0.9996687224957874,0.9996573508012135
SRR9214416_k141_28200_extended_circular	SRR9214416_k141_28200_extended_circular,SRR9214418_k141_858897_extended_partial	2	352844	circular	Jiricka_pond	1	dsDNA,Myoviridae,T4virus	0.9997814048382396,0.9998139965983446,0.9998649996418358	Bacteria,Enterobacteriaceae,Synechococcus	0.9998042543115355,0.9998977538567245,0.9998893980434297
ERR3687822_contig-140_43_extended_partial	ERR3687822_contig-140_43_extended_partial	1	348870	circular	Lake_Rotsee	1	dsDNA,Myoviridae,T4virus	0.9997575835706118,0.999782470598064,0.999856734313785	Bacteria,Enterobacteriaceae,Synechococcus	0.9997900469631793,0.999891619088128,0.9998828920459844
ERR3687823_contig-140_0_self_circular	ERR3687828_contig-140_2_extended_partial,ERR3687829_contig-140_384_extended_partial,ERR3687823_contig-140_0_self_circular	3	346667	circular	Lake_Rotsee	1	dsDNA,Myoviridae,T4virus	0.999810831110015,0.9998250306984428,0.9999035711727399	Bacteria,Enterobacteriaceae,Synechococcus	0.999808990094321,0.9998977538567245,0.999895904040875
ERS4600369_contig-140_431_extended_partial	ERS4600369_contig-140_431_extended_partial	1	345557	circular	SAS2	1	dsDNA,Myoviridae,T4virus	0.999792614846535,0.9998234543984288,0.9998705098605364	Bacteria,Enterobacteriaceae,Synechococcus	0.999808990094321,0.9998977538567245,0.999895904040875
ERS4600333_contig-140_1	ERS4600333_contig-140_1,ERS4600326_contig-140_3,ERS4600334_contig-140_2	3	344997	circular	Alinen_Mustajärvi	1	dsDNA,Myoviridae,T4virus	0.9993946595520481,0.999460905395202,0.9996335704564114	Bacteria,Rhodothermaceae,Rhodothermus	0.9995390504755515,0.9997586991018699,0.9997679527577839
SRR6754088_k141_2878840_self_circular	SRR6754094_k141_3415297_extended_partial,SRR6754088_k141_2878840_self_circular,SRR6754086_k141_1098690_self_circular,SRR6754092_k141_1093769_self_circular,SRR6754100_NODE_6_length_339699_cov_34.126606_self_circular,SRR6754102_k141_838025_self_circular	6	339509	circular	Rimov	1	dsDNA,Myoviridae,T4virus	0.9997617873237227,0.9998029624982464,0.999856734313785	Bacteria,Enterobacteriaceae,Synechococcus	0.9998010971230119,0.9998977538567245,0.9998893980434297
ERS4600326_contig-140_637_extended_circular	ERS4600335_contig-140_11_extended_partial,ERS4600326_contig-140_637_extended_circular	2	342761	circular	Alinen_Mustajärvi	1	dsDNA,Myoviridae,T4virus	0.9994114745644912,0.9994104637947532,0.9995757131600553	Bacteria,Rhodothermaceae,Rhodothermus	0.9995469434468606,0.9997627889476008,0.9997636154261537
ERR3687830_contig-140_92_extended_circular	ERR3687830_contig-140_92_extended_circular	1	341323	circular	Lake_Rotsee	1	dsDNA,Myoviridae,T4virus	0.9997253547967625,0.9997635549978956,0.9998512240950843	Bacteria,Enterobacteriaceae,Synechococcus	0.9997805753976085,0.9998773046280695,0.9998655427194636
ERR3687828_contig-140_7_extended_partial	ERR3687828_contig-140_7_extended_partial	1	340996	high-quality	Lake_Rotsee	1	dsDNA,Myoviridae,Cp220virus	0.999055556801112,0.9991472216924103,0.9992506102567211	Bacteria,Sphingomonadaceae,Sphingomonas	0.9992122814633568,0.9995173982037397,0.9995033755283412
ERR3687824_contig-140_0_extended_circular	ERR3687824_contig-140_0_extended_circular	1	340005	circular	Lake_Rotsee	1	dsDNA,Myoviridae,T4virus	0.9993133869919064,0.9994057348947111,0.999600509144208	Bacteria,Rhodothermaceae,Rhodothermus	0.999444334819843,0.9997443846418113,0.9997636154261537
SRR9214418_k141_1103865_extended_circular	SRR9214418_k141_1103865_extended_circular	1	338600	circular	Jiricka_pond	1	dsDNA,Myoviridae,T4virus	0.9996608972490639,0.9996926214972643,0.9998319383296324	Bacteria,Enterobacteriaceae,Synechococcus	0.9997442677295868,0.9998629901680108,0.9998221694031615
SRR6754098_k141_1985071	SRR6754098_k141_1985071	1	338380	circular	Rimov	1	dsDNA,Myoviridae,T4virus	0.9997225522946886,0.999782470598064,0.999856734313785	Bacteria,Enterobacteriaceae,Synechococcus	0.9997837325861321,0.9998895741652625,0.9998503620587579
ERS4600319_contig-140_12_extended_circular	ERS4600318_contig-140_114_extended_partial,ERS4600319_contig-140_12_extended_circular	2	337210	circular	Alinen_Mustajärvi	1	dsDNA,Myoviridae,T4virus	0.9997029347801717,0.9997493682977694,0.9998512240950843	Bacteria,Enterobacteriaceae,Synechococcus	0.9997695252377757,0.9998691249366074,0.9998481933929427
SRR6754100_NODE_13_length_256164_cov_17.735898_extended_partial	SRR6754100_NODE_13_length_256164_cov_17.735898_extended_partial	1	336471	circular	Rimov	1	dsDNA,Myoviridae,T4virus	0.9997940160975719,0.9998250306984428,0.9998897956259883	Bacteria,Enterobacteriaceae,Synechococcus	0.9998074115000593,0.9998977538567245,0.9998893980434297
SRR9214416_k141_201164	SRR9214416_k141_201164	1	335997	high-quality	Jiricka_pond	1	dsDNA,Myoviridae,T4virus	0.9993049794856849,0.9993442591941639,0.9995040803169478	Bacteria,Rhodothermaceae,Rhodothermus	0.9994380204427957,0.9997055311073666,0.9996812061251797
SRR9302958_k141_93878_self_circular	SRR9302958_k141_93878_self_circular	1	335970	circular	Lugu	1	dsDNA,Myoviridae,Cp220virus	0.9986744165190682,0.9987105865885242,0.9987794865578214	Bacteria,Sphingomonadaceae,Sphingomonas	0.9987576463159556,0.9994151520604643,0.9993884362401407
ERS4600549_contig-140_149_extended_circular	ERS4600549_contig-140_149_extended_circular	1	335207	circular	Mekkojärvi	1	dsDNA,Myoviridae,T4virus	0.9997631885747595,0.9997919283981481,0.999856734313785	Bacteria,Enterobacteriaceae,Synechococcus	0.9998010971230119,0.999891619088128,0.9998807233801693
SRR6754094_k141_2239622_extended_partial	SRR6754094_k141_2239622_extended_partial	1	334731	circular	Rimov	1	dsDNA,Myoviridae,T4virus	0.9997029347801717,0.9997572497978395,0.9998512240950843	Bacteria,Enterobacteriaceae,Synechococcus	0.999775839614823,0.9998691249366074,0.9998525307245729
SRR9214415_k141_468346_extended_partial	SRR9214415_k141_468346_extended_partial	1	332174	circular	Jiricka_pond	1	dsDNA,Myoviridae,T4virus	0.9996819160146179,0.9996941977972783,0.9998319383296324	Bacteria,Enterobacteriaceae,Synechococcus	0.9997537392951577,0.9998629901680108,0.9998265067347917
SRR6754099_k141_1394415_self_circular	SRR6754099_k141_1394415_self_circular	1	332139	circular	Rimov	1	dsDNA,Myoviridae,T4virus	0.9997757998340919,0.9998139965983446,0.9998787751885873	Bacteria,Enterobacteriaceae,Synechococcus	0.9998074115000593,0.9998977538567245,0.9998893980434297
ERR3687826_contig-140_90_extended_circular	ERR3687826_contig-140_90_extended_circular	1	329707	circular	Lake_Rotsee	1	dsDNA,Myoviridae,T4virus	0.9992979732305002,0.9993836666945146,0.9995564273946033	Bacteria,Rhodothermaceae,Rhodothermus	0.9994332846600102,0.9997218904902907,0.9997245794414819
ERS4600569_NODE_342_length_55291_cov_6.167084_extended_partial	ERS4600569_NODE_342_length_55291_cov_6.167084_extended_partial,ERS4600570_NODE_45_length_91920_cov_2.623522_extended_partial	2	324524	high-quality	Björntjärnan	1	dsDNA,Myoviridae,T4virus	0.9977832208595835,0.9977427383799103,0.9976361161774511	Bacteria,Flavobacteriaceae,Cellulophaga	0.9982288172382493,0.9986626204459568,0.9987096438400132
ERS4600334_contig-140_3_self_circular	ERS4600334_contig-140_3_self_circular,ERS4600333_contig-140_3_extended_circular	2	324201	circular	Alinen_Mustajärvi	1	dsDNA,Myoviridae,T4virus	0.9991928794027307,0.9991803239927048,0.9992671409128229	Bacteria,Rhodothermaceae,Rhodothermus	0.9993338332215163,0.9995419372781259,0.999518556189047
SRR9214418_k141_1281281_extended_partial	SRR9214418_k141_1281281_extended_partial	1	323477	high-quality	Jiricka_pond	1	dsDNA,Myoviridae,Cp220virus	0.9989574692285272,0.9989296922904742,0.9989861197590932	Bacteria,Sphingomonadaceae,Sphingomonas	0.9991238801846956,0.9994826345150261,0.9994426528855183
ERS4600322_contig-140_1_extended_circular	ERS4600321_contig-140_301_extended_partial,ERS4600325_contig-140_85_extended_partial,ERS4600322_contig-140_1_extended_circular	3	322929	circular	Alinen_Mustajärvi	1	dsDNA,Myoviridae,T4virus	0.9995810259399592,0.9996421798968154,0.9997933667987282	Bacteria,Enterobacteriaceae,Synechococcus	0.9997063814673034,0.9998241366335662,0.9997115674465912
SRR6754096_k141_619695_extended_partial	SRR6754096_k141_619695_extended_partial	1	321839	high-quality	Rimov	1	dsDNA,Myoviridae,T4virus	0.9979527722350514,0.998046964282618,0.9976333610681007	Bacteria,Sphingomonadaceae,Sphingomonas	0.998140415959588,0.9988057650465424,0.9988462697863647
SRR9302960_k141_1794786_extended_circular	SRR9302960_k141_1794786_extended_circular	1	320195	circular	Fuxian	1	dsDNA,Myoviridae,T4virus	0.9995866309441069,0.9996484850968715,0.99980989745483	Bacteria,Enterobacteriaceae,Synechococcus	0.9997126958443506,0.9998364061707592,0.9997679527577839
SRR6754100_NODE_650_length_52604_cov_7.049660_extended_circular	SRR6754100_NODE_650_length_52604_cov_7.049660_extended_circular	1	318805	circular	Rimov	1	dsDNA,Myoviridae,T4virus	0.999208293164137,0.9992670204934765,0.9994159168177384	Bacteria,Rhodothermaceae,Rhodothermus	0.9993133114961127,0.9995971501954947,0.9995836161635
SRR9214416_k141_738105_extended_partial	SRR9214416_k141_738105_extended_partial,SRR9214418_k141_720049_extended_partial	2	315399	high-quality	Jiricka_pond	1	dsDNA,Myoviridae,Cp220virus	0.998734670313656,0.9988382668896606,0.9988153029793753	Bacteria,Sphingomonadaceae,Sphingomonas	0.9989012983937804,0.9993865231403471,0.9993797615768802
ERR3687821_contig-140_0_self_circular	ERR3687821_contig-140_0_self_circular	1	314934	circular	Lake_Rotsee	1	dsDNA,Myoviridae,Cba41virus	0.9971960966751116,0.9822461329419906,0.9834720990076096	Bacteria,Enterobacteriaceae,Cellulophaga	0.9977694463080626,0.9926423675298968,0.9917373832444542
SRR8894382_k141_1009948_self_circular	SRR8894382_k141_1009948_self_circular	1	313431	circular	Fuxian	1	dsDNA,Myoviridae,T4virus	0.9978813084321683,0.9984914808865741,0.9985783635752503	Bacteria,Rhodothermaceae,Rhodothermus	0.9982209242669403,0.9988364388895251,0.9988571131154402
ERS4600329_contig-140_4_extended_circular	ERS4600329_contig-140_4_extended_circular,ERS4600333_contig-140_43_extended_circular,ERS4600330_contig-140_7_extended_circular	3	312491	circular	Alinen_Mustajärvi	1	dsDNA,Myoviridae,T4virus	0.9992124969172477,0.9991945106928312,0.9993084675530772	Bacteria,Enterobacteriaceae,Synechococcus	0.9993306760329926,0.9994989938979502,0.9987963904726174
SRR9302957_k141_973683_extended_partial	SRR9302957_k141_973683_extended_partial	1	310229	high-quality	Lugu	1	dsDNA,Myoviridae,T4virus	0.9974427168576104,0.9977506198799805,0.9975534628969424	Bacteria,Hominidae,Bacillus	0.997791546627728,0.9981738838811,0.9983149466616643
SRR9302961_k141_3080899_extended_partial	SRR9302961_k141_3080899_extended_partial	1	309449	high-quality	Erhai	1	dsDNA,Myoviridae,T4virus	0.9991031993363675,0.999186629192761,0.999324998209179	Bacteria,Rhodothermaceae,Rhodothermus	0.9992406961600695,0.9995255778952018,0.999518556189047
SRR6754086_k141_3439794_extended_partial	SRR6754086_k141_3439794_extended_partial	1	306752	high-quality	Rimov	1	dsDNA,Myoviridae,T4virus	0.9991494406205861,0.9993190383939394,0.9994875496608461	Bacteria,Rhodothermaceae,Rhodothermus	0.9993148900903746,0.9996339588070738,0.9996096401532814
ERR2814753_NODE_3_length_306039_cov_12.448018	ERR2814753_NODE_3_length_306039_cov_12.448018	1	306039	high-quality	Soyang	1	dsDNA,Myoviridae,T4virus	0.9990415442907428,0.9991960869928451,0.9993305084278795	Bacteria,Rhodothermaceae,Rhodothermus	0.9992217530289278,0.999566476352512,0.9995532548420886
SRR9214418_k141_460466_self_circular	SRR9214418_k141_460466_self_circular	1	305355	circular	Jiricka_pond	1	dsDNA,Myoviridae,T4virus	0.9996342734793624,0.9996926214972643,0.9998236730015815	Bacteria,Enterobacteriaceae,Synechococcus	0.999734796164016,0.9998466307850867,0.9997939767475651
ERS4600330_contig-140_16_extended_partial	ERS4600330_contig-140_16_extended_partial	1	303611	high-quality	Alinen_Mustajärvi	1	dsDNA,Myoviridae,T4virus	0.9992825594690941,0.9993442591941639,0.9994875496608461	Bacteria,Rhodothermaceae,Rhodothermus	0.9994127629346067,0.9996441834214014,0.9996334954772474
SRR9214418_k141_84532_extended_partial	SRR9214418_k141_84532_extended_partial	1	303070	circular	Jiricka_pond	1	dsDNA,Myoviridae,T4virus	0.9992909669753156,0.9992370707932099,0.9993360186465801	Bacteria,Rhodothermaceae,Rhodothermus	0.9994143415288685,0.9995910154268981,0.9995749415002396
ERS4600466_contig-140_223_extended_partial	ERS4600466_contig-140_223_extended_partial,ERS4600467_contig-140_85_extended_partial	2	298227	high-quality	Loclat	1	dsDNA,Siphoviridae,Slashvirus	0.9989910992534135,0.999186629192761,0.999324998209179	Bacteria,Pseudomonadaceae,Pseudomonas	0.9992454319428549,0.999566476352512,0.9995554235079037
SRR8894380_k141_4915614_extended_partial	SRR8894380_k141_4915614_extended_partial	1	296304	high-quality	Fuxian	1	dsDNA,Myoviridae,T4virus	0.9990737730645921,0.9991093904920736,0.9992754062408737	Bacteria,Rhodothermaceae,Rhodothermus	0.9991696594182881,0.9994969489750847,0.9994730142069298
SRR9302958_k141_377312_extended_partial	SRR9302958_k141_377312_extended_partial	1	295969	high-quality	Lugu	1	dsDNA,Myoviridae,Bxz1virus	0.9930624061161806,0.9894135691057807,0.9900733410109047	Bacteria,Mycobacteriaceae,Mycobacterium	0.9945159635344726,0.9961494102442456,0.9964000147469275
SRR9302960_k141_10005_extended_partial	SRR9302960_k141_10005_extended_partial	1	295327	circular	Fuxian	1	dsDNA,Myoviridae,T4virus	0.9980032172723807,0.9977458909799384,0.9975479526782418	Bacteria,Enterobacteriaceae,Synechococcus	0.9982288172382493,0.9985051613853125,0.9985838612227371
SRR6754100_NODE_77_length_136722_cov_8.329478_extended_partial	SRR6754100_NODE_77_length_136722_cov_8.329478_extended_partial,SRR6754102_k141_2575198_extended_partial	2	292388	circular	Rimov	1	dsDNA,Myoviridae,T4virus	0.9991060018384413,0.9991440690923822,0.9992891817876252	Bacteria,Rhodothermaceae,Rhodothermus	0.9992343817830223,0.999566476352512,0.9995489175104584
SRR6754092_k141_1529486_extended_partial	SRR6754092_k141_1529486_extended_partial	1	283609	circular	Rimov	1	dsDNA,Myoviridae,T4virus	0.9976543057641862,0.998373258385522,0.9984461183264364	Bacteria,Rhodothermaceae,Rhodothermus	0.9981088440743517,0.9987137435175946,0.9987530171563153
SRR8894380_k141_2569660_extended_partial	SRR8894380_k141_2569660_extended_partial	1	281130	high-quality	Fuxian	1	dsDNA,Myoviridae,Bxz1virus	0.9940614981055086,0.9920428375291812,0.9923628368809958	Bacteria,Mycobacteriaceae,Mycobacterium	0.9942918031492955,0.9955359333845928,0.9956171263876751
ERS4600332_contig-140_233_extended_partial	ERS4600332_contig-140_233_extended_partial,ERS4600333_contig-140_753_extended_partial,ERS4600334_contig-140_1298_extended_partial	3	276318	high-quality	Alinen_Mustajärvi	1	dsDNA,Myoviridae,Cp220virus	0.9986604040086989,0.9987373836887627,0.9989255073533868	Bacteria,Sphingomonadaceae,Sphingomonas	0.9987844824184064,0.999337444991575,0.9993494002554688
SRR8894381_k141_2086209_extended_partial	SRR8894381_k141_2086209_extended_partial	1	274817	high-quality	Fuxian	1	dsDNA,Myoviridae,Bxz1virus	0.9977720108512881,0.9975819557784794,0.9974515238509817	Bacteria,Mycobacteriaceae,Mycobacterium	0.9980693792178066,0.9986094524514535,0.9986706078553413
SRR6754096_k141_1112242_extended_partial	SRR6754096_k141_1112242_extended_partial	1	270448	circular	Rimov	1	dsDNA,Myoviridae,Cp220virus	0.9983647400399076,0.9985277357868968,0.9985453022630468	Bacteria,Sphingomonadaceae,Sphingomonas	0.9984608705947354,0.999020481947421,0.9990306063806486
SRR6754089_k141_1723189_extended_partial	SRR6754089_k141_1723189_extended_partial	1	269700	high-quality	Rimov	1	dsDNA,Myoviridae,T4virus	0.9990163217720781,0.9990873222918771,0.9992698960221731	Bacteria,Rhodothermaceae,Rhodothermus	0.9992107028690951,0.9994969489750847,0.9994708455411146
SRR8894380_k141_598003_extended_circular	SRR8894380_k141_598003_extended_circular	1	269518	circular	Fuxian	1	dsDNA,Myoviridae,Bxz1virus	0.9971764791605946,0.9980422353825759,0.9981623420633565	Bacteria,Mycobacteriaceae,Mycobacterium	0.9979067840088401,0.9987403275148461,0.9987768724802814
SRR6754096_k141_2305480_extended_circular	SRR6754096_k141_2305480_extended_circular,SRR6754098_k141_834182_extended_circular,SRR6754088_k141_2683346_extended_circular,SRR6754086_k141_2115999_extended_circular,SRR6754092_k141_537521_extended_circular	5	268465	circular	Rimov	1	dsDNA,Myoviridae,T4virus	0.9970307490527544,0.9977506198799805,0.9977187694579598	Bacteria,Rhodothermaceae,Rhodothermus	0.9978531118039385,0.998294534330165,0.9984515726080159
SRR6754103_k141_1339013_extended_partial	SRR6754103_k141_1339013_extended_partial	1	267510	high-quality	Rimov	1	dsDNA,Myoviridae,T4virus	0.9955958679909424,0.9968868074722926,0.9969941756988335	Bacteria,Rhodothermaceae,Rhodothermus	0.9970038280910849,0.9975665417900437,0.9977510935497372
ERS4600458_contig-140_1	ERS4600458_contig-140_1	1	263367	high-quality	Lovojärvi	1	dsDNA,Myoviridae,T4virus	0.9967953388785508,0.9977711117801629,0.9977656063169147	Bacteria,Rhodothermaceae,Rhodothermus	0.9976352657958089,0.9981759288039656,0.9982954286693283
SRR6754089_k141_181909	SRR6754089_k141_181909	1	263300	high-quality	Rimov	1	dsDNA,Myoviridae,M12virus	0.9983325112660584,0.9983023248848907,0.9980466274706443	Bacteria,Enterobacteriaceae,Sinorhizobium	0.9984687635660444,0.9985440149197572,0.9986250658732241
ERS4600460_contig-140_3_self_circular	ERS4600463_contig-140_122_extended_circular,ERS4600460_contig-140_3_self_circular,ERS4600461_contig-140_2_self_circular	3	261840	circular	Loclat	1	dsDNA,Myoviridae,T4virus	0.9983871600564984,0.9986301952878087,0.9987602007923695	Bacteria,Sphingomonadaceae,Sphingomonas	0.998580843758633,0.9992842769970717,0.9992865089468308
SRR9302960_k141_483056_extended_circular	SRR9302960_k141_483056_extended_circular	1	261153	circular	Fuxian	1	dsDNA,Myoviridae,T4virus	0.997773412102325,0.9981604578836281,0.997977749736887	Bacteria,Rhodothermaceae,Rhodothermus	0.9981293657997553,0.9984765324651954,0.9985643432304012
SRR6754100_NODE_3960_length_19551_cov_23.296437_extended_circular	SRR6754100_NODE_3960_length_19551_cov_23.296437_extended_circular	1	260710	circular	Rimov	1	dsDNA,Myoviridae,T4virus	0.9984656301145662,0.9987562992889311,0.9988952011505337	Bacteria,Sphingomonadaceae,Sphingomonas	0.9985982082955128,0.9990961440934448,0.9990696423653205
SRR9214416_k141_837154_extended_partial	SRR9214416_k141_837154_extended_partial	1	260217	high-quality	Jiricka_pond	1	dsDNA,Myoviridae,T4virus	0.9990163217720781,0.9992197314930557,0.9993525493026818	Bacteria,Rhodothermaceae,Rhodothermus	0.9991886025494298,0.999566476352512,0.9995467488446433
SRR6754102_k141_1975015_extended_partial	SRR6754102_k141_1975015_extended_partial	1	260052	high-quality	Rimov	1	dsDNA,Myoviridae,T4virus	0.9968345739075847,0.997016064073443,0.9968481549032681	Bacteria,Bacillaceae,Bacillus	0.9974947709065077,0.9982515909499894,0.9984233799524195
SRR6754087_k141_1794375_self_circular	SRR6754087_k141_1794375_self_circular	1	258282	circular	Rimov	1	dsDNA,Myoviridae,Cba41virus	0.9983871600564984,0.9985702958872756,0.9986637719651092	Bacteria,Sphingomonadaceae,Sphingomonas	0.9984703421603063,0.999020481947421,0.9990306063806486
SRR9214415_k141_750475_extended_partial	SRR9214415_k141_750475_extended_partial	1	257441	high-quality	Jiricka_pond	1	dsDNA,Myoviridae,Cp220virus	0.9986870277784006,0.9988382668896606,0.9989117318066354	Bacteria,Sphingomonadaceae,Sphingomonas	0.9988050041438099,0.9994171969833298,0.9993992795692163
SRR9214416_k141_1064211_self_circular	SRR9214416_k141_1064211_self_circular	1	254885	circular	Jiricka_pond	1	dsDNA,Myoviridae,T4virus	0.9976683182745555,0.9974117153769643,0.9973082581647665	Bacteria,Bacillaceae,Bacillus	0.9981198942341845,0.998499026616716,0.9985925358859976
SRR9302958_k141_1305547	SRR9302958_k141_1305547	1	254115	high-quality	Lugu	1	dsDNA,Myoviridae,Slashvirus	0.9979317534694976,0.9978893342812151,0.9976691774896546	Bacteria,Bacillaceae,Synechococcus	0.9981846165989187,0.9985746887627399,0.9986619331920809
ERS4600502_contig-140_4_self_circular	ERS4600503_contig-140_18_extended_circular,ERS4600502_contig-140_4_self_circular	2	252701	circular	Loclat	1	dsDNA,Myoviridae,Cr3virus	0.9957864381319642,0.9970018773733167,0.9967682567321097	Bacteria,Bacillaceae,Bacillus	0.9970590788902483,0.9981493448067139,0.9982780793428075
SRR8894380_k141_3556293_extended_partial	SRR8894380_k141_3556293_extended_partial	1	252278	high-quality	Fuxian	1	dsDNA,Myoviridae,Bxz1virus	0.9929489047821896,0.9931226030387912,0.9937348813374403	Bacteria,Enterobacteriaceae,Mycobacterium	0.9952957890998066,0.9971616470626729,0.99739109502443
ERR3687828_contig-140_61_extended_partial	ERR3687828_contig-140_61_extended_partial,ERR3687829_contig-140_30_extended_partial	2	250298	circular	Lake_Rotsee	1	dsDNA,Myoviridae,T4virus	0.9992559356993924,0.9993221909939675,0.999506835426298	Bacteria,Rhodothermaceae,Rhodothermus	0.9993985555862505,0.9996973514159045,0.9996942181200703
SRR6754094_k141_2430747_self_circular	SRR6754094_k141_2430747_self_circular	1	249445	circular	Rimov	1	dsDNA,Myoviridae,T4virus	0.9985412976705603,0.9987326547887206,0.9988593847289798	Bacteria,Sphingomonadaceae,Sphingomonas	0.9986834523856506,0.9993251754543818,0.9993320509289481
SRR6754102_k141_1629967_self_circular	SRR6754100_NODE_815_length_46258_cov_4.588151_extended_partial,SRR6754102_k141_1629967_self_circular	2	244437	circular	Rimov	1	dsDNA,Myoviridae,Cba41virus	0.9984263950855323,0.998702705088454,0.9988428540728782	Bacteria,Sphingomonadaceae,Sphingomonas	0.9985587434389676,0.9992924566885337,0.999312532936612
ERS4600331_contig-140_0	ERS4600331_contig-140_0	1	246805	high-quality	Alinen_Mustajärvi	1	dsDNA,Myoviridae,T4virus	0.9954949779162836,0.9959347222638191,0.995175803527642	Bacteria,Enterobacteriaceae,Bacillus	0.9967670389518134,0.9970348618450112,0.997098325139391
SRR6754087_k141_2595029_extended_partial	SRR6754087_k141_2595029_extended_partial	1	245956	high-quality	Rimov	1	dsDNA,Myoviridae,T4virus	0.9979289509674237,0.9975835320784935,0.9974680545070834	Bacteria,Enterobacteriaceae,Bacillus	0.9981719878448242,0.9985828684542019,0.9986619331920809
ERS4600464_contig-140_27_extended_circular	ERS4600464_contig-140_27_extended_circular	1	244697	circular	Loclat	1	dsDNA,Myoviridae,Rslunavirus	0.9987304665605452,0.9990873222918771,0.9992147938351673	Bacteria,Pseudomonadaceae,Pseudomonas	0.9989597063814672,0.9986851145974773,0.9987248245007189
ERS4600332_contig-140_0_self_circular	ERS4600332_contig-140_0_self_circular,ERS4600333_contig-140_6_self_circular	2	244446	circular	Alinen_Mustajärvi	1	dsDNA,Myoviridae,Rsl2virus	0.9992615407035401,0.9956494119612798,0.9942308010204925	Bacteria,Burkholderiaceae,Ralstonia	0.9993796124551088,0.9976565183961261,0.9979397674756513
SRR9214416_k141_583538_extended_circular	SRR9214416_k141_583538_extended_circular	1	243903	circular	Jiricka_pond	1	dsDNA,Myoviridae,T4virus	0.9992026881599892,0.9984441918861533,0.9983138730776224	Bacteria,Synechococcaceae,Synechococcus	0.9993054185248037,0.9995092185122777,0.9995033755283412
ERS4600513_contig-140_0	ERS4600513_contig-140_0	1	242894	high-quality	Mekkojärvi	1	dsDNA,Myoviridae,T4virus	0.9971218303701544,0.9884189237969284,0.9885332348840925	Bacteria,Bacillaceae,Bacillus	0.997567386242551,0.9942885304366319,0.9943332762251336
ERS4600521_contig-140_224_extended_circular	ERS4600531_contig-140_475_extended_partial,ERS4600520_contig-140_241_extended_partial,ERS4600518_contig-140_11_extended_partial,ERS4600521_contig-140_224_extended_circular,ERS4600516_contig-140_52_extended_partial	5	239323	circular	Mekkojärvi	1	dsDNA,Myoviridae,T4virus	0.9932445687509809,0.9910229714201044,0.9914095690457955	Bacteria,Bacillaceae,Bacillus	0.9955673073128379,0.9960512539467011,0.9959489322573859
SRR9302961_k141_3452371_extended_partial	SRR9302961_k141_3452371_extended_partial	1	239041	circular	Erhai	1	dsDNA,Myoviridae,T4virus	0.9958508956796628,0.995986740164282,0.9956799885387451	Bacteria,Bacillaceae,Bacillus	0.9967196811239591,0.9980430088177074,0.9981956700418335
SRR5338504_k141_3022118_self_circular	SRR5338504_k141_3022118_self_circular	1	238977	circular	Tous	1	dsDNA,Myoviridae,T4virus	0.993373483846378,0.9934094896413445,0.9945641692518776	Bacteria,Enterobacteriaceae,Bacillus	0.9939950274280753,0.9970082778477596,0.9972739870704144
SRR9302957_k141_1609161_extended_partial	SRR9302957_k141_1609161_extended_partial	1	237001	circular	Lugu	1	dsDNA,Myoviridae,T4virus	0.9989826917471919,0.9979334706816079,0.9977215245673101	Bacteria,Synechococcaceae,Synechococcus	0.9990970440822448,0.9992167945425099,0.9992040996458569
ERS4600324_contig-140_203_extended_partial	ERS4600324_contig-140_203_extended_partial	1	234888	high-quality	Alinen_Mustajärvi	1	dsDNA,Myoviridae,Bxz1virus	0.9942520682465305,0.9953577964586844,0.9941564130680347	Bacteria,Enterobacteriaceae,Mycobacterium	0.9962603101937725,0.9975869910186987,0.9978400088481565
ERS4600481_contig-140_0_self_circular	ERS4600481_contig-140_0_self_circular	1	232797	circular	Loclat	1	dsDNA,Myoviridae,Cp220virus	0.9984165863282739,0.9986759079882156,0.9986995883866631	Bacteria,Sphingomonadaceae,Sphingomonas	0.9985697935988003,0.9992924566885337,0.999290846278461
SRR9302960_k141_422557	SRR9302960_k141_422557	1	231986	high-quality	Fuxian	1	dsDNA,Myoviridae,Bxz1virus	0.9900385063784947,0.9917969347269927,0.992327020459442	Bacteria,Mycobacteriaceae,Mycobacterium	0.9925395635186867,0.9946750208582132,0.9953178505051907
ERR3687821_contig-140_193_extended_partial	ERR3687821_contig-140_193_extended_partial	1	231898	circular	Lake_Rotsee	1	dsDNA,Myoviridae,T4virus	0.9978266596417281,0.9983070537849328,0.9983579548272271	Bacteria,Enterobacteriaceae,Bacillus	0.9982509175579147,0.9989080111898179,0.9989395224164141
SRR6754087_k141_1180667_extended_partial	SRR6754087_k141_1180667_extended_partial	1	231321	high-quality	Rimov	1	dsDNA,Myoviridae,Bxz1virus	0.9744734098603233,0.9865336689801496,0.9879987436701363	Bacteria,Mycobacteriaceae,Mycobacterium	0.9850617625004933,0.9934664714446971,0.9941012289829174
ERS4600570_NODE_15_length_139485_cov_14.079285_extended_circular	ERS4600570_NODE_15_length_139485_cov_14.079285_extended_circular	1	231249	circular	Björntjärnan	1	dsDNA,Myoviridae,T4virus	0.9888124117211847,0.9922288409308366,0.9917594679332823	Bacteria,Enterobacteriaceae,Bacillus	0.9934788271044634,0.9959121991918465,0.9957841136554381
SRR6754098_k141_244118_extended_partial	SRR6754098_k141_244118_extended_partial	1	228681	high-quality	Rimov	1	dsDNA,Myoviridae,T4virus	0.9941455731677241,0.9922004675305841,0.9922168160854304	Bacteria,Bacillaceae,Bacillus	0.995433126800584,0.9973477350434342,0.9976079616059405
ERS4600504_contig-140_5_self_circular	ERS4600504_contig-140_5_self_circular,ERS4600505_contig-140_5_self_circular	2	227780	circular	Mekkojärvi	1	dsDNA,Myoviridae,Rsl2virus	0.9992531331973186,0.9922855877313417,0.9906381384277142	Bacteria,Burkholderiaceae,Ralstonia	0.999360669323967,0.9969878286191045,0.9974301310091019
SRR8894380_k141_507515	SRR8894380_k141_507515	1	226967	high-quality	Fuxian	1	dsDNA,Myoviridae,T4virus	0.998752886577136,0.9984363103860832,0.9984461183264364	Bacteria,Synechococcaceae,Synechococcus	0.9986139942381309,0.9988507533495836,0.9988809684394064
ERS4600339_contig-140_1083_extended_partial	ERS4600339_contig-140_1083_extended_partial	1	226764	circular	Alinen_Mustajärvi	1	dsDNA,Myoviridae,T4virus	0.9967182700715198,0.9974117153769643,0.9967021341077027	Bacteria,Enterobacteriaceae,Bacillus	0.9974142625991554,0.9981207158865968,0.9982780793428075
SRR9302960_k141_674513_extended_partial	SRR9302960_k141_674513_extended_partial	1	224626	high-quality	Fuxian	1	dsDNA,Myoviridae,Cba41virus	0.9809920296841019,0.9896626245079974,0.988527724665392	Bacteria,Flavobacteriaceae,Cellulophaga	0.9864982832787402,0.9949020072962848,0.9953200191710058
ERS4600336_contig-140_203_extended_partial	ERS4600336_contig-140_203_extended_partial	1	224073	high-quality	Alinen_Mustajärvi	1	dsDNA,Myoviridae,T4virus	0.9965725399636796,0.9973218662761646,0.9970602983232405	Bacteria,Enterobacteriaceae,Synechococcus	0.9970843363984372,0.9981841084954276,0.9983214526591095
SRR9302958_k141_39093_extended_partial	SRR9302958_k141_39093_extended_partial	1	223104	high-quality	Lugu	1	dsDNA,Myoviridae,Bxz1virus	0.9771147680649284,0.9849069273656716,0.9856651660504405	Bacteria,Mycobacteriaceae,Mycobacterium	0.9860183906231501,0.990632208353101,0.9908981095740089
ERS4600335_contig-140_62_extended_partial	ERS4600335_contig-140_62_extended_partial	1	221747	high-quality	Alinen_Mustajärvi	1	dsDNA,Myoviridae,T4virus	0.9957233818353025,0.9951954375572394,0.9955477432899312	Bacteria,Enterobacteriaceae,Synechococcus	0.9971806306484076,0.9976606082418571,0.997952779470542
SRR6754087_k141_3226511_extended_partial	SRR6754087_k141_3226511_extended_partial,SRR6754089_k141_2087444_extended_partial	2	221577	high-quality	Rimov	1	dsDNA,Myoviridae,Bxz1virus	0.972894199941708,0.9776480658010678,0.983133220557524	Bacteria,Mycobacteriaceae,Mycobacterium	0.9817325072023363,0.9918223534608275,0.9924964162797405
SRR8894380_k141_3219739_extended_partial	SRR8894380_k141_3219739_extended_partial	1	221282	high-quality	Fuxian	1	dsDNA,Myoviridae,T4virus	0.9925299307221488,0.9950031289555279,0.9944677404246175	Bacteria,Enterobacteriaceae,Bacillus	0.9951616085875528,0.9961841739329592,0.9961332688516698
SRR6754102_k141_671611_extended_circular	SRR6754102_k141_671611_extended_circular,SRR6754103_k141_901120_extended_partial	2	219838	circular	Rimov	1	dsDNA,Myoviridae,T4virus	0.9973642467995426,0.997074387173962,0.996666317686149	Bacteria,Enterobacteriaceae,Bacillus	0.9978862622834366,0.9980614131234969,0.9982498866872112
SRR6475630_k141_2901000_extended_circular	SRR6475630_k141_2901000_extended_circular	1	219548	circular	Zurich	1	dsDNA,Myoviridae,T4virus	0.9967659126067754,0.9968174502716753,0.9965065213438321	Bacteria,Flavobacteriaceae,Synechococcus	0.9975310785745294,0.9979325829829698,0.9980850680852633
SRR6754100_NODE_4096_length_19143_cov_9.374842_extended_partial	SRR6754100_NODE_4096_length_19143_cov_9.374842_extended_partial	1	218694	high-quality	Rimov	1	dsDNA,Myoviridae,T4virus	0.9988243503800193,0.9990542199915825,0.9992533653660713	Bacteria,Rhodothermaceae,Rhodothermus	0.9990765223568412,0.9994969489750847,0.9994621708778543
SRR9302961_k141_1837111_self_circular	SRR9302961_k141_1837111_self_circular	1	215773	circular	Erhai	1	dsDNA,Myoviridae,T4virus	0.9986646077618098,0.9987799437891415,0.9990164259619464	Bacteria,Rhodothermaceae,Rhodothermus	0.9987292316192431,0.9992208843882409,0.999227954969823
SRR6754086_k141_3043161	SRR6754086_k141_3043161	1	215064	high-quality	Rimov	1	dsDNA,Myoviridae,Bxz1virus	0.9882687263188574,0.9928294112361817,0.9934731459491627	Bacteria,Enterobacteriaceae,Cronobacter	0.9908694107896918,0.9965808889688681,0.9968727838946202
SRR8894380_k141_3376146_self_circular	SRR8894380_k141_3376146_self_circular	1	215009	circular	Fuxian	1	dsDNA,Myoviridae,Cr3virus	0.997697744546331,0.9980753376828705,0.9980383621425934	Bacteria,Bacillaceae,Bacillus	0.9980693792178066,0.9988446185809872,0.9988853057710366
SRR6754092_k141_1591124_extended_partial	SRR6754092_k141_1591124_extended_partial,SRR6754096_k141_1289015_extended_partial	2	214955	circular	Rimov	1	dsDNA,Myoviridae,T4virus	0.9917172051207318,0.9941755714481626,0.9936329422914796	Bacteria,Enterobacteriaceae,Mycobacterium	0.9943644184853389,0.9969755590819114,0.9972978423943806
ERS4600326_contig-140_59_extended_partial	ERS4600326_contig-140_59_extended_partial	1	214734	high-quality	Alinen_Mustajärvi	1	dsDNA,Myoviridae,Bxz1virus	0.9941707956863888,0.9958748228632859,0.9955560086179821	Bacteria,Enterobacteriaceae,Mycobacterium	0.9964260625912624,0.9976606082418571,0.9979072374884247
SRR6754101_k141_1751149_extended_circular	SRR6754101_k141_1751149_extended_circular	1	214248	circular	Rimov	1	dsDNA,Myoviridae,Cr3virus	0.9975828419613031,0.9980674561828003,0.9979584639714351	Bacteria,Bacillaceae,Bacillus	0.9979383558940763,0.9987525970520392,0.9987920531409872
SRR6754098_k141_1854741_self_circular	SRR6754096_k141_106064_extended_partial,SRR6754098_k141_1854741_self_circular,SRR6754097_k141_641244_extended_circular	3	212205	circular	Rimov	1	dsDNA,Myoviridae,Bxz1virus	0.9900216913660516,0.991324044722784,0.9918834478540454	Bacteria,Enterobacteriaceae,Bacillus	0.9937882315797782,0.9959633222634843,0.9961527868440057
SRR6754086_k141_3732361_self_circular	SRR6754086_k141_3732361_self_circular,SRR6754088_k141_3029946_self_circular,SRR6754092_k141_3142232_self_circular,SRR6754098_k141_2312200_self_circular,SRR6754096_k141_2613866_self_circular,SRR6754094_k141_4613071_self_circular,SRR6754097_k141_1829203_self_circular	7	212754	circular	Rimov	1	dsDNA,Myoviridae,Bxz1virus	0.9860673609398471,0.9915431504247341,0.9922471222882836	Bacteria,Enterobacteriaceae,Mycobacterium	0.9919191759737953,0.9962966446905622,0.9965301346958337
ERR2814753_NODE_358_length_23921_cov_114.399428_extended_partial	ERR2814753_NODE_358_length_23921_cov_114.399428_extended_partial	1	212749	high-quality	Soyang	1	dsDNA,Myoviridae,T4virus	0.9992951707284263,0.9984678363863637,0.9984984654040919	Bacteria,Synechococcaceae,Synechococcus	0.9993796124551088,0.9994601403635055,0.9994339782222579
ERR3687821_contig-140_102_extended_partial	ERR3687821_contig-140_102_extended_partial	1	212224	high-quality	Lake_Rotsee	1	dsDNA,Myoviridae,T4virus	0.998357733784723,0.9986506871879911,0.9988070376513244	Bacteria,Rhodothermaceae,Rhodothermus	0.9985003354512806,0.9990388862532106,0.9990522930387996
SRR6754089_k141_2842442_extended_circular	SRR6754087_k141_2312476_extended_partial,SRR6754089_k141_2842442_extended_circular	2	210146	circular	Rimov	1	dsDNA,Myoviridae,T4virus	0.9940446830930655,0.992730104335298,0.9936907995878357	Bacteria,Enterobacteriaceae,Bacillus	0.9954678558743439,0.9964765979027271,0.9963371234382895
ERS4600333_contig-140_34_extended_circular	ERS4600333_contig-140_34_extended_circular	1	210926	circular	Alinen_Mustajärvi	1	dsDNA,Myoviridae,Cr3virus	0.9973838643140596,0.9978136718805417,0.9975176464753887	Bacteria,Bacillaceae,Bacillus	0.9978704763408185,0.9984356340078853,0.99853831924062
SRR8894380_k141_1103308_extended_partial	SRR8894380_k141_1103308_extended_partial	1	210571	high-quality	Fuxian	1	dsDNA,Myoviridae,Cr3virus	0.9978588884155775,0.9983433086852554,0.9982753015467184	Bacteria,Bacillaceae,Bacillus	0.9982556533407001,0.9989816284129762,0.9990110883883127
ERS4600329_contig-140_379_extended_partial	ERS4600329_contig-140_379_extended_partial	1	209782	high-quality	Alinen_Mustajärvi	1	dsDNA,Myoviridae,T4virus	0.998321301257763,0.9983102063849608,0.9979198924405309	Bacteria,Enterobacteriaceae,Synechococcus	0.9984324558980228,0.9985665090712779,0.9986619331920809
SRR6754101_k141_1924512_self_circular	SRR6754101_k141_1924512_self_circular	1	209286	circular	Rimov	1	dsDNA,Myoviridae,T4virus	0.9851789677824362,0.981724377637347,0.9831194450107725	Bacteria,Synechococcaceae,Synechococcus	0.9909436047199969,0.9924440100119424,0.9935070145495789
SRR6754095_k141_510862_extended_partial	SRR6754095_k141_510862_extended_partial	1	208999	high-quality	Rimov	1	dsDNA,Myoviridae,T4virus	0.9982610474631751,0.9969435542727977,0.997112645400896	Bacteria,Synechococcaceae,Synechococcus	0.9982524961521765,0.9987894056636184,0.9988115711333231
SRR9214414_k141_1480392_extended_partial	SRR9214414_k141_1480392_extended_partial	1	208904	high-quality	Jiricka_pond	1	dsDNA,Myoviridae,M12virus	0.9966313925072304,0.9966645491703144,0.9964045822978714	Bacteria,Enterobacteriaceae,Synechococcus	0.9974300485417735,0.9975522273299852,0.9978313341848961
ERS4600477_contig-140_1_self_circular	ERS4600477_contig-140_1_self_circular	1	208806	circular	Loclat	1	dsDNA,Myoviridae,T4virus	0.9946051835078358,0.9948171255538725,0.9943768218160579	Bacteria,Enterobacteriaceae,Bacillus	0.996429219779786,0.9974581608781716,0.9977380815548467
ERS4600507_contig-140_1929_extended_partial	ERS4600507_contig-140_1929_extended_partial	1	207716	high-quality	Mekkojärvi	1	dsDNA,Myoviridae,M12virus	0.9983353137681322,0.9982849855847363,0.9977215245673101	Bacteria,Enterobacteriaceae,Vibrio	0.9984798137258771,0.9985133410767746,0.9986077165467033
SRR8561390_k141_970128_extended_circular	SRR8561390_k141_970128_extended_circular	1	207526	circular	Baikal	1	dsDNA,Myoviridae,Bxz1virus	0.9871841580162769,0.992405386532408,0.9923711022090467	Bacteria,Enterobacteriaceae,Bacillus	0.9922427877974663,0.9966279221947748,0.9968727838946202
SRR6754087_k141_3334893_extended_circular	SRR6754087_k141_3334893_extended_circular	1	207204	circular	Rimov	1	dsDNA,Myoviridae,T4virus	0.9951404614039414,0.9961885065660777,0.9962255001901026	Bacteria,Enterobacteriaceae,Bacillus	0.9965570859149927,0.9979673466716835,0.9981132607408596
SRR6754089_k141_925755_extended_partial	SRR6754089_k141_925755_extended_partial	1	206084	high-quality	Rimov	1	dsDNA,Myoviridae,T4virus	0.9978070421272112,0.998374834685536,0.9983992814674815	Bacteria,Sphingomonadaceae,Sphingomonas	0.9980772721891156,0.9989366401099351,0.9989395224164141
SRR8894380_k141_5539714_extended_circular	SRR8894380_k141_5539714_extended_circular	1	206051	circular	Fuxian	1	dsDNA,Myoviridae,T4virus	0.9875554895410623,0.9849841660663591,0.9864283313404709	Bacteria,Enterobacteriaceae,Bacillus	0.9924211689490509,0.9930411274886711,0.9934506292383862
ERS4600456_contig-140_919_extended_circular	ERS4600455_contig-140_5_extended_partial,ERS4600456_contig-140_919_extended_circular,ERS4600458_contig-140_3030_extended_circular,ERS4600459_contig-140_1500_extended_partial	4	205961	circular	Lovojärvi	1	dsDNA,Myoviridae,T4virus	0.9900343026253839,0.9938224802450201,0.9944677404246175	Bacteria,Enterobacteriaceae,Mycobacterium	0.9941686727968744,0.9971227935282281,0.9974865163202946
ERS4600484_contig-140_323_extended_partial	ERS4600484_contig-140_323_extended_partial	1	204915	high-quality	Loclat	1	dsDNA,Myoviridae,T4virus	0.9992531331973186,0.9986743316882015,0.9990191810712967	Bacteria,Synechococcaceae,Synechococcus	0.999352776352658,0.999562386506781,0.9995445801788282
ERR3687829_contig-140_25_extended_circular	ERR3687830_contig-140_150_extended_partial,ERR3687829_contig-140_25_extended_circular,ERR3687828_contig-140_110_extended_circular	3	203887	circular	Lake_Rotsee	1	dsDNA,Myoviridae,Cr3virus	0.9962348384637805,0.9973770367766557,0.9973082581647665	Bacteria,Bacillaceae,Bacillus	0.9974410987016062,0.998290444484434,0.998393018631008
SRR6754102_k141_1224230_extended_partial	SRR6754102_k141_1224230_extended_partial	1	203582	high-quality	Rimov	1	dsDNA,Myoviridae,T4virus	0.9933300450642334,0.9925976951341194,0.9932775331852921	Bacteria,Enterobacteriaceae,Bacillus	0.9949327124195904,0.996777201563957,0.9970484458256436
SRR9302962_k141_2177697_extended_circular	SRR9302962_k141_2177697_extended_circular	1	202717	circular	Erhai	1	dsDNA,Myoviridae,Cr3virus	0.9978953209425375,0.9983338508851712,0.9981623420633565	Bacteria,Bacillaceae,Bacillus	0.9982193456726784,0.9989161908812799,0.998956871742935
ERR3687821_contig-140_7_self_circular	ERR3687821_contig-140_7_self_circular,ERR3687822_contig-140_3_self_circular	2	202025	circular	Lake_Rotsee	1	dsDNA,Myoviridae,T4virus	0.9952581664910432,0.9965951919696973,0.9962502961742552	Bacteria,Enterobacteriaceae,Bacillus	0.9969564702632306,0.9979284931372389,0.9980850680852633
ERS4600388_contig-140_980_extended_circular	ERS4600388_contig-140_980_extended_circular	1	201156	circular	SAS2	1	dsDNA,Myoviridae,T4virus	0.9974707418783489,0.9980422353825759,0.9978758106909263	Bacteria,Bacillaceae,Bacillus	0.997982556533407,0.9985358352282951,0.9986380778681148
ERS4600334_contig-140_699_extended_partial	ERS4600334_contig-140_699_extended_partial	1	200063	high-quality	Alinen_Mustajärvi	1	dsDNA,Myoviridae,Bxz1virus	0.9887801829473354,0.9951245040566081,0.995004986747924	Bacteria,Mycobacteriaceae,Mycobacterium	0.9935119775839615,0.9971002993767075,0.99749302231774
ERR3687830_contig-140_1307_extended_partial	ERR3687830_contig-140_1307_extended_partial,ERR3687826_contig-140_1034_extended_partial	2	199714	high-quality	Lake_Rotsee	1	dsDNA,Myoviridae,Cr3virus	0.997829462143802,0.9984205473859429,0.9984957102947416	Bacteria,Bacillaceae,Bacillus	0.9982082955128458,0.9990020776416314,0.9990241003832032
SRR6754089_k141_2068140_extended_partial	SRR6754089_k141_2068140_extended_partial	1	198974	high-quality	Rimov	1	dsDNA,Myoviridae,M12virus	0.9983731475461292,0.9983259693851011,0.997853769816124	Bacteria,Enterobacteriaceae,Synechococcus	0.9985461146848731,0.9985603743026813,0.9986575958604507
SRR8894380_k141_136724_extended_partial	SRR8894380_k141_136724_extended_partial	1	198449	circular	Fuxian	1	dsDNA,Myoviridae,T4virus	0.9928508172096048,0.9910150899200343,0.9920019175561078	Bacteria,Bacillaceae,Bacillus	0.9955388926161254,0.9962966446905622,0.9965171227009432
ERR2814725_NODE_2_length_197682_cov_10.730667_self_circular	ERR2814725_NODE_2_length_197682_cov_10.730667_self_circular	1	197555	circular	Soyang	1	dsDNA,Myoviridae,T4virus	0.9979163397080913,0.9979082498813834,0.9977215245673101	Bacteria,Enterobacteriaceae,Bacillus	0.9982840680374127,0.9986687552145533,0.9986814511844169
SRR6754087_k141_2592353_extended_partial	SRR6754087_k141_2592353_extended_partial	1	197290	high-quality	Rimov	1	dsDNA,Myoviridae,M12virus	0.9984053763199785,0.9984741415864199,0.9984957102947416	Bacteria,Enterobacteriaceae,Synechococcus	0.9985697935988003,0.998944819801397,0.9989633777403804
SRR8894379_k141_2349398_extended_circular	SRR8894379_k141_2349398_extended_circular,SRR8894378_k141_1709035_extended_circular,SRR8894381_k141_1494016_extended_circular,SRR8894382_k141_164807_extended_circular	4	196779	circular	Fuxian	1	dsDNA,Myoviridae,T4virus	0.994582763491245,0.99620111696619,0.9958893768493672	Bacteria,Enterobacteriaceae,Bacillus	0.9960945577962824,0.9973743190406857,0.9976708529145785
SRR9214418_k141_1251000_extended_circular	SRR9214418_k141_1251000_extended_circular	1	196525	circular	Jiricka_pond	1	dsDNA,Myoviridae,T4virus	0.9980592673138579,0.9985970929875141,0.9987188741521151	Bacteria,Rhodothermaceae,Rhodothermus	0.9983424760250996,0.9990041225644969,0.9990306063806486
SRR9214418_k141_1052534_extended_partial	SRR9214418_k141_1052534_extended_partial	1	196245	circular	Jiricka_pond	1	dsDNA,Phycodnaviridae,Prasinovirus	0.9983647400399076,0.9978278585806679,0.99734131947697	Bacteria,Hominidae,Aureococcus	0.9691116460791666,0.9875750486691642,0.988267517940288
ERS4600324_contig-140_2270_extended_partial	ERS4600324_contig-140_2270_extended_partial	1	195714	high-quality	Alinen_Mustajärvi	1	dsDNA,Myoviridae,T4virus	0.9893981346546197,0.9936285953432945,0.9939525349761132	Bacteria,Enterobacteriaceae,Cronobacter	0.993914519120723,0.9972168599800415,0.997328203715792
SRR6754089_k141_861939_extended_partial	SRR6754089_k141_861939_extended_partial	1	195341	high-quality	Rimov	1	dsDNA,Myoviridae,Cr3virus	0.9969901127726835,0.9977364331798543,0.9976774428177054	Bacteria,Bacillaceae,Bacillus	0.9977141955088993,0.9986053626057225,0.9986814511844169
SRR6754098_k141_1350874_self_circular	SRR6754096_k141_818957_extended_partial,SRR6754098_k141_1350874_self_circular,SRR6754101_k141_282719_extended_partial,SRR6754100_NODE_63_length_150050_cov_187.739706_extended_partial	4	194293	circular	Rimov	1	dsDNA,Myoviridae,Chlorovirus	0.996487063650427,0.9970270981735412,0.9970520329951896	Bacteria,Enterobacteriaceae,Bacillus	0.9973495402344212,0.9981513897295794,0.9982802480086226
ERR3687822_contig-140_4_self_circular	ERR3687821_contig-140_18_extended_circular,ERR3687822_contig-140_4_self_circular	2	194718	circular	Lake_Rotsee	1	dsDNA,Myoviridae,T4virus	0.9981657623926642,0.9984977860866303,0.9985728533565498	Bacteria,Enterobacteriaceae,Synechococcus	0.9983850980701685,0.9989877631815728,0.999017594385758
SRR6754103_k141_746778_extended_partial	SRR6754103_k141_746778_extended_partial	1	194531	high-quality	Rimov	1	dsDNA,Myoviridae,Cr3virus	0.9980032172723807,0.9983622242854238,0.9983221384056733	Bacteria,Bacillaceae,Bacillus	0.9983124827341252,0.9990061674873624,0.9990306063806486
SRR6754087_k141_2572923_extended_partial	SRR6754087_k141_2572923_extended_partial	1	194241	high-quality	Rimov	1	dsDNA,Myoviridae,Cr3virus	0.9969775015133511,0.9977837221802751,0.9976746877083551	Bacteria,Bacillaceae,Bacillus	0.9977331386400411,0.9985828684542019,0.9986619331920809
SRR8894380_k141_1414610_extended_circular	SRR8894380_k141_1414610_extended_circular	1	194079	circular	Fuxian	1	dsDNA,Myoviridae,Cr3virus	0.997921944712239,0.998374834685536,0.9982835668747693	Bacteria,Bacillaceae,Bacillus	0.998206716918584,0.9989611791843211,0.9989807270669012
SRR7054680_k141_966174	SRR7054680_k141_966174	1	193098	high-quality	Zurich	1	dsDNA,Myoviridae,Bxz1virus	0.9907993856915455,0.9917922058269506,0.9926548784721265	Bacteria,Enterobacteriaceae,Cronobacter	0.9935609140060776,0.9966054280432542,0.9967708566013103
ERR3687822_contig-140_5_self_circular	ERR3687822_contig-140_5_self_circular	1	192501	circular	Lake_Rotsee	1	dsDNA,Myoviridae,Bxz1virus	0.9901197789386365,0.9938792270455251,0.9924014084118998	Bacteria,Mycobacteriaceae,Mycobacterium	0.9944196692845022,0.9966994944950677,0.9969356752032582
SRR9214414_k141_1397552_self_circular	SRR9214414_k141_1397552_self_circular	1	191899	circular	Jiricka_pond	1	dsDNA,Myoviridae,M12virus	0.9976571082662601,0.9974353598771747,0.9973082581647665	Bacteria,Enterobacteriaceae,Synechococcus	0.9979478274596472,0.9982413663356619,0.9983951872968231
SRR6754088_k141_1188030_extended_circular	SRR6754088_k141_1188030_extended_circular	1	191848	circular	Rimov	1	dsDNA,Myoviridae,T4virus	0.9897974912001435,0.9925598639337828,0.9936053911979766	Bacteria,Enterobacteriaceae,Cronobacter	0.9946706657721299,0.9966872249578745,0.9970896504761306
SRR6754088_k141_1416072_extended_circular	SRR6754092_k141_1340541_extended_partial,SRR6754088_k141_1416072_extended_circular	2	159634	circular	Rimov	1	dsDNA,Myoviridae,T4virus	0.9987150527991391,0.9987957067892818,0.9990164259619464	Bacteria,Enterobacteriaceae,Synechococcus	0.9988381546233079,0.9993313102229784,0.9993320509289481
SRR6754089_k141_1070011_extended_partial	SRR6754089_k141_1070011_extended_partial	1	191393	high-quality	Rimov	1	dsDNA,Myoviridae,T4virus	0.9990611618052597,0.9991314586922699,0.999278161350224	Bacteria,Rhodothermaceae,Rhodothermus	0.9992154386518804,0.9995092185122777,0.9995033755283412
SRR5896115_k141_1483092_extended_partial	SRR5896115_k141_1483092_extended_partial	1	190337	high-quality	Baikal	1	dsDNA,Myoviridae,T4virus	0.998489451382194,0.9987862489891977,0.9988070376513244	Bacteria,Rhodothermaceae,Rhodothermus	0.9985729507873239,0.9991063687077724,0.9991325336739585
DRR125122_contig-140_1_self_circular	DRR125122_contig-140_1_self_circular	1	189853	circular	Biwa	1	dsDNA,Myoviridae,T4virus	0.9975562181916015,0.9976970256795036,0.9978758106909263	Bacteria,Synechococcaceae,Synechococcus	0.99810726548009,0.998695339211805,0.9987248245007189
SRR6754102_k141_2154275_extended_partial	SRR6754102_k141_2154275_extended_partial	1	189550	high-quality	Rimov	1	dsDNA,Myoviridae,T4virus	0.995714974329081,0.9965589370693746,0.9963880516417697	Bacteria,Enterobacteriaceae,Bacillus	0.9972232526934764,0.9979019091399872,0.9981067547434143
SRR9302958_k141_586886_extended_partial	SRR9302958_k141_586886_extended_partial	1	188981	circular	Lugu	1	dsDNA,Myoviridae,Cp220virus	0.9979569759881622,0.9984016317857746,0.9984957102947416	Bacteria,Hominidae,Homo	0.9982130312956312,0.9989795834901107,0.9990110883883127
SRR7054680_k141_1329410_extended_circular	SRR7054680_k141_1329410_extended_circular	1	188928	circular	Zurich	1	dsDNA,Myoviridae,T4virus	0.9900987601730825,0.9937720386445712,0.9940710046781757	Bacteria,Enterobacteriaceae,Mycobacterium	0.9938655826986069,0.9971391529111522,0.9973412157106827
SRR9302960_k141_90607	SRR9302960_k141_90607	1	188777	high-quality	Fuxian	1	dsDNA,Myoviridae,T4virus	0.9993890545479004,0.9994325319949495,0.9996308153470611	Bacteria,Rhodothermaceae,Rhodothermus	0.9995390504755515,0.9997627889476008,0.999772290089414
ERR3687827_contig-140_23_extended_partial	ERR3687827_contig-140_23_extended_partial	1	188770	high-quality	Lake_Rotsee	1	dsDNA,Myoviridae,T4virus	0.9990163217720781,0.9991803239927048,0.999324998209179	Bacteria,Rhodothermaceae,Rhodothermus	0.9992154386518804,0.999566476352512,0.9995532548420886
SRR9214416_k141_14629_extended_partial	SRR9214416_k141_14629_extended_partial	1	188739	high-quality	Jiricka_pond	1	dsDNA,Myoviridae,T4virus	0.998754287828173,0.998865063989899,0.9991679569762124	Bacteria,Rhodothermaceae,Rhodothermus	0.9990291645289869,0.9993149508400543,0.9993277135973178
ERS4600532_contig-140_7_self_circular	ERS4600532_contig-140_7_self_circular,ERS4600537_contig-140_12_self_circular,ERS4600546_contig-140_11_self_circular,ERS4600534_contig-140_8_self_circular,ERS4600539_contig-140_11_self_circular,ERS4600535_contig-140_6_self_circular,ERS4600533_contig-140_7_self_circular,ERS4600538_contig-140_7_self_circular,ERS4600553_contig-140_6_self_circular,ERS4600536_contig-140_7_self_circular	10	187815	circular	Mekkojärvi	1	dsDNA,Myoviridae,T4virus	0.9979149384570545,0.9985608380871914,0.9985948942313521	Bacteria,Rhodothermaceae,Rhodothermus	0.9983187971111726,0.9989816284129762,0.9990024137250522
SRR9302957_k141_278309_extended_circular	SRR9302957_k141_278309_extended_circular	1	187083	circular	Lugu	1	dsDNA,Myoviridae,Vi1virus	0.9940965293814318,0.9944608817507018,0.9937293711187397	Bacteria,Enterobacteriaceae,Bacillus	0.9963676546035756,0.9973518248891652,0.9976556722538727
ERS4600401_contig-140_623_extended_partial	ERS4600401_contig-140_623_extended_partial	1	186986	circular	SAS2	1	dsDNA,Phycodnaviridae,Prasinovirus	0.9987795103468377,0.9983464612852835,0.9982560157812663	Bacteria,Hominidae,Aureococcus	0.9693594853782707,0.9887058910137909,0.9877145081574364
ERS4600459_contig-140_5_extended_partial	ERS4600459_contig-140_5_extended_partial	1	186590	high-quality	Lovojärvi	1	dsDNA,Myoviridae,T4virus	0.9973474317870995,0.9978814527811449,0.9978758106909263	Bacteria,Rhodothermaceae,Rhodothermus	0.9978957338490074,0.9985562844569503,0.9986402465339299
SRR9302958_k141_1109148_extended_partial	SRR9302958_k141_1109148_extended_partial	1	186413	high-quality	Lugu	1	dsDNA,Myoviridae,T4virus	0.998451617604197,0.998537193586981,0.9985948942313521	Bacteria,Rhodothermaceae,Rhodothermus	0.9986124156438692,0.9992433785397615,0.9992431356305287
SRR6754101_k141_1869192_self_circular	SRR6754086_k141_2586573_extended_partial,SRR6754101_k141_1869192_self_circular,SRR6754098_k141_1465116_self_circular,SRR6754088_k141_1145226_extended_partial,SRR6754100_NODE_49_length_163206_cov_10.603192	5	163096	circular	Rimov	1	dsDNA,Myoviridae,T4virus	0.9982974799901352,0.998266069984568,0.9981871380475091	Bacteria,Enterobacteriaceae,Synechococcus	0.998430877303761,0.9986789798288809,0.9987248245007189
SRR6475631_k141_2502672_extended_partial	SRR6475631_k141_2502672_extended_partial	1	185494	circular	Zurich	1	dsDNA,Myoviridae,T4virus	0.9990485505459274,0.9992197314930557,0.9993801003961847	Bacteria,Rhodothermaceae,Rhodothermus	0.9992170172461423,0.999566476352512,0.9995554235079037
SRR8894379_k141_2698468_extended_partial	SRR8894379_k141_2698468_extended_partial	1	185194	high-quality	Fuxian	1	dsDNA,Myoviridae,Bxz1virus	0.987011804138735,0.9924605570328989,0.9935888605418749	Bacteria,Mycobacteriaceae,Mycobacterium	0.9930305063341095,0.9964950022085167,0.9967968805910915
ERR2814753_NODE_7_length_184542_cov_79.337820_self_circular	ERR2814753_NODE_7_length_184542_cov_79.337820_self_circular	1	184415	circular	Soyang	1	dsDNA,Myoviridae,T4virus	0.9972801717373271,0.9967197196708055,0.9964183578446228	Bacteria,Enterobacteriaceae,Bacillus	0.9978183827301788,0.9980123349747247,0.9981067547434143
ERS4600483_contig-140_5_self_circular	ERS4600481_contig-140_15_extended_circular,ERS4600489_contig-140_24_extended_circular,ERS4600483_contig-140_5_self_circular	3	183198	circular	Loclat	1	dsDNA,Myoviridae,T4virus	0.9926658520727305,0.9911900592215915,0.9909659964403987	Bacteria,Synechococcaceae,Synechococcus	0.9946012076246102,0.9951330835800873,0.9954761631096933
ERS4600458_contig-140_11_self_circular	ERS4600458_contig-140_11_self_circular	1	182546	circular	Lovojärvi	1	dsDNA,Myoviridae,Bxz1virus	0.984125227002668,0.9897083372084042,0.9908309960822345	Bacteria,Mycobacteriaceae,Mycobacterium	0.9915624136706263,0.9957874588970504,0.9961376061832999
ERR3687828_contig-140_311_extended_partial	ERR3687828_contig-140_311_extended_partial	1	182392	high-quality	Lake_Rotsee	1	dsDNA,Myoviridae,Slashvirus	0.9972535479676254,0.9970397085736534,0.9969197877463757	Bacteria,Enterobacteriaceae,Synechococcus	0.9978262757014879,0.9983006690987616,0.9984385606131252
ERS4600333_contig-140_39_extended_partial	ERS4600333_contig-140_39_extended_partial,ERS4600334_contig-140_25_extended_partial	2	182384	high-quality	Alinen_Mustajärvi	1	dsDNA,Myoviridae,Bxz1virus	0.991994652826043,0.9943883719500565,0.9943354951758036	Bacteria,Enterobacteriaceae,Mycobacterium	0.9951963376613125,0.9971207486053626,0.9974778416570341
SRR6754087_k141_1822430_self_circular	SRR6754087_k141_1822430_self_circular	1	182057	circular	Rimov	1	dsDNA,Myoviridae,T4virus	0.9943865883460754,0.9937200207441081,0.9942115152550405	Bacteria,Enterobacteriaceae,Bacillus	0.9963392399068629,0.9971350630654212,0.9974778416570341
SRR6754088_k141_3360368_self_circular	SRR12053443_k141_1166017,SRR6475631_k141_901161_extended_partial,SRR6754088_k141_3360368_self_circular	3	88681	circular	Rimov,Baikal,Zurich	3	dsDNA,Myoviridae,T4virus	0.9979541734860884,0.998318087885031,0.9983221384056733	Bacteria,Bacillaceae,Bacillus	0.9982951181972454,0.9988343939666596,0.9988809684394064
ERR2814726_NODE_3_length_137990_cov_72.691099_extended_circular	ERR2814726_NODE_3_length_137990_cov_72.691099_extended_circular	1	181824	circular	Soyang	1	dsDNA,Myoviridae,T4virus	0.9981755711499226,0.9985734484873037,0.998641731090307	Bacteria,Rhodothermaceae,Rhodothermus	0.9984419274635936,0.9990470659446725,0.9990696423653205
SRR6754094_k141_2954654_extended_circular	SRR6754086_k141_2364341_extended_partial,SRR6754094_k141_2954654_extended_circular,SRR6754088_k141_2139850_extended_partial,SRR6754092_k141_2436141_extended_circular,SRR6754094_k141_3571460_extended_partial,SRR6754088_k141_3316431_extended_partial,SRR6754092_k141_1928111_extended_partial	7	122335	circular	Rimov	1	dsDNA,Podoviridae,Cba41virus	0.9991844718965092,0.999238647093224,0.9993553044120321	Bacteria,Flavobacteriaceae,Cellulophaga	0.9993464619756107,0.9996462283442669,0.9996400014746928
SRR6754087_k141_1327829_extended_partial	SRR6754087_k141_1327829_extended_partial	1	181026	high-quality	Rimov	1	dsDNA,Myoviridae,T4virus	0.9939648117839607,0.9960166898645485,0.9961951939872493	Bacteria,Enterobacteriaceae,Synechococcus	0.9962824105134378,0.9976810574705122,0.9978812134986434
SRR6754089_k141_3223011_self_circular	SRR6754089_k141_3223011_self_circular	1	180681	circular	Rimov	1	dsDNA,Myoviridae,Rslunavirus	0.9598107190099321,0.9668046980045618,0.9719970685636513	Bacteria,Bacillaceae,Bacillus	0.9748040569872528,0.9725653148363244,0.9754810642944354
SRR6754089_k141_1574806_extended_partial	SRR6754089_k141_1574806_extended_partial	1	180200	high-quality	Rimov	1	dsDNA,Myoviridae,T4virus	0.997413290585835,0.9975141748778762,0.9974377483042302	Bacteria,Synechococcaceae,Synechococcus	0.9979083626031019,0.9982515909499894,0.9983800066361174
ERS4600453_contig-140_4_extended_circular	ERS4600453_contig-140_4_extended_circular	1	179873	circular	Lovojärvi	1	dsDNA,Myoviridae,Slashvirus	0.9904056341501692,0.9927663592356206,0.9942611072233457	Bacteria,Bacillaceae,Bacillus	0.9946706657721299,0.9968344594041912,0.9971829031061801
SRR6754094_k141_4380489	SRR6754094_k141_4380489,SRR6754086_k141_2867075	2	178968	high-quality	Rimov	1	dsDNA,Myoviridae,T4virus	0.9985875389547788,0.9988146223894502,0.999068773039602	Bacteria,Rhodothermaceae,Rhodothermus	0.9988081613323335,0.999349714528768,0.9993212075998725
SRR5896115_k141_1419274_extended_partial	SRR5896115_k141_1419274_extended_partial,SRR5896114_k141_1116738_extended_partial	2	178800	high-quality	Baikal	1	dsDNA,Phycodnaviridae,Prasinovirus	0.9988019303634285,0.9984378866860972,0.9984075467955323	Bacteria,Hominidae,Aureococcus	0.9780528039780575,0.9931740474749292,0.9939537597074903
SRR6754098_k141_1067860_extended_partial	SRR6754098_k141_1067860_extended_partial,SRR6754096_k141_2260256	2	178081	high-quality	Rimov	1	dsDNA,Myoviridae,Cr3virus	0.9951726901777908,0.995983587564254,0.9959224381615707	Bacteria,Bacillaceae,Bacillus	0.996405540865859,0.9974806550296923,0.9976795275778388
SRR6754086_k141_1259283_extended_circular	SRR6754086_k141_1259283_extended_circular,SRR6754088_k141_2706044_extended_circular,SRR6754092_k141_1542375_extended_circular	3	177387	circular	Rimov	1	dsDNA,Myoviridae,T4virus	0.997396475573392,0.9969955721732606,0.99677101184146	Bacteria,Enterobacteriaceae,Bacillus	0.9977647105252773,0.9982515909499894,0.9983865126335627
ERR2814752_NODE_6_length_177338_cov_6.241198_self_circular	ERR2814752_NODE_6_length_177338_cov_6.241198_self_circular	1	177097	circular	Soyang	1	dsDNA,Myoviridae,T4virus	0.9880459274039862,0.988831914400604,0.9864283313404709	Bacteria,Synechococcaceae,Synechococcus	0.9911772366707448,0.9936811883455756,0.9942205056027481
SRR6754094_k141_2893716_extended_circular	SRR6754094_k141_2893716_extended_circular,SRR6754092_k141_1702631_extended_partial,SRR6754088_k141_372700_extended_partial,SRR6754086_k141_1669856_extended_partial	4	177064	circular	Rimov	1	dsDNA,Myoviridae,Slashvirus	0.997641694504854,0.9976213632788301,0.9974570340696822	Bacteria,Bacillaceae,Bacillus	0.997898891037531,0.9983988253963061,0.9985339819089898
SRR9302958_k141_1174899_extended_partial	SRR9302958_k141_1174899_extended_partial	1	176717	circular	Lugu	1	dsDNA,Myoviridae,T4virus	0.9990709705625183,0.9992228840930837,0.9993387737559304	Bacteria,Rhodothermaceae,Rhodothermus	0.999235960377284,0.9995521618924534,0.9995445801788282
DRR125121_contig-140_42_extended_partial	DRR125121_contig-140_42_extended_partial	1	175957	high-quality	Biwa	1	dsDNA,Myoviridae,T4virus	0.9986337802389974,0.9974558517773571,0.9976416263961516	Bacteria,Synechococcaceae,Synechococcus	0.9986660878487706,0.9992924566885337,0.9993038582733517
ERS4600330_contig-140_4_self_circular	ERS4600330_contig-140_4_self_circular	1	175864	circular	Alinen_Mustajärvi	1	dsDNA,Myoviridae,T4virus	0.9987318678115822,0.9988571824898289,0.999126630335958	Bacteria,Rhodothermaceae,Rhodothermus	0.9990165357748925,0.9993333551458439,0.9993472315896538
ERS4600489_contig-140_80_extended_partial	ERS4600489_contig-140_80_extended_partial	1	175705	high-quality	Loclat	1	dsDNA,Myoviridae,Bxz1virus	0.9852083940542116,0.9918978179278906,0.9915555898413608	Bacteria,Enterobacteriaceae,Mycobacterium	0.9917439520107344,0.9963068693048899,0.9963349547724745
SRR6754101_k141_2115465_extended_circular	SRR6754101_k141_2115465_extended_circular	1	175543	circular	Rimov	1	dsDNA,Myoviridae,Bxz1virus	0.9897358361545188,0.9931241793388051,0.9941371273025826	Bacteria,Enterobacteriaceae,Mycobacterium	0.9914803267690122,0.9968998969358875,0.9972089270959613
SRR8894380_k141_4402326_extended_partial	SRR8894380_k141_4402326_extended_partial	1	174686	high-quality	Fuxian	1	dsDNA,Myoviridae,T4virus	0.9990527542990382,0.9991566794924944,0.999278161350224	Bacteria,Rhodothermaceae,Rhodothermus	0.9991633450412408,0.9995194431266052,0.9995120501916016
SRR6754087_k141_1664912_self_circular	SRR6754087_k141_1664912_self_circular	1	174543	circular	Rimov	1	dsDNA,Myoviridae,T4virus	0.9985875389547788,0.9988477246897447,0.9991514263201107	Bacteria,Rhodothermaceae,Rhodothermus	0.9988728836970677,0.9993354000687094,0.9993472315896538
ERS4600569_NODE_75_length_120721_cov_10.771083_extended_partial	ERS4600569_NODE_75_length_120721_cov_10.771083_extended_partial	1	174325	circular	Björntjärnan	1	dsDNA,Myoviridae,Muvirus	0.985143936506513,0.9810796709316091,0.9790115769694899	Bacteria,Enterobacteriaceae,Bacillus	0.991780259678756,0.9428341812946816,0.9422267426856323
SRR9214416_k141_24367_extended_partial	SRR9214416_k141_24367_extended_partial	1	173963	high-quality	Jiricka_pond	1	dsDNA,Myoviridae,M12virus	0.9975253906687891,0.9977852984802892,0.9975369322408406	Bacteria,Enterobacteriaceae,Sinorhizobium	0.9980330715497849,0.9982270518756032,0.9983756693044872
SRR9302959_k141_2963624_extended_circular	SRR9302959_k141_2963624_extended_circular	1	173691	circular	Fuxian	1	dsDNA,Myoviridae,T4virus	0.9988159428737977,0.9978719949810607,0.9980300968145426	Bacteria,Synechococcaceae,Synechococcus	0.9988050041438099,0.9990184370245554,0.9990349437122787
ERS4600529_contig-140_337_extended_partial	ERS4600529_contig-140_337_extended_partial	1	173502	high-quality	Mekkojärvi	1	dsDNA,Myoviridae,M12virus	0.997299789251844,0.9972966454759401,0.9967682567321097	Bacteria,Enterobacteriaceae,Synechococcus	0.9978799479063893,0.9981288955780588,0.9982086820367242
ERS4600505_contig-140_17_self_circular	ERS4600505_contig-140_17_self_circular,ERS4600506_contig-140_16_self_circular,ERS4600507_contig-140_7_self_circular	3	173228	circular	Mekkojärvi	1	dsDNA,Myoviridae,T4virus	0.9984053763199785,0.9983811398855922,0.9980135661584408	Bacteria,Enterobacteriaceae,Clostridium	0.9985666364102767,0.9986319466029742,0.9986792825186017
SRR6754102_k141_446500_extended_circular	SRR6754102_k141_446500_extended_circular	1	173004	circular	Rimov	1	dsDNA,Myoviridae,T4virus	0.9991017980853306,0.9992197314930557,0.9993497941933316	Bacteria,Rhodothermaceae,Rhodothermus	0.9992201744346659,0.999566476352512,0.9995532548420886
ERR2814753_NODE_37_length_99098_cov_23.955472_extended_partial	ERR2814753_NODE_37_length_99098_cov_23.955472_extended_partial	1	172760	high-quality	Soyang	1	dsDNA,Myoviridae,T4virus	0.9988159428737977,0.9990479147915264,0.999258875584772	Bacteria,Rhodothermaceae,Rhodothermus	0.9991128300248628,0.9995030837436812,0.999499038196711
SRR6754098_k141_1077800_extended_circular	SRR6754098_k141_1077800_extended_circular	1	172627	circular	Rimov	1	dsDNA,Myoviridae,T4virus	0.997509976907383,0.9976513129790967,0.9975286669127897	Bacteria,Bacillaceae,Bacillus	0.9978704763408185,0.9985092512310436,0.9986142225441487
ERS4600478_contig-140_537_extended_circular	ERS4600477_contig-140_2717_extended_partial,ERS4600478_contig-140_537_extended_circular,ERS4600474_contig-140_1096_extended_partial	3	171922	circular	Loclat	1	dsDNA,Myoviridae,T4virus	0.9752188754119678,0.9774116207989634,0.9829293424656025	Bacteria,Enterobacteriaceae,Mycobacterium	0.9864761829590749,0.9921474961964435,0.9928368968127118
SRR9214416_k141_744169_extended_partial	SRR9214416_k141_744169_extended_partial	1	172279	circular	Jiricka_pond	1	dsDNA,Myoviridae,T4virus	0.9977061520525525,0.9982487306844137,0.9982973424215207	Bacteria,Enterobacteriaceae,Synechococcus	0.9981719878448242,0.998820079506601,0.9988375951231043
SRR6754100_NODE_43_length_172210_cov_11.235183	SRR6754100_NODE_43_length_172210_cov_11.235183	1	172210	high-quality	Rimov	1	dsDNA,Myoviridae,Slashvirus	0.9982960787390983,0.998374834685536,0.9983882610300803	Bacteria,Synechococcaceae,Synechococcus	0.9984498204349027,0.9989468647242626,0.9989720524036407
SRR9302961_k141_2581701_extended_partial	SRR9302961_k141_2581701_extended_partial	1	172150	high-quality	Erhai	1	dsDNA,Myoviridae,T4virus	0.9919245902741968,0.9920128878289147,0.9916602839966718	Bacteria,Bacillaceae,Synechococcus	0.9939050475551522,0.9960901074811458,0.9963956774152973
SRR8894380_k141_6270277_self_circular	SRR8894380_k141_6270277_self_circular	1	171952	circular	Fuxian	1	dsDNA,Myoviridae,M12virus	0.9969368652332803,0.9966598202702724,0.9961125407067406	Bacteria,Enterobacteriaceae,Synechococcus	0.9974253127589882,0.9976299343988745,0.9978573581746774
SRR8894380_k141_4906784_extended_circular	SRR8894380_k141_4906784_extended_circular	1	171802	circular	Fuxian	1	dsDNA,Myoviridae,Nit1virus	0.9895760935363093,0.9935513566426071,0.9941922294895884	Bacteria,Enterobacteriaceae,Bacillus	0.9937061446781641,0.9970921196852455,0.9974301310091019
SRR6754087_k141_731235_extended_circular	SRR6754087_k141_731235_extended_circular	1	171630	circular	Rimov	1	dsDNA,Myoviridae,T4virus	0.9974034818285765,0.9968316369718015,0.996514786671883	Bacteria,Enterobacteriaceae,Synechococcus	0.997898891037531,0.9980123349747247,0.9981175980724898
SRR9214416_k141_751660_extended_circular	SRR9214416_k141_751660_extended_circular	1	171369	circular	Jiricka_pond	1	dsDNA,Myoviridae,T4virus	0.9980606685648947,0.9983417323852414,0.9982312197971137	Bacteria,Enterobacteriaceae,Synechococcus	0.9982998539800307,0.9988630228867768,0.9988983177659272
SRR8894380_k141_3587769_extended_partial	SRR8894380_k141_3587769_extended_partial	1	171009	circular	Fuxian	1	dsDNA,Myoviridae,T4virus	0.987467210725736,0.9902080243128514,0.990588546459409	Bacteria,Enterobacteriaceae,Synechococcus	0.9905079127037373,0.9941576553732393,0.9946846000871804
SRR9214414_k141_928624_extended_circular	SRR9214414_k141_928624_extended_circular	1	170783	circular	Jiricka_pond	1	dsDNA,Myoviridae,Bxz1virus	0.9964254086048023,0.9972083726751545,0.9967655016227595	Bacteria,Mycobacteriaceae,Mycobacterium	0.9973448044516359,0.9980143798975902,0.9981544653913466
SRR12053441_k141_1292753_extended_circular	SRR12053441_k141_1292753_extended_circular,SRR8561390_k141_355870_extended_circular,SRR12053440_k141_1053130_extended_circular	3	170458	circular	Baikal	1	dsDNA,Myoviridae,Bxz1virus	0.9831625675403,0.9882786330956799,0.9896600746083613	Bacteria,Enterobacteriaceae,Cronobacter	0.9910856782035598,0.9942721710537079,0.9948971293370605
SRR9214416_k141_608313_extended_partial	SRR9214416_k141_608313_extended_partial	1	170412	circular	Jiricka_pond	1	dsDNA,Myoviridae,T4virus	0.9984446113490124,0.998483599386504,0.9984929551853913	Bacteria,Enterobacteriaceae,Synechococcus	0.9985508504676586,0.998920280727011,0.9989633777403804
SRR8894380_k141_2561270_extended_partial	SRR8894380_k141_2561270_extended_partial	1	170161	high-quality	Fuxian	1	dsDNA,Myoviridae,T4virus	0.9983647400399076,0.9987846726891836,0.9990054055245453	Bacteria,Rhodothermaceae,Rhodothermus	0.9985603220332294,0.9991206831678309,0.9990869916918412
ERS4600551_contig-140_2159_extended_partial	ERS4600551_contig-140_2159_extended_partial	1	169503	high-quality	Mekkojärvi	1	dsDNA,Myoviridae,T4virus	0.997509976907383,0.9981825260838245,0.9978950964563783	Bacteria,Enterobacteriaceae,Synechococcus	0.9980630648407594,0.9984274543164232,0.9985578372329559
SRR6754087_k141_2581339_extended_circular	SRR6754087_k141_2581339_extended_circular	1	169214	circular	Rimov	1	dsDNA,Myoviridae,Chlorovirus	0.985334506647535,0.9833653059519513,0.9864531273246235	Bacteria,Bacillaceae,Bacillus	0.9906026283594459,0.9933887643758077,0.9942074936078575
ERS4600334_contig-140_29_self_circular	ERS4600334_contig-140_29_self_circular	1	168454	circular	Alinen_Mustajärvi	1	dsDNA,Myoviridae,Nit1virus	0.9972171154406654,0.9967165670707775,0.9957102947415983	Bacteria,Bacillaceae,Bacillus	0.9975326571687911,0.9976013054787574,0.9978226595216357
ERR3687822_contig-140_1765_extended_partial	ERR3687822_contig-140_1765_extended_partial	1	168412	circular	Lake_Rotsee	1	dsDNA,Myoviridae,Slashvirus	0.9981755711499226,0.9983007485848766,0.9982697913280179	Bacteria,Bacillaceae,Bacillus	0.9983677335332886,0.9988487084267181,0.9988874744368517
SRR6754096_k141_2186106	SRR6754096_k141_2186106	1	168202	high-quality	Rimov	1	dsDNA,Myoviridae,Bxz1virus	0.9785160191018542,0.9883810925965917,0.9898942589031359	Bacteria,Enterobacteriaceae,Mycobacterium	0.9866861359958956,0.9943887316570419,0.9947062867453315
SRR6754089_k141_1523537_extended_partial	SRR6754089_k141_1523537_extended_partial,SRR6754099_k141_1041732_extended_partial	2	167758	circular	Rimov	1	dsDNA,Myoviridae,M12virus	0.9979303522184606,0.9981399659834457,0.9981403011885541	Bacteria,Enterobacteriaceae,Synechococcus	0.9982951181972454,0.9987444173605772,0.998768197817021
ERS4600504_contig-140_15_self_circular	ERS4600511_contig-140_1432_extended_circular,ERS4600504_contig-140_15_self_circular	2	167585	circular	Mekkojärvi	1	dsDNA,Myoviridae,M12virus	0.9971554603950407,0.9978562319809204,0.9976609121616037	Bacteria,Enterobacteriaceae,Sinorhizobium	0.9979209913571964,0.9981881983411586,0.9983496453147059
SRR9214414_k141_383216_extended_circular	SRR9214414_k141_383216_extended_circular	1	167291	circular	Jiricka_pond	1	dsDNA,Myoviridae,T4virus	0.9985048651436002,0.9985103964867426,0.9985342818256456	Bacteria,Enterobacteriaceae,Synechococcus	0.9986092584553455,0.9989836733358418,0.999017594385758
ERR3687826_contig-140_1931_extended_partial	ERR3687826_contig-140_1931_extended_partial	1	167127	high-quality	Lake_Rotsee	1	dsDNA,Myoviridae,T4virus	0.9980522610586732,0.9980564220827022,0.9979612190807853	Bacteria,Synechococcaceae,Synechococcus	0.998181459410395,0.9986053626057225,0.9986749451869715
SRR8894379_k141_3008779	SRR8894379_k141_3008779	1	166712	high-quality	Fuxian	1	dsDNA,Myoviridae,T4virus	0.9964127973454701,0.9970838449740462,0.9964899906877304	Bacteria,Synechococcaceae,Synechococcus	0.99724377441888,0.9974765651839612,0.9976773589120237
SRR6754087_k141_1792729_extended_partial	SRR6754087_k141_1792729_extended_partial	1	166672	high-quality	Rimov	1	dsDNA,Myoviridae,T4virus	0.9986576015066251,0.9989407263905725,0.9991982631790656	Bacteria,Rhodothermaceae,Rhodothermus	0.998879198074115,0.9994192419061952,0.9993689182478047
SRR9302961_k141_363983_extended_partial	SRR9302961_k141_363983_extended_partial	1	166499	high-quality	Erhai	1	dsDNA,Myoviridae,T4virus	0.9966790350424859,0.9975094459778341,0.9972807070712637	Bacteria,Synechococcaceae,Synechococcus	0.9976384229843325,0.9982045577240827,0.9983388019856304
SRR6754100_NODE_922_length_43398_cov_8.765316_extended_partial	SRR6754100_NODE_922_length_43398_cov_8.765316_extended_partial	1	166440	high-quality	Rimov	1	dsDNA,Myoviridae,T4virus	0.9987753065937269,0.9987941304892678,0.9991100996798563	Bacteria,Enterobacteriaceae,Synechococcus	0.999011799992107,0.9993313102229784,0.9993320509289481
ERS4600506_contig-140_1043_extended_circular	ERS4600506_contig-140_1043_extended_circular	1	166327	circular	Mekkojärvi	1	dsDNA,Myoviridae,T4virus	0.9982568437100643,0.9983669531854659,0.9982505055625658	Bacteria,Enterobacteriaceae,Synechococcus	0.9983440546193615,0.9987771361264253,0.9987768724802814
SRR9214416_k141_1064188_self_circular	SRR9214416_k141_1064188_self_circular	1	166153	circular	Jiricka_pond	1	dsDNA,Myoviridae,T4virus	0.9983675425419815,0.9984568022862655,0.9984764245292895	Bacteria,Enterobacteriaceae,Synechococcus	0.9984340344922846,0.9987362376691151,0.9987638604853908
ERS4600386_contig-140_141_extended_partial	ERS4600386_contig-140_141_extended_partial,ERS4600385_contig-140_697_extended_partial	2	165518	high-quality	SAS2	1	dsDNA,Siphoviridae,T4virus	0.9935864740039908,0.992682815334877,0.9916106920283666	Bacteria,Enterobacteriaceae,Bacillus	0.9961876948577292,0.9958304022772261,0.9961679675047114
SRR9214415_k141_1141232_extended_circular	SRR9214415_k141_1141232_extended_circular	1	165216	circular	Jiricka_pond	1	dsDNA,Myoviridae,T4virus	0.9972227204448131,0.9975315141780304,0.9973165234928174	Bacteria,Enterobacteriaceae,Synechococcus	0.9979225699514582,0.9982086475698136,0.9983800066361174
SRR6754102_k141_624376_extended_partial	SRR6754102_k141_624376_extended_partial	1	165192	high-quality	Rimov	1	dsDNA,Myoviridae,T4virus	0.9986800215232159,0.9987878252892116,0.9990136708525962	Bacteria,Enterobacteriaceae,Synechococcus	0.9988286830577371,0.9992924566885337,0.9993038582733517
ERS4600549_contig-140_11_extended_partial	ERS4600549_contig-140_11_extended_partial	1	164892	circular	Mekkojärvi	1	dsDNA,Myoviridae,M12virus	0.9989336479608995,0.9987957067892818,0.9988566296196296	Bacteria,Enterobacteriaceae,Synechococcus	0.9990717865740558,0.9992617828455511,0.999227954969823
ERS4600513_contig-140_33_extended_circular	ERS4600515_contig-140_71_extended_partial,ERS4600513_contig-140_33_extended_circular,ERS4600517_contig-140_104_extended_circular	3	164590	circular	Mekkojärvi	1	dsDNA,Myoviridae,T4virus	0.9969354639822433,0.9968426710718997,0.9964624395942275	Bacteria,Enterobacteriaceae,Synechococcus	0.9976542089269506,0.9979203134457768,0.99801567077918
SRR6754088_k141_2834608_extended_circular	SRR6754094_k141_1466918_extended_partial,SRR6754088_k141_2834608_extended_circular	2	164353	circular	Rimov	1	dsDNA,Myoviridae,T4virus	0.9953016052731879,0.9970649293738779,0.9970134614642855	Bacteria,Hominidae,Homo	0.9969990923082994,0.9981472998838484,0.9982954286693283
SRR8894380_k141_5503885_extended_partial	SRR8894380_k141_5503885_extended_partial	1	164564	high-quality	Fuxian	1	dsDNA,Myoviridae,Bxz1virus	0.9862481223236105,0.9903892988144648,0.9915555898413608	Bacteria,Enterobacteriaceae,Mycobacterium	0.9915845139902917,0.9961596348585732,0.9964000147469275
ERS4600326_contig-140_801_extended_partial	ERS4600326_contig-140_801_extended_partial	1	164541	circular	Alinen_Mustajärvi	1	dsDNA,Myoviridae,Bxz1virus	0.972158543147322,0.9843158148604108,0.9869573123357266	Bacteria,Enterobacteriaceae,Mycobacterium	0.9842645723982794,0.9929777348798403,0.9926894275372848
SRR9214414_k141_1682430_extended_partial	SRR9214414_k141_1682430_extended_partial	1	164246	high-quality	Jiricka_pond	1	dsDNA,Myoviridae,M12virus	0.9981727686478488,0.9983023248848907,0.9981044847670004	Bacteria,Enterobacteriaceae,Synechococcus	0.9983109041398635,0.9988568881181802,0.9988853057710366
ERS4600468_contig-140_5_self_circular	ERS4600472_contig-140_711_extended_partial,ERS4600468_contig-140_5_self_circular,ERS4600470_contig-140_4_extended_partial	3	163734	circular	Loclat	1	dsDNA,Myoviridae,M12virus	0.9975323969239738,0.9974637332774272,0.9972862172899642	Bacteria,Enterobacteriaceae,Sinorhizobium	0.9979967638817633,0.9983252081731477,0.9984298859498648
SRR7054681_k141_547729_extended_partial	SRR7054681_k141_547729_extended_partial	1	164099	high-quality	Zurich	1	dsDNA,Siphoviridae,T4virus	0.9931422774252853,0.9942354708486957,0.9935861054325246	Bacteria,Streptomycetaceae,Streptomyces	0.9960456213741663,0.9968917172444255,0.9971937464352556
SRR8894379_k141_116041_extended_partial	SRR8894379_k141_116041_extended_partial	1	164067	circular	Fuxian	1	dsDNA,Myoviridae,T4virus	0.9981755711499226,0.9977979088804014,0.99734131947697	Bacteria,Enterobacteriaceae,Bacillus	0.9982288172382493,0.9982311417213343,0.9983214526591095
SRR6754086_k141_3061110_extended_partial	SRR6754086_k141_3061110_extended_partial	1	164033	high-quality	Rimov	1	dsDNA,Myoviridae,M12virus	0.998451617604197,0.9987815200891556,0.9991100996798563	Bacteria,Enterobacteriaceae,Synechococcus	0.9986139942381309,0.9992904117656682,0.999290846278461
SRR6754089_k141_1048663_extended_circular	SRR6754087_k141_39309_extended_partial,SRR6754089_k141_1048663_extended_circular	2	163454	circular	Rimov	1	dsDNA,Myoviridae,T4virus	0.9978560859135036,0.998266069984568,0.9981871380475091	Bacteria,Enterobacteriaceae,Synechococcus	0.9982082955128458,0.998824169352332,0.9988571131154402
SRR6754087_k141_3574764_self_circular	SRR6754087_k141_3574764_self_circular	1	163770	circular	Rimov	1	dsDNA,Myoviridae,Cr3virus	0.9899880613411653,0.9950772150561872,0.995004986747924	Bacteria,Bacillaceae,Bacillus	0.9941623584198271,0.997315016277586,0.9975754316187139
SRR6754094_k141_3201406_extended_partial	SRR6754094_k141_3201406_extended_partial	1	163649	high-quality	Rimov	1	dsDNA,Myoviridae,T4virus	0.9974861556397552,0.9980627272827582,0.9980548927986952	Bacteria,Rhodothermaceae,Rhodothermus	0.9980993725087809,0.9985358352282951,0.9986315718706694
SRR6754096_k141_452836	SRR6754096_k141_452836	1	163332	high-quality	Rimov	1	dsDNA,Myoviridae,T4virus	0.9810214559558774,0.987802590491443,0.9895305844688975	Bacteria,Enterobacteriaceae,Mycobacterium	0.9899317257981767,0.9951923863431872,0.9953221878368209
ERS4600552_contig-140_185_extended_circular	ERS4600552_contig-140_185_extended_circular	1	162951	circular	Mekkojärvi	1	dsDNA,Myoviridae,T4virus	0.9983899625585723,0.9982991722848626,0.9980493825799946	Bacteria,Enterobacteriaceae,Synechococcus	0.9984419274635936,0.9988343939666596,0.9987725351486512
SRR6754096_k141_879496_extended_circular	SRR6754096_k141_879496_extended_circular	1	162663	circular	Rimov	1	dsDNA,Myoviridae,M12virus	0.9971078178597852,0.9971863044749582,0.9970961147447942	Bacteria,Enterobacteriaceae,Synechococcus	0.9977726034965863,0.9982352315670653,0.9983496453147059
SRR6475631_k141_5925211_extended_partial	SRR6475631_k141_5925211_extended_partial	1	162571	high-quality	Zurich	1	dsDNA,Myoviridae,T4virus	0.9975211869156784,0.9980185908823654,0.9977215245673101	Bacteria,Enterobacteriaceae,Vibrio	0.9980725364063302,0.9985808235313364,0.998664101857896
ERR2814726_NODE_694_length_11347_cov_31.167023_extended_partial	ERR2814726_NODE_694_length_11347_cov_31.167023_extended_partial	1	162408	high-quality	Soyang	1	dsDNA,Myoviridae,T4virus	0.9989098266932718,0.9991093904920736,0.9992698960221731	Bacteria,Rhodothermaceae,Rhodothermus	0.9991459805043609,0.9995092185122777,0.9995033755283412
ERR2814752_NODE_1428_length_10306_cov_8.910797_extended_partial	ERR2814752_NODE_1428_length_10306_cov_8.910797_extended_partial	1	162404	high-quality	Soyang	1	dsDNA,Myoviridae,T4virus	0.9989910992534135,0.998811469789422,0.9990384668367488	Bacteria,Enterobacteriaceae,Synechococcus	0.999085993922412,0.9992924566885337,0.9992973522759063
SRR9302960_k141_2277706_self_circular	SRR9302960_k141_2277706_self_circular	1	162306	circular	Fuxian	1	dsDNA,Myoviridae,T4virus	0.9992265094276169,0.9993316487940517,0.9994985700982472	Bacteria,Rhodothermaceae,Rhodothermus	0.999360669323967,0.9996584978814599,0.9996508448037683
SRR4198666_contig-140_81_self_circular	SRR4198666_contig-140_81_self_circular	1	162232	circular	Tous	1	dsDNA,Myoviridae,T4virus	0.9983535300316122,0.9986238900877527,0.9987602007923695	Bacteria,Rhodothermaceae,Rhodothermus	0.9985508504676586,0.9990920542477137,0.9991086783499923
SRR6754089_k141_1389682_extended_circular	SRR6754089_k141_1389682_extended_circular,SRR6754102_k141_1353862_extended_circular	2	162219	circular	Rimov	1	dsDNA,Myoviridae,T4virus	0.9980662735690424,0.9984457681861674,0.9985149960601937	Bacteria,Enterobacteriaceae,Synechococcus	0.9982682820947946,0.9989039213440869,0.9989373537505991
SRR9214416_k141_915998_extended_circular	SRR9214416_k141_915998_extended_circular	1	162113	circular	Jiricka_pond	1	dsDNA,Myoviridae,M12virus	0.9968597964262493,0.9972083726751545,0.9968564202313189	Bacteria,Enterobacteriaceae,Synechococcus	0.9977094597261139,0.9979939306689352,0.9981544653913466
SRR9302959_k141_2352149_extended_partial	SRR9302959_k141_2352149_extended_partial	1	162106	circular	Fuxian	1	dsDNA,Myoviridae,T4virus	0.9980662735690424,0.9982077468840489,0.9979860150649379	Bacteria,Enterobacteriaceae,Synechococcus	0.9982193456726784,0.9987014739804014,0.9987139811716433
ERS4600332_contig-140_4_self_circular	ERS4600338_contig-140_2557_extended_partial,ERS4600333_contig-140_205_extended_partial,ERS4600332_contig-140_4_self_circular,ERS4600330_contig-140_36_extended_partial,ERS4600329_contig-140_10_extended_partial,ERS4600339_contig-140_89,ERS4600336_contig-140_74,ERS4600334_contig-140_54,ERS4600331_contig-140_4_extended_partial,ERS4600328_contig-140_6	10	127851	circular	Alinen_Mustajärvi	1	dsDNA,Siphoviridae,Phic31virus	0.9994549133466358,0.9995223810957492,0.9996859175340669	Bacteria,Mycobacteriaceae,Mycobacterium	0.9996258731599511,0.999787328021987,0.9998004827450104
SRR9214415_k141_53276_extended_partial	SRR9214415_k141_53276_extended_partial	1	161822	high-quality	Jiricka_pond	1	dsDNA,Myoviridae,M12virus	0.9978238571396543,0.9966251416699637,0.9966139706084934	Bacteria,Enterobacteriaceae,Sinorhizobium	0.9981577804964679,0.9981616143439069,0.9982975973351434
SRR6754086_k141_2824674_extended_partial	SRR6754086_k141_2824674_extended_partial	1	161457	high-quality	Rimov	1	dsDNA,Myoviridae,T4virus	0.9984474138510863,0.9986191611877105,0.9987574456830192	Bacteria,Enterobacteriaceae,Synechococcus	0.9985208571766842,0.9990286616388829,0.9990522930387996
SRR9214414_k141_1651227_extended_circular	SRR9214414_k141_1651227_extended_circular	1	161338	circular	Jiricka_pond	1	dsDNA,Myoviridae,T4virus	0.9980284397910455,0.9983102063849608,0.9983083628589219	Bacteria,Synechococcaceae,Synechococcus	0.9983361616480524,0.9988487084267181,0.9988506071179949
SRR6754094_k141_2546859_extended_circular	SRR6754094_k141_2546859_extended_circular	1	161337	circular	Rimov	1	dsDNA,Myoviridae,M12virus	0.9981727686478488,0.9985088201867285,0.9984461183264364	Bacteria,Enterobacteriaceae,Synechococcus	0.9983172185169107,0.9987894056636184,0.9988115711333231
ERR3687824_contig-140_814_extended_partial	ERR3687824_contig-140_814_extended_partial	1	161330	circular	Lake_Rotsee	1	dsDNA,Myoviridae,M12virus	0.9973067955070287,0.9970444374736955,0.9967241749825051	Bacteria,Enterobacteriaceae,Synechococcus	0.9979841351276688,0.9979387177515664,0.9980720560903726
SRR9214414_k141_675058_extended_circular	SRR9214414_k141_675058_extended_circular,SRR9214415_k141_1163378_extended_circular	2	161139	circular	Jiricka_pond	1	dsDNA,Myoviridae,T4virus	0.9985328901643388,0.9983102063849608,0.9980796887828478	Bacteria,Enterobacteriaceae,Synechococcus	0.9985729507873239,0.9986871595203429,0.9986901258476772
SRR6754086_k141_3040455_self_circular	SRR6754097_k141_355499_extended_circular,SRR6754086_k141_3040455_self_circular,SRR6754096_k141_2613867_self_circular,SRR6754092_k141_2239229_self_circular,SRR6754088_k141_3231826_self_circular	5	160949	circular	Rimov	1	dsDNA,Myoviridae,T4virus	0.9985342914153756,0.9985624143872055,0.9986665270744596	Bacteria,Enterobacteriaceae,Synechococcus	0.998588736729942,0.9990572905590002,0.9990544617046146
ERS4600458_contig-140_17_self_circular	ERS4600458_contig-140_17_self_circular	1	160922	circular	Lovojärvi	1	dsDNA,Myoviridae,Bxz1virus	0.9673088133085218,0.9856068045719005,0.9885442553214937	Bacteria,Enterobacteriaceae,Mycobacterium	0.9820182327637239,0.9924542346262699,0.9933942439271936
ERR2814751_NODE_3_length_160798_cov_32.483696_self_circular	ERR2814751_NODE_3_length_160798_cov_32.483696_self_circular	1	160671	circular	Soyang	1	dsDNA,Myoviridae,T4virus	0.9991466381185122,0.9992575626933923,0.9994048963803374	Bacteria,Rhodothermaceae,Rhodothermus	0.9993054185248037,0.9995930603497636,0.9995836161635
ERS4600331_contig-140_763_extended_partial	ERS4600331_contig-140_763_extended_partial	1	160580	high-quality	Alinen_Mustajärvi	1	dsDNA,Myoviridae,Bxz1virus	0.9922847117906868,0.9942780309490745,0.9909384453468958	Bacteria,Bacillaceae,Bacillus	0.9948427325466672,0.9966872249578745,0.9968727838946202
SRR9214416_k141_362226_extended_circular	SRR9214416_k141_362226_extended_circular	1	160482	circular	Jiricka_pond	1	dsDNA,Myoviridae,T4virus	0.9982092011748088,0.9983054774849187,0.9983083628589219	Bacteria,Enterobacteriaceae,Synechococcus	0.9983614191562413,0.9987362376691151,0.9987486798246851
SRR6754092_k141_2943850_extended_partial	SRR6754092_k141_2943850_extended_partial	1	160369	high-quality	Rimov	1	dsDNA,Myoviridae,T4virus	0.9976907382911463,0.997887757981201,0.997264176415162	Bacteria,Enterobacteriaceae,Synechococcus	0.9980678006235447,0.9981616143439069,0.9983388019856304
ERR3687828_contig-140_328_extended_partial	ERR3687828_contig-140_328_extended_partial	1	160229	circular	Lake_Rotsee	1	dsDNA,Myoviridae,T4virus	0.9977706096002511,0.9979539625817903,0.9977270347860107	Bacteria,Synechococcaceae,Synechococcus	0.9980172856071668,0.9984274543164232,0.9985534999013257
ERS4600511_contig-140_626_extended_partial	ERS4600511_contig-140_626_extended_partial	1	160111	high-quality	Mekkojärvi	1	dsDNA,Myoviridae,T4virus	0.9979709884985315,0.9983259693851011,0.9984130570142329	Bacteria,Synechococcaceae,Synechococcus	0.9982461817751292,0.9988282591980631,0.9988679564445158
SRR9302960_k141_2440389_extended_partial	SRR9302960_k141_2440389_extended_partial	1	160103	high-quality	Fuxian	1	dsDNA,Myoviridae,T4virus	0.9953338340470372,0.9894025350056825,0.9897978300758757	Bacteria,Synechococcaceae,Synechococcus	0.9966154939026797,0.9970921196852455,0.9973976010218754
ERR3687827_contig-140_14_extended_circular	ERR3687827_contig-140_14_extended_circular,ERR3687830_contig-140_50_extended_circular	2	159868	circular	Lake_Rotsee	1	dsDNA,Myoviridae,T4virus	0.998188182409255,0.9985167016867986,0.9984957102947416	Bacteria,Enterobacteriaceae,Synechococcus	0.9983803622873831,0.9989468647242626,0.9989633777403804
SRR6754089_k141_1746038_extended_circular	SRR6754089_k141_1746038_extended_circular	1	159863	circular	Rimov	1	dsDNA,Myoviridae,T4virus	0.998319900006726,0.9985103964867426,0.9985811186846006	Bacteria,Enterobacteriaceae,Synechococcus	0.9984450846521173,0.9988752924239698,0.9989026550975574
ERR2814726_NODE_5_length_86639_cov_8.617799_extended_circular	ERR2814726_NODE_5_length_86639_cov_8.617799_extended_circular	1	159797	circular	Soyang	1	dsDNA,Myoviridae,T4virus	0.9990205255251889,0.9992528337933502,0.9994104065990379	Bacteria,Rhodothermaceae,Rhodothermus	0.9992201744346659,0.9995848806583015,0.9995749415002396
SRR6754088_k141_733040_extended_partial	SRR6754088_k141_733040_extended_partial	1	159680	high-quality	Rimov	1	dsDNA,Myoviridae,T4virus	0.9973334192767302,0.9980201671823795,0.9980521376893449	Bacteria,Rhodothermaceae,Rhodothermus	0.9979067840088401,0.9986135422971846,0.9986814511844169
SRR9214414_k141_1402352_extended_circular	SRR9214414_k141_1402352_extended_circular	1	159676	circular	Jiricka_pond	1	dsDNA,Myoviridae,M12virus	0.9976346882496693,0.9975031407777779,0.9973468296956706	Bacteria,Enterobacteriaceae,Sinorhizobium	0.9981435731481116,0.9983211183274167,0.9984233799524195
ERS4600511_contig-140_929_extended_partial	ERS4600511_contig-140_929_extended_partial	1	159653	high-quality	Mekkojärvi	1	dsDNA,Myoviridae,T4virus	0.9978700984238729,0.9982518832844418,0.9981623420633565	Bacteria,Enterobacteriaceae,Synechococcus	0.998206716918584,0.9987566868977702,0.9987443424930549
SRR6754089_k141_2307142_extended_partial	SRR6754089_k141_2307142_extended_partial	1	159308	high-quality	Rimov	1	dsDNA,Siphoviridae,T4virus	0.9920212765957447,0.9932439781398714,0.9932527372011395	Bacteria,Bacillaceae,Bacillus	0.9948158964442164,0.9964990920542477,0.9966147126626228
ERR3687830_contig-140_8_self_circular	ERR3687829_contig-140_21_extended_circular,ERR3687830_contig-140_8_self_circular,ERR3687828_contig-140_183_extended_circular,ERR3687826_contig-140_311_extended_circular	4	159183	circular	Lake_Rotsee	1	dsDNA,Myoviridae,T4virus	0.9983647400399076,0.9984757178864339,0.9984791796386399	Bacteria,Synechococcaceae,Synechococcus	0.9983882552586921,0.9987321478233842,0.9987139811716433
SRR9302958_k141_293326_extended_partial	SRR9302958_k141_293326_extended_partial	1	159035	high-quality	Lugu	1	dsDNA,Myoviridae,T4virus	0.9985735264444096,0.9987468414888468,0.999021936180647	Bacteria,Rhodothermaceae,Rhodothermus	0.9987339674020285,0.9992556480769546,0.9992583162912345
SRR8894380_k141_1253049_extended_circular	SRR8894380_k141_1253049_extended_circular,SRR9302959_k141_3958789_extended_circular	2	158881	circular	Fuxian	1	dsDNA,Myoviridae,T4virus	0.9856287693652893,0.9921027369297144,0.9920156931028592	Bacteria,Enterobacteriaceae,Synechococcus	0.9918134101582541,0.9951330835800873,0.9954176091326855
ERR3687830_contig-140_1492_extended_circular	ERR3687830_contig-140_1492_extended_circular	1	158605	circular	Lake_Rotsee	1	dsDNA,Myoviridae,M12virus	0.9980298410420824,0.9984457681861674,0.9985618329191486	Bacteria,Enterobacteriaceae,Synechococcus	0.9983045897628162,0.9989673139529177,0.9989894017301616
SRR6754089_k141_712892_extended_partial	SRR6754089_k141_712892_extended_partial	1	158577	high-quality	Rimov	1	dsDNA,Myoviridae,T4virus	0.9984670313656032,0.9986002455875422,0.9987354048082169	Bacteria,Rhodothermaceae,Rhodothermus	0.9985587434389676,0.9990225268702865,0.9990457870413543
ERS4600331_contig-140_21_extended_partial	ERS4600331_contig-140_21_extended_partial,ERS4600329_contig-140_34_extended_partial,ERS4600332_contig-140_13_extended_partial	3	158517	high-quality	Alinen_Mustajärvi	1	dsDNA,Myoviridae,Bxz1virus	0.9931674999439499,0.9917291538263895,0.9917153861836776	Bacteria,Bacillaceae,Bacillus	0.995624136706263,0.996227117313135,0.9965171227009432
SRR6754092_k141_520918_extended_partial	SRR6754092_k141_520918_extended_partial	1	158363	high-quality	Rimov	1	dsDNA,Myoviridae,T4virus	0.998055063560747,0.99783258748071,0.9975231566940892	Bacteria,Enterobacteriaceae,Synechococcus	0.9982793322546273,0.9984294992392887,0.9984949459243179
SRR8894380_k141_2260479_extended_circular	SRR8894380_k141_2260479_extended_circular	1	158335	circular	Fuxian	1	dsDNA,Myoviridae,T4virus	0.9972983880008072,0.9977443146799244,0.9976912183644568	Bacteria,Enterobacteriaceae,Synechococcus	0.9979146769801491,0.9983190734045512,0.9984645846029064
SRR6754102_k141_1343748_self_circular	SRR6754102_k141_1343748_self_circular	1	158175	circular	Rimov	1	dsDNA,Myoviridae,M12virus	0.9976907382911463,0.9970397085736534,0.9964569293755269	Bacteria,Synechococcaceae,Synechococcus	0.9980646434350211,0.9976565183961261,0.9979072374884247
ERR3687824_contig-140_1972_extended_partial	ERR3687824_contig-140_1972_extended_partial	1	157852	high-quality	Lake_Rotsee	1	dsDNA,Myoviridae,T4virus	0.9988888079277178,0.9991503742924384,0.9993139777717778	Bacteria,Rhodothermaceae,Rhodothermus	0.99913650893879,0.9995194431266052,0.9995055441941563
SRR6754094_k141_755130_self_circular	SRR6754094_k141_755130_self_circular	1	157802	circular	Rimov	1	dsDNA,Myoviridae,Bxz1virus	0.987427975696702,0.9899400533104665,0.9904342603357927	Bacteria,Enterobacteriaceae,Mycobacterium	0.9914140258100161,0.995280318026404,0.9957776076579927
ERR2814753_NODE_11_length_157075_cov_16.195466_extended_circular	ERR2814753_NODE_11_length_157075_cov_16.195466_extended_circular	1	157227	circular	Soyang	1	dsDNA,Myoviridae,T4virus	0.9979149384570545,0.9979161313814535,0.9976306059587505	Bacteria,Enterobacteriaceae,Synechococcus	0.9982272386439875,0.9985419699968917,0.9986489211971903
ERR2814726_NODE_1_length_157151_cov_28.099641_self_circular	ERR2814726_NODE_1_length_157151_cov_28.099641_self_circular	1	157024	circular	Soyang	1	dsDNA,Myoviridae,T4virus	0.9986267739838127,0.9987436888888188,0.9989668339936412	Bacteria,Rhodothermaceae,Rhodothermus	0.998904455582304,0.9993354000687094,0.9993428942580235
ERR2814725_NODE_6_length_105078_cov_9.229984_extended_partial	ERR2814725_NODE_6_length_105078_cov_9.229984_extended_partial	1	156759	circular	Soyang	1	dsDNA,Myoviridae,Slashvirus	0.9979289509674237,0.9982991722848626,0.9983882610300803	Bacteria,Synechococcaceae,Synechococcus	0.9982461817751292,0.9988589330410457,0.9989026550975574
SRR6754096_k141_1464277_self_circular	SRR6754096_k141_1464277_self_circular,SRR6754098_k141_782230_self_circular,SRR6754088_k141_3360386_self_circular	3	156736	circular	Rimov	1	dsDNA,Myoviridae,M12virus	0.9962096159451158,0.9971926096750142,0.9965065213438321	Bacteria,Synechococcaceae,Sinorhizobium	0.9973874264967046,0.9977730789994601,0.9979636227996175
SRR6754092_k141_853728_self_circular	SRR6754092_k141_853728_self_circular,SRR6754086_k141_2680043_extended_circular,SRR6754088_k141_1024649_extended_circular	3	156312	circular	Rimov	1	dsDNA,Myoviridae,M12virus	0.9974707418783489,0.9976229395788442,0.9973165234928174	Bacteria,Enterobacteriaceae,Synechococcus	0.9979115197916255,0.9984110949334991,0.99853831924062
SRR9214418_k141_1322153_self_circular	SRR9214418_k141_1322153_self_circular	1	156308	circular	Jiricka_pond	1	dsDNA,Myoviridae,Bxz1virus	0.9956673317938255,0.9949306191548825,0.9934511050743604	Bacteria,Mycobacteriaceae,Mycobacterium	0.997376376336872,0.9969264809331392,0.9971351924582478
ERR2814751_NODE_6_length_156251_cov_37.290372	ERR2814751_NODE_6_length_156251_cov_37.290372	1	156251	high-quality	Soyang	1	dsDNA,Myoviridae,T4virus	0.998999506759635,0.9991598320925225,0.999324998209179	Bacteria,Rhodothermaceae,Rhodothermus	0.999202809897786,0.9995378474323948,0.999520724854862
SRR6754092_k141_290111_self_circular	SRR6754094_k141_2139397_extended_circular,SRR6754101_k141_2471022_extended_circular,SRR6754092_k141_290111_self_circular	3	155928	circular	Rimov	1	dsDNA,Myoviridae,M12virus	0.9971022128556375,0.9971374391745232,0.9967930527162623	Bacteria,Enterobacteriaceae,Synechococcus	0.9976605233039978,0.9973824987321478,0.9976708529145785
ERR2814751_NODE_7_length_156214_cov_80.916585_self_circular	ERR2814751_NODE_7_length_156214_cov_80.916585_self_circular,ERR2814752_NODE_9_length_156214_cov_25.480719_self_circular	2	156087	circular	Soyang	1	dsDNA,Myoviridae,T4virus	0.9990163217720781,0.9991393401923401,0.9993057124437269	Bacteria,Rhodothermaceae,Rhodothermus	0.9992107028690951,0.9994949040522192,0.9994686768752995
SRR9214415_k141_11917_self_circular	SRR9214415_k141_11917_self_circular	1	156037	circular	Jiricka_pond	1	dsDNA,Myoviridae,M12virus	0.9984179875793108,0.9983984791857464,0.9985149960601937	Bacteria,Enterobacteriaceae,Synechococcus	0.998580843758633,0.9989795834901107,0.9990110883883127
SRR9214415_k141_644774	SRR9214415_k141_644774	1	156009	high-quality	Jiricka_pond	1	dsDNA,Myoviridae,T4virus	0.9976697195255925,0.9976560418791388,0.9975176464753887	Bacteria,Enterobacteriaceae,Synechococcus	0.99810726548009,0.9985194758453712,0.9986250658732241
ERS4600329_contig-140_1150_extended_partial	ERS4600329_contig-140_1150_extended_partial	1	155953	circular	Alinen_Mustajärvi	1	dsDNA,Myoviridae,T4virus	0.9982456337017689,0.9983259693851011,0.9982697913280179	Bacteria,Enterobacteriaceae,Synechococcus	0.9983424760250996,0.9987934955093494,0.9988267517940288
SRR6754103_k141_1540402_extended_circular	SRR6754103_k141_1540402_extended_circular	1	155911	circular	Rimov	1	dsDNA,Myoviridae,M12virus	0.9972885792435486,0.9975709216783812,0.9975672384436939	Bacteria,Enterobacteriaceae,Sinorhizobium	0.9978294328900115,0.9978037528424428,0.9979983214526591
SRR9302965_k141_71371_extended_circular	SRR9302965_k141_71371_extended_circular	1	155771	circular	Dianchi	1	dsDNA,Siphoviridae,T4virus	0.9937364078649418,0.9947036319528624,0.993619166744728	Bacteria,Bacillaceae,Bacillus	0.9952073878211453,0.9969653344675838,0.9972696497387842
SRR9302960_k141_158232_extended_circular	SRR9302960_k141_158232_extended_circular	1	155206	circular	Fuxian	1	dsDNA,Myoviridae,T4virus	0.9989742842409703,0.9991566794924944,0.999324998209179	Bacteria,Rhodothermaceae,Rhodothermus	0.9991854453609061,0.9995133083580088,0.9995033755283412
SRR9214418_k141_203480	SRR9214418_k141_203480	1	155181	high-quality	Jiricka_pond	1	dsDNA,Myoviridae,M12virus	0.9981517498822949,0.9981904075838947,0.9980604030173957	Bacteria,Enterobacteriaceae,Synechococcus	0.9983424760250996,0.9985603743026813,0.9986597645262658
SRR8894380_k141_3401822_extended_circular	SRR8894380_k141_3401822_extended_circular	1	155111	circular	Fuxian	1	dsDNA,Myoviridae,T4virus	0.9981055085980763,0.9984489207861954,0.9985122409508433	Bacteria,Enterobacteriaceae,Synechococcus	0.9982777536603654,0.9988548431953147,0.9988874744368517
SRR9302965_k141_364764_extended_partial	SRR9302965_k141_364764_extended_partial	1	154865	high-quality	Dianchi	1	dsDNA,Myoviridae,M12virus	0.9980718785731901,0.998534040986953,0.998641731090307	Bacteria,Enterobacteriaceae,Bacillus	0.9983440546193615,0.9989877631815728,0.999019763051573
SRR9214416_k141_770396_extended_partial	SRR9214416_k141_770396_extended_partial	1	154628	high-quality	Jiricka_pond	1	dsDNA,Myoviridae,T4virus	0.9988425666434994,0.9991487979924243,0.9993002022250264	Bacteria,Rhodothermaceae,Rhodothermus	0.9990796795453648,0.9995010388208156,0.9994925321992657
SRR9302958_k141_874250_extended_circular	SRR9302958_k141_874250_extended_circular	1	154545	circular	Lugu	1	dsDNA,Myoviridae,T4virus	0.9981419411250364,0.9984331577860551,0.9984681592012387	Bacteria,Enterobacteriaceae,Synechococcus	0.9983551047791941,0.9988732475011043,0.9989134984266329
SRR8561390_k141_2824876_self_circular	SRR8561390_k141_2824876_self_circular	1	154380	circular	Baikal	1	dsDNA,Myoviridae,Bxz1virus	0.9920983454027756,0.9927521725354943,0.9940572291314242	Bacteria,Mycobacteriaceae,Mycobacterium	0.9953115750424247,0.996785381255419,0.9969053138818468
ERS4600570_NODE_600_length_32166_cov_8.685664_extended_partial	ERS4600570_NODE_600_length_32166_cov_8.685664_extended_partial	1	154337	high-quality	Björntjärnan	1	dsDNA,Myoviridae,Bxz1virus	0.9823372306795507,0.9904476219149838,0.9917456923865309	Bacteria,Enterobacteriaceae,Mycobacterium	0.9899396187694858,0.9954255075498553,0.9956951983570188
SRR6754086_k141_1724282_self_circular	SRR6754086_k141_1724282_self_circular,SRR6754094_k141_173165_self_circular	2	154057	circular	Rimov	1	dsDNA,Myoviridae,Chlorovirus	0.9968724076855817,0.9974369361771888,0.9972531559777608	Bacteria,Enterobacteriaceae,Bacillus	0.9976478945499033,0.9983027140216271,0.9984645846029064
SRR6754096_k141_2613889_self_circular	SRR6754096_k141_2613889_self_circular,SRR6754097_k141_1112432_self_circular,SRR6754094_k141_2404596_self_circular,SRR6754098_k141_2092597_self_circular	4	154036	circular	Rimov	1	dsDNA,Myoviridae,T4virus	0.9976949420442571,0.9976040239786758,0.9974845851631852	Bacteria,Enterobacteriaceae,Synechococcus	0.9980583290579739,0.9982618155643169,0.9983995246284534
SRR6754092_k141_3094166_self_circular	SRR6754094_k141_1856056_extended_partial,SRR6754088_k141_2975309_extended_circular,SRR6754086_k141_2703181_extended_circular,SRR6754092_k141_3094166_self_circular	4	153843	circular	Rimov	1	dsDNA,Myoviridae,M12virus	0.9960078357957984,0.994525510051277,0.9936907995878357	Bacteria,Enterobacteriaceae,Bacillus	0.9969406843206124,0.9972086802885796,0.9975429016314873
SRR6754094_k141_2564314_extended_circular	SRR6754094_k141_2564314_extended_circular,SRR6754088_k141_1503074_extended_circular,SRR6754092_k141_2041176_extended_circular	3	153760	circular	Rimov	1	dsDNA,Myoviridae,T4virus	0.9890674394099052,0.9916329995255337,0.9924868168017589	Bacteria,Synechococcaceae,Synechococcus	0.9907620663798887,0.9955543376903824,0.9959576069206464
SRR6754087_k141_2795957_extended_partial	SRR6754087_k141_2795957_extended_partial	1	153203	high-quality	Rimov	1	dsDNA,Myoviridae,Bxz1virus	0.9853933591910858,0.9894718922062998,0.9904287501170922	Bacteria,Enterobacteriaceae,Mycobacterium	0.9916492363550259,0.9949838042109052,0.9954783317755084
ERS4600511_contig-140_101_extended_partial	ERS4600511_contig-140_101_extended_partial	1	153164	circular	Mekkojärvi	1	dsDNA,Myoviridae,T4virus	0.9976571082662601,0.9981194740832633,0.9978482595974234	Bacteria,Enterobacteriaceae,Synechococcus	0.9980472788981412,0.9985828684542019,0.9986749451869715
SRR6754103_k141_636255_self_circular	SRR6754103_k141_636255_self_circular	1	152916	circular	Rimov	1	dsDNA,Myoviridae,M12virus	0.9981545523843688,0.9984300051860271,0.998300097530871	Bacteria,Enterobacteriaceae,Synechococcus	0.9983882552586921,0.9986708001374188,0.9987226558349038
ERS4600333_contig-140_35_self_circular	ERS4600333_contig-140_35_self_circular,ERS4600334_contig-140_36_self_circular	2	152590	circular	Alinen_Mustajärvi	1	dsDNA,Siphoviridae,Phicbkvirus	0.9790330807344797,0.9833227458515724,0.9850783277588288	Bacteria,Enterobacteriaceae,Mycobacterium	0.9886688503887289,0.9933540006870941,0.9931968953380191
SRR9214416_k141_104739_extended_circular	SRR9214416_k141_104739_extended_circular	1	152439	circular	Jiricka_pond	1	dsDNA,Myoviridae,T4virus	0.9980298410420824,0.9982061705840349,0.9979529537527344	Bacteria,Enterobacteriaceae,Synechococcus	0.9983045897628162,0.9985562844569503,0.9986489211971903
SRR9302958_k141_97807_extended_partial	SRR9302958_k141_97807_extended_partial	1	152355	high-quality	Lugu	1	dsDNA,Myoviridae,T4virus	0.9986674102638836,0.9990006257911056,0.9992092836164668	Bacteria,Rhodothermaceae,Rhodothermus	0.9989786495126091,0.9994540055949089,0.9994339782222579
SRR9302958_k141_735989_extended_partial	SRR9302958_k141_735989_extended_partial	1	151673	high-quality	Lugu	1	dsDNA,Myoviridae,T4virus	0.9988846041746071,0.9990936274919333,0.9992671409128229	Bacteria,Rhodothermaceae,Rhodothermus	0.99913650893879,0.9995133083580088,0.9995033755283412
SRR9214416_k141_654002_extended_partial	SRR9214416_k141_654002_extended_partial	1	151226	high-quality	Jiricka_pond	1	dsDNA,Myoviridae,Chlorovirus	0.9973180055153241,0.9974448176772589,0.9972145844468567	Bacteria,Bacillaceae,Bacillus	0.9977205098859465,0.9983681515533234,0.9985253072457294
SRR4198832_contig-140_975_extended_circular	SRR4198832_contig-140_975_extended_circular	1	151128	circular	Tous	1	dsDNA,Myoviridae,M12virus	0.9973838643140596,0.9973644263765434,0.9971264209476474	Bacteria,Synechococcaceae,Synechococcus	0.9979083626031019,0.9983149835588202,0.9984775965977971
ERR2814726_NODE_23_length_56783_cov_7.237980_extended_partial	ERR2814726_NODE_23_length_56783_cov_7.237980_extended_partial	1	150904	high-quality	Soyang	1	dsDNA,Myoviridae,T4virus	0.9990961930811829,0.9992544100933642,0.9994269372551396	Bacteria,Rhodothermaceae,Rhodothermus	0.9992580606969493,0.9995930603497636,0.9995836161635
SRR8894380_k141_4699895_self_circular	SRR8894380_k141_4699895_self_circular	1	150629	circular	Fuxian	1	dsDNA,Siphoviridae,T4virus	0.9928522184606416,0.9927553251355224,0.992393143083849	Bacteria,Bacillaceae,Synechococcus	0.9958040964521094,0.9967035843407986,0.9971351924582478
SRR8894382_k141_2006022_extended_partial	SRR8894382_k141_2006022_extended_partial,SRR8894378_k141_2448107_extended_partial	2	150549	high-quality	Fuxian	1	dsDNA,Myoviridae,T4virus	0.7179968275676524,0.8821652687512709,0.9261079672252192	Bacteria,Mycobacteriaceae,Mycobacterium	0.7934172619282529,0.8960402113632274,0.9138367385001074
SRR6754087_k141_3348500_extended_partial	SRR6754087_k141_3348500_extended_partial	1	150359	high-quality	Rimov	1	dsDNA,Myoviridae,T4virus	0.9871211017196153,0.9916897463260388,0.9925887558477196	Bacteria,Enterobacteriaceae,Synechococcus	0.9927542523382927,0.99644796898261,0.9965604960172453
SRR5338504_k141_2905725_extended_partial	SRR5338504_k141_2905725_extended_partial	1	150150	circular	Tous	1	dsDNA,Myoviridae,T4virus	0.9968485864179539,0.9976970256795036,0.9975562180062927	Bacteria,Flavobacteriaceae,Cellulophaga	0.9977678677138009,0.9984847121566575,0.9985925358859976
SRR8894380_k141_2444626_extended_circular	SRR8894380_k141_2444626_extended_circular	1	149888	circular	Fuxian	1	dsDNA,Myoviridae,T4virus	0.9973502342891734,0.9979129787814255,0.9979942803929888	Bacteria,Enterobacteriaceae,Bacillus	0.9979730849678361,0.9986176321429155,0.9986901258476772
SRR6754098_k141_1595188_extended_partial	SRR6754098_k141_1595188_extended_partial	1	149629	high-quality	Rimov	1	dsDNA,Myoviridae,T4virus	0.9990163217720781,0.9992291892931398,0.9994076514896876	Bacteria,Rhodothermaceae,Rhodothermus	0.999235960377284,0.9996053298869567,0.9995944594925755
ERS4600484_contig-140_17_self_circular	ERS4600484_contig-140_17_self_circular	1	149472	circular	Loclat	1	dsDNA,Myoviridae,Bxz1virus	0.9988425666434994,0.9990699829917229,0.9992175489445176	Bacteria,Mycobacteriaceae,Mycobacterium	0.9991349303445282,0.9995030837436812,0.9994947008650807
SRR6754087_k141_1455068_extended_partial	SRR6754087_k141_1455068_extended_partial	1	149363	high-quality	Rimov	1	dsDNA,Myoviridae,T4virus	0.9989084254422348,0.9991204245921718,0.9992561204754217	Bacteria,Rhodothermaceae,Rhodothermus	0.9990938868937211,0.9994683200549676,0.9994469902171486
SRR9302962_k141_1175909	SRR9302962_k141_1175909	1	148971	high-quality	Erhai	1	dsDNA,Myoviridae,T4virus	0.9973474317870995,0.9977569250800367,0.9976443815055019	Bacteria,Enterobacteriaceae,Bacillus	0.9977505031769209,0.9983292980188787,0.9984862712610575
SRR9302960_k141_2287619_extended_partial	SRR9302960_k141_2287619_extended_partial	1	148746	high-quality	Fuxian	1	dsDNA,Myoviridae,T4virus	0.9991774656413246,0.9992780545935747,0.9994269372551396	Bacteria,Rhodothermaceae,Rhodothermus	0.9992959469592329,0.9996073748098222,0.9995944594925755
SRR6754097_k141_1633147_self_circular	SRR6754086_k141_2192468_extended_circular,SRR6754097_k141_1633147_self_circular	2	148548	circular	Rimov	1	dsDNA,Myoviridae,M12virus	0.9963161110239221,0.9972320171753649,0.9969500939492288	Bacteria,Enterobacteriaceae,Sinorhizobium	0.9973747977426102,0.9978098876110393,0.997976634794508
SRR6754086_k141_211789_extended_circular	SRR6754086_k141_211789_extended_circular,SRR6754094_k141_2630144_extended_circular	2	148356	circular	Rimov	1	dsDNA,Myoviridae,T4virus	0.9961703809160819,0.9971311339744671,0.9968564202313189	Bacteria,Synechococcaceae,Synechococcus	0.9974079482221082,0.9981738838811,0.9983149466616643
ERR3687830_contig-140_1748_extended_partial	ERR3687830_contig-140_1748_extended_partial	1	148036	circular	Lake_Rotsee	1	dsDNA,Myoviridae,T4virus	0.9979317534694976,0.9977080597796018,0.9972999928367157	Bacteria,Synechococcaceae,Synechococcus	0.9981609376849915,0.9982393214127963,0.9983821753019325
ERS4600516_contig-140_170_extended_circular	ERS4600516_contig-140_170_extended_circular	1	147677	circular	Mekkojärvi	1	dsDNA,Myoviridae,T4virus	0.9976599107683339,0.9970460137737095,0.9962255001901026	Bacteria,Enterobacteriaceae,Synechococcus	0.9981435731481116,0.9977587645394016,0.9978768761670133
ERS4600326_contig-140_17_self_circular	ERS4600326_contig-140_17_self_circular,ERS4600334_contig-140_38_self_circular,ERS4600335_contig-140_24_self_circular,ERS4600337_contig-140_29_self_circular	4	147558	circular	Alinen_Mustajärvi	1	dsDNA,Myoviridae,Bxz1virus	0.9701267291437796,0.9805043214264885,0.9861831266082951	Bacteria,Mycobacteriaceae,Mycobacterium	0.9820198113579857,0.9921638555793676,0.9923467783384984
SRR6754086_k141_2887600_extended_circular	SRR6754088_k141_3162172_extended_partial,SRR6754086_k141_2887600_extended_circular	2	146868	circular	Rimov	1	dsDNA,Myoviridae,T4virus	0.9965739412147165,0.9968284843717735,0.9966084603897929	Bacteria,Enterobacteriaceae,Synechococcus	0.9974568846442243,0.997652428550395,0.9978660328379377
SRR9302957_k141_932913_self_circular	SRR9302957_k141_932913_self_circular	1	147160	circular	Lugu	1	dsDNA,Myoviridae,T4virus	0.9850906889671098,0.9907029825172565,0.9905003829601997	Bacteria,Synechococcaceae,Synechococcus	0.9900138126997908,0.9935830320480311,0.9942682162506804
ERS4600469_contig-140_18_extended_partial	ERS4600469_contig-140_18_extended_partial,ERS4600472_contig-140_46_extended_partial	2	147145	circular	Loclat	1	dsDNA,Siphoviridae,T4virus	0.9949484900118826,0.9919923959287323,0.9914123241551457	Bacteria,Bacillaceae,Bacillus	0.9965255140297565,0.9966054280432542,0.9967773625987556
ERR3687829_contig-140_11_self_circular	ERR3687829_contig-140_11_self_circular,ERR3687830_contig-140_10_self_circular	2	146689	circular	Lake_Rotsee	1	dsDNA,Myoviridae,M12virus	0.9975828419613031,0.9975709216783812,0.9972944826180151	Bacteria,Synechococcaceae,Synechococcus	0.9980283357669995,0.9982229620298723,0.9983431393172606
SRR9214416_k141_222797_extended_circular	SRR9214416_k141_222797_extended_circular	1	145722	circular	Jiricka_pond	1	dsDNA,Myoviridae,T4virus	0.9966986525570029,0.9975157511778902,0.997275196852563	Bacteria,Synechococcaceae,Synechococcus	0.9975421287343621,0.9981759288039656,0.9983192839932945
SRR6754100_NODE_71_length_138929_cov_7.912314_extended_circular	SRR6754100_NODE_71_length_138929_cov_7.912314_extended_circular	1	145402	circular	Rimov	1	dsDNA,Myoviridae,T4virus	0.9818299778041836,0.9872398513864347,0.9864228211217704	Bacteria,Enterobacteriaceae,Synechococcus	0.9881400213110225,0.9918223534608275,0.9927132828612509
ERR2814752_NODE_41_length_68085_cov_59.927396_extended_circular	ERR2814752_NODE_41_length_68085_cov_59.927396_extended_circular,ERR2814725_NODE_10_length_83347_cov_9.817796_extended_circular	2	145305	circular	Soyang	1	dsDNA,Myoviridae,T4virus	0.9938485079478959,0.9927852748357889,0.9941261068651814	Bacteria,Enterobacteriaceae,Synechococcus	0.994969020087612,0.997202545519983,0.9974886849861097
ERS4600339_contig-140_846_extended_partial	ERS4600339_contig-140_846_extended_partial	1	142991	high-quality	Alinen_Mustajärvi	1	dsDNA,Myoviridae,Bxz1virus	0.9971736766585207,0.997775840680205,0.9979501986433842	Bacteria,Mycobacteriaceae,Mycobacterium	0.9978057539760843,0.9985419699968917,0.9986337405364846
SRR6754094_k141_4485947_self_circular	SRR6754094_k141_4485947_self_circular,SRR6754098_k141_1333914_self_circular,SRR6754096_k141_1720743_self_circular,SRR6754100_NODE_70_length_142775_cov_10.311676,SRR6754101_k141_1758664_self_circular,SRR6754086_k141_3320268_self_circular,SRR6754087_k141_1280247_self_circular	7	142776	circular	Rimov	1	dsDNA,Siphoviridae,T4virus	0.9903748066273569,0.9917386116264737,0.9908089552074322	Bacteria,Bacillaceae,Bacillus	0.9943596827025534,0.9951330835800873,0.9952788145205188
SRR6754087_k141_1000146_extended_partial	SRR6754087_k141_1000146_extended_partial	1	142413	circular	Rimov	1	dsDNA,Siphoviridae,T4virus	0.9939942380557362,0.9961806250660076,0.9951151911219356	Bacteria,Bacillaceae,Bacillus	0.9964102766486443,0.9973538698120307,0.9975624196238232
SRR9302963_k141_359824_extended_partial	SRR9302963_k141_359824_extended_partial	1	141846	circular	Xingyun	1	dsDNA,Siphoviridae,T4virus	0.9953086115283726,0.9965274110690939,0.9959610096924747	Bacteria,Synechococcaceae,Synechococcus	0.9968443900706421,0.9973824987321478,0.9977315755574013
SRR9214418_k141_1322042_self_circular	SRR9214418_k141_1322042_self_circular	1	141667	circular	Jiricka_pond	1	dsDNA,Myoviridae,M12virus	0.9977439858305495,0.997775840680205,0.997236625321659	Bacteria,Enterobacteriaceae,Synechococcus	0.9981198942341845,0.998294534330165,0.9984472352763856
SRR7054680_k141_2151651_extended_partial	SRR7054680_k141_2151651_extended_partial	1	141429	circular	Zurich	1	dsDNA,Myoviridae,Bxz1virus	0.9915406474900792,0.9926181870343018,0.9922719182724362	Bacteria,Mycobacteriaceae,Mycobacterium	0.993998184616599,0.9967178988008573,0.9968315792441332
SRR4449214_contig-140_0_self_circular	SRR4449214_contig-140_0_self_circular	1	140223	circular	Lough_Neagh	1	dsDNA,Myoviridae,T4virus	0.9902178665112212,0.9850346076668081,0.9869876185385797	Bacteria,Synechococcaceae,Synechococcus	0.9940897430837838,0.9931617779377362,0.9936674958198967
SRR6754102_k141_2506876_extended_circular	SRR6754102_k141_2506876_extended_circular	1	137994	circular	Rimov	1	dsDNA,Siphoviridae,T4virus	0.986937537833778,0.9914611828240045,0.9905472198191546	Bacteria,Bacillaceae,Bacillus	0.9932262520225739,0.9957281561339506,0.9960508595506958
ERS4600334_contig-140_57_extended_partial	ERS4600334_contig-140_57_extended_partial	1	137766	circular	Alinen_Mustajärvi	1	dsDNA,Myoviridae,Bxz1virus	0.9636725668676995,0.9511520388652531,0.9655115411530684	Bacteria,Vibrionaceae,Mycobacterium	0.9757954141836694,0.972375137009832,0.9763940726025941
ERS4600402_contig-140_154_extended_partial	ERS4600402_contig-140_154_extended_partial,ERS4600389_contig-140_855_extended_partial	2	137652	high-quality	SAS2	1	dsDNA,Myoviridae,T4virus	0.9891641257314531,0.9872445802864768,0.9846650613562852	Bacteria,Bacillaceae,Bacillus	0.993748766723233,0.9944562141116037,0.9938930370646675
ERS4600333_contig-140_48	ERS4600333_contig-140_48	1	137147	high-quality	Alinen_Mustajärvi	1	dsDNA,Podoviridae,T4virus	0.9661569849561689,0.9849589452661346,0.9206583609303454	Bacteria,Vibrionaceae,Vibrio	0.9815351829196101,0.9174873623766912,0.9293014944276132
ERR2814753_NODE_45_length_89935_cov_57.566809_extended_partial	ERR2814753_NODE_45_length_89935_cov_57.566809_extended_partial	1	136948	circular	Soyang	1	dsDNA,Siphoviridae,T4virus	0.9967224738246306,0.9951449959567905,0.9931260021710262	Bacteria,Streptomycetaceae,Streptomyces	0.9971680018943131,0.9969264809331392,0.9970592891547191
SRR6754089_k141_148091_self_circular	SRR6754089_k141_148091_self_circular	1	136934	circular	Rimov	1	dsDNA,Myoviridae,T4virus	0.9960078357957984,0.9950582994560189,0.9942115152550405	Bacteria,Synechococcaceae,Synechococcus	0.9968996408698054,0.9968446840185188,0.9971720597771045
SRR8894378_k141_1699456_self_circular	SRR8894381_k141_1783058_extended_circular,SRR8894378_k141_1699456_self_circular	2	136507	circular	Fuxian	1	dsDNA,Myoviridae,M12virus	0.9960722933434971,0.9965605133693886,0.9959417239270226	Bacteria,Enterobacteriaceae,Sinorhizobium	0.9972248312877383,0.9974377116495166,0.9977185635625108
SRR8894382_k141_2057964_self_circular	SRR8894382_k141_2057964_self_circular	1	136828	circular	Fuxian	1	dsDNA,Myoviridae,T4virus	0.9881173912068695,0.9902600422133144,0.9912112011725746	Bacteria,Enterobacteriaceae,Bacillus	0.9935751213544338,0.9935707625108381,0.9920735264457953
SRR8894380_k141_300004_extended_circular	SRR8894380_k141_300004_extended_circular	1	136368	circular	Fuxian	1	dsDNA,Myoviridae,M12virus	0.9965697374616057,0.9966818884704688,0.9959141728335198	Bacteria,Synechococcaceae,Synechococcus	0.9974363629188208,0.9980368740491109,0.9982000073734638
SRR9302960_k141_2772755_extended_circular	SRR9302960_k141_2772755_extended_circular	1	135848	circular	Fuxian	1	dsDNA,Siphoviridae,T4virus	0.9907279218886622,0.9914091649235416,0.9905968117874598	Bacteria,Bacillaceae,Bacillus	0.9934567267847981,0.9950287925139464,0.9953178505051907
SRR9214414_k141_256474_self_circular	SRR9214414_k141_256474_self_circular	1	135229	circular	Jiricka_pond	1	dsDNA,Podoviridae,Cba41virus	0.9967322825818891,0.9975977187786197,0.9975479526782418	Bacteria,Flavobacteriaceae,Cellulophaga	0.9975879079679545,0.9983988253963061,0.9985209699140991
SRR6754088_k141_1023711_extended_circular	SRR6754088_k141_1023711_extended_circular	1	135118	circular	Rimov	1	dsDNA,Podoviridae,Cba41virus	0.9944986884290294,0.9966062260697954,0.996743460747957	Bacteria,Flavobacteriaceae,Cellulophaga	0.9966912664272466,0.9979428075972975,0.9980980800801539
SRR6754103_k141_1963748_extended_circular	SRR6754103_k141_1963748_extended_circular	1	133852	circular	Rimov	1	dsDNA,Myoviridae,Slashvirus	0.9979149384570545,0.9980516931826601,0.9980989745482998	Bacteria,Bacillaceae,Bacillus	0.9983219542996962,0.998603317682857,0.9986901258476772
ERS4600483_contig-140_17_self_circular	ERS4600483_contig-140_17_self_circular	1	133076	circular	Loclat	1	dsDNA,Myoviridae,Cr3virus	0.9830630787166782,0.9760024085864214,0.9813589301359371	Bacteria,Enterobacteriaceae,Bacillus	0.9884857334543589,0.9900821241022789,0.9887467930854259
SRR6754093_k141_1231562_extended_circular	SRR6754093_k141_1231562_extended_circular	1	132766	circular	Rimov	1	dsDNA,Siphoviridae,T4virus	0.9949807187857319,0.9923833183322115,0.988822521365873	Bacteria,Streptomycetaceae,Streptomyces	0.9965255140297565,0.9950328823596774,0.9955238737576255
ERS4600468_contig-140_203_extended_partial	ERS4600468_contig-140_203_extended_partial	1	132610	high-quality	Loclat	1	dsDNA,Podoviridae,Cba41virus	0.998489451382194,0.9989233870904182,0.9992065285071164	Bacteria,Flavobacteriaceae,Cellulophaga	0.9987166028651486,0.9994151520604643,0.9994014482350313
SRR6754098_k141_76686_self_circular	SRR6754098_k141_76686_self_circular,SRR6754086_k141_3732267_self_circular	2	132352	circular	Rimov	1	dsDNA,Myoviridae,Slashvirus	0.997676725780777,0.9982786803846803,0.9982312197971137	Bacteria,Synechococcaceae,Synechococcus	0.9981293657997553,0.9987178333633255,0.9987378364956095
ERR3687822_contig-140_159_extended_circular	ERR3687821_contig-140_50_extended_partial,ERR3687822_contig-140_159_extended_circular	2	132185	circular	Lake_Rotsee	1	dsDNA,Siphoviridae,Sitaravirus	0.9937658341367173,0.9909205119191925,0.9877893553595142	Bacteria,Streptomycetaceae,Streptomyces	0.9954978491653182,0.9936607391169205,0.9943332762251336
SRR8894382_k141_1623877_extended_circular	SRR8894382_k141_1623877_extended_circular	1	131703	circular	Fuxian	1	dsDNA,Siphoviridae,Cba41virus	0.6889671098356612,0.8544050492042049,0.9107317019412501	Bacteria,Flavobacteriaceae,Bacillus	0.7373771656340029,0.8761778755705335,0.8835231277365851
SRR8894380_k141_2916508	SRR8894380_k141_2916508	1	130699	high-quality	Fuxian	1	dsDNA,Myoviridae,Slashvirus	0.9918951640024214,0.9947556498533253,0.9953686611821623	Bacteria,Enterobacteriaceae,Bacillus	0.9948395753581436,0.9972618482830827,0.9975450702973024
SRR9302959_k141_4644177_extended_partial	SRR9302959_k141_4644177_extended_partial	1	129873	high-quality	Fuxian	1	dsDNA,Siphoviridae,T4virus	0.9958060556464812,0.9947855995535918,0.9924868168017589	Bacteria,Streptomycetaceae,Streptomyces	0.9971490587631714,0.9972229947486381,0.9975385642998571
SRR9214418_k141_103428_extended_partial	SRR9214418_k141_103428_extended_partial	1	129714	circular	Jiricka_pond	1	dsDNA,Podoviridae,Cba41virus	0.9987781090958008,0.9990857459918632,0.9993029573343766	Bacteria,Flavobacteriaceae,Cellulophaga	0.9990828367338884,0.9995030837436812,0.9994947008650807
SRR9214414_k141_1577530_extended_circular	SRR9214414_k141_1577530_extended_circular	1	129547	circular	Jiricka_pond	1	dsDNA,Podoviridae,Cba41virus	0.9984446113490124,0.9987878252892116,0.9991376507733591	Bacteria,Flavobacteriaceae,Cellulophaga	0.9986345159635345,0.9994131071375988,0.9993884362401407
SRR6754088_k141_1771247_extended_circular	SRR6754088_k141_1771247_extended_circular,SRR6754095_k141_1684303_extended_circular,SRR6754086_k141_2423135_extended_partial	3	129516	circular	Rimov	1	dsDNA,Podoviridae,Cba41virus	0.9983927650606461,0.9987373836887627,0.9991183650079072	Bacteria,Flavobacteriaceae,Cellulophaga	0.998588736729942,0.9993169957629198,0.9993233762656876
SRR6754101_k141_2052185_extended_circular	SRR6754101_k141_2052185_extended_circular	1	129472	circular	Rimov	1	dsDNA,Myoviridae,M12virus	0.995941976997063,0.9957991604626125,0.9934125335434564	Bacteria,Enterobacteriaceae,Synechococcus	0.9969738348001105,0.9966708655749505,0.9968597718997295
ERS4600511_contig-140_41_extended_circular	ERS4600511_contig-140_41_extended_circular	1	129449	circular	Mekkojärvi	1	dsDNA,Myoviridae,Bxz1virus	0.9963525435508822,0.9974085627769362,0.9973082581647665	Bacteria,Mycobacteriaceae,Mycobacterium	0.9974142625991554,0.9982618155643169,0.9984168739549741
SRR6754087_k141_1922809_self_circular	SRR6754087_k141_1922809_self_circular,SRR6754089_k141_2159710_self_circular	2	129441	circular	Rimov	1	dsDNA,Siphoviridae,T4virus	0.9962236284554851,0.9944498476506036,0.9931728390299811	Bacteria,Bacillaceae,Bacillus	0.9969548916689688,0.9970634907651283,0.9974084443509509
ERS4600336_contig-140_322_extended_partial	ERS4600336_contig-140_322_extended_partial	1	129391	circular	Alinen_Mustajärvi	1	dsDNA,Siphoviridae,Phicbkvirus	0.9876045333273547,0.9851748983680566,0.9844226117334597	Bacteria,Rhodobacteraceae,Bacillus	0.9930399778996803,0.9936811883455756,0.9932966539655139
SRR9214416_k141_636617	SRR9214416_k141_636617	1	129350	high-quality	Jiricka_pond	1	dsDNA,Siphoviridae,T4virus	0.9972535479676254,0.9966030734697674,0.9936053911979766	Bacteria,Streptomycetaceae,Streptomyces	0.9978420616441059,0.9975256433327335,0.9977988041976695
SRR6754103_k141_939101_extended_partial	SRR6754103_k141_939101_extended_partial	1	129140	circular	Rimov	1	dsDNA,Podoviridae,Cba41virus	0.9983591350357599,0.9987373836887627,0.9990660179302516	Bacteria,Flavobacteriaceae,Cellulophaga	0.9985792651643711,0.9993231305315163,0.9993342195947631
ERS4600468_contig-140_2778_extended_circular	ERS4600473_contig-140_646_extended_partial,ERS4600471_contig-140_371_extended_partial,ERS4600468_contig-140_2778_extended_circular,ERS4600470_contig-140_1214_extended_circular	4	128211	circular	Loclat	1	dsDNA,Podoviridae,Cba41virus	0.9980102235275654,0.9985482276870792,0.9987216292614653	Bacteria,Flavobacteriaceae,Cellulophaga	0.9983472118078851,0.999045021021807,0.9990674736995053
SRR6754096_k141_2052291_extended_circular	SRR6754096_k141_2052291_extended_circular	1	128169	circular	Rimov	1	dsDNA,Siphoviridae,P12024virus	0.9857899132345358,0.9892244131040973,0.9855962883166833	Bacteria,Synechococcaceae,Synechococcus	0.9912561663838352,0.9913704255075498,0.9923055736880114
SRR6754099_k141_1613799_extended_circular	SRR6754099_k141_1613799_extended_circular	1	127805	circular	Rimov	1	dsDNA,Podoviridae,Cba41virus	0.9983353137681322,0.9986948235883839,0.9990246912899973	Bacteria,Flavobacteriaceae,Cellulophaga	0.9985398003078259,0.9992924566885337,0.9992973522759063
ERR3687821_contig-140_29_self_circular	ERR3687821_contig-140_29_self_circular,ERR3687822_contig-140_23_self_circular	2	127297	circular	Lake_Rotsee	1	dsDNA,Podoviridae,Cba41virus	0.9962838822500729,0.997454275477343,0.997264176415162	Bacteria,Flavobacteriaceae,Cellulophaga	0.9973590117999921,0.9982209171070068,0.9983366333198154
SRR6475630_k141_481800_extended_circular	SRR6475630_k141_481800_extended_circular	1	127221	circular	Zurich	1	dsDNA,Siphoviridae,T4virus	0.9933902988588211,0.9910340055202026,0.9901945658223175	Bacteria,Mycobacteriaceae,Mycobacterium	0.9958467184971783,0.9952394195690939,0.995740740339136
SRR6754094_k141_4243963_self_circular	SRR6754092_k141_2093966_extended_partial,SRR6754094_k141_4243963_self_circular,SRR6754086_k141_3410258_extended_partial,SRR6754094_k141_3528225_extended_partial,SRR6754088_k141_3325576_extended_circular,SRR6754096_k141_81476_extended_partial,SRR6754098_k141_242288_extended_circular	7	61372	circular	Rimov	1	dsDNA,Siphoviridae,P12002virus	0.9845568123220411,0.990239550313132,0.99088334315989	Bacteria,Flavobacteriaceae,Synechococcus	0.9891455858557954,0.9945727747149378,0.9945458054750137
SRR9302957_k141_1138199_extended_partial	SRR9302957_k141_1138199_extended_partial	1	126998	high-quality	Lugu	1	dsDNA,Podoviridae,Cba41virus	0.9987136515481021,0.9990037783911336,0.9992506102567211	Bacteria,Flavobacteriaceae,Cellulophaga	0.9990196929634161,0.9995010388208156,0.9994947008650807
SRR6754086_k141_594435_self_circular	SRR6754086_k141_594435_self_circular	1	126996	circular	Rimov	1	dsDNA,Podoviridae,Cba41virus	0.99558325673161,0.9975236326779603,0.9975479526782418	Bacteria,Flavobacteriaceae,Cellulophaga	0.9971206440664588,0.9983252081731477,0.9984775965977971
SRR9302962_k141_1567201_extended_partial	SRR9302962_k141_1567201_extended_partial	1	126631	high-quality	Erhai	1	dsDNA,Myoviridae,M12virus	0.9974188955899828,0.9915888631251408,0.9930378386718168	Bacteria,Enterobacteriaceae,Synechococcus	0.997883105094913,0.9969796489276425,0.9972089270959613
SRR9214416_k141_1021809_extended_partial	SRR9214416_k141_1021809_extended_partial,SRR9214414_k141_271090_extended_partial	2	126496	high-quality	Jiricka_pond	1	dsDNA,Podoviridae,Cba41virus	0.9983269062619107,0.9986664501881314,0.9989475482281892	Bacteria,Flavobacteriaceae,Cellulophaga	0.9985587434389676,0.9992351988482995,0.9992583162912345
SRR9302957_k141_885179_extended_circular	SRR9302957_k141_885179_extended_circular	1	126137	circular	Lugu	1	dsDNA,Myoviridae,T4virus	0.9896069210591216,0.990512250215559,0.9914095690457955	Bacteria,Synechococcaceae,Synechococcus	0.9911867082363156,0.9961862188558248,0.9963110994485083
ERS4600487_contig-140_1313_extended_partial	ERS4600487_contig-140_1313_extended_partial	1	126133	high-quality	Loclat	1	dsDNA,Siphoviridae,Prasinovirus	0.8175949487702621,0.8728099281680084,0.9192780511458499	Bacteria,Enterobacteriaceae,Mycobacterium	0.8191294052646119,0.9208573952590509,0.9286096900325951
SRR6754101_k141_398958_extended_circular	SRR6754101_k141_398958_extended_circular	1	125994	circular	Rimov	1	dsDNA,Myoviridae,T4virus	0.991806885187095,0.9923738605321274,0.9920156931028592	Bacteria,Bacillaceae,Bacillus	0.9947417025139114,0.9958549413516122,0.9960725462088469
SRR6754102_k141_2459892_extended_partial	SRR6754102_k141_2459892_extended_partial	1	125936	high-quality	Rimov	1	dsDNA,Myoviridae,T4virus	0.9965977624823442,0.9969277912726573,0.9970602983232405	Bacteria,Enterobacteriaceae,Cellulophaga	0.9971837878369312,0.9981616143439069,0.9983149466616643
ERS4600337_contig-140_39	ERS4600337_contig-140_39	1	125921	high-quality	Alinen_Mustajärvi	1	dsDNA,Siphoviridae,Vegasvirus	0.9585005492904065,0.9672429094084619,0.9775127974829321	Bacteria,Bacillaceae,Bacillus	0.9663617348750937,0.9654367137271582,0.9692634994025325
SRR9214418_k141_1321959_self_circular	SRR9214418_k141_1321959_self_circular	1	125903	circular	Jiricka_pond	1	dsDNA,Siphoviridae,T4virus	0.9918755464879044,0.9859362512748326,0.9792567817016657	Bacteria,Enterobacteriaceae,Streptomyces	0.994421247878764,0.9898367333584177,0.9898029333373816
SRR6754088_k141_128659_extended_circular	SRR6754088_k141_128659_extended_circular	1	125885	circular	Rimov	1	dsDNA,Siphoviridae,Phicbkvirus	0.9845568123220411,0.9858889622744118,0.9873678236289198	Bacteria,Bacillaceae,Bacillus	0.9888772248312877,0.9924440100119424,0.9933703886032275
SRR6754100_NODE_3560_length_20862_cov_13.429274_extended_circular	SRR6754100_NODE_3560_length_20862_cov_13.429274_extended_circular	1	125879	circular	Rimov	1	dsDNA,Myoviridae,M12virus	0.9916121112929623,0.9903057549137212,0.9903295661804817	Bacteria,Enterobacteriaceae,Bacillus	0.9936808871699752,0.9952210152633043,0.9954956811020292
SRR9214418_k141_1243414_self_circular	SRR9214418_k141_1243414_self_circular	1	125361	circular	Jiricka_pond	1	dsDNA,Podoviridae,Cba41virus	0.9934799789251844,0.9960939285652359,0.9962337655181535	Bacteria,Flavobacteriaceae,Cellulophaga	0.9954204980464896,0.9977117313134949,0.997952779470542
SRR9214416_k141_76562_extended_partial	SRR9214416_k141_76562_extended_partial	1	125226	high-quality	Jiricka_pond	1	dsDNA,Podoviridae,Cba41virus	0.9977257695670695,0.9983622242854238,0.9983992814674815	Bacteria,Flavobacteriaceae,Cellulophaga	0.9981719878448242,0.9989018764212214,0.9989416910822293
ERS4600330_contig-140_106_extended_circular	ERS4600330_contig-140_106_extended_circular	1	125206	circular	Alinen_Mustajärvi	1	dsDNA,Podoviridae,Cba41virus	0.9949723112795104,0.996041910664773,0.9963687658763176	Bacteria,Flavobacteriaceae,Cellulophaga	0.99638028335767,0.9977015066991674,0.9979159121516852
SRR6754097_k141_958330_extended_partial	SRR6754097_k141_958330_extended_partial	1	124892	high-quality	Rimov	1	dsDNA,Podoviridae,Cba41virus	0.9986632065107728,0.9987878252892116,0.9991541814294609	Bacteria,Flavobacteriaceae,Cellulophaga	0.9986897667626978,0.999462185286371,0.9994383155538881
ERS4600484_contig-140_26	ERS4600484_contig-140_26	1	124825	high-quality	Loclat	1	dsDNA,Siphoviridae,T4virus	0.9960078357957984,0.9926481367345684,0.9908475267383362	Bacteria,Streptomycetaceae,Streptomyces	0.9967544101977189,0.9962209825445384,0.9964824240479014
SRR9214418_k141_1231960_extended_circular	SRR9214418_k141_1231960_extended_circular	1	124319	circular	Jiricka_pond	1	dsDNA,Podoviridae,Cba41virus	0.9984838463780463,0.9989028951902358,0.9992065285071164	Bacteria,Flavobacteriaceae,Cellulophaga	0.9986913453569596,0.9994417360577159,0.9994274722248125
ERS4600330_contig-140_9_self_circular	ERS4600330_contig-140_9_self_circular	1	124315	circular	Alinen_Mustajärvi	1	dsDNA,Myoviridae,Bxz1virus	0.993863921709302,0.9967055329706792,0.996685603451601	Bacteria,Mycobacteriaceae,Mycobacterium	0.9965018351158293,0.9979080439085838,0.9980677187587425
SRR9302957_k141_452046_self_circular	SRR9302957_k141_452046_self_circular	1	124062	circular	Lugu	1	dsDNA,Siphoviridae,T4virus	0.991240779768177,0.9930343302380056,0.9923022244752894	Bacteria,Bacillaceae,Bacillus	0.9947401239196495,0.9963109591506208,0.9965886886728416
SRR9214416_k141_506509_self_circular	SRR9214416_k141_506509_self_circular	1	122958	circular	Jiricka_pond	1	dsDNA,Podoviridae,Cba41virus	0.9957976481402596,0.9968868074722926,0.9969032570902739	Bacteria,Flavobacteriaceae,Cellulophaga	0.9969391057263507,0.9982004678783516,0.9983626573095966
SRR6475632_k141_411173_extended_partial	SRR6475632_k141_411173_extended_partial	1	122866	high-quality	Zurich	1	dsDNA,Podoviridae,Cba41virus	0.9980270385400085,0.9985498039870933,0.9987849967765221	Bacteria,Flavobacteriaceae,Cellulophaga	0.9983582619677177,0.9990511557904036,0.9990696423653205
SRR6754100_NODE_110_length_122469_cov_11.600971_self_circular	SRR6754094_k141_533487_extended_partial,SRR6754086_k141_996099_extended_circular,SRR6754100_NODE_110_length_122469_cov_11.600971_self_circular	3	122342	circular	Rimov	1	dsDNA,Podoviridae,Cba41virus	0.9983885613075354,0.998805164589366,0.9991624467575118	Bacteria,Flavobacteriaceae,Cellulophaga	0.9985950511069892,0.999349714528768,0.9993494002554688
SRR9302965_k141_835426_extended_partial	SRR9302965_k141_835426_extended_partial	1	122750	high-quality	Dianchi	1	dsDNA,Podoviridae,Cba41virus	0.9985062663946371,0.9988130460894361,0.9991762223042633	Bacteria,Flavobacteriaceae,Cellulophaga	0.9987276530249812,0.9994212868290608,0.9994014482350313
ERS4600468_contig-140_14_self_circular	ERS4600468_contig-140_14_self_circular,ERS4600473_contig-140_10_self_circular,ERS4600472_contig-140_31_self_circular,ERS4600471_contig-140_21_self_circular,ERS4600469_contig-140_22_self_circular,ERS4600470_contig-140_9_self_circular	6	122696	circular	Loclat	1	dsDNA,Siphoviridae,T4virus	0.9949484900118826,0.9928656661365044,0.9885332348840925	Bacteria,Mycobacteriaceae,Mycobacterium	0.996678637673152,0.9953580250952934,0.9956409817116412
SRR9214416_k141_877616_extended_partial	SRR9214416_k141_877616_extended_partial	1	122544	high-quality	Jiricka_pond	1	dsDNA,Podoviridae,Cba41virus	0.9988061341165393,0.9990715592917369,0.9992754062408737	Bacteria,Flavobacteriaceae,Cellulophaga	0.999078100951103,0.9995030837436812,0.999499038196711
ERS4600475_contig-140_8_self_circular	ERS4600475_contig-140_8_self_circular,ERS4600478_contig-140_15_self_circular,ERS4600477_contig-140_19_self_circular,ERS4600476_contig-140_12_self_circular	4	122524	circular	Loclat	1	dsDNA,Siphoviridae,Phicbkvirus	0.9216196219985203,0.9353433260245556,0.9669111367030158	Bacteria,Mycobacteriaceae,Mycobacterium	0.9525221989818067,0.9715919315523418,0.9751731137486906
SRR9302963_k141_663524_extended_circular	SRR9302963_k141_663524_extended_circular	1	122461	circular	Xingyun	1	dsDNA,Podoviridae,Cba41virus	0.9981755711499226,0.9984993623866443,0.9986995883866631	Bacteria,Flavobacteriaceae,Cellulophaga	0.9984277201152374,0.9990143471788244,0.9990392810439089
SRR6754099_k141_1461820_self_circular	SRR6754099_k141_1461820_self_circular	1	122310	circular	Rimov	1	dsDNA,Podoviridae,Cba41virus	0.998546902674708,0.9989186581903761,0.9992147938351673	Bacteria,Flavobacteriaceae,Cellulophaga	0.9988081613323335,0.999470364977833,0.9994469902171486
ERR3687824_contig-140_3018_extended_circular	ERR3687826_contig-140_1839_extended_partial,ERR3687824_contig-140_3018_extended_circular,ERR3687830_contig-140_741_extended_partial,ERR3687829_contig-140_1040_extended_partial	4	122157	circular	Lake_Rotsee	1	dsDNA,Podoviridae,Cba41virus	0.9986281752348497,0.9990715592917369,0.9992946920063257	Bacteria,Flavobacteriaceae,Cellulophaga	0.9987892182011918,0.9994969489750847,0.9994708455411146
SRR5896114_k141_1822966_extended_circular	SRR5896114_k141_1822966_extended_circular	1	122218	circular	Baikal	1	dsDNA,Podoviridae,Cba41virus	0.9984642288635294,0.9987752148890994,0.9991541814294609	Bacteria,Flavobacteriaceae,Cellulophaga	0.998662930660247,0.9993844782174817,0.99937542424525
ERS4600492_contig-140_42_extended_circular	ERS4600492_contig-140_42_extended_circular	1	122206	circular	Loclat	1	dsDNA,Podoviridae,Cba41virus	0.9979317534694976,0.9985182779868127,0.9987381599175671	Bacteria,Flavobacteriaceae,Cellulophaga	0.9983045897628162,0.9991104585535033,0.9991043410183621
ERS4600332_contig-140_6_self_circular	ERS4600332_contig-140_6_self_circular,ERS4600333_contig-140_60_self_circular	2	121927	circular	Alinen_Mustajärvi	1	dsDNA,Myoviridae,T4virus	0.9881622312400511,0.9914627591240186,0.9922498773976339	Bacteria,Bacillaceae,Bacillus	0.992620071826039,0.9966994944950677,0.9970592891547191
SRR6754103_k141_1520013_extended_partial	SRR6754103_k141_1520013_extended_partial	1	121581	high-quality	Rimov	1	dsDNA,Podoviridae,Bpp1virus	0.9982624487142121,0.9985624143872055,0.9986665270744596	Bacteria,Flavobacteriaceae,Cellulophaga	0.9985461146848731,0.9992004351595858,0.9991954249825965
SRR9302961_k141_910957_extended_partial	SRR9302961_k141_910957_extended_partial	1	121321	high-quality	Erhai	1	dsDNA,Siphoviridae,T4virus	0.9947579198708607,0.992405386532408,0.9903047701963291	Bacteria,Streptomycetaceae,Streptomyces	0.9963202967757212,0.9963068693048899,0.996638567986589
ERS4600551_contig-140_273_extended_partial	ERS4600551_contig-140_273_extended_partial,ERS4600547_contig-140_50	2	121220	circular	Mekkojärvi	1	dsDNA,Siphoviridae,Pandoravirus	0.9884060489204762,0.8944430695605433,0.9247304125500742	Bacteria,Rhodobacteraceae,Rhodovulum	0.9935703855716485,0.9594471346540808,0.9575266800111903
ERS4600333_contig-140_61	ERS4600333_contig-140_61,ERS4600332_contig-140_7,ERS4600330_contig-140_14	3	121104	high-quality	Alinen_Mustajärvi	1	dsDNA,Siphoviridae,T4virus	0.9729026074479296,0.9844230032613648,0.9877673144847119	Bacteria,Flavobacteriaceae,Cellulophaga	0.9833237302182407,0.99323744008376,0.9938952057304825
ERR2814753_NODE_32_length_110022_cov_24.126730_extended_circular	ERR2814753_NODE_32_length_110022_cov_24.126730_extended_circular	1	120931	circular	Soyang	1	dsDNA,Siphoviridae,T4virus	0.9961829921754142,0.9942685731489903,0.9915307938572082	Bacteria,Streptomycetaceae,Streptomyces	0.9970496073246774,0.9967547074124364,0.9969703738562998
SRR7054681_k141_2358309_extended_partial	SRR7054681_k141_2358309_extended_partial	1	120829	high-quality	Zurich	1	dsDNA,Podoviridae,Cba41virus	0.9983689437930184,0.9988366905896465,0.9991872427416644	Bacteria,Flavobacteriaceae,Cellulophaga	0.9985855795414184,0.9994028825232713,0.999394942237586
SRR9302957_k141_739038	SRR9302957_k141_739038	1	120583	high-quality	Lugu	1	dsDNA,Myoviridae,T4virus	0.9974048830796135,0.9977994851804154,0.9974157074294279	Bacteria,Bacillaceae,Bacillus	0.9980251785784758,0.998370196476189,0.9985166325824689
SRR9302963_k141_738810_extended_circular	SRR9302963_k141_738810_extended_circular	1	120400	circular	Xingyun	1	dsDNA,Podoviridae,Cba41virus	0.998321301257763,0.9988571824898289,0.9991955080697152	Bacteria,Flavobacteriaceae,Cellulophaga	0.9985587434389676,0.9993681188345576,0.9993645809161745
SRR6754102_k141_219416_extended_partial	SRR6754102_k141_219416_extended_partial	1	120114	high-quality	Rimov	1	dsDNA,Podoviridae,Cba41virus	0.9982316211913996,0.9987216206886225,0.9990384668367488	Bacteria,Flavobacteriaceae,Cellulophaga	0.9984877066971861,0.9992924566885337,0.9992973522759063
SRR6754086_k141_1375028_extended_circular	SRR6754094_k141_2515497_extended_partial,SRR6754086_k141_1375028_extended_circular	2	119445	circular	Rimov	1	dsDNA,Podoviridae,Cba41virus	0.9981545523843688,0.9986238900877527,0.9988786704944319	Bacteria,Flavobacteriaceae,Cellulophaga	0.9983882552586921,0.9991840757766617,0.9991910876509662
SRR9214415_k141_424977_extended_circular	SRR9214415_k141_424977_extended_circular	1	118874	circular	Jiricka_pond	1	dsDNA,Podoviridae,Cba41virus	0.9973838643140596,0.9981494237835299,0.9982449953438652	Bacteria,Flavobacteriaceae,Cellulophaga	0.9980204427956905,0.9987362376691151,0.9987768724802814
SRR9214418_k141_1076943_self_circular	SRR9214418_k141_1076943_self_circular	1	118729	circular	Jiricka_pond	1	dsDNA,Podoviridae,Cba41virus	0.9986239714817389,0.9989501841906566,0.9992285693819187	Bacteria,Flavobacteriaceae,Cellulophaga	0.9988255258692135,0.9994540055949089,0.9994339782222579
SRR6754094_k141_3236383_extended_partial	SRR6754094_k141_3236383_extended_partial	1	118630	circular	Rimov	1	dsDNA,Podoviridae,Cba41virus	0.9983633387888707,0.9988571824898289,0.9992092836164668	Bacteria,Flavobacteriaceae,Cellulophaga	0.9985966297012511,0.9994294665205229,0.9994036169008464
SRR6754101_k141_806351_extended_partial	SRR6754101_k141_806351_extended_partial	1	118301	high-quality	Rimov	1	dsDNA,Podoviridae,Cba41virus	0.9985272851601911,0.9989817101909372,0.9992368347099696	Bacteria,Flavobacteriaceae,Cellulophaga	0.9987923753897154,0.9994683200549676,0.9994491588829636
SRR7054681_k141_202512_extended_partial	SRR7054681_k141_202512_extended_partial	1	118129	high-quality	Zurich	1	dsDNA,Podoviridae,Cba41virus	0.9994409008362666,0.9995870093963244,0.9997851014706773	Bacteria,Flavobacteriaceae,Cellulophaga	0.999617980188642,0.9998261815564317,0.9998481933929427
ERS4600331_contig-140_5_self_circular	ERS4600332_contig-140_16_extended_partial,ERS4600333_contig-140_102_extended_partial,ERS4600331_contig-140_5_self_circular	3	117834	circular	Alinen_Mustajärvi	1	dsDNA,Podoviridae,Cba41virus	0.9974146918368719,0.9983370034851994,0.9984075467955323	Bacteria,Flavobacteriaceae,Cellulophaga	0.9980599076522357,0.9988487084267181,0.9988592817812554
ERR3687830_contig-140_1526_extended_partial	ERR3687830_contig-140_1526_extended_partial,ERR3687826_contig-140_292_extended_partial	2	117684	high-quality	Lake_Rotsee	1	dsDNA,Podoviridae,Cba41virus	0.9983325112660584,0.9988540298898009,0.9992010182884159	Bacteria,Flavobacteriaceae,Cellulophaga	0.9985587434389676,0.9994315114433884,0.9994122915641068
ERS4600472_contig-140_33_self_circular	ERS4600472_contig-140_33_self_circular	1	117141	circular	Loclat	1	dsDNA,Podoviridae,Cba41virus	0.9982470349528059,0.9986286189877948,0.9988621398383302	Bacteria,Flavobacteriaceae,Cellulophaga	0.9984608705947354,0.9990777397876552,0.9990978350209168
SRR6475632_k141_4410887_extended_partial	SRR6475632_k141_4410887_extended_partial	1	117028	high-quality	Zurich	1	dsDNA,Siphoviridae,Sitaravirus	0.9975127794094568,0.9978515030808783,0.9978785658002766	Bacteria,Streptomycetaceae,Streptomyces	0.998066222029283,0.9985603743026813,0.9986619331920809
SRR6754103_k141_1808763_extended_partial	SRR6754103_k141_1808763_extended_partial	1	117014	high-quality	Rimov	1	dsDNA,Podoviridae,Cba41virus	0.9967014550590767,0.9974353598771747,0.9975341771314904	Bacteria,Flavobacteriaceae,Cellulophaga	0.9975784364023836,0.998499026616716,0.9985925358859976
ERR3687824_contig-140_23_self_circular	ERR3687824_contig-140_23_self_circular	1	116348	circular	Lake_Rotsee	1	dsDNA,Podoviridae,Cba41virus	0.9981055085980763,0.9985813299873738,0.9988373438541776	Bacteria,Flavobacteriaceae,Cellulophaga	0.9983882552586921,0.9990593354818657,0.9990869916918412
ERS4600469_contig-140_26	ERS4600469_contig-140_26,ERS4600472_contig-140_35	2	116055	high-quality	Loclat	1	dsDNA,Siphoviridae,T4virus	0.997452525614869,0.9953215415583617,0.9921203872581703	Bacteria,Enterobacteriaceae,Synechococcus	0.9980551718694503,0.9970225923078182,0.9973976010218754
ERR3687828_contig-140_29_extended_circular	ERR3687829_contig-140_18_extended_partial,ERR3687828_contig-140_29_extended_circular	2	115909	circular	Lake_Rotsee	1	dsDNA,Siphoviridae,Sitaravirus	0.9977061520525525,0.998266069984568,0.9983083628589219	Bacteria,Streptomycetaceae,Streptomyces	0.9981846165989187,0.9986319466029742,0.9986988005109376
SRR9302963_k141_631279_extended_partial	SRR9302963_k141_631279_extended_partial	1	116022	high-quality	Xingyun	1	dsDNA,Podoviridae,Cba41virus	0.998622570230702,0.9989312685904883,0.9992451000380205	Bacteria,Flavobacteriaceae,Cellulophaga	0.9988302616519988,0.999462185286371,0.9994426528855183
ERS4600547_contig-140_232_extended_partial	ERS4600547_contig-140_232_extended_partial	1	115602	high-quality	Mekkojärvi	1	dsDNA,Myoviridae,Simplexvirus	0.8530928412887026,0.8000400380203564,0.8645588243397381	Bacteria,Mycobacteriaceae,Mycobacterium	0.8805777654998224,0.8289831007574394,0.8334356220709457
ERS4600475_contig-140_14_self_circular	ERS4600477_contig-140_24_extended_circular,ERS4600475_contig-140_14_self_circular,ERS4600476_contig-140_14_self_circular,ERS4600474_contig-140_16_self_circular	4	115111	circular	Loclat	1	dsDNA,Siphoviridae,Sitaravirus	0.9966916463018183,0.9966030734697674,0.996476215140979	Bacteria,Streptomycetaceae,Streptomyces	0.9975405501401002,0.9979428075972975,0.9980742247561878
SRR9302958_k141_1402019_extended_circular	SRR9302958_k141_1402019_extended_circular	1	115136	circular	Lugu	1	dsDNA,Myoviridae,T4virus	0.9971344416294868,0.9981510000835438,0.9981623420633565	Bacteria,Rhodothermaceae,Rhodothermus	0.9977094597261139,0.9985971829142605,0.9986749451869715
SRR9214414_k141_749983_extended_partial	SRR9214414_k141_749983_extended_partial	1	115094	circular	Jiricka_pond	1	dsDNA,Podoviridae,Cba41virus	0.9983815550523507,0.9987452651888329,0.9991211201172574	Bacteria,Flavobacteriaceae,Cellulophaga	0.998588736729942,0.9993435797601714,0.9993494002554688
SRR9214414_k141_685767_extended_circular	SRR9214414_k141_685767_extended_circular	1	115028	circular	Jiricka_pond	1	dsDNA,Podoviridae,Cba41virus	0.9975380019281215,0.9984473444861813,0.9986004044500526	Bacteria,Flavobacteriaceae,Cellulophaga	0.9981025296973045,0.9989529994928591,0.9989785584010861
ERS4600469_contig-140_2405_extended_circular	ERS4600469_contig-140_2405_extended_circular,ERS4600468_contig-140_72_extended_partial,ERS4600471_contig-140_250_extended_partial,ERS4600472_contig-140_158_extended_partial,ERS4600473_contig-140_51_extended_partial	5	114820	circular	Loclat	1	dsDNA,Podoviridae,Cba41virus	0.9983044862453199,0.9986333478878368,0.9989255073533868	Bacteria,Flavobacteriaceae,Cellulophaga	0.9984861281029244,0.9992106597739133,0.9992214489723777
ERS4600473_contig-140_12_self_circular	ERS4600469_contig-140_1242_extended_partial,ERS4600468_contig-140_615_extended_partial,ERS4600471_contig-140_26_extended_circular,ERS4600472_contig-140_344_extended_circular,ERS4600470_contig-140_59_extended_partial,ERS4600473_contig-140_12_self_circular	6	114539	circular	Loclat	1	dsDNA,Podoviridae,Cba41virus	0.9982526399569536,0.9986979761884119,0.9990302015086979	Bacteria,Flavobacteriaceae,Cellulophaga	0.9984498204349027,0.9992188394653754,0.9992366296330835
SRR6754102_k141_2342693_extended_partial	SRR6754102_k141_2342693_extended_partial	1	114691	high-quality	Rimov	1	dsDNA,Podoviridae,Cba41virus	0.9965697374616057,0.997395952376824,0.9974763198351343	Bacteria,Flavobacteriaceae,Cellulophaga	0.9973937408737519,0.9984192746249612,0.99853831924062
SRR6754103_k141_209549_self_circular	SRR6754103_k141_209549_self_circular	1	114585	circular	Rimov	1	dsDNA,Siphoviridae,T4virus	0.9947411048584176,0.9891802767037045,0.986020575156628	Bacteria,Bacillaceae,Bacillus	0.9963408185011248,0.9940288252327122,0.9944503841791491
SRR9302961_k141_3232663	SRR9302961_k141_3232663	1	114515	high-quality	Erhai	1	dsDNA,Siphoviridae,Sitaravirus	0.9982190099320674,0.9985167016867986,0.9986472413090075	Bacteria,Streptomycetaceae,Streptomyces	0.9984624491889972,0.9989345951870695,0.99895470307712
SRR6754087_k141_2084657_extended_partial	SRR6754087_k141_2084657_extended_partial	1	114380	high-quality	Rimov	1	dsDNA,Siphoviridae,Sitaravirus	0.99837735129924,0.9985167016867986,0.9986582617464087	Bacteria,Streptomycetaceae,Streptomyces	0.998563479221753,0.9990061674873624,0.9990327750464637
SRR9214416_k141_327643_extended_partial	SRR9214416_k141_327643_extended_partial	1	114230	high-quality	Jiricka_pond	1	dsDNA,Myoviridae,M12virus	0.9977958321189158,0.9947052082528763,0.9953411100886594	Bacteria,Enterobacteriaceae,Synechococcus	0.998165673467777,0.9974929245668853,0.9977641055446279
SRR6754095_k141_2431676_extended_partial	SRR6754095_k141_2431676_extended_partial	1	113924	high-quality	Rimov	1	dsDNA,Podoviridae,Cba41virus	0.9975674281998969,0.9983102063849608,0.9984929551853913	Bacteria,Flavobacteriaceae,Cellulophaga	0.9981246300169699,0.9989161908812799,0.99895470307712
ERR3687824_contig-140_87_extended_partial	ERR3687824_contig-140_87_extended_partial	1	113767	high-quality	Lake_Rotsee	1	dsDNA,Siphoviridae,Sitaravirus	0.9982988812411722,0.9985592617871775,0.9987602007923695	Bacteria,Streptomycetaceae,Streptomyces	0.9985492718733967,0.9990470659446725,0.9990696423653205
ERS4600335_contig-140_43_self_circular	ERS4600334_contig-140_69_extended_circular,ERS4600335_contig-140_43_self_circular	2	113704	circular	Alinen_Mustajärvi	1	dsDNA,Podoviridae,Cba41virus	0.9973922718202811,0.9983023248848907,0.9984571387638376	Bacteria,Flavobacteriaceae,Cellulophaga	0.9980330715497849,0.998824169352332,0.9988571131154402
ERS4600473_contig-140_39_extended_circular	ERS4600473_contig-140_39_extended_circular,ERS4600468_contig-140_26_extended_partial	2	113651	circular	Loclat	1	dsDNA,Podoviridae,Cba41virus	0.9985062663946371,0.9989044714902497,0.9992010182884159	Bacteria,Flavobacteriaceae,Cellulophaga	0.998688188168436,0.9994028825232713,0.9993906049059558
SRR9214416_k141_35212_extended_circular	SRR9214416_k141_35212_extended_circular	1	113573	circular	Jiricka_pond	1	dsDNA,Podoviridae,Cba41virus	0.9983801538013138,0.9987389599887767,0.9990246912899973	Bacteria,Flavobacteriaceae,Cellulophaga	0.9985761079758475,0.9993108609943233,0.9993147016024272
SRR9302959_k141_2292912_extended_partial	SRR9302959_k141_2292912_extended_partial	1	113509	high-quality	Fuxian	1	dsDNA,Siphoviridae,Sitaravirus	0.997715960809811,0.9981115925831932,0.9981155052044015	Bacteria,Streptomycetaceae,Streptomyces	0.9981830380046569,0.9986462610630327,0.9987096438400132
SRR6754087_k141_2068866_extended_partial	SRR6754087_k141_2068866_extended_partial	1	113379	high-quality	Rimov	1	dsDNA,Podoviridae,Cba41virus	0.9984670313656032,0.9988130460894361,0.9991541814294609	Bacteria,Flavobacteriaceae,Cellulophaga	0.998655037688938,0.999361984065961,0.9993559062529142
SRR9302957_k141_201282_self_circular	SRR9302957_k141_201282_self_circular	1	113197	circular	Lugu	1	dsDNA,Siphoviridae,Sitaravirus	0.9974216980920566,0.9978704186810468,0.9979171373311807	Bacteria,Streptomycetaceae,Streptomyces	0.9980804293776392,0.9985133410767746,0.9986055478808882
SRR5896115_k141_562264_extended_partial	SRR5896115_k141_562264_extended_partial,SRR5896114_k141_355541	2	113162	high-quality	Baikal	1	dsDNA,Podoviridae,Cba41virus	0.9980718785731901,0.9985135490867706,0.998727139480166	Bacteria,Flavobacteriaceae,Cellulophaga	0.9983487904021469,0.9990020776416314,0.9990262690490184
SRR6754095_k141_2265778_extended_circular	SRR6754101_k141_116189_extended_partial,SRR6754095_k141_2265778_extended_circular	2	108866	circular	Rimov	1	dsDNA,Siphoviridae,Sitaravirus	0.9990737730645921,0.999188205492775,0.9993801003961847	Bacteria,Streptomycetaceae,Streptomyces	0.9992454319428549,0.9995153532808743,0.9995033755283412
SRR9214416_k141_814840_extended_partial	SRR9214416_k141_814840_extended_partial	1	113031	circular	Jiricka_pond	1	dsDNA,Siphoviridae,Sitaravirus	0.9991564468757707,0.9992670204934765,0.9994544883486426	Bacteria,Streptomycetaceae,Streptomyces	0.9993338332215163,0.9996237341927463,0.9996074714874662
ERS4600321_contig-140_26_self_circular	ERS4600321_contig-140_26_self_circular	1	113009	circular	Alinen_Mustajärvi	1	dsDNA,Myoviridae,T4virus	0.9824241082438401,0.9865982972807249,0.985621084300836	Bacteria,Bacillaceae,Bacillus	0.9891250641303919,0.9929020727338165,0.9933248466211102
SRR4449240_contig-140_0_self_circular	SRR4449240_contig-140_0_self_circular	1	112893	circular	Lough_Neagh	1	dsDNA,Myoviridae,T4virus	0.9889231105531018,0.990132361912178,0.9875606812834401	Bacteria,Bacillaceae,Bacillus	0.9934440980307037,0.9954295973955862,0.9953308625000813
SRR8894382_k141_2058263_self_circular	SRR8894382_k141_2058263_self_circular,SRR8894379_k141_3101039_self_circular	2	112741	circular	Fuxian	1	dsDNA,Myoviridae,Phicbkvirus	0.9974118893347981,0.9961869302660636,0.9920432441963621	Bacteria,Enterobacteriaceae,Pseudomonas	0.9979462488653854,0.9969735141590459,0.9970029038435264
SRR9302960_k141_2380190_extended_circular	SRR9302960_k141_2380190_extended_circular	1	112706	circular	Fuxian	1	dsDNA,Podoviridae,Cba41virus	0.9982456337017689,0.9986207374877246,0.9988373438541776	Bacteria,Flavobacteriaceae,Cellulophaga	0.9984324558980228,0.999132952705024,0.9991520516662944
ERS4600313_contig-140_19_self_circular	ERS4600402_contig-140_160_extended_partial,ERS4600369_contig-140_95_extended_partial,ERS4600313_contig-140_19_self_circular,ERS4600387_contig-140_3_self_circular,ERS4600314_contig-140_997_extended_circular,ERS4600403_contig-140_13_self_circular,ERS4600386_contig-140_12_self_circular,ERS4600385_contig-140_18_self_circular,ERS4600370_contig-140_0_self_circular,ERS4600389_contig-140_107_extended_cir…	15	111297	circular	SAS2	1	dsDNA,Siphoviridae,Prtbvirus	0.9905934017891174,0.99067303281699,0.9915445694039596	Bacteria,Mycobacteriaceae,Mycobacterium	0.9946296223213229,0.9964806877484581,0.9965062793718676
ERR3687828_contig-140_25_self_circular	ERR3687824_contig-140_2805_extended_circular,ERR3687826_contig-140_675_extended_circular,ERR3687828_contig-140_25_self_circular,ERR3687830_contig-140_17_extended_circular,ERR3687829_contig-140_79_extended_circular	5	111680	circular	Lake_Rotsee	1	dsDNA,Podoviridae,Cba41virus	0.9983731475461292,0.9987011287884401,0.9990164259619464	Bacteria,Flavobacteriaceae,Cellulophaga	0.998563479221753,0.9992536031540891,0.9992409669647137
SRR6754088_k141_2611088_extended_circular	SRR6754088_k141_2611088_extended_circular,SRR6754086_k141_167219_extended_partial	2	112236	circular	Rimov	1	dsDNA,Podoviridae,Cba41virus	0.9979934085151223,0.9985103964867426,0.9987050986053636	Bacteria,Flavobacteriaceae,Cellulophaga	0.9982082955128458,0.9989816284129762,0.9990024137250522
SRR9302960_k141_2167552_extended_partial	SRR9302960_k141_2167552_extended_partial	1	111901	high-quality	Fuxian	1	dsDNA,Siphoviridae,Sitaravirus	0.9977790171064727,0.9982676462845821,0.9983028526402213	Bacteria,Streptomycetaceae,Streptomyces	0.9982603891234856,0.9987505521291737,0.9987877158093569
SRR5338504_k141_1538008_extended_partial	SRR5338504_k141_1538008_extended_partial	1	111156	high-quality	Tous	1	dsDNA,Podoviridae,Cba41virus	0.9983269062619107,0.9986333478878368,0.9989392829001383	Bacteria,Flavobacteriaceae,Cellulophaga	0.9985208571766842,0.9992433785397615,0.9992648222886797
ERR3687821_contig-140_636_extended_partial	ERR3687821_contig-140_636_extended_partial	1	110764	high-quality	Lake_Rotsee	1	dsDNA,Siphoviridae,Sitaravirus	0.9967897338744031,0.9971957622750423,0.9971539720411503	Bacteria,Streptomycetaceae,Streptomyces	0.9976400015785942,0.9981759288039656,0.9983388019856304
ERR3687830_contig-140_2045_extended_partial	ERR3687830_contig-140_2045_extended_partial	1	110676	high-quality	Lake_Rotsee	1	dsDNA,Siphoviridae,Sitaravirus	0.9978224558886174,0.9984047843858026,0.9985508124817474	Bacteria,Streptomycetaceae,Streptomyces	0.9982603891234856,0.9987894056636184,0.9988115711333231
SRR6754100_NODE_158_length_104494_cov_7.462474_self_circular	SRR6754094_k141_2521436,SRR6754100_NODE_158_length_104494_cov_7.462474_self_circular,SRR6754092_k141_3107277_self_circular,SRR6754101_k141_3690115_self_circular,SRR6754088_k141_2717219_self_circular,SRR6754096_k141_592141_self_circular,SRR6754097_k141_1829211_self_circular,SRR6754102_k141_2770890_self_circular,SRR6754098_k141_2312211_self_circular	9	104367	circular	Rimov	1	dsDNA,Siphoviridae,Sitaravirus	0.9930792211286237,0.9928073430359854,0.993305084278795	Bacteria,Streptomycetaceae,Streptomyces	0.9959019692963416,0.9968589984785774,0.9971438671215082
SRR9302965_k141_195486_self_circular	SRR9302965_k141_195486_self_circular	1	110438	circular	Dianchi	1	dsDNA,Podoviridae,Cba41virus	0.9984488151021231,0.9987736385890854,0.9991376507733591	Bacteria,Flavobacteriaceae,Cellulophaga	0.9986234658037018,0.9993435797601714,0.9993472315896538
SRR6754099_k141_1775977_extended_partial	SRR6754099_k141_1775977_extended_partial	1	110262	high-quality	Rimov	1	dsDNA,Siphoviridae,Sitaravirus	0.9980788848283748,0.9983953265857184,0.9983992814674815	Bacteria,Streptomycetaceae,Streptomyces	0.9983424760250996,0.9988752924239698,0.9989113297608179
ERS4600468_contig-140_23_self_circular	ERS4600471_contig-140_334_extended_circular,ERS4600468_contig-140_23_self_circular,ERS4600472_contig-140_3058_extended_circular,ERS4600469_contig-140_28_self_circular,ERS4600470_contig-140_13_self_circular,ERS4600473_contig-140_14_self_circular	6	110231	circular	Loclat	1	dsDNA,Podoviridae,Cba41virus	0.9983675425419815,0.998644381987935,0.9989888748684436	Bacteria,Flavobacteriaceae,Cellulophaga	0.998563479221753,0.9992863219199372,0.9992930149442761
ERS4600454_contig-140_503_extended_partial	ERS4600454_contig-140_503_extended_partial	1	110087	high-quality	Lovojärvi	1	dsDNA,Siphoviridae,Phicbkvirus	0.9900553213909379,0.9786379822098781,0.9819898501771536	Bacteria,Enterobacteriaceae,Bacillus	0.9947401239196495,0.9924256057061528,0.9929670167616181
ERS4600569_NODE_1735_length_17858_cov_7.346230_extended_partial	ERS4600569_NODE_1735_length_17858_cov_7.346230_extended_partial	1	110030	circular	Björntjärnan	1	dsDNA,Siphoviridae,Sitaravirus	0.9994577158487097,0.9995539070960298,0.9997685708145756	Bacteria,Streptomycetaceae,Streptomyces	0.9996385019140456,0.9998159569421041,0.9998395187296824
SRR9214416_k141_741986_extended_circular	SRR9214416_k141_741986_extended_circular	1	109766	circular	Jiricka_pond	1	dsDNA,Podoviridae,Cba41virus	0.9975001681501244,0.9979508099817622,0.9980080559397403	Bacteria,Flavobacteriaceae,Cellulophaga	0.9980346501440467,0.9986973841346705,0.9987378364956095
SRR9214416_k141_1045402_extended_partial	SRR9214416_k141_1045402_extended_partial	1	109732	high-quality	Jiricka_pond	1	dsDNA,Siphoviridae,Phic31virus	0.9985875389547788,0.9988130460894361,0.9990164259619464	Bacteria,Mycobacteriaceae,Mycobacterium	0.9988586763487115,0.9992863219199372,0.9992930149442761
SRR5896114_k141_466411_extended_partial	SRR5896114_k141_466411_extended_partial	1	109608	high-quality	Baikal	1	dsDNA,Myoviridae,T4virus	0.9979317534694976,0.9983102063849608,0.9984791796386399	Bacteria,Enterobacteriaceae,Synechococcus	0.9983045897628162,0.9987750912035598,0.9986337405364846
SRR8894380_k141_401728_extended_partial	SRR8894380_k141_401728_extended_partial	1	109510	high-quality	Fuxian	1	dsDNA,Podoviridae,M12virus	0.9577817075084636,0.9794608108172013,0.9163218188129887	Bacteria,Enterobacteriaceae,Vibrio	0.9741836694423616,0.8652211788571335,0.8815084371943537
SRR9214416_k141_877178_extended_partial	SRR9214416_k141_877178_extended_partial	1	108909	high-quality	Jiricka_pond	1	dsDNA,Myoviridae,M12virus	0.9980886935856332,0.9966692780703565,0.9968564202313189	Bacteria,Enterobacteriaceae,Synechococcus	0.9983014325742926,0.9981493448067139,0.9982889226718831
ERR3687822_contig-140_1221_extended_partial	ERR3687822_contig-140_1221_extended_partial	1	108883	circular	Lake_Rotsee	1	dsDNA,Siphoviridae,Sitaravirus	0.997979396004753,0.9985167016867986,0.9987050986053636	Bacteria,Streptomycetaceae,Streptomyces	0.9983645763447649,0.9989386850328006,0.9989633777403804
SRR9214416_k141_469309_extended_partial	SRR9214416_k141_469309_extended_partial	1	108629	circular	Jiricka_pond	1	dsDNA,Siphoviridae,Sitaravirus	0.9991578481268076,0.9992228840930837,0.9993938759429362	Bacteria,Streptomycetaceae,Streptomyces	0.9993038399305418,0.9995930603497636,0.9995836161635
SRR6754101_k141_1696707_extended_partial	SRR6754101_k141_1696707_extended_partial	1	108617	high-quality	Rimov	1	dsDNA,Siphoviridae,Sitaravirus	0.9978042396251373,0.9983228167850731,0.9984736694199393	Bacteria,Streptomycetaceae,Streptomyces	0.998257231934962,0.9988527982724492,0.9988571131154402
ERS4600490_contig-140_4410_extended_partial	ERS4600490_contig-140_4410_extended_partial	1	108573	circular	Loclat	1	dsDNA,Siphoviridae,T4virus	0.9808154720534493,0.9770333087955965,0.9700960431119511	Bacteria,Mycobacteriaceae,Mycobacterium	0.983595248431272,0.9898633173556693,0.9878424594405276
ERS4600386_contig-140_14_extended_circular	ERS4600386_contig-140_14_extended_circular	1	108484	circular	SAS2	1	dsDNA,Siphoviridae,Sitaravirus	0.9991270206039953,0.999188205492775,0.9993470390839813	Bacteria,Streptomycetaceae,Streptomyces	0.9992896325821856,0.9995787458897051,0.9995640981711641
SRR6754087_k141_922965_self_circular	SRR6754087_k141_922965_self_circular,SRR6754089_k141_898054_extended_partial	2	108314	circular	Rimov	1	dsDNA,Podoviridae,Cba41virus	0.9953688653229603,0.9969435542727977,0.9971925435720543	Bacteria,Flavobacteriaceae,Cellulophaga	0.9971253798492442,0.9982618155643169,0.9983973559626382
SRR9214418_k141_473024	SRR9214418_k141_473024	1	108220	high-quality	Jiricka_pond	1	dsDNA,Myoviridae,T4virus	0.9965431136919042,0.9974653095774413,0.9972862172899642	Bacteria,Bacillaceae,Bacillus	0.9975421287343621,0.9983456574018028,0.9984949459243179
SRR9302965_k141_830119_extended_partial	SRR9302965_k141_830119_extended_partial	1	108130	high-quality	Dianchi	1	dsDNA,Siphoviridae,Sitaravirus	0.9977117570567002,0.9980989821830809,0.9981375460792039	Bacteria,Streptomycetaceae,Streptomyces	0.998165673467777,0.998619677065781,0.9986922945134924
SRR6754101_k141_3596359_extended_circular	SRR6754101_k141_3596359_extended_circular	1	108030	circular	Rimov	1	dsDNA,Siphoviridae,Sitaravirus	0.9946878573190144,0.9953168126583196,0.9943961075815099	Bacteria,Streptomycetaceae,Streptomyces	0.9968554402304748,0.9973702291949548,0.9976578409196878
ERS4600472_contig-140_38_self_circular	ERS4600469_contig-140_35_extended_circular,ERS4600471_contig-140_324_extended_circular,ERS4600472_contig-140_38_self_circular,ERS4600473_contig-140_28_extended_circular	4	107980	circular	Loclat	1	dsDNA,Myoviridae,T4virus	0.9974553281169428,0.9941629610480504,0.9951151911219356	Bacteria,Enterobacteriaceae,Synechococcus	0.9979225699514582,0.9970123676934906,0.9971937464352556
SRR6754102_k141_1288775_extended_partial	SRR6754102_k141_1288775_extended_partial	1	107993	high-quality	Rimov	1	dsDNA,Podoviridae,Cba41virus	0.9981979911665134,0.9986002455875422,0.9988042825419741	Bacteria,Flavobacteriaceae,Cellulophaga	0.9983914124472157,0.9991902105452583,0.999184581653521
ERS4600509_contig-140_149_extended_circular	ERS4600509_contig-140_149_extended_circular,ERS4600510_contig-140_18_extended_circular,ERS4600504_contig-140_124_extended_circular,ERS4600508_contig-140_96_extended_circular,ERS4600507_contig-140_130_extended_partial,ERS4600506_contig-140_1783_extended_partial,ERS4600505_contig-140_2144_extended_circular	7	107942	circular	Mekkojärvi	1	dsDNA,Myoviridae,Cr3virus	0.9951642826715692,0.9964296804682241,0.995261211917501	Bacteria,Bacillaceae,Bacillus	0.996678637673152,0.9976074402473538,0.9979831407919534
SRR9302961_k141_3556406_self_circular	SRR9302961_k141_3556406_self_circular	1	107874	circular	Erhai	1	dsDNA,Siphoviridae,T4virus	0.9903523866107661,0.9916377284255757,0.9916354880125192	Bacteria,Bacillaceae,Bacillus	0.9930099846087059,0.9956770330623129,0.9960768835404771
SRR9302961_k141_2764205_extended_circular	SRR9302961_k141_2764205_extended_circular	1	107696	circular	Erhai	1	dsDNA,Myoviridae,T4virus	0.9865325762841064,0.9868331659828152,0.9837393446145878	Bacteria,Bacillaceae,Bacillus	0.9918876040885591,0.9905933548186563,0.9913665413900714
SRR9302960_k141_16538_self_circular	SRR9302960_k141_16538_self_circular	1	107600	circular	Fuxian	1	dsDNA,Myoviridae,T4virus	0.9916527475730332,0.9924510992328148,0.9897372176701693	Bacteria,Bacillaceae,Bacillus	0.9941797229567071,0.9952782731035386,0.9951638752323183
SRR9302963_k141_852739_self_circular	SRR9302963_k141_852739_self_circular	1	107599	circular	Xingyun	1	dsDNA,Siphoviridae,Sitaravirus	0.9945547384705065,0.9929350233371217,0.9928973280949521	Bacteria,Streptomycetaceae,Streptomyces	0.9960945577962824,0.9965297658972303,0.9967665192696801
SRR6754094_k141_2427913_extended_circular	SRR6754094_k141_2427913_extended_circular	1	107545	circular	Rimov	1	dsDNA,Siphoviridae,Sitaravirus	0.9976627132704078,0.9979823359820428,0.9980383621425934	Bacteria,Streptomycetaceae,Streptomyces	0.9980835865661628,0.9984315441621542,0.9985469939038804
SRR6754093_k141_1033380_extended_partial	SRR6754093_k141_1033380_extended_partial	1	107402	high-quality	Rimov	1	dsDNA,Siphoviridae,Sitaravirus	0.9970671815797144,0.9973202899761506,0.997264176415162	Bacteria,Streptomycetaceae,Streptomyces	0.9978562689924622,0.9983149835588202,0.9984645846029064
SRR9302957_k141_50945_self_circular	SRR9302957_k141_50945_self_circular	1	107123	circular	Lugu	1	dsDNA,Podoviridae,Cba41virus	0.9965627312064211,0.9975031407777779,0.9976774428177054	Bacteria,Flavobacteriaceae,Cellulophaga	0.9976763092466159,0.9985562844569503,0.9986597645262658
SRR9214416_k141_313900_extended_partial	SRR9214416_k141_313900_extended_partial	1	106652	high-quality	Jiricka_pond	1	dsDNA,Podoviridae,Cba41virus	0.9979457659798668,0.9985419224870231,0.9987602007923695	Bacteria,Flavobacteriaceae,Cellulophaga	0.9983045897628162,0.9990225268702865,0.9990457870413543
SRR9302960_k141_1609879_extended_partial	SRR9302960_k141_1609879_extended_partial	1	106549	circular	Fuxian	1	dsDNA,Podoviridae,Cba41virus	0.9984165863282739,0.998702705088454,0.999021936180647	Bacteria,Flavobacteriaceae,Cellulophaga	0.9985966297012511,0.9993210856086508,0.9993298822631329
SRR6754094_k141_1551130_extended_circular	SRR6754094_k141_1551130_extended_circular	1	106524	circular	Rimov	1	dsDNA,Myoviridae,Prtbvirus	0.9901618164697442,0.9922178068307385,0.9920046726654581	Bacteria,Mycobacteriaceae,Mycobacterium	0.994039228067406,0.9960901074811458,0.9962980874536177
ERS4600463_contig-140_62_extended_partial	ERS4600463_contig-140_62_extended_partial	1	106442	high-quality	Loclat	1	dsDNA,Podoviridae,Cba41virus	0.998206398672735,0.9986759079882156,0.9989943850871441	Bacteria,Flavobacteriaceae,Cellulophaga	0.9984592920004736,0.9992658726912821,0.9992778342835704
SRR6754086_k141_3732270_self_circular	SRR6754086_k141_3732270_self_circular,SRR6754088_k141_1687585_extended_partial,SRR6754094_k141_981827_self_circular,SRR6754092_k141_2799307_extended_circular	4	106375	circular	Rimov	1	dsDNA,Myoviridae,T4virus	0.9979135372060175,0.9967906531714368,0.997007951245585	Bacteria,Enterobacteriaceae,Synechococcus	0.998239867398082,0.9978712352970046,0.9980113334475498
ERS4600469_contig-140_383_extended_partial	ERS4600469_contig-140_383_extended_partial,ERS4600473_contig-140_1245_extended_partial	2	106254	high-quality	Loclat	1	dsDNA,Siphoviridae,Lambdavirus	0.9980606685648947,0.9985608380871914,0.9985948942313521	Bacteria,Enterobacteriaceae,Escherichia	0.9984229843324519,0.9989836733358418,0.999017594385758
ERR2814725_NODE_40_length_50763_cov_23.704321_extended_partial	ERR2814725_NODE_40_length_50763_cov_23.704321_extended_partial	1	105829	circular	Soyang	1	dsDNA,Myoviridae,T4virus	0.9934337376409659,0.9940825697473349,0.9930433488905175	Bacteria,Bacillaceae,Bacillus	0.995641501243143,0.9972679830516793,0.9975624196238232
SRR6754103_k141_1231536_extended_partial	SRR6754103_k141_1231536_extended_partial	1	105812	high-quality	Rimov	1	dsDNA,Siphoviridae,Sitaravirus	0.9956841468062686,0.9963366787673964,0.9958838666306665	Bacteria,Streptomycetaceae,Streptomyces	0.9972232526934764,0.9976053953244883,0.9978573581746774
SRR9302965_k141_1413545_extended_partial	SRR9302965_k141_1413545_extended_partial	1	105743	high-quality	Dianchi	1	dsDNA,Siphoviridae,Sitaravirus	0.9974931618949398,0.9979177076814676,0.9979832599555877	Bacteria,Streptomycetaceae,Streptomyces	0.9980014996645488,0.9984274543164232,0.9985469939038804
SRR6754102_k141_1332417_self_circular	SRR6754102_k141_1332417_self_circular	1	105409	circular	Rimov	1	dsDNA,Myoviridae,T4virus	0.9849155325874941,0.9688381250226593,0.9774328993117737	Bacteria,Enterobacteriaceae,Bacillus	0.9909941197363747,0.9836099432329413,0.986120538783335
SRR9302965_k141_1255566_extended_partial	SRR9302965_k141_1255566_extended_partial	1	104836	high-quality	Dianchi	1	dsDNA,Myoviridae,T4virus	0.9965543237001996,0.9976229395788442,0.9968150935910647	Bacteria,Bacillaceae,Bacillus	0.9975800149966455,0.9979284931372389,0.9981024174117841
ERS4600333_contig-140_726_extended_partial	ERS4600333_contig-140_726_extended_partial	1	104820	high-quality	Alinen_Mustajärvi	1	dsDNA,Siphoviridae,T4virus	0.9927807546577585,0.9919987011287884,0.9909053840346923	Bacteria,Bacillaceae,Mycobacterium	0.994520699317258,0.9966115628118507,0.9967665192696801
SRR12053443_k141_745148_extended_partial	SRR12053443_k141_745148_extended_partial	1	104714	high-quality	Baikal	1	dsDNA,Myoviridae,M12virus	0.9982176086810304,0.9977490435799665,0.9978758106909263	Bacteria,Enterobacteriaceae,Synechococcus	0.9984071983898338,0.998503116462447,0.9985947045518127
ERS4600552_contig-140_745_extended_partial	ERS4600552_contig-140_745_extended_partial	1	104557	circular	Mekkojärvi	1	dsDNA,Siphoviridae,Sitaravirus	0.9990667668094074,0.9991598320925225,0.9993277533185292	Bacteria,Streptomycetaceae,Streptomyces	0.9992675322625202,0.999566476352512,0.9995532548420886
ERR2814753_NODE_42_length_92231_cov_218.557609_extended_circular	ERR2814753_NODE_42_length_92231_cov_218.557609_extended_circular	1	104336	circular	Soyang	1	dsDNA,Siphoviridae,Sitaravirus	0.9978266596417281,0.9980674561828003,0.9979529537527344	Bacteria,Streptomycetaceae,Streptomyces	0.998173566439086,0.9985910481456639,0.9986706078553413
SRR6754089_k141_134513_extended_circular	SRR6754089_k141_134513_extended_circular	1	103923	circular	Rimov	1	dsDNA,Myoviridae,T4virus	0.9541426585655673,0.9268801712492335,0.957987337517426	Bacteria,Pseudomonadaceae,Pseudomonas	0.974104739729271,0.9677801953310321,0.9716902364496338
SRR9214415_k141_475049_extended_partial	SRR9214415_k141_475049_extended_partial	1	103826	circular	Jiricka_pond	1	dsDNA,Myoviridae,M12virus	0.9969088402125418,0.9893316015050513,0.9858662890330118	Bacteria,Mycobacteriaceae,Mycobacterium	0.9977205098859465,0.9930145434914195,0.9939342417151544
SRR9214416_k141_678905_extended_circular	SRR9214416_k141_678905_extended_circular	1	103480	circular	Jiricka_pond	1	dsDNA,Myoviridae,T4virus	0.9973474317870995,0.9978956394812712,0.9975176464753887	Bacteria,Bacillaceae,Bacillus	0.9979667705907889,0.998603317682857,0.9986749451869715
SRR6754096_k141_1010919_extended_partial	SRR6754096_k141_1010919_extended_partial,SRR6754101_k141_1477201_extended_partial,SRR6754086_k141_3235900_extended_partial,SRR6754088_k141_2883634_extended_partial	4	103446	high-quality	Rimov	1	dsDNA,Myoviridae,T4virus	0.9971764791605946,0.9977852984802892,0.9975479526782418	Bacteria,Bacillaceae,Bacillus	0.9978136469473934,0.9983599718618613,0.9985057892533934
SRR5338504_k141_3022119_self_circular	SRR5338504_k141_3022119_self_circular	1	103444	circular	Tous	1	dsDNA,Podoviridae,N4virus	0.9988369616393517,0.9987752148890994,0.9985811186846006	Bacteria,Mamiellaceae,Vibrio	0.9990765223568412,0.9989816284129762,0.9990306063806486
SRR8894381_k141_2272613_extended_partial	SRR8894381_k141_2272613_extended_partial,SRR8894378_k141_1622654_extended_partial,SRR8894382_k141_1806730_extended_partial	3	103255	high-quality	Fuxian	1	dsDNA,Myoviridae,M12virus	0.9971778804116315,0.9928767002366027,0.9928697770014492	Bacteria,Enterobacteriaceae,Synechococcus	0.9978594261809859,0.9970225923078182,0.9973780830295393
SRR6754088_k141_1856889_self_circular	SRR6754088_k141_1856889_self_circular,SRR6754092_k141_3100493_self_circular,SRR6754094_k141_796161_self_circular,SRR6754086_k141_706718_self_circular,SRR6754101_k141_2257455_self_circular,SRR6754100_NODE_164_length_103067_cov_35.453458_self_circular	6	102940	circular	Rimov	1	dsDNA,Siphoviridae,Sitaravirus	0.998488050131157,0.9987594518889591,0.9990549974928505	Bacteria,Streptomycetaceae,Streptomyces	0.9987244958364576,0.9992474683854925,0.9992648222886797
SRR6754086_k141_911175_extended_circular	SRR6754086_k141_911175_extended_circular	1	102932	circular	Rimov	1	dsDNA,Siphoviridae,Sitaravirus	0.9979625809923099,0.9983054774849187,0.9983083628589219	Bacteria,Streptomycetaceae,Streptomyces	0.998298275385769,0.9987382825919806,0.9987747038144663
SRR9302961_k141_3397674_extended_partial	SRR9302961_k141_3397674_extended_partial	1	102232	high-quality	Erhai	1	dsDNA,Siphoviridae,Sitaravirus	0.9971330403784499,0.9974779199775535,0.9974515238509817	Bacteria,Streptomycetaceae,Streptomyces	0.9978610047752476,0.9982372764899308,0.9983865126335627
ERS4600511_contig-140_107_extended_circular	ERS4600511_contig-140_107_extended_circular	1	102217	circular	Mekkojärvi	1	dsDNA,Myoviridae,T4virus	0.9965795462188642,0.9974416650772309,0.997198053790755	Bacteria,Bacillaceae,Bacillus	0.9976068510990963,0.998290444484434,0.9984494039422007
SRR6754089_k141_2365641_self_circular	SRR6754089_k141_2365641_self_circular	1	102099	circular	Rimov	1	dsDNA,Siphoviridae,Sitaravirus	0.9979569759881622,0.9982786803846803,0.9981568318446559	Bacteria,Streptomycetaceae,Streptomyces	0.9982951181972454,0.9986503509087638,0.9987139811716433
SRR9302959_k141_1043294_self_circular	SRR9302959_k141_1043294_self_circular	1	102066	circular	Fuxian	1	dsDNA,Myoviridae,T4virus	0.9958354819182567,0.9973565448764733,0.9969914205894832	Bacteria,Bacillaceae,Bacillus	0.9973669047713012,0.9982393214127963,0.9983843439677476
SRR8894380_k141_3982684_extended_partial	SRR8894380_k141_3982684_extended_partial	1	102012	high-quality	Fuxian	1	dsDNA,Myoviridae,T4virus	0.9949092549828487,0.9965211058690379,0.99620070420595	Bacteria,Bacillaceae,Bacillus	0.9969359485378271,0.9976483387046641,0.9978421775139716
ERS4600469_contig-140_198_extended_partial	ERS4600469_contig-140_198_extended_partial,ERS4600473_contig-140_32_extended_partial	2	101987	circular	Loclat	1	dsDNA,Myoviridae,T4virus	0.9962264309575589,0.9966771595704267,0.9962888677051592	Bacteria,Bacillaceae,Bacillus	0.9973779549311338,0.9980389189719764,0.9982000073734638
SRR9214416_k141_464327_extended_partial	SRR9214416_k141_464327_extended_partial	1	101980	high-quality	Jiricka_pond	1	dsDNA,Myoviridae,M12virus	0.9980872923345964,0.9970255218735271,0.9970602983232405	Bacteria,Enterobacteriaceae,Synechococcus	0.9983424760250996,0.9982086475698136,0.9983800066361174
SRR9302965_k141_321130_extended_partial	SRR9302965_k141_321130_extended_partial	1	101715	high-quality	Dianchi	1	dsDNA,Myoviridae,Spo1virus	0.9969901127726835,0.9978609608809625,0.9976691774896546	Bacteria,Bacillaceae,Bacillus	0.997883105094913,0.9985665090712779,0.9986098852125184
SRR9302960_k141_2059769_self_circular	SRR9302960_k141_2059769_self_circular	1	101685	circular	Fuxian	1	dsDNA,Siphoviridae,Sitaravirus	0.9962516534762236,0.9964927324687853,0.9962806023771084	Bacteria,Streptomycetaceae,Streptomyces	0.997493192312246,0.9980021103603972,0.9981241040699351
SRR9302957_k141_1365119_self_circular	SRR9302957_k141_1365119_self_circular	1	101629	circular	Lugu	1	dsDNA,Myoviridae,T4virus	0.9903467816066184,0.9927632066355926,0.9926962051123809	Bacteria,Synechococcaceae,Synechococcus	0.9947306523540786,0.9970185024620871,0.9972089270959613
ERS4600339_contig-140_1637_extended_partial	ERS4600339_contig-140_1637_extended_partial	1	101604	high-quality	Alinen_Mustajärvi	1	dsDNA,Myoviridae,L5virus	0.707658397417214,0.7661748085189558,0.8556129842793461	Bacteria,Bacillaceae,Bacillus	0.7454848257626584,0.9194239043303286,0.9256125938761215
ERR3687827_contig-140_3799_extended_partial	ERR3687827_contig-140_3799_extended_partial	1	101484	high-quality	Lake_Rotsee	1	dsDNA,Myoviridae,Spo1virus	0.9923309530749053,0.9951891323571833,0.9951151911219356	Bacteria,Bacillaceae,Bacillus	0.9956793875054264,0.9973824987321478,0.9976578409196878
SRR6754086_k141_3732433_self_circular	SRR6754086_k141_3732433_self_circular,SRR6754092_k141_3142569_self_circular,SRR6754088_k141_3360402_self_circular	3	101063	circular	Rimov	1	dsDNA,Myoviridae,Bcep22virus	0.9871883617693877,0.9888728982009688,0.9881805808872555	Bacteria,Flavobacteriaceae,Bacillus	0.9932199376455266,0.9935400886678555,0.9937564111183159
ERS4600569_NODE_598_length_39058_cov_12.685110_extended_circular	ERS4600569_NODE_598_length_39058_cov_12.685110_extended_circular	1	101023	circular	Björntjärnan	1	dsDNA,Siphoviridae,Bxz1virus	0.9932207474833531,0.9923880472322536,0.9895305844688975	Bacteria,Pseudomonadaceae,Pseudomonas	0.9960614073167844,0.9970041880020286,0.9973325410474222
ERS4600386_contig-140_25_extended_partial	ERS4600386_contig-140_25_extended_partial,ERS4600385_contig-140_42_extended_partial	2	100861	circular	SAS2	1	dsDNA,Myoviridae,T4virus	0.9967547025984799,0.9976749574793071,0.9973082581647665	Bacteria,Bacillaceae,Bacillus	0.9977489245826592,0.9982883995615686,0.9984233799524195
SRR9214417_k141_645606_extended_circular	SRR9214417_k141_645606_extended_circular	1	100838	circular	Jiricka_pond	1	dsDNA,Siphoviridae,Sitaravirus	0.9992797569670202,0.9993710562944024,0.9995757131600553	Bacteria,Streptomycetaceae,Streptomyces	0.999460120762461,0.9997055311073666,0.9996985554517006
ERS4600504_contig-140_48_self_circular	ERS4600504_contig-140_48_self_circular,ERS4600505_contig-140_56_self_circular	2	100816	circular	Mekkojärvi	1	dsDNA,Myoviridae,T4virus	0.9965697374616057,0.9971689651748038,0.9969500939492288	Bacteria,Bacillaceae,Bacillus	0.997376376336872,0.9980982217350761,0.9982325373606903
ERS4600338_contig-140_147	ERS4600338_contig-140_147,ERS4600329_contig-140_20_extended_partial	2	100796	high-quality	Alinen_Mustajärvi	1	dsDNA,Myoviridae,T4virus	0.9963693585633253,0.997068081973906,0.9969280530744266	Bacteria,Bacillaceae,Bacillus	0.9974174197876791,0.9983068038673582,0.9984710906003518
ERS4600532_contig-140_1263_extended_circular	ERS4600532_contig-140_1263_extended_circular	1	100793	circular	Mekkojärvi	1	dsDNA,Myoviridae,T4virus	0.9968808151918033,0.9973596974765013,0.9971374413850486	Bacteria,Bacillaceae,Bacillus	0.9976384229843325,0.9982066026469482,0.9983756693044872
SRR9214417_k141_1620507_self_circular	SRR9214417_k141_1620507_self_circular	1	100755	circular	Jiricka_pond	1	dsDNA,Myoviridae,Pakpunavirus	0.997110620361859,0.9858984200744959,0.9821303607540183	Bacteria,Enterobacteriaceae,Pseudomonas	0.9976368443900706,0.9883787033553094,0.9862398154031659
ERS4600498_NODE_23_length_100795_cov_8.441411_self_circular	ERS4600498_NODE_23_length_100795_cov_8.441411_self_circular,ERS4600499_contig-140_10_self_circular	2	100668	circular	Loclat	1	dsDNA,Siphoviridae,Chlorovirus	0.964701085128803,0.947621126833828,0.9668780753908123	Bacteria,Bacillaceae,Bacillus	0.9789841745925254,0.9821232843097158,0.98465668935814
SRR6754089_k141_1185987_self_circular	SRR6754089_k141_1185987_self_circular	1	100653	circular	Rimov	1	dsDNA,Myoviridae,P12024virus	0.9892566082998901,0.9774053155989073,0.9777056551374524	Bacteria,Bacillaceae,Bacillus	0.993840325190418,0.9789393394081175,0.9799224918837682
DRR125123_contig-140_17_extended_partial	DRR125123_contig-140_17_extended_partial,DRR125122_contig-140_8_extended_partial	2	100632	high-quality	Biwa	1	dsDNA,Myoviridae,T4virus	0.996185794677488,0.9968316369718015,0.9964045822978714	Bacteria,Bacillaceae,Bacillus	0.9974726705868424,0.9980286943576488,0.9981696460520523
ERR2814752_NODE_18_length_99344_cov_6.559229_extended_circular	ERR2814752_NODE_18_length_99344_cov_6.559229_extended_circular	1	100619	circular	Soyang	1	dsDNA,Siphoviridae,Sitaravirus	0.9986856265273636,0.9989722523908531,0.9992340796006194	Bacteria,Streptomycetaceae,Streptomyces	0.9989675993527763,0.9994887692836226,0.9994600022120391
ERS4600401_contig-140_30_extended_partial	ERS4600401_contig-140_30_extended_partial	1	100478	high-quality	SAS2	1	dsDNA,Myoviridae,T4virus	0.9968738089366186,0.9974243257770765,0.9971732578066024	Bacteria,Bacillaceae,Bacillus	0.9977852322506807,0.9982965792530306,0.9984233799524195
SRR9214418_k141_335666_extended_circular	SRR9214418_k141_335666_extended_circular	1	100424	circular	Jiricka_pond	1	dsDNA,Siphoviridae,Sitaravirus	0.9987206578032868,0.9989296922904742,0.9992010182884159	Bacteria,Streptomycetaceae,Streptomyces	0.9989881210781799,0.999462185286371,0.9994274722248125
SRR6754086_k141_2968263_extended_partial	SRR6754086_k141_2968263_extended_partial,SRR6754100_NODE_193_length_95992_cov_5.412528_extended_partial	2	100201	high-quality	Rimov	1	dsDNA,Siphoviridae,Sitaravirus	0.995148868910163,0.995877975463314,0.9957874378034064	Bacteria,Streptomycetaceae,Streptomyces	0.9968996408698054,0.9975092839498094,0.997744587552292
SRR6754098_k141_1853169_self_circular	SRR6754092_k141_2325999_extended_partial,SRR6754098_k141_1853169_self_circular,SRR6754086_k141_1956999_extended_circular	3	99910	circular	Rimov	1	dsDNA,Myoviridae,T4virus	0.9964548348765778,0.9972272882753229,0.9969528490585792	Bacteria,Bacillaceae,Bacillus	0.9975373929515766,0.9981841084954276,0.9983518139805211
ERS4600402_contig-140_5_self_circular	ERS4600401_contig-140_7_extended_circular,ERS4600402_contig-140_5_self_circular,ERS4600313_contig-140_28	3	99980	circular	SAS2	1	dsDNA,Myoviridae,T4virus	0.9970391565589759,0.9974353598771747,0.9972200946655573	Bacteria,Bacillaceae,Bacillus	0.9975879079679545,0.9982393214127963,0.9983865126335627
SRR6754086_k141_1849765_extended_partial	SRR6754086_k141_1849765_extended_partial	1	99979	high-quality	Rimov	1	dsDNA,Myoviridae,Spo1virus	0.9576906261910634,0.9672050782081252,0.9663821557077601	Bacteria,Bacillaceae,Bacillus	0.9755870397411105,0.9737370556382613,0.9769015404033284
SRR9214416_k141_304144_extended_partial	SRR9214416_k141_304144_extended_partial	1	99934	circular	Jiricka_pond	1	dsDNA,Myoviridae,T4virus	0.9968191601461786,0.9974558517773571,0.99734131947697	Bacteria,Bacillaceae,Bacillus	0.9977015667548048,0.9982393214127963,0.9983886812993779
SRR6754102_k141_1822843_extended_circular	SRR6754102_k141_1822843_extended_circular,SRR6754094_k141_206579_extended_partial,SRR6754086_k141_322478_extended_partial,SRR6754092_k141_3093912_extended_partial,SRR6754088_k141_1414486_extended_partial	5	99800	circular	Rimov	1	dsDNA,Siphoviridae,Sitaravirus	0.988711521646526,0.9890746646027645,0.9898639527002827	Bacteria,Streptomycetaceae,Streptomyces	0.9937045660839022,0.9956729432165818,0.9960313415583599
SRR8894379_k141_2046258_extended_circular	SRR8894379_k141_2046258_extended_circular	1	99800	circular	Fuxian	1	dsDNA,Myoviridae,T4virus	0.9871911642714616,0.9916787122259405,0.9903543621646343	Bacteria,Bacillaceae,Bacillus	0.9927005801333912,0.9950574214340635,0.9950185746227064
SRR9214418_k141_1193199_extended_partial	SRR9214418_k141_1193199_extended_partial	1	99707	high-quality	Jiricka_pond	1	dsDNA,Myoviridae,T4virus	0.9974665381252382,0.9977506198799805,0.9975341771314904	Bacteria,Bacillaceae,Bacillus	0.9979099411973638,0.9984499484679438,0.9985621745645861
SRR9214414_k141_802936_extended_partial	SRR9214414_k141_802936_extended_partial	1	99572	high-quality	Jiricka_pond	1	dsDNA,Myoviridae,M12virus	0.9980298410420824,0.9965652422694307,0.9964734600316286	Bacteria,Enterobacteriaceae,Synechococcus	0.9982951181972454,0.9981391201923864,0.9982498866872112
ERS4600336_contig-140_891_extended_partial	ERS4600336_contig-140_891_extended_partial	1	99368	circular	Alinen_Mustajärvi	1	dsDNA,Myoviridae,Muvirus	0.98718275676524,0.96356067257569,0.9767799383957549	Bacteria,Flavobacteriaceae,Pseudomonas	0.9933114961127116,0.8906109411552996,0.9066194186674416
SRR9214416_k141_513882_extended_circular	SRR9214416_k141_513882_extended_circular	1	99169	circular	Jiricka_pond	1	dsDNA,Myoviridae,T4virus	0.9958466919265521,0.9969687750730221,0.9969335632931271	Bacteria,Bacillaceae,Bacillus	0.9974537274557007,0.9981616143439069,0.9982954286693283
SRR9302961_k141_3556288_self_circular	SRR9302961_k141_3556288_self_circular	1	99169	circular	Erhai	1	dsDNA,Myoviridae,T4virus	0.9970405578100128,0.9972997980759682,0.9971374413850486	Bacteria,Bacillaceae,Bacillus	0.9976084296933581,0.9982045577240827,0.9983691633070418
ERS4600334_contig-140_886_extended_circular	ERS4600334_contig-140_886_extended_circular	1	98995	circular	Alinen_Mustajärvi	1	dsDNA,Siphoviridae,T4virus	0.9831205300091922,0.9900992596118834,0.9882108870901086	Bacteria,Pseudomonadaceae,Pseudomonas	0.9898417459252535,0.9948917826819572,0.9951270079134615
ERS4600481_contig-140_1750_extended_partial	ERS4600481_contig-140_1750_extended_partial	1	98990	circular	Loclat	1	dsDNA,Siphoviridae,T4virus	0.9821550680447504,0.9719923013507314,0.9696745113813567	Bacteria,Mycobacteriaceae,Mycobacterium	0.9893839535893287,0.9789618335596382,0.9798856245649115
SRR5338504_k141_484599_self_circular	SRR4198666_contig-140_189_extended_circular,SRR4198832_contig-140_2252_extended_circular,SRR5338504_k141_484599_self_circular	3	98930	circular	Tous	1	dsDNA,Myoviridae,T4virus	0.9958733156962536,0.9970270981735412,0.9965313173279847	Bacteria,Bacillaceae,Bacillus	0.9973337542918032,0.9979796162088767,0.9981241040699351
ERS4600469_contig-140_38_extended_partial	ERS4600469_contig-140_38_extended_partial	1	98911	high-quality	Loclat	1	dsDNA,Myoviridae,M12virus	0.9974188955899828,0.9933023012403904,0.993076410202721	Bacteria,Enterobacteriaceae,Pseudomonas	0.9979367772998146,0.9967138089551262,0.9968727838946202
ERS4600401_contig-140_759_extended_circular	ERS4600401_contig-140_759_extended_circular	1	98851	circular	SAS2	1	dsDNA,Myoviridae,T4virus	0.9969803040154249,0.9977994851804154,0.9973468296956706	Bacteria,Bacillaceae,Bacillus	0.9977015667548048,0.9983967804734405,0.9985253072457294
SRR8894379_k141_479563_extended_circular	SRR8894379_k141_479563_extended_circular,SRR8894381_k141_846240_extended_partial	2	98750	circular	Fuxian	1	dsDNA,Siphoviridae,Sitaravirus	0.9975996569737462,0.997616634378788,0.9975231566940892	Bacteria,Streptomycetaceae,Streptomyces	0.9979683491850507,0.9983477023246683,0.9984949459243179
SRR6754100_NODE_502_length_59776_cov_21.181210_extended_circular	SRR6754100_NODE_502_length_59776_cov_21.181210_extended_circular,SRR6754102_k141_2707776_extended_partial	2	98641	circular	Rimov	1	dsDNA,Myoviridae,T4virus	0.9963077035177006,0.9973565448764733,0.997112645400896	Bacteria,Bacillaceae,Bacillus	0.9973732191483484,0.9981881983411586,0.9983518139805211
ERS4600319_contig-140_783_extended_partial	ERS4600319_contig-140_783_extended_partial	1	98632	high-quality	Alinen_Mustajärvi	1	dsDNA,Myoviridae,T4virus	0.9971694729054099,0.9977884510803172,0.9976801979270558	Bacteria,Bacillaceae,Bacillus	0.9978310114842732,0.9985746887627399,0.9986510898630053
ERS4600455_contig-140_19_self_circular	ERS4600455_contig-140_19_self_circular	1	98567	circular	Lovojärvi	1	dsDNA,Siphoviridae,T4virus	0.9875709033024684,0.9894009587056686,0.9881612951218034	Bacteria,Bacillaceae,Bacillus	0.9932294092110975,0.9960962422497424,0.9964238700708937
SRR6754102_k141_86446_extended_partial	SRR6754102_k141_86446_extended_partial	1	98543	high-quality	Rimov	1	dsDNA,Siphoviridae,Sitaravirus	0.9922006367284711,0.9919183098280729,0.9917897741361354	Bacteria,Streptomycetaceae,Streptomyces	0.994719602194246,0.9964847775941892,0.9968315792441332
ERS4600329_contig-140_21_self_circular	ERS4600330_contig-140_18_extended_circular,ERS4600329_contig-140_21_self_circular,ERS4600340_contig-140_71_self_circular,ERS4600339_contig-140_155_extended_circular,ERS4600338_contig-140_154_self_circular,ERS4600328_contig-140_11_self_circular,ERS4600331_contig-140_20_extended_circular,ERS4600341_contig-140_58_self_circular	8	98534	circular	Alinen_Mustajärvi	1	dsDNA,Siphoviridae,P12024virus	0.9311719503172432,0.944093367402431,0.9659220524462616	Bacteria,Enterobacteriaceae,Bacillus	0.9567828248944316,0.9706062787311662,0.972091439625428
SRR12053441_k141_1947151_extended_partial	SRR12053441_k141_1947151_extended_partial,SRR8561390_k141_210124_extended_partial	2	98462	high-quality	Baikal	1	dsDNA,Siphoviridae,Sitaravirus	0.987427975696702,0.9820144168399283,0.984444652608262	Bacteria,Streptomycetaceae,Streptomyces	0.9928694897194049,0.9944275851914866,0.9946238774443574
ERS4600492_contig-140_65_extended_partial	ERS4600492_contig-140_65_extended_partial	1	98227	high-quality	Loclat	1	dsDNA,Siphoviridae,Sitaravirus	0.997375456807838,0.9975267852779884,0.9971815231346532	Bacteria,Streptomycetaceae,Streptomyces	0.9978799479063893,0.9983272530960132,0.9984537412738309
ERR2814753_NODE_38_length_97307_cov_19.043970_extended_partial	ERR2814753_NODE_38_length_97307_cov_19.043970_extended_partial	1	98021	high-quality	Soyang	1	dsDNA,Podoviridae,Cba41virus	0.9945000896800663,0.9967181433707915,0.9967517260760079	Bacteria,Flavobacteriaceae,Cellulophaga	0.996306089427365,0.9979734814402801,0.9981371160648258
SRR6754100_NODE_190_length_97092_cov_12.975940_self_circular	SRR6754096_k141_1667335_extended_partial,SRR6754100_NODE_190_length_97092_cov_12.975940_self_circular,SRR6754094_k141_1728840_extended_circular,SRR6754098_k141_114157_self_circular	4	96965	circular	Rimov	1	dsDNA,Myoviridae,T4virus	0.9960961146111248,0.9973596974765013,0.997236625321659	Bacteria,Bacillaceae,Bacillus	0.997360590394254,0.9981881983411586,0.9983496453147059
ERS4600569_NODE_1248_length_22858_cov_8.572302_extended_partial	ERS4600569_NODE_1248_length_22858_cov_8.572302_extended_partial	1	97950	high-quality	Björntjärnan	1	dsDNA,Myoviridae,T4virus	0.9891431069658991,0.9910797182206095,0.991310385109185	Bacteria,Bacillaceae,Bacillus	0.9938687398871305,0.9967178988008573,0.9969768798537452
SRR9302958_k141_785905_extended_circular	SRR9302958_k141_785905_extended_circular	1	97756	circular	Lugu	1	dsDNA,Myoviridae,T4virus	0.9970041252830527,0.9976844152793913,0.9975617282249932	Bacteria,Bacillaceae,Bacillus	0.997883105094913,0.9983783761676509,0.9985122952508387
SRR9214416_k141_865804_extended_circular	SRR9214416_k141_865804_extended_circular	1	97743	circular	Jiricka_pond	1	dsDNA,Myoviridae,T4virus	0.9965234961773872,0.9966550913702303,0.9961703980030967	Bacteria,Bacillaceae,Bacillus	0.9976289514187616,0.9980143798975902,0.998184826712758
SRR9302959_k141_4771610_self_circular	SRR9302959_k141_4771610_self_circular	1	97701	circular	Fuxian	1	dsDNA,Myoviridae,T4virus	0.9909913570836042,0.9907613056177756,0.9913269157652868	Bacteria,Bacillaceae,Bacillus	0.9942144520304669,0.9949858491337706,0.9953200191710058
SRR9214414_k141_357635_self_circular	SRR9214414_k141_357635_self_circular,SRR9214416_k141_1064214_self_circular	2	97403	circular	Jiricka_pond	1	dsDNA,Siphoviridae,T4virus	0.9968443826648432,0.9974416650772309,0.9965313173279847	Bacteria,Enterobacteriaceae,Bacillus	0.9977362958285647,0.9979141786771802,0.9980677187587425
SRR9214416_k141_827364_extended_circular	SRR9214416_k141_827364_extended_circular	1	97389	circular	Jiricka_pond	1	dsDNA,Myoviridae,T4virus	0.9958410869224044,0.9969325201726994,0.9967627465134091	Bacteria,Bacillaceae,Bacillus	0.9973700619598248,0.9980593682006315,0.9982000073734638
SRR9214415_k141_1345934_self_circular	SRR9214415_k141_1345934_self_circular	1	97157	circular	Jiricka_pond	1	dsDNA,Myoviridae,T4virus	0.9929545097863373,0.995662022361392,0.9952860079016537	Bacteria,Bacillaceae,Bacillus	0.9959193338332215,0.9973927233464753,0.9976556722538727
ERS4600333_contig-140_94_self_circular	ERS4600333_contig-140_94_self_circular	1	97115	circular	Alinen_Mustajärvi	1	dsDNA,Podoviridae,Cba41virus	0.9967897338744031,0.9975661927783391,0.9976581570522534	Bacteria,Flavobacteriaceae,Cellulophaga	0.9976384229843325,0.9983477023246683,0.9985036205875784
ERS4600511_contig-140_399_extended_partial	ERS4600511_contig-140_399_extended_partial	1	97089	high-quality	Mekkojärvi	1	dsDNA,Siphoviridae,Phic31virus	0.9974427168576104,0.9982786803846803,0.9982973424215207	Bacteria,Mycobacteriaceae,Mycobacterium	0.9981120012628754,0.9986319466029742,0.998705306508383
ERS4600313_contig-140_30_self_circular	ERS4600313_contig-140_30_self_circular	1	96980	circular	SAS2	1	dsDNA,Myoviridae,T4virus	0.9780101674775239,0.9838003647558232,0.9851912872421906	Bacteria,Bacillaceae,Bacillus	0.9865472197008563,0.9919634531385476,0.9920019604738969
ERR3687821_contig-140_215_extended_partial	ERR3687821_contig-140_215_extended_partial	1	96942	circular	Lake_Rotsee	1	dsDNA,Myoviridae,T4virus	0.9972703629800687,0.9978515030808783,0.9974680545070834	Bacteria,Bacillaceae,Bacillus	0.9979367772998146,0.9985808235313364,0.9986619331920809
SRR6754089_k141_23550_self_circular	SRR6754089_k141_23550_self_circular	1	96816	circular	Rimov	1	dsDNA,Myoviridae,T4virus	0.9972535479676254,0.9968852311722786,0.9968812162154715	Bacteria,Bacillaceae,Bacillus	0.9976100082876199,0.9979796162088767,0.9981566340571617
SRR6754088_k141_2601212_self_circular	SRR6754092_k141_1997550_extended_partial,SRR6754096_k141_166706_extended_partial,SRR6754094_k141_4150330_extended_circular,SRR6754098_k141_2277328_extended_partial,SRR6754088_k141_2601212_self_circular,SRR6754086_k141_3315510_self_circular	6	96706	circular	Rimov	1	dsDNA,Myoviridae,T4virus	0.992223056745062,0.9940132125467176,0.994853455733658	Bacteria,Bacillaceae,Bacillus	0.9956036149808596,0.9971780064455968,0.9975060343126305
SRR8894379_k141_24518_extended_circular	SRR8894379_k141_24518_extended_circular,SRR8894382_k141_493595_extended_partial	2	96777	circular	Fuxian	1	dsDNA,Myoviridae,T4virus	0.9912253660067708,0.988557638198163,0.987825171781068	Bacteria,Pseudomonadaceae,Pseudomonas	0.9952294881408106,0.9942578565936493,0.9940274943452039
ERS4600489_contig-140_136_extended_partial	ERS4600489_contig-140_136_extended_partial,ERS4600490_contig-140_195_extended_partial	2	96736	circular	Loclat	1	dsDNA,Myoviridae,T4virus	0.8887841064502388,0.8544775590048502,0.9328028829464241	Bacteria,Synechococcaceae,Synechococcus	0.9140834287067366,0.9319838205702881,0.9397414516615233
ERS4600513_contig-140_1123_extended_circular	ERS4600513_contig-140_1123_extended_circular,ERS4600526_contig-140_36_extended_partial,ERS4600525_contig-140_35_extended_partial	3	96698	circular	Mekkojärvi	1	dsDNA,Podoviridae,N4virus	0.9950017375512857,0.9963445602674665,0.9920652850711644	Bacteria,Vibrionaceae,Vibrio	0.996820711156715,0.9960512539467011,0.9960573655481412
SRR9302960_k141_1720267_self_circular	SRR9302960_k141_1720267_self_circular	1	96607	circular	Fuxian	1	dsDNA,Myoviridae,M12virus	0.9974735443804228,0.9926843916348911,0.9925942660664202	Bacteria,Enterobacteriaceae,Synechococcus	0.9979478274596472,0.9964990920542477,0.9968554345680993
SRR9214416_k141_627649_self_circular	SRR9214416_k141_627649_self_circular	1	96573	circular	Jiricka_pond	1	dsDNA,Myoviridae,T4virus	0.9913584848552788,0.994304828049313,0.9947294758128951	Bacteria,Bacillaceae,Bacillus	0.9948837759974742,0.9972843424346034,0.9975819376161592
SRR9214416_k141_819075_self_circular	SRR9214418_k141_1036708_extended_partial,SRR9214416_k141_819075_self_circular	2	55376	circular	Jiricka_pond	1	dsDNA,Myoviridae,Lambdavirus	0.997961179741273,0.9985135490867706,0.9985948942313521	Bacteria,Enterobacteriaceae,Escherichia	0.9983472118078851,0.9989857182587073,0.999017594385758
SRR9214418_k141_221760_extended_circular	SRR9214418_k141_221760_extended_circular,SRR9214416_k141_201085_extended_circular	2	96537	circular	Jiricka_pond	1	dsDNA,Myoviridae,T4virus	0.9982554424590274,0.9985592617871775,0.998366220155278	Bacteria,Bacillaceae,Bacillus	0.9984845495086625,0.9989918530273038,0.9990241003832032
SRR6754087_k141_1386378_extended_partial	SRR6754087_k141_1386378_extended_partial	1	96489	high-quality	Rimov	1	dsDNA,Myoviridae,T4virus	0.994884032464184,0.9967985346715069,0.9968894815435224	Bacteria,Bacillaceae,Bacillus	0.9969706776115869,0.9977873934595187,0.9979961527868441
ERS4600386_contig-140_883_extended_partial	ERS4600386_contig-140_883_extended_partial	1	96398	circular	SAS2	1	dsDNA,Myoviridae,T4virus	0.9966874425487074,0.9976623470791949,0.9971401964943989	Bacteria,Bacillaceae,Bacillus	0.9975484431114093,0.9983374777103408,0.9984949459243179
SRR6754098_k141_1205952_self_circular	SRR6754096_k141_351146_extended_circular,SRR6754098_k141_1205952_self_circular	2	96377	circular	Rimov	1	dsDNA,Myoviridae,T4virus	0.9858781920498622,0.9891660900035782,0.9893790534546316	Bacteria,Bacillaceae,Bacillus	0.9919539050475552,0.9951433081944149,0.9954674884464328
SRR9214414_k141_1714986_extended_circular	SRR9214414_k141_1714986_extended_circular	1	96286	circular	Jiricka_pond	1	dsDNA,Siphoviridae,Sitaravirus	0.9985286864112279,0.9987641807890012,0.9990109157432459	Bacteria,Streptomycetaceae,Streptomyces	0.998762382098741,0.9993108609943233,0.9993298822631329
ERS4600325_contig-140_124_self_circular	ERS4600325_contig-140_124_self_circular,ERS4600324_contig-140_77_extended_circular	2	96169	circular	Alinen_Mustajärvi	1	dsDNA,Siphoviridae,T4virus	0.9661822074748335,0.9786679319101446,0.9750607501611739	Bacteria,Rhodobacteraceae,Rhodobacter	0.9799565886578002,0.9887938226970079,0.9894451034778894
ERS4600549_contig-140_52_extended_circular	ERS4600549_contig-140_52_extended_circular	1	96107	circular	Mekkojärvi	1	dsDNA,Myoviridae,T4virus	0.9971092191108222,0.99783258748071,0.9972669315245122	Bacteria,Bacillaceae,Bacillus	0.997783653656419,0.9982556807957204,0.9984060306258986
SRR6754096_k141_699898_extended_circular	SRR6754096_k141_699898_extended_circular	1	96097	circular	Rimov	1	dsDNA,Siphoviridae,T4virus	0.9939858305495146,0.9940447385469982,0.9918917131820962	Bacteria,Enterobacteriaceae,Escherichia	0.9963392399068629,0.9967260784923193,0.9971156744659119
ERS4600401_contig-140_10_self_circular	ERS4600401_contig-140_10_self_circular	1	96067	circular	SAS2	1	dsDNA,Myoviridae,T4virus	0.9951656839226061,0.9965132243689677,0.9960849896132378	Bacteria,Bacillaceae,Bacillus	0.9967591459805044,0.9978835048341976,0.9980742247561878
ERR3687823_contig-140_363_extended_partial	ERR3687823_contig-140_363_extended_partial	1	96031	high-quality	Lake_Rotsee	1	dsDNA,Podoviridae,Cba41virus	0.9926854695872475,0.9964690879685749,0.9968150935910647	Bacteria,Flavobacteriaceae,Cellulophaga	0.9959445913414104,0.9979100888314493,0.998100248745969
ERS4600453_contig-140_270_extended_partial	ERS4600453_contig-140_270_extended_partial	1	96004	high-quality	Lovojärvi	1	dsDNA,Myoviridae,T4virus	0.9671070331592045,0.9712687796442921,0.9804910706905957	Bacteria,Bacillaceae,Bacillus	0.9818224870752594,0.9875382400575851,0.9884735411927228
ERS4600481_contig-140_24_self_circular	ERS4600481_contig-140_24_self_circular,ERS4600483_contig-140_32_self_circular,ERS4600482_contig-140_20_self_circular	3	95999	circular	Loclat	1	dsDNA,Myoviridae,T4virus	0.9942969082797122,0.994470339550786,0.9949967214198732	Bacteria,Bacillaceae,Bacillus	0.996762303169028,0.9974336218037856,0.9977337442232165
ERS4600401_contig-140_11_self_circular	ERS4600401_contig-140_11_self_circular	1	95877	circular	SAS2	1	dsDNA,Myoviridae,T4virus	0.9950942201197229,0.9967670086712264,0.9961152958160909	Bacteria,Bacillaceae,Bacillus	0.9965570859149927,0.9976790125476467,0.9979072374884247
SRR9302965_k141_1664317_extended_partial	SRR9302965_k141_1664317_extended_partial	1	95853	circular	Dianchi	1	dsDNA,Myoviridae,T4virus	0.9971820841647423,0.9979791833820147,0.9977435654421124	Bacteria,Bacillaceae,Bacillus	0.9978957338490074,0.9985051613853125,0.9985925358859976
SRR6754103_k141_1082236_self_circular	SRR6754103_k141_1082236_self_circular	1	95782	circular	Rimov	1	dsDNA,Myoviridae,T4virus	0.9940208618254377,0.9960072320644644,0.9959858056766273	Bacteria,Bacillaceae,Bacillus	0.9965681360748254,0.9976810574705122,0.9979224181491305
SRR6754087_k141_2488645_extended_circular	SRR6754089_k141_302706_extended_partial,SRR6754087_k141_2488645_extended_circular,SRR6754088_k141_144718_extended_partial,SRR6754086_k141_871598_extended_partial	4	94857	circular	Rimov	1	dsDNA,Myoviridae,T4virus	0.9949835212878058,0.995662022361392,0.9952474363707495	Bacteria,Bacillaceae,Bacillus	0.996413433837168,0.9975583620985816,0.997766274210443
SRR8894379_k141_2248634_extended_partial	SRR8894379_k141_2248634_extended_partial	1	95679	high-quality	Fuxian	1	dsDNA,Myoviridae,Lambdavirus	0.9707558908593592,0.9607863845509989,0.9690270606840385	Bacteria,Pseudomonadaceae,Pseudomonas	0.9832305931567938,0.9791458766175339,0.981462244612492
SRR9302961_k141_1623693_extended_partial	SRR9302961_k141_1623693_extended_partial	1	95628	high-quality	Erhai	1	dsDNA,Myoviridae,T4virus	0.9957682218684842,0.99707753977399,0.9969721348240311	Bacteria,Bacillaceae,Bacillus	0.9973495402344212,0.9979019091399872,0.9980959114143387
SRR6754087_k141_1082176_extended_circular	SRR6754087_k141_1082176_extended_circular	1	95584	circular	Rimov	1	dsDNA,Myoviridae,T4virus	0.9971554603950407,0.9976229395788442,0.996809583372364	Bacteria,Bacillaceae,Bacillus	0.9979478274596472,0.9983211183274167,0.9984667532687216
ERS4600481_contig-140_56_extended_partial	ERS4600481_contig-140_56_extended_partial	1	95528	circular	Loclat	1	dsDNA,Myoviridae,T4virus	0.9707404770979531,0.9804696428261798,0.984530060998121	Bacteria,Synechococcaceae,Synechococcus	0.982839101779865,0.9900453154906997,0.9912385901069802
SRR8894380_k141_5436786_extended_circular	SRR8894380_k141_5436786_extended_circular	1	95387	circular	Fuxian	1	dsDNA,Myoviridae,T4virus	0.9961745846691926,0.9971437443745793,0.9968509100126184	Bacteria,Bacillaceae,Bacillus	0.9974032124393227,0.9979918857460697,0.9981371160648258
SRR6754099_k141_624150_extended_partial	SRR6754099_k141_624150_extended_partial	1	95367	high-quality	Rimov	1	dsDNA,Myoviridae,T4virus	0.9968752101876556,0.997559887578283,0.9975699935530441	Bacteria,Bacillaceae,Bacillus	0.9977315600457792,0.9984479035450783,0.9985795238911069
SRR6754102_k141_1115761_self_circular	SRR6754102_k141_1115761_self_circular	1	95270	circular	Rimov	1	dsDNA,Podoviridae,Cba41virus	0.9964240073537655,0.9975961424786056,0.9975424424595413	Bacteria,Flavobacteriaceae,Cellulophaga	0.9975973795335253,0.9984090500106336,0.9984949459243179
ERS4600505_contig-140_70_self_circular	ERS4600504_contig-140_301_extended_circular,ERS4600505_contig-140_70_self_circular	2	95260	circular	Mekkojärvi	1	dsDNA,Myoviridae,T4virus	0.997509976907383,0.9981825260838245,0.9977242796766603	Bacteria,Bacillaceae,Bacillus	0.9981056868858281,0.9983681515533234,0.9984949459243179
ERS4600507_contig-140_2080_extended_partial	ERS4600507_contig-140_2080_extended_partial,ERS4600506_contig-140_1357_extended_partial	2	95218	high-quality	Mekkojärvi	1	dsDNA,Myoviridae,T4virus	0.9961956034347466,0.9968284843717735,0.996704889217053	Bacteria,Bacillaceae,Bacillus	0.9973463830458976,0.9980593682006315,0.998247718021396
ERS4600401_contig-140_16_extended_circular	ERS4600401_contig-140_16_extended_circular	1	95176	circular	SAS2	1	dsDNA,Myoviridae,T4virus	0.9961998071878573,0.9971705414748179,0.996561623530838	Bacteria,Bacillaceae,Bacillus	0.9973590117999921,0.9979428075972975,0.9981024174117841
SRR9214418_k141_714988_extended_circular	SRR9214418_k141_714988_extended_circular	1	95122	circular	Jiricka_pond	1	dsDNA,Myoviridae,T4virus	0.9946093872609466,0.9957960078625845,0.9948892721552118	Bacteria,Bacillaceae,Bacillus	0.9963597616322665,0.9975706316357748,0.9978421775139716
SRR9214416_k141_1034468_self_circular	SRR9214416_k141_1034468_self_circular,SRR9214418_k141_413637_self_circular	2	94820	circular	Jiricka_pond	1	dsDNA,Siphoviridae,Sitaravirus	0.9956981593166379,0.9965431740692342,0.9962806023771084	Bacteria,Streptomycetaceae,Streptomyces	0.9971316942262914,0.9975644968671782,0.9978009728634847
SRR6754103_k141_1602547_extended_partial	SRR6754103_k141_1602547_extended_partial	1	94693	high-quality	Rimov	1	dsDNA,Myoviridae,T4virus	0.9420092258368271,0.9403070947687332,0.9289099134344642	Bacteria,Pseudomonadaceae,Pseudomonas	0.9558451399029164,0.9582713040064129,0.9622109981718148
ERS4600313_contig-140_97_extended_partial	ERS4600313_contig-140_97_extended_partial	1	94588	high-quality	SAS2	1	dsDNA,Myoviridae,T4virus	0.9953324327960003,0.9966818884704688,0.996514786671883	Bacteria,Bacillaceae,Bacillus	0.9969706776115869,0.9977710340765946,0.9979853094577685
ERS4600495_contig-140_71	ERS4600495_contig-140_71,ERS4600500_contig-140_36,ERS4600465_contig-140_266	3	94444	high-quality	Loclat	1	dsDNA,Siphoviridae,T4virus	0.9302611371432414,0.893014941747833,0.9063593434023396	Bacteria,Synechococcaceae,Synechococcus	0.935882236868069,0.9384825854368773,0.9458267279387048
ERS4600539_contig-140_41_self_circular	ERS4600539_contig-140_41_self_circular	1	94426	circular	Mekkojärvi	1	dsDNA,Siphoviridae,Lambdavirus	0.9883570051341838,0.9905784548161483,0.9921727343358258	Bacteria,Enterobacteriaceae,Escherichia	0.9936556296617862,0.9963620822222585,0.995803631647774
SRR6754102_k141_2604002_extended_partial	SRR6754102_k141_2604002_extended_partial	1	94385	high-quality	Rimov	1	dsDNA,Myoviridae,T4virus	0.9897512499159249,0.9897824233090635,0.9905361993817534	Bacteria,Bacillaceae,Bacillus	0.9938687398871305,0.9956238650678096,0.9958166436426646
SRR9214416_k141_625974_extended_partial	SRR9214416_k141_625974_extended_partial	1	94209	circular	Jiricka_pond	1	dsDNA,Myoviridae,T4virus	0.9931899199605407,0.996478545768659,0.9961263162534921	Bacteria,Bacillaceae,Bacillus	0.9961971664233,0.9975644968671782,0.9978183221900054
ERR2814753_NODE_41_length_94313_cov_14.853609_self_circular	ERR2814753_NODE_41_length_94313_cov_14.853609_self_circular,ERR2814725_NODE_9_length_93037_cov_14.754235_self_circular	2	94186	circular	Soyang	1	dsDNA,Myoviridae,T4virus	0.9953338340470372,0.9966976514706091,0.99677101184146	Bacteria,Bacillaceae,Bacillus	0.9971680018943131,0.9978794149884667,0.9980135021133648
ERR3687829_contig-140_347_extended_partial	ERR3687829_contig-140_347_extended_partial,ERR3687828_contig-140_38_extended_partial	2	94010	high-quality	Lake_Rotsee	1	dsDNA,Myoviridae,T4virus	0.9949386812546241,0.9967906531714368,0.9961951939872493	Bacteria,Bacillaceae,Bacillus	0.9970401357591065,0.9978835048341976,0.998078562087818
SRR6754086_k141_3051884_extended_circular	SRR6754086_k141_3051884_extended_circular,SRR6754094_k141_4558798_extended_partial	2	93857	circular	Rimov	1	dsDNA,Myoviridae,T4virus	0.9950886151155752,0.9966598202702724,0.9967407056386068	Bacteria,Bacillaceae,Bacillus	0.9970496073246774,0.9980675478920935,0.9981978387076487
SRR4198832_contig-140_5008_extended_partial	SRR4198832_contig-140_5008_extended_partial	1	93839	circular	Tous	1	dsDNA,Myoviridae,T4virus	0.9939760217922561,0.9955359183602697,0.995308048776456	Bacteria,Bacillaceae,Bacillus	0.9964860491732113,0.9973477350434342,0.9975754316187139
SRR6754086_k141_3732415_self_circular	SRR6754086_k141_3732415_self_circular,SRR6754088_k141_1403888_self_circular	2	93766	circular	Rimov	1	dsDNA,Podoviridae,Cba41virus	0.9931534874335807,0.9963492891675086,0.9966718279048495	Bacteria,Flavobacteriaceae,Cellulophaga	0.9958672402225818,0.9980982217350761,0.9982542240188413
SRR9302963_k141_293893_extended_partial	SRR9302963_k141_293893_extended_partial	1	93580	high-quality	Xingyun	1	dsDNA,Myoviridae,Spo1virus	0.997375456807838,0.9980958295830529,0.9979501986433842	Bacteria,Bacillaceae,Bacillus	0.9980409645210939,0.9986012727599914,0.9986814511844169
SRR9214415_k141_1560767_self_circular	SRR9214415_k141_1560767_self_circular	1	93561	circular	Jiricka_pond	1	dsDNA,Myoviridae,T4virus	0.9946248010223527,0.9963555943675648,0.9955449881805809	Bacteria,Bacillaceae,Bacillus	0.9967559887919808,0.9975706316357748,0.9978183221900054
SRR6754099_k141_1799618_self_circular	SRR6754099_k141_1799618_self_circular	1	93522	circular	Rimov	1	dsDNA,Myoviridae,T4virus	0.9950970226217968,0.9966582439702584,0.9964238680633234	Bacteria,Bacillaceae,Bacillus	0.996820711156715,0.9980286943576488,0.9982086820367242
SRR9214417_k141_899818_extended_partial	SRR9214417_k141_899818_extended_partial	1	93361	high-quality	Jiricka_pond	1	dsDNA,Myoviridae,T4virus	0.9951404614039414,0.9961727435659374,0.9952832527923033	Bacteria,Bacillaceae,Bacillus	0.9965397213781128,0.9973824987321478,0.9976643469171331
ERS4600551_contig-140_102_self_circular	ERS4600550_contig-140_202_extended_circular,ERS4600551_contig-140_102_self_circular,ERS4600546_contig-140_40_self_circular,ERS4600544_contig-140_49_self_circular,ERS4600541_contig-140_28_self_circular,ERS4600543_contig-140_251_extended_circular,ERS4600542_contig-140_49_self_circular,ERS4600545_contig-140_36_self_circular,ERS4600547_contig-140_533_extended_circular,ERS4600548_contig-140_43_self_ci…	10	93164	circular	Mekkojärvi	1	dsDNA,Siphoviridae,Prtbvirus	0.9544579400488756,0.9715698529469717,0.9779811660724814	Bacteria,Enterobacteriaceae,Pseudomonas	0.9729129010616047,0.9853031393655831,0.9863807786811476
ERS4600505_contig-140_2800_extended_partial	ERS4600505_contig-140_2800_extended_partial,ERS4600506_contig-140_1938_extended_partial,ERS4600504_contig-140_2490_extended_partial,ERS4600523_contig-140_1115_extended_partial	4	93250	high-quality	Mekkojärvi	1	dsDNA,Myoviridae,T4virus	0.99720590543237,0.9979161313814535,0.9975892793184962	Bacteria,Bacillaceae,Bacillus	0.9978546903982004,0.9984724426194644,0.9985838612227371
SRR9302962_k141_3534022_self_circular	SRR9302962_k141_3534022_self_circular	1	93225	circular	Erhai	1	dsDNA,Myoviridae,T4virus	0.9959882182812815,0.9924258784325903,0.985194042351541	Bacteria,Bacillaceae,Bacillus	0.9972358814475709,0.9930390825658056,0.9932511119833967
SRR9302964_k141_268384_self_circular	SRR9302964_k141_268384_self_circular	1	93102	circular	Xingyun	1	dsDNA,Myoviridae,Cba41virus	0.906372609465731,0.9559014308075228,0.9685311410009864	Bacteria,Flavobacteriaceae,Cellulophaga	0.9383606298591105,0.9704549544391186,0.9723039688753082
SRR9302965_k141_878781_extended_partial	SRR9302965_k141_878781_extended_partial	1	93074	high-quality	Dianchi	1	dsDNA,Myoviridae,T4virus	0.9954935766652467,0.9970901501741023,0.9964431538287755	Bacteria,Bacillaceae,Bacillus	0.9972248312877383,0.9980389189719764,0.9981262727357503
SRR6754094_k141_4069411_extended_partial	SRR6754094_k141_4069411_extended_partial	1	92954	high-quality	Rimov	1	dsDNA,Podoviridae,Cba41virus	0.9931324686680268,0.9957960078625845,0.9961676428937465	Bacteria,Flavobacteriaceae,Cellulophaga	0.9956920162595209,0.9975644968671782,0.9978530208430472
SRR9214416_k141_124482_extended_circular	SRR9214416_k141_124482_extended_circular	1	92925	circular	Jiricka_pond	1	dsDNA,Podoviridae,Cba41virus	0.9946248010223527,0.9966629728703005,0.9966718279048495	Bacteria,Flavobacteriaceae,Cellulophaga	0.9968601760132602,0.9979387177515664,0.9980828994194482
SRR9214418_k141_1322120_self_circular	SRR9214416_k141_774645_extended_circular,SRR9214418_k141_1322120_self_circular	2	92893	circular	Jiricka_pond	1	dsDNA,Myoviridae,T4virus	0.9926644508216936,0.9943426592496497,0.9945834550173296	Bacteria,Bacillaceae,Bacillus	0.9951963376613125,0.9973497799662997,0.9976057929401253
SRR6754101_k141_3679556_extended_partial	SRR6754101_k141_3679556_extended_partial	1	92838	circular	Rimov	1	dsDNA,Podoviridae,Cba41virus	0.9973698518036903,0.9981320844833755,0.9982918322028201	Bacteria,Flavobacteriaceae,Cellulophaga	0.9980283357669995,0.9987934955093494,0.9988375951231043
SRR12053438_k141_1305624_self_circular	SRR12053438_k141_1305624_self_circular,SRR12053442_k141_1628746_self_circular,SRR12053440_k141_726947_self_circular	3	92761	circular	Baikal	1	dsDNA,Myoviridae,T4virus	0.9971344416294868,0.9932676226400818,0.987293435676462	Bacteria,Enterobacteriaceae,Bacillus	0.9978436402383677,0.9931658677834672,0.9935070145495789
ERR2814752_NODE_23_length_92691_cov_15.327946	ERR2814752_NODE_23_length_92691_cov_15.327946	1	92691	high-quality	Soyang	1	dsDNA,Myoviridae,T4virus	0.9944846759186602,0.9966251416699637,0.9966139706084934	Bacteria,Bacillaceae,Bacillus	0.996811239591144,0.9977117313134949,0.9979072374884247
SRR6754087_k141_2403789_self_circular	SRR6754087_k141_2403789_self_circular	1	92661	circular	Rimov	1	dsDNA,Podoviridae,Cba41virus	0.9911230746810753,0.9961932354661198,0.9963246841267129	Bacteria,Flavobacteriaceae,Cellulophaga	0.9950889932515096,0.9976074402473538,0.9978443461797867
SRR6754101_k141_857737_self_circular	SRR6754101_k141_857737_self_circular,SRR6754100_NODE_217_length_91101_cov_3.931893_extended_circular	2	92658	circular	Rimov	1	dsDNA,Myoviridae,T4virus	0.9793791897406005,0.9783763164075492,0.9818796458031419	Bacteria,Bacillaceae,Bacillus	0.9861762500493311,0.9921004629705368,0.9928520774734175
SRR6754086_k141_3149716_self_circular	SRR6754088_k141_1903304_extended_partial,SRR6754092_k141_2845426,SRR6754086_k141_3149716_self_circular,SRR6754096_k141_1149823_self_circular,SRR6754094_k141_2883038_self_circular,SRR6754097_k141_1646737_extended_circular,SRR6754098_k141_2312270_self_circular	7	36822	circular	Rimov	1	dsDNA,Siphoviridae,Lambdavirus	0.9979527722350514,0.9983023248848907,0.9981623420633565	Bacteria,Enterobacteriaceae,Escherichia	0.9983030111685544,0.9985828684542019,0.9986684391895262
SRR9214414_k141_341164_extended_partial	SRR9214414_k141_341164_extended_partial,ERS4600539_contig-140_96_extended_partial,ERS4600535_contig-140_728_extended_partial,ERS4600544_contig-140_103_extended_partial,ERS4600511_contig-140_95_extended_partial	5	92469	high-quality	Mekkojärvi,Jiricka_pond	2	dsDNA,Siphoviridae,Xp10virus	0.9650345828755913,0.9769340018947126,0.9831607716510268	Bacteria,Flavobacteriaceae,Xanthomonas	0.9793314653301235,0.9894032097109297,0.9872525823388193
ERS4600497_contig-140_66_self_circular	ERS4600496_contig-140_198_extended_circular,ERS4600497_contig-140_66_self_circular,ERS4600495_contig-140_74_self_circular	3	92237	circular	Loclat	1	dsDNA,Siphoviridae,Cp8virus	0.8905104477277314,0.918937195478541,0.9468980223825083	Bacteria,Mycobacteriaceae,Mycobacterium	0.8972919215438652,0.943140919724508,0.9466616642775199
SRR6754086_k141_1289272_self_circular	SRR6754092_k141_527581_extended_partial,SRR6754086_k141_1289272_self_circular,SRR6754094_k141_2527900	3	59575	circular	Rimov	1	dsDNA,Myoviridae,T4virus	0.9978448759052082,0.9965573607693605,0.9958535604278134	Bacteria,Enterobacteriaceae,Synechococcus	0.9981846165989187,0.9970921196852455,0.9972696497387842
SRR8894380_k141_3937942_self_circular	SRR8894380_k141_3937942_self_circular	1	92149	circular	Fuxian	1	dsDNA,Siphoviridae,Sitaravirus	0.9972535479676254,0.9977963325803874,0.9977656063169147	Bacteria,Streptomycetaceae,Streptomyces	0.9979478274596472,0.9984090500106336,0.9985404879064351
ERS4600520_contig-140_109_extended_circular	ERS4600520_contig-140_109_extended_circular	1	92104	circular	Mekkojärvi	1	dsDNA,Myoviridae,Spo1virus	0.9571399345335515,0.937646300345052,0.911519663215433	Bacteria,Bacillaceae,Bacillus	0.9745309601799598,0.9290473113354164,0.9348597849117245
ERR2814753_NODE_43_length_92155_cov_63.618410_self_circular	ERR2814753_NODE_43_length_92155_cov_63.618410_self_circular,ERR2814725_NODE_45_length_47598_cov_37.420425_extended_circular	2	92028	circular	Soyang	1	dsDNA,Myoviridae,T4virus	0.9947158823397529,0.9964344093682662,0.9963908067511199	Bacteria,Bacillaceae,Bacillus	0.9969043766525909,0.9976790125476467,0.9978682015037529
ERR3687830_contig-140_35_extended_circular	ERR3687828_contig-140_41_extended_partial,ERR3687830_contig-140_35_extended_circular	2	91562	circular	Lake_Rotsee	1	dsDNA,Myoviridae,T4virus	0.9931829137053562,0.9949700266552333,0.994139882411933	Bacteria,Bacillaceae,Bacillus	0.9958451399029165,0.997319106123317,0.9975537449605628
SRR6754089_k141_2592264	SRR6754089_k141_2592264,SRR6754087_k141_2445023_extended_partial	2	91744	high-quality	Rimov	1	dsDNA,Myoviridae,T4virus	0.9946163935161312,0.9949842133553595,0.9954044776037161	Bacteria,Bacillaceae,Bacillus	0.9962050593946091,0.9973927233464753,0.9976253109324612
SRR9302965_k141_236742_extended_partial	SRR9302965_k141_236742_extended_partial	1	91528	high-quality	Dianchi	1	dsDNA,Myoviridae,T4virus	0.9948490011882609,0.9965006139688555,0.9952474363707495	Bacteria,Bacillaceae,Bacillus	0.9967181025296973,0.9974111276522649,0.9976318169299065
SRR9214418_k141_946473_self_circular	SRR9214418_k141_946473_self_circular	1	91462	circular	Jiricka_pond	1	dsDNA,Podoviridae,Cba41virus	0.9944090083626662,0.9966629728703005,0.9968591753406693	Bacteria,Flavobacteriaceae,Cellulophaga	0.9967386242551008,0.997957122057356,0.9981132607408596
SRR8894380_k141_825984_extended_partial	SRR8894380_k141_825984_extended_partial	1	91446	high-quality	Fuxian	1	dsDNA,Myoviridae,Nit1virus	0.8168382732103222,0.9136865401318102,0.9530171202495027	Bacteria,Enterobacteriaceae,Bacillus	0.8770448715418919,0.9489219166653033,0.9531871797151674
ERS4600401_contig-140_257_extended_partial	ERS4600401_contig-140_257_extended_partial	1	91367	high-quality	SAS2	1	dsDNA,Myoviridae,T4virus	0.9969901127726835,0.9975945661785917,0.9970189716829861	Bacteria,Bacillaceae,Bacillus	0.9976621018982595,0.998290444484434,0.99843639194731
ERS4600511_contig-140_127_extended_partial	ERS4600511_contig-140_127_extended_partial	1	91084	high-quality	Mekkojärvi	1	dsDNA,Myoviridae,T4virus	0.9946696410555343,0.9966078023698094,0.9958480502091128	Bacteria,Bacillaceae,Bacillus	0.9965855006117053,0.9978057977653083,0.9980069961159195
SRR9302966_k141_2094605_extended_circular	SRR9302966_k141_2094605_extended_circular	1	90996	circular	Dianchi	1	dsDNA,Podoviridae,Cba41virus	0.9942800932672691,0.9967165670707775,0.9963908067511199	Bacteria,Flavobacteriaceae,Cellulophaga	0.9963897549232409,0.9975133737955404,0.9977727802078883
ERR3687829_contig-140_42_extended_partial	ERR3687829_contig-140_42_extended_partial	1	90993	high-quality	Lake_Rotsee	1	dsDNA,Myoviridae,T4virus	0.9970629778266036,0.9972083726751545,0.9969528490585792	Bacteria,Bacillaceae,Bacillus	0.9976621018982595,0.9979816611317421,0.9981501280597164
SRR6754087_k141_2986588_extended_partial	SRR6754087_k141_2986588_extended_partial	1	90863	high-quality	Rimov	1	dsDNA,Myoviridae,T4virus	0.991467782436159,0.9928546320364062,0.993646717838231	Bacteria,Bacillaceae,Bacillus	0.9945522712024942,0.9969571547761218,0.9972110957617764
SRR6754099_k141_1130467_extended_circular	SRR6754099_k141_1130467_extended_circular	1	90659	circular	Rimov	1	dsDNA,Myoviridae,T4virus	0.9951642826715692,0.996803263571549,0.9961951939872493	Bacteria,Bacillaceae,Bacillus	0.9970069852796085,0.9980021103603972,0.9981696460520523
ERS4600472_contig-140_56_self_circular	ERS4600472_contig-140_56_self_circular	1	90601	circular	Loclat	1	dsDNA,Myoviridae,T4virus	0.9958340806672197,0.9969671987730081,0.996561623530838	Bacteria,Bacillaceae,Bacillus	0.9971253798492442,0.9981616143439069,0.9982954286693283
SRR6754086_k141_3686909_extended_partial	SRR6754086_k141_3686909_extended_partial	1	90511	high-quality	Rimov	1	dsDNA,Podoviridae,Cba41virus	0.9922272604981728,0.9955721732605923,0.9959417239270226	Bacteria,Flavobacteriaceae,Cellulophaga	0.9951742373416472,0.9974438464181131,0.9977337442232165
SRR6754099_k141_742607_self_circular	SRR6754099_k141_742607_self_circular,SRR6754087_k141_1288882_self_circular	2	90396	circular	Rimov	1	dsDNA,Myoviridae,T4virus	0.9944132121157769,0.9957203454619111,0.9956469272265416	Bacteria,Bacillaceae,Bacillus	0.9965855006117053,0.9974642956467682,0.9977337442232165
ERS4600403_contig-140_26_extended_circular	ERS4600403_contig-140_26_extended_circular	1	90136	circular	SAS2	1	dsDNA,Myoviridae,Vegasvirus	0.9919217877721229,0.9927096124351156,0.988737112976014	Bacteria,Bacillaceae,Bacillus	0.9954157622637042,0.9942680812079768,0.9943376135567638
SRR6754089_k141_145994	SRR6754089_k141_145994,SRR6754087_k141_1352763	2	90086	high-quality	Rimov	1	dsDNA,Myoviridae,T4virus	0.994940082505661,0.9963445602674665,0.9960271323168817	Bacteria,Bacillaceae,Bacillus	0.9967449386321481,0.9976831023933778,0.9979354301440211
SRR6754099_k141_75872_self_circular	SRR6754099_k141_75872_self_circular	1	89944	circular	Rimov	1	dsDNA,Myoviridae,T4virus	0.995640708024124,0.9926103055342317,0.9862547594514026	Bacteria,Enterobacteriaceae,Synechococcus	0.9968759619558782,0.993650514502593,0.9930667753891128
ERS4600511_contig-140_45_extended_partial	ERS4600511_contig-140_45_extended_partial	1	89828	high-quality	Mekkojärvi	1	dsDNA,Myoviridae,T4virus	0.9963455372956976,0.9975189037779183,0.9971457067130994	Bacteria,Bacillaceae,Bacillus	0.9974174197876791,0.9981616143439069,0.9982889226718831
SRR9214416_k141_1064190_self_circular	SRR9214416_k141_1064190_self_circular,SRR9214418_k141_165215_self_circular	2	89775	circular	Jiricka_pond	1	dsDNA,Myoviridae,T4virus	0.9962516534762236,0.9975189037779183,0.9971071351821954	Bacteria,Bacillaceae,Bacillus	0.9975484431114093,0.9982066026469482,0.9983648259754117
SRR8894382_k141_1597226_extended_partial	SRR8894382_k141_1597226_extended_partial	1	89769	circular	Fuxian	1	dsDNA,Siphoviridae,Phic31virus	0.9810200547048404,0.9468408583268837,0.9639163328392504	Bacteria,Rhodospirillaceae,Azospirillum	0.989772287777734,0.9672505603088651,0.9696842205706627
SRR9214414_k141_735074_extended_circular	SRR9214414_k141_735074_extended_circular	1	89711	circular	Jiricka_pond	1	dsDNA,Myoviridae,T4virus	0.9938947492321144,0.9966393283700901,0.9961951939872493	Bacteria,Bacillaceae,Bacillus	0.9964276411855243,0.9979325829829698,0.9980633814271123
SRR6754092_k141_3142252_self_circular	SRR6754094_k141_4097900_extended_circular,SRR6754092_k141_3142252_self_circular,SRR6754086_k141_1017766_self_circular	3	89700	circular	Rimov	1	dsDNA,Siphoviridae,T4virus	0.9791830145954308,0.9805847127272039,0.9835519971787681	Bacteria,Bacillaceae,Bacillus	0.98792848967994,0.9912027418325781,0.9922817183640452
SRR6754098_k141_1139950_extended_circular	SRR6754098_k141_1139950_extended_circular	1	89431	circular	Rimov	1	dsDNA,Siphoviridae,Sitaravirus	0.99677291886196,0.9973202899761506,0.9973440745863204	Bacteria,Streptomycetaceae,Streptomyces	0.9976478945499033,0.9981861534182931,0.9983691633070418
SRR9214416_k141_284195	SRR9214416_k141_284195	1	89383	high-quality	Jiricka_pond	1	dsDNA,Podoviridae,Cba41virus	0.9964015873371747,0.9975031407777779,0.9973440745863204	Bacteria,Flavobacteriaceae,Cellulophaga	0.9975879079679545,0.9984479035450783,0.9985643432304012
SRR6754088_k141_3360378_self_circular	SRR6754088_k141_3360378_self_circular,SRR6754102_k141_2500966_self_circular,SRR6754096_k141_2049817_self_circular,SRR6754100_NODE_5504_length_15940_cov_9.658446_extended_partial,SRR6754098_k141_1840047_self_circular	5	89322	circular	Rimov	1	dsDNA,Siphoviridae,Spbetavirus	0.9542785799161492,0.9556523754053061,0.9562158022051895	Bacteria,Mycobacteriaceae,Mycobacterium	0.974063696278464,0.9717677949187756,0.9748521512080552
SRR9302961_k141_3257766_extended_circular	SRR9302961_k141_3257766_extended_circular	1	89281	circular	Erhai	1	dsDNA,Myoviridae,Vi1virus	0.9263348317377755,0.8152418753556527,0.8570676820162992	Bacteria,Synechococcaceae,Synechococcus	0.9517771024902324,0.8540047769398138,0.8681624677682043
SRR8894380_k141_5021596_extended_circular	SRR8894380_k141_5021596_extended_circular	1	89237	circular	Fuxian	1	dsDNA,Podoviridae,Cba41virus	0.9897456449117772,0.9950772150561872,0.9959362137083221	Bacteria,Flavobacteriaceae,Cellulophaga	0.9941623584198271,0.9975644968671782,0.9978204908558206
SRR8894380_k141_2615480_extended_partial	SRR8894380_k141_2615480_extended_partial	1	89082	high-quality	Fuxian	1	dsDNA,Myoviridae,T4virus	0.9934239288837073,0.9951276566566362,0.9952501914800999	Bacteria,Bacillaceae,Bacillus	0.9954883775997474,0.9973579596577618,0.9976469975906123
ERR2814752_NODE_258_length_31788_cov_7.135340_extended_partial	ERR2814752_NODE_258_length_31788_cov_7.135340_extended_partial	1	89032	high-quality	Soyang	1	dsDNA,Myoviridae,T4virus	0.9931436786763223,0.9956446830612377,0.9953411100886594	Bacteria,Bacillaceae,Bacillus	0.9960172066774537,0.9972843424346034,0.9975385642998571
ERR2814725_NODE_590_length_13043_cov_23.926990_extended_circular	ERR2814725_NODE_590_length_13043_cov_23.926990_extended_circular	1	88967	circular	Soyang	1	dsDNA,Myoviridae,T4virus	0.9940110530681793,0.9931336371388894,0.9937844733057455	Bacteria,Synechococcaceae,Synechococcus	0.9964355341568334,0.9975869910186987,0.9978465148456018
SRR6475630_k141_3082794_extended_circular	SRR6475630_k141_3082794_extended_circular	1	88797	circular	Zurich	1	dsDNA,Podoviridae,Cba41virus	0.9972451404614039,0.9980832191829406,0.9982697913280179	Bacteria,Flavobacteriaceae,Cellulophaga	0.997916255574411,0.9987362376691151,0.998768197817021
ERS4600334_contig-140_1102_extended_circular	ERS4600334_contig-140_1102_extended_circular	1	88516	circular	Alinen_Mustajärvi	1	dsDNA,Podoviridae,Cba41virus	0.9860071071452593,0.9942811835491026,0.9949361090141667	Bacteria,Flavobacteriaceae,Cellulophaga	0.9925016772564031,0.9970921196852455,0.9974192876800264
SRR8894379_k141_3025935	SRR8894379_k141_3025935	1	88472	circular	Fuxian	1	dsDNA,Myoviridae,P2virus	0.9963483397977715,0.9917370353264596,0.9786616780820031	Bacteria,Bacillaceae,Bacillus	0.997493192312246,0.9380449719436583,0.9365968862296227
SRR6754086_k141_1266545_extended_partial	SRR6754086_k141_1266545_extended_partial	1	88459	high-quality	Rimov	1	dsDNA,Podoviridae,Cba41virus	0.9945575409725803,0.9967701612712544,0.9966360114832957	Bacteria,Flavobacteriaceae,Cellulophaga	0.9963755475748846,0.9976953719305708,0.9979375988098362
ERR2814752_NODE_27_length_83453_cov_7.073662_extended_partial	ERR2814752_NODE_27_length_83453_cov_7.073662_extended_partial	1	88419	circular	Soyang	1	dsDNA,Siphoviridae,Sitaravirus	0.9958340806672197,0.9967827716713666,0.9965313173279847	Bacteria,Streptomycetaceae,Streptomyces	0.9972469316074036,0.9978896396027942,0.998080730753633
SRR9302965_k141_257119_extended_partial	SRR9302965_k141_257119_extended_partial	1	88337	high-quality	Dianchi	1	dsDNA,Podoviridae,Cba41virus	0.9861612447593211,0.9927159176351716,0.9941288619745318	Bacteria,Flavobacteriaceae,Cellulophaga	0.9927084731047002,0.997002143079163,0.9972609750755238
ERS4600484_contig-140_587_extended_partial	ERS4600484_contig-140_587_extended_partial	1	87982	circular	Loclat	1	dsDNA,Myoviridae,T4virus	0.9925453444835549,0.9882723278956237,0.9891696651440096	Bacteria,Synechococcaceae,Synechococcus	0.9956920162595209,0.9971473326026142,0.9974127816825811
SRR6754098_k141_1403447_self_circular	SRR6754098_k141_1403447_self_circular	1	87796	circular	Rimov	1	dsDNA,Podoviridae,Cba41virus	0.9942226419747551,0.9971941859750283,0.9973468296956706	Bacteria,Flavobacteriaceae,Cellulophaga	0.9966596945420103,0.9982352315670653,0.9983886812993779
ERS4600549_contig-140_466_extended_partial	ERS4600549_contig-140_466_extended_partial	1	87668	circular	Mekkojärvi	1	dsDNA,Myoviridae,Vi1virus	0.9864372912135955,0.9778088484024987,0.9724847229186526	Bacteria,Bacillaceae,Bacillus	0.99241169738348,0.97162465031819,0.9749475725039198
SRR9214417_k141_1620501_self_circular	SRR9214418_k141_645113_extended_circular,SRR9214417_k141_1620501_self_circular	2	87511	circular	Jiricka_pond	1	dsDNA,Myoviridae,Septima3virus	0.9784725803197094,0.97972247661953,0.9697957361927695	Bacteria,Pseudomonadaceae,Pseudomonas	0.9872228580449111,0.963011435208664,0.9676348313753895
SRR6754095_k141_990079_extended_partial	SRR6754095_k141_990079_extended_partial,SRR6754101_k141_547580_extended_partial	2	87283	circular	Rimov	1	dsDNA,Podoviridae,Cba41virus	0.996450631123467,0.9977332805798262,0.9976884632551066	Bacteria,Flavobacteriaceae,Cellulophaga	0.9975310785745294,0.9983681515533234,0.9985166325824689
SRR6754103_k141_402878_extended_partial	SRR6754103_k141_402878_extended_partial	1	87228	high-quality	Rimov	1	dsDNA,Myoviridae,T4virus	0.9928171871847186,0.9937058340439819,0.9902799742121765	Bacteria,Enterobacteriaceae,Synechococcus	0.995035321046608,0.9950574214340635,0.9951096585869408
SRR9302965_k141_425711_extended_partial	SRR9302965_k141_425711_extended_partial	1	87188	high-quality	Dianchi	1	dsDNA,Myoviridae,T4virus	0.9943473533170415,0.9961301834655586,0.9959968261140285	Bacteria,Bacillaceae,Bacillus	0.9967165239354355,0.9975256433327335,0.9978226595216357
ERS4600544_contig-140_57_self_circular	ERS4600547_contig-140_563_extended_circular,ERS4600549_contig-140_921_extended_circular,ERS4600544_contig-140_57_self_circular	3	87084	circular	Mekkojärvi	1	dsDNA,Siphoviridae,Cba41virus	0.9890352106360558,0.9751890377791824,0.9764217741802173	Bacteria,Flavobacteriaceae,Cellulophaga	0.9940360708788823,0.9842152404011321,0.9858798168778585
SRR6754094_k141_4036189_extended_partial	SRR6754094_k141_4036189_extended_partial	1	87070	high-quality	Rimov	1	dsDNA,Podoviridae,Cba41virus	0.997243739210367,0.9983023248848907,0.9984929551853913	Bacteria,Flavobacteriaceae,Cellulophaga	0.9979067840088401,0.9988343939666596,0.9988701251103309
ERS4600521_contig-140_34_self_circular	ERS4600515_contig-140_58_extended_partial,ERS4600521_contig-140_34_self_circular,ERS4600520_contig-140_22_self_circular,ERS4600512_contig-140_21_self_circular,ERS4600514_contig-140_27_self_circular	5	85581	circular	Mekkojärvi	1	dsDNA,Podoviridae,Prtbvirus	0.9831611662892631,0.9856540935723215,0.9618252048423802	Bacteria,Enterobacteriaceae,Mycobacterium	0.9911567149453412,0.9621914211395947,0.966873629674288
SRR9302962_k141_3534037_self_circular	SRR9302962_k141_3534037_self_circular	1	86910	circular	Erhai	1	dsDNA,Myoviridae,Pakpunavirus	0.9975380019281215,0.9971973385750563,0.9910128332993536	Bacteria,Pseudomonadaceae,Pseudomonas	0.9981451517423734,0.9973456901205686,0.9973780830295393
ERR2814753_NODE_161_length_38498_cov_50.829950_extended_partial	ERR2814753_NODE_161_length_38498_cov_50.829950_extended_partial,ERR2814725_NODE_196_length_26472_cov_112.454356_extended_partial	2	86867	circular	Soyang	1	dsDNA,Myoviridae,T4virus	0.9925579557428873,0.9911143968209182,0.9929386547352065	Bacteria,Synechococcaceae,Synechococcus	0.9953794545956826,0.9969735141590459,0.9972935050627504
ERS4600569_NODE_335_length_55896_cov_7.046603_extended_circular	ERS4600569_NODE_335_length_55896_cov_7.046603_extended_circular	1	86533	circular	Björntjärnan	1	dsDNA,Siphoviridae,Bxz1virus	0.9671154406654261,0.9628182352690823,0.9712642094764741	Bacteria,Streptomycetaceae,Streptomyces	0.9802391570306642,0.9726614262110033,0.9744856466853027
SRR9214416_k141_832926_extended_partial	SRR9214416_k141_832926_extended_partial	1	86527	high-quality	Jiricka_pond	1	dsDNA,Siphoviridae,Lambdavirus	0.9983885613075354,0.9987184680885943,0.9988400989635279	Bacteria,Enterobacteriaceae,Escherichia	0.9985918939184656,0.9992004351595858,0.9991954249825965
SRR6754094_k141_388257_self_circular	SRR6754094_k141_388257_self_circular	1	86504	circular	Rimov	1	dsDNA,Myoviridae,T4virus	0.9862271035580567,0.992249332831019,0.9904673216479962	Bacteria,Enterobacteriaceae,Bacillus	0.9917676309246616,0.9949122319106123,0.9946650820948444
SRR9214414_k141_1739608_extended_circular	SRR9214414_k141_1739608_extended_circular	1	86392	circular	Jiricka_pond	1	dsDNA,Podoviridae,Cba41virus	0.9960568795820909,0.9971027605742145,0.9972862172899642	Bacteria,Flavobacteriaceae,Cellulophaga	0.9972469316074036,0.9982863546387031,0.9984255486182346
SRR9302959_k141_2403832_self_circular	SRR9302959_k141_2403832_self_circular	1	86391	circular	Fuxian	1	dsDNA,Myoviridae,T4virus	0.8321721633074008,0.8944525273606275,0.949449253640877	Bacteria,Synechococcaceae,Synechococcus	0.8916295039267532,0.9127635905573642,0.9146456508491411
SRR8894379_k141_265051_extended_partial	SRR8894379_k141_265051_extended_partial	1	86256	circular	Fuxian	1	dsDNA,Podoviridae,Vp5virus	0.9918937627513844,0.9892921940047005,0.9708895146048346	Bacteria,Bacillaceae,Bacillus	0.994594893247563,0.9445682758846337,0.9546705471326985
ERS4600478_contig-140_368_extended_partial	ERS4600478_contig-140_368_extended_partial	1	86218	high-quality	Loclat	1	dsDNA,Siphoviridae,Cba41virus	0.9671182431675,0.9599083854431846,0.9508460940814741	Bacteria,Mycobacteriaceae,Mycobacterium	0.9794214452030466,0.9703404387586501,0.974303478756834
ERS4600336_contig-140_3690_extended_circular	ERS4600336_contig-140_3690_extended_circular	1	86029	circular	Alinen_Mustajärvi	1	dsDNA,Siphoviridae,Vegasvirus	0.8007266887877497,0.8594949219495048,0.9231710206578099	Bacteria,Enterobacteriaceae,Pseudomonas	0.8625581120012629,0.8949073240957351,0.8977387321545912
SRR6754092_k141_2369941_self_circular	SRR6754098_k141_1410510_extended_partial,SRR6754088_k141_386238_extended_partial,SRR6754101_k141_3561670_extended_partial,SRR6754094_k141_780023_extended_circular,SRR6754086_k141_2572665_extended_circular,SRR6754096_k141_2343090_extended_circular,SRR6754092_k141_2369941_self_circular,SRR6754101_k141_409121_extended_partial	8	42991	circular	Rimov	1	dsDNA,Siphoviridae,T4virus	0.9874714144788467,0.9903073312137353,0.991671304434073	Bacteria,Synechococcaceae,Synechococcus	0.9907920596708631,0.9953212164837142,0.9956409817116412
ERS4600319_contig-140_119_self_circular	ERS4600318_contig-140_154_extended_circular,ERS4600319_contig-140_119_self_circular	2	85575	circular	Alinen_Mustajärvi	1	dsDNA,Siphoviridae,Bxz1virus	0.9903313678452123,0.9914469961238782,0.9878196615623674	Bacteria,Mycobacteriaceae,Mycobacterium	0.9946296223213229,0.9964663732883996,0.9967123026243025
SRR6754094_k141_2830983_extended_partial	SRR6754094_k141_2830983_extended_partial	1	85475	circular	Rimov	1	dsDNA,Siphoviridae,Vegasvirus	0.8902582225410847,0.8587335690427288,0.9325990048545026	Bacteria,Synechococcaceae,Synechococcus	0.9264059355144244,0.9411123562419226,0.9489431007150091
SRR6754102_k141_2770903_self_circular	SRR6754102_k141_2770903_self_circular	1	85368	circular	Rimov	1	dsDNA,Siphoviridae,Sitaravirus	0.9744299710781786,0.93644831233439,0.9612301012227176	Bacteria,Bacillaceae,Bacillus	0.9851280634594893,0.9713322263484221,0.9750560057946751
SRR6754089_k141_48981_extended_partial	SRR6754089_k141_48981_extended_partial	1	85350	circular	Rimov	1	dsDNA,Myoviridae,Cba41virus	0.989279028316481,0.9925976951341194,0.9916106920283666	Bacteria,Flavobacteriaceae,Cellulophaga	0.993922412092032,0.9960819277896837,0.9960313415583599
SRR6475630_k141_1985603_extended_circular	SRR6475630_k141_1985603_extended_circular	1	85347	circular	Zurich	1	dsDNA,Podoviridae,Cba41virus	0.9921782167118803,0.996421798968154,0.9966360114832957	Bacteria,Flavobacteriaceae,Cellulophaga	0.9951426654564111,0.9977894383823842,0.9979896467893987
SRR5896114_k141_197426_extended_partial	SRR5896114_k141_197426_extended_partial	1	85305	high-quality	Baikal	1	dsDNA,Myoviridae,T4virus	0.9878665672712598,0.9917291538263895,0.9925942660664202	Bacteria,Bacillaceae,Bacillus	0.9923043529736769,0.9959633222634843,0.9962937501219874
SRR9214418_k141_303564_self_circular	SRR9214418_k141_303564_self_circular	1	85083	circular	Jiricka_pond	1	dsDNA,Myoviridae,T4virus	0.9928452122054571,0.9956383778611816,0.995214375058546	Bacteria,Bacillaceae,Bacillus	0.9958688188168436,0.9975583620985816,0.9976665155829482
SRR6754089_k141_2302101_extended_circular	SRR6754089_k141_2302101_extended_circular	1	85060	circular	Rimov	1	dsDNA,Myoviridae,T4virus	0.9842317220814744,0.9770396139956525,0.9795763743862994	Bacteria,Bacillaceae,Bacillus	0.9906720865069656,0.9861824561977522,0.9867169218824887
SRR7054680_k141_2374715_self_circular	SRR7054680_k141_2374715_self_circular	1	85048	circular	Zurich	1	dsDNA,Siphoviridae,T4virus	0.9890674394099052,0.9746278749741881,0.9820201563800067	Bacteria,Bacillaceae,Bacillus	0.9942318165673468,0.988288726749227,0.9896337774038034
SRR6754094_k141_1093571_self_circular	SRR6754094_k141_1093571_self_circular	1	84979	circular	Rimov	1	dsDNA,Myoviridae,Cba41virus	0.9795291236015514,0.9837672624555286,0.9869049652580711	Bacteria,Flavobacteriaceae,Synechococcus	0.9871091992580607,0.9928427699707167,0.9936349658326701
SRR6754097_k141_67636_extended_partial	SRR6754097_k141_67636_extended_partial	1	84927	high-quality	Rimov	1	dsDNA,Siphoviridae,Prtbvirus	0.9687871331524786,0.9738460301672297,0.9765925909599352	Bacteria,Mycobacteriaceae,Mycobacterium	0.9805896049567859,0.9865198684705613,0.986452344653046
ERS4600462_contig-140_77_extended_partial	ERS4600462_contig-140_77_extended_partial	1	84896	high-quality	Loclat	1	dsDNA,Siphoviridae,Mastadenovirus	0.6553454924556644,0.7137029336519561,0.6127418297232217	Bacteria,Enterobacteriaceae,Mycobacterium	0.7360085244090138,0.5031614507500777,0.45594680696488715
ERS4600459_contig-140_85_self_circular	ERS4600459_contig-140_85_self_circular	1	84809	circular	Lovojärvi	1	dsDNA,Siphoviridae,T4virus	0.9921908279712127,0.9926418315345124,0.9932747780759419	Bacteria,Pseudomonadaceae,Pseudomonas	0.9956320296775721,0.9965931585060611,0.9968402539073936
SRR6754103_k141_367007_extended_partial	SRR6754103_k141_367007_extended_partial	1	84736	high-quality	Rimov	1	dsDNA,Podoviridae,Cba41virus	0.9931016411452145,0.9963492891675086,0.9965671337495385	Bacteria,Flavobacteriaceae,Cellulophaga	0.9956636015628083,0.9978098876110393,0.9979853094577685
ERS4600506_contig-140_512_extended_circular	ERS4600507_contig-140_1884_extended_partial,ERS4600506_contig-140_512_extended_circular,ERS4600505_contig-140_330_extended_circular,ERS4600552_contig-140_141_extended_circular,ERS4600511_contig-140_596_extended_circular	5	84529	circular	Mekkojärvi	1	dsDNA,Podoviridae,Cba41virus	0.9937854516512342,0.9964344093682662,0.9968261140284658	Bacteria,Flavobacteriaceae,Cellulophaga	0.9960029993290974,0.9977117313134949,0.997954948136357
SRR6754101_k141_3036230_extended_circular	SRR6754101_k141_3036230_extended_circular	1	84360	circular	Rimov	1	dsDNA,Podoviridae,Cba41virus	0.9954277178665112,0.9974259020770905,0.9976002997558973	Bacteria,Flavobacteriaceae,Cellulophaga	0.9971459015746478,0.9983211183274167,0.9984710906003518
SRR8894379_k141_1567198_extended_partial	SRR8894379_k141_1567198_extended_partial,SRR8894382_k141_1471219	2	84337	high-quality	Fuxian	1	dsDNA,Myoviridae,Cba41virus	0.9917956751787996,0.994468763250772,0.9945531488144764	Bacteria,Flavobacteriaceae,Cellulophaga	0.9951442440506729,0.9966790452664126,0.9971091684684665
SRR9302961_k141_1558725_self_circular	SRR9302961_k141_1558725_self_circular	1	84081	circular	Erhai	1	dsDNA,Myoviridae,T4virus	0.9909268995359056,0.994199215948373,0.9923876328651484	Bacteria,Enterobacteriaceae,Mycobacterium	0.994462291329571,0.9961964434701523,0.9963523040989952
SRR4198832_contig-140_411	SRR4198832_contig-140_411	1	84070	high-quality	Tous	1	dsDNA,Podoviridae,T4virus	0.787186400017936,0.8467757571363043,0.8884125610945498	Bacteria,Enterobacteriaceae,Vibrio	0.8517131694226292,0.8315474340307883,0.813694257156055
ERR2814753_NODE_48_length_84110_cov_18.875165_self_circular	ERR2814753_NODE_48_length_84110_cov_18.875165_self_circular	1	83983	circular	Soyang	1	dsDNA,Myoviridae,T4virus	0.9929447010290787,0.9886790132992432,0.9831387307762245	Bacteria,Enterobacteriaceae,Pseudomonas	0.9958467184971783,0.992583064766797,0.9918978645147719
SRR9302965_k141_702038_self_circular	SRR9302965_k141_702038_self_circular	1	83920	circular	Dianchi	1	dsDNA,Myoviridae,T4virus	0.984390063448647,0.9883810925965917,0.9844556730456632	Bacteria,Bacillaceae,Bacillus	0.9912672165436679,0.9928161859734651,0.9932055700012795
SRR9214416_k141_1064183_self_circular	SRR9214416_k141_1064183_self_circular	1	83812	circular	Jiricka_pond	1	dsDNA,Myoviridae,Nit1virus	0.9909128870255364,0.9877978615914009,0.9879160903896276	Bacteria,Bacillaceae,Bacillus	0.9950037491613718,0.9950962749685082,0.9955715844055578
SRR5896115_k141_2301570_extended_circular	SRR5896115_k141_2301570_extended_circular	1	83705	circular	Baikal	1	dsDNA,Myoviridae,T4virus	0.9927008833486537,0.9923045033315101,0.9936356974008298	Bacteria,Synechococcaceae,Synechococcus	0.9953715616243735,0.9969142113959462,0.9972631437413388
SRR9214416_k141_174275_self_circular	SRR9214416_k141_174275_self_circular	1	83697	circular	Jiricka_pond	1	dsDNA,Myoviridae,Cba41virus	0.9949106562338856,0.9960166898645485,0.9941867192708879	Bacteria,Flavobacteriaceae,Cellulophaga	0.9969359485378271,0.9974847448754233,0.9977966355318545
SRR6754088_k141_3360398_self_circular	SRR6754088_k141_3360398_self_circular,SRR6754096_k141_595874_self_circular,SRR6754098_k141_2312196_self_circular,SRR6754086_k141_3537749_self_circular,SRR6754101_k141_3690151_self_circular,SRR6754094_k141_4614424_self_circular	6	83622	circular	Rimov	1	dsDNA,Siphoviridae,T4virus	0.9468421406631841,0.9687246314216492,0.9714791080057967	Bacteria,Streptomycetaceae,Streptomyces	0.9660681163423971,0.9813584831580153,0.9821974223238121
ERS4600333_contig-140_126_self_circular	ERS4600333_contig-140_126_self_circular	1	83593	circular	Alinen_Mustajärvi	1	dsDNA,Siphoviridae,Prtbvirus	0.978841109342421,0.9890005785021051,0.983400466164502	Bacteria,Mycobacteriaceae,Mycobacterium	0.9874564899956588,0.9944848430317208,0.9949752013064043
SRR6754100_NODE_2286_length_27227_cov_3.756531_extended_circular	SRR6754100_NODE_2286_length_27227_cov_3.756531_extended_circular,SRR6754101_k141_343377_extended_circular,SRR6754088_k141_1574266_extended_circular	3	83579	circular	Rimov	1	dsDNA,Myoviridae,Cba41virus	0.9836684191646302,0.9857975368735981,0.9784467795526804	Bacteria,Bacillaceae,Bacillus	0.9914945341173684,0.9912620445956779,0.9926634035475035
SRR9302961_k141_1524004_extended_circular	SRR9302961_k141_1524004_extended_circular	1	83186	circular	Erhai	1	dsDNA,Myoviridae,T4virus	0.9853737416765689,0.976137970387628,0.9844226117334597	Bacteria,Synechococcaceae,Synechococcus	0.9917597379533526,0.9961412305527836,0.9963696534255161
ERS4600459_contig-140_742_extended_circular	ERS4600459_contig-140_742_extended_circular,ERS4600456_contig-140_462_extended_circular,ERS4600458_contig-140_541_extended_circular	3	83181	circular	Lovojärvi	1	dsDNA,Podoviridae,Bcep22virus	0.9916149137950362,0.993221909939675,0.9915032427637053	Bacteria,Bacillaceae,Bacillus	0.9950447926121788,0.9959203788833085,0.9960486908848807
ERS4600369_contig-140_3_self_circular	ERS4600369_contig-140_3_self_circular	1	83135	circular	SAS2	1	dsDNA,Podoviridae,Bpp1virus	0.9811825998251239,0.98731236118708,0.9887867049443192	Bacteria,Flavobacteriaceae,Cellulophaga	0.9895276056671534,0.9928059613591376,0.9931925580063888
SRR6754089_k141_2374699_self_circular	SRR6754089_k141_2374699_self_circular	1	83039	circular	Rimov	1	dsDNA,Siphoviridae,T4virus	0.9781572988364011,0.9520190038729691,0.9700492062529962	Bacteria,Synechococcaceae,Synechococcus	0.9873791388768302,0.9875566443633746,0.9887099257665691
SRR6754086_k141_1853623_self_circular	SRR6754094_k141_128490_extended_partial,SRR6754086_k141_1853623_self_circular,SRR6754088_k141_1611449_self_circular	3	56460	circular	Rimov	1	dsDNA,Siphoviridae,Lambdavirus	0.9981979911665134,0.9985214305868407,0.9987050986053636	Bacteria,Enterobacteriaceae,Escherichia	0.9984861281029244,0.9990082124102279,0.9990154257199428
ERS4600487_contig-140_2326_extended_partial	ERS4600487_contig-140_2326_extended_partial,ERS4600490_contig-140_67	2	82772	high-quality	Loclat	1	dsDNA,Siphoviridae,Nit1virus	0.9797098849853149,0.9665887449026398,0.962943779238598	Bacteria,Pseudomonadaceae,Pseudomonas	0.9877958877619479,0.9778637099808595,0.9794930960523777
ERS4600325_contig-140_168_self_circular	ERS4600325_contig-140_168_self_circular,ERS4600323_contig-140_1923_extended_partial	2	82475	circular	Alinen_Mustajärvi	1	dsDNA,Siphoviridae,M12virus	0.9855334842947784,0.9826134108452593,0.9747852392261449	Bacteria,Rhodobacteraceae,Rhodobacter	0.9920817711827618,0.9901884600912854,0.9908330495995559
SRR9214414_k141_431307_extended_circular	SRR9214414_k141_431307_extended_circular	1	82463	circular	Jiricka_pond	1	dsDNA,Podoviridae,Cba41virus	0.9970811940900837,0.9981967127839507,0.9983744854833289	Bacteria,Flavobacteriaceae,Cellulophaga	0.9979052054145783,0.9987750912035598,0.9988072338016929
ERS4600570_NODE_55_length_82484_cov_3.820550_self_circular	ERS4600570_NODE_55_length_82484_cov_3.820550_self_circular	1	82448	circular	Björntjärnan	1	dsDNA,Myoviridae,T4virus	0.9896783848620048,0.9899952238109575,0.9810420925606538	Bacteria,Pseudomonadaceae,Pseudomonas	0.9943644184853389,0.9912886285929294,0.9920908757723161
ERR3687822_contig-140_41_self_circular	ERR3687822_contig-140_41_self_circular	1	82390	circular	Lake_Rotsee	1	dsDNA,Myoviridae,P12002virus	0.9822251305965967,0.9876717575902786,0.9887095618825111	Bacteria,Enterobacteriaceae,Bacillus	0.9870918347211808,0.9938979501693196,0.9939125550570034
SRR6754100_NODE_266_length_82226_cov_6.113156_self_circular	SRR6754100_NODE_266_length_82226_cov_6.113156_self_circular	1	82099	circular	Rimov	1	dsDNA,Podoviridae,Cba41virus	0.9861276147344349,0.9933369798406991,0.9945173323929227	Bacteria,Flavobacteriaceae,Cellulophaga	0.9917518449820435,0.9970348618450112,0.9973824203611696
SRR6754089_k141_951002_extended_circular	SRR6754089_k141_951002_extended_circular	1	81947	circular	Rimov	1	dsDNA,Myoviridae,T4virus	0.9890982669327175,0.9915336926246499,0.9877425185005593	Bacteria,Enterobacteriaceae,Bacillus	0.9933541181577805,0.9946463919380961,0.9945696607989799
ERS4600478_contig-140_35_self_circular	ERS4600478_contig-140_35_self_circular	1	81767	circular	Loclat	1	dsDNA,Myoviridae,P1virus	0.9811910073313455,0.9812183853328437,0.9858194521740568	Bacteria,Enterobacteriaceae,Escherichia	0.9903753107857453,0.9919041503754479,0.9926829215398395
SRR6754096_k141_1819966_extended_partial	SRR6754096_k141_1819966_extended_partial	1	81730	high-quality	Rimov	1	dsDNA,Podoviridae,Cba41virus	0.9966748312893752,0.9979807596820287,0.9980989745482998	Bacteria,Flavobacteriaceae,Cellulophaga	0.9976605233039978,0.9985930930685295,0.9986749451869715
SRR4198832_contig-140_7911_extended_partial	SRR4198832_contig-140_7911_extended_partial	1	81561	high-quality	Tous	1	dsDNA,Myoviridae,T4virus	0.9781909288612873,0.9669623280059647,0.9811164805131115	Bacteria,Synechococcaceae,Synechococcus	0.9876474999013378,0.9952373746462283,0.9955086930969198
ERS4600484_contig-140_69_self_circular	ERS4600484_contig-140_69_self_circular	1	81533	circular	Loclat	1	dsDNA,Siphoviridae,L5virus	0.9979709884985315,0.9983464612852835,0.9869049652580711	Bacteria,Mycobacteriaceae,Mycobacterium	0.9983045897628162,0.998290444484434,0.9984428979447554
SRR9302958_k141_424765_extended_partial	SRR9302958_k141_424765_extended_partial	1	81523	high-quality	Lugu	1	dsDNA,Myoviridae,Cba41virus	0.987221991794274,0.9915526082248182,0.9913957934990439	Bacteria,Flavobacteriaceae,Synechococcus	0.9926153360432535,0.9961821290100937,0.9963371234382895
SRR6754101_k141_1866968_self_circular	SRR6754101_k141_1866968_self_circular	1	81436	circular	Rimov	1	dsDNA,Myoviridae,Nit1virus	0.9881776450014573,0.989702032008348,0.9849846540409188	Bacteria,Bacillaceae,Bacillus	0.9934709341331545,0.9920779688190161,0.9921732850732901
SRR8894379_k141_1186462_extended_partial	SRR8894379_k141_1186462_extended_partial	1	81426	high-quality	Fuxian	1	dsDNA,Myoviridae,Phicbkvirus	0.8490123982691747,0.8723086647635471,0.9358803400906982	Bacteria,Enterobacteriaceae,Pseudomonas	0.904292987094992,0.9176039229800252,0.9238451312368118
SRR6475631_k141_7008505_self_circular	SRR6475631_k141_7008505_self_circular	1	80748	circular	Zurich	1	dsDNA,Siphoviridae,Bxz1virus	0.9443212900477547,0.9431570451940977,0.9591940754128532	Bacteria,Mycobacteriaceae,Mycobacterium	0.9592770038280911,0.945408739182358,0.9511594771780453
SRR9214418_k141_702439_extended_circular	SRR9214418_k141_702439_extended_circular	1	80361	circular	Jiricka_pond	1	dsDNA,Myoviridae,Nit1virus	0.9938218841781943,0.9940210940467877,0.993475901058513	Bacteria,Flavobacteriaceae,Synechococcus	0.9963455542839101,0.9969796489276425,0.9973151917209014
ERS4600322_contig-140_31_self_circular	ERS4600322_contig-140_31_self_circular	1	80318	circular	Alinen_Mustajärvi	1	dsDNA,Myoviridae,P12024virus	0.9539016433872161,0.9702804395354959,0.9796039254798022	Bacteria,Synechococcaceae,Synechococcus	0.969613639054422,0.9788861714136142,0.9809851381331691
ERR2814753_NODE_49_length_80412_cov_16.691399_self_circular	ERR2814753_NODE_49_length_80412_cov_16.691399_self_circular	1	80285	circular	Soyang	1	dsDNA,Myoviridae,T4virus	0.9853667354213842,0.9870475427847232,0.9898584424815821	Bacteria,Synechococcaceae,Synechococcus	0.9921638580843759,0.9965277209743648,0.9967903745936463
ERS4600340_contig-140_185_extended_circular	ERS4600331_contig-140_65_extended_partial,ERS4600340_contig-140_185_extended_circular,ERS4600333_contig-140_369_extended_circular	3	80251	circular	Alinen_Mustajärvi	1	dsDNA,Siphoviridae,Phic31virus	0.9938821379727821,0.9959599430640435,0.9957213151789994	Bacteria,Mycobacteriaceae,Mycobacterium	0.9962808319191759,0.9976790125476467,0.9979397674756513
SRR9214418_k141_690434	SRR9214418_k141_690434	1	80232	high-quality	Jiricka_pond	1	dsDNA,Siphoviridae,Lambdavirus	0.9981601573885165,0.9983937502857044,0.9982119340316618	Bacteria,Enterobacteriaceae,Escherichia	0.9983614191562413,0.9988630228867768,0.9988853057710366
SRR5896114_k141_1660876_extended_circular	SRR5896114_k141_1660876_extended_circular	1	80071	circular	Baikal	1	dsDNA,Myoviridae,T4virus	0.9854732305001905,0.9840998617584887,0.9878306819997685	Bacteria,Synechococcaceae,Synechococcus	0.9917913098385888,0.9914931208794804,0.9923749709940948
ERS4600332_contig-140_23_self_circular	ERS4600331_contig-140_383_extended_circular,ERS4600334_contig-140_972_extended_circular,ERS4600332_contig-140_23_self_circular,ERS4600337_contig-140_123_self_circular,ERS4600335_contig-140_88_self_circular,ERS4600333_contig-140_141_self_circular	6	79874	circular	Alinen_Mustajärvi	1	dsDNA,Myoviridae,Cba41virus	0.8982411496984508,0.9285147943637817,0.963684903653826	Bacteria,Bacillaceae,Bacillus	0.9257634476498678,0.9705163021250839,0.9738372156065866
ERS4600552_contig-140_608_self_circular	ERS4600517_contig-140_1229_extended_partial,ERS4600523_contig-140_1899_extended_partial,ERS4600552_contig-140_608_self_circular,ERS4600534_contig-140_1659_extended_partial,ERS4600538_contig-140_1771_extended_circular	5	13087	circular	Mekkojärvi	1	dsDNA,Siphoviridae,T4virus	0.9304376947738942,0.9716691598478555,0.9811743378094676	Bacteria,Bacillaceae,Bacillus	0.959992107028691,0.9879983477023246,0.9887055884349389
ERR2814725_NODE_280_length_21145_cov_13.933819_extended_partial	ERR2814725_NODE_280_length_21145_cov_13.933819_extended_partial	1	79241	high-quality	Soyang	1	dsDNA,Myoviridae,T4virus	0.9781587000874381,0.9776827444013765,0.9842986318126966	Bacteria,Synechococcaceae,Synechococcus	0.9865409053238091,0.994754772849968,0.9950467672783028
SRR9302962_k141_2079009_extended_partial	SRR9302962_k141_2079009_extended_partial	1	79070	high-quality	Erhai	1	dsDNA,Myoviridae,Se1virus	0.9906620630899267,0.9874353125881743,0.9874973137683835	Bacteria,Enterobacteriaceae,Bacillus	0.9949926990015391,0.9934603366761006,0.9882089639632802
ERS4600507_contig-140_83_self_circular	ERS4600507_contig-140_83_self_circular,ERS4600505_contig-140_112_self_circular,ERS4600508_contig-140_52_self_circular	3	79041	circular	Mekkojärvi	1	dsDNA,Myoviridae,P1virus	0.9948588099455193,0.9966629728703005,0.9960849896132378	Bacteria,Enterobacteriaceae,Escherichia	0.9970069852796085,0.9975624519443127,0.9977966355318545
ERR3687826_contig-140_49_self_circular	ERR3687826_contig-140_49_self_circular,ERR3687829_contig-140_56_self_circular	2	78805	circular	Lake_Rotsee	1	dsDNA,Myoviridae,T4virus	0.9901590139676704,0.9922414513309489,0.9902551782280239	Bacteria,Bacillaceae,Synechococcus	0.99432179644027,0.9952414644919594,0.9957147163493547
SRR6754087_k141_2379604_extended_partial	SRR6754087_k141_2379604_extended_partial	1	78783	high-quality	Rimov	1	dsDNA,Podoviridae,Cba41virus	0.9916849763468825,0.9958716702632578,0.9964321333913743	Bacteria,Flavobacteriaceae,Cellulophaga	0.9952137021981925,0.9977076414677638,0.997976634794508
SRR6754086_k141_1410197_extended_circular	SRR6754088_k141_810899_extended_partial,SRR6754086_k141_1410197_extended_circular	2	78228	circular	Rimov	1	dsDNA,Siphoviridae,T4virus	0.9929461022801157,0.9910418870202728,0.9895002782660444	Bacteria,Enterobacteriaceae,Pseudomonas	0.9960945577962824,0.9954377770870483,0.9959337515966802
ERR2814725_NODE_286_length_20938_cov_122.892172_extended_partial	ERR2814725_NODE_286_length_20938_cov_122.892172_extended_partial	1	78638	high-quality	Soyang	1	dsDNA,Myoviridae,T4virus	0.990656458085779,0.99186629192761,0.9926962051123809	Bacteria,Synechococcaceae,Synechococcus	0.9943012747148664,0.996785381255419,0.9969638678588546
ERR2814750_NODE_116_length_36140_cov_73.024658_extended_partial	ERR2814750_NODE_116_length_36140_cov_73.024658_extended_partial	1	78484	high-quality	Soyang	1	dsDNA,Myoviridae,T4virus	0.9896685761047463,0.9900913781118132,0.9913985486083943	Bacteria,Synechococcaceae,Synechococcus	0.9936777299814515,0.9961555450128421,0.9963110994485083
ERS4600569_NODE_538_length_42083_cov_13.179283_extended_circular	ERS4600569_NODE_538_length_42083_cov_13.179283_extended_circular	1	78460	circular	Björntjärnan	1	dsDNA,Siphoviridae,Lambdavirus	0.9897190211420757,0.9924274547326043,0.9933161047161961	Bacteria,Enterobacteriaceae,Escherichia	0.993532499309365,0.9966994944950677,0.9968836272236957
ERS4600387_contig-140_15_self_circular	ERS4600387_contig-140_15_self_circular	1	78431	circular	SAS2	1	dsDNA,Podoviridae,Bcep22virus	0.9862369123153151,0.9869624225839656,0.9833095475559425	Bacteria,Pseudomonadaceae,Pseudomonas	0.9915797782075062,0.9885238928787606,0.9897335360312982
ERS4600334_contig-140_138_self_circular	ERS4600334_contig-140_138_self_circular	1	78308	circular	Alinen_Mustajärvi	1	dsDNA,Siphoviridae,Chlorovirus	0.9042525166468623,0.9055843580597008,0.9434706663507475	Bacteria,Bacillaceae,Bacillus	0.9347551205651368,0.9420980090630982,0.951987907519415
ERS4600385_contig-140_31_self_circular	ERS4600385_contig-140_31_self_circular	1	78171	circular	SAS2	1	dsDNA,Myoviridae,Bxz1virus	0.9935360289666615,0.9951434196567764,0.9952584568081507	Bacteria,Mycobacteriaceae,Mycobacterium	0.9952326453293342,0.9975747214815057,0.9978183221900054
SRR8894378_k141_2979996_self_circular	SRR8894378_k141_2979996_self_circular	1	78010	circular	Fuxian	1	dsDNA,Podoviridae,Cba41virus	0.9821858955675628,0.9882234625951888,0.9901973209316678	Bacteria,Flavobacteriaceae,Cellulophaga	0.9891455858557954,0.995809953048571,0.9961029075302583
SRR6754087_k141_3517591_self_circular	SRR6754087_k141_3517591_self_circular	1	77995	circular	Rimov	1	dsDNA,Siphoviridae,Lambdavirus	0.9422236172454768,0.9552898264020795,0.9729613568362528	Bacteria,Mycobacteriaceae,Mycobacterium	0.9659670863096412,0.9803666955682432,0.9793673134351016
SRR9214414_k141_761202_extended_circular	SRR9214414_k141_761202_extended_circular	1	77954	circular	Jiricka_pond	1	dsDNA,Siphoviridae,Bxz1virus	0.9849996076497096,0.9844655633617435,0.9862712901075044	Bacteria,Mycobacteriaceae,Mycobacterium	0.9896460002367892,0.9923131349485498,0.9930602693916676
SRR9302957_k141_974993_extended_circular	SRR9302957_k141_974993_extended_circular	1	77915	circular	Lugu	1	dsDNA,Myoviridae,T4virus	0.9849421563571957,0.9750266788777374,0.9844942445765672	Bacteria,Synechococcaceae,Synechococcus	0.9919018114369155,0.9945216516433,0.9949014666686907
ERS4600464_contig-140_949_extended_circular	ERS4600464_contig-140_949_extended_circular	1	77908	circular	Loclat	1	dsDNA,Siphoviridae,T4virus	0.9967813263681815,0.9911664147213811,0.9913462015307387	Bacteria,Synechococcaceae,Synechococcus	0.9976384229843325,0.9978282919168289,0.9980091647817346
ERS4600486_contig-140_752_extended_circular	ERS4600486_contig-140_752_extended_circular	1	77885	circular	Loclat	1	dsDNA,Podoviridae,Cba41virus	0.9787192005022084,0.9884299578970266,0.9912855891250324	Bacteria,Flavobacteriaceae,Cellulophaga	0.9878606101266821,0.9955359333845928,0.9956756803646828
ERR2814751_NODE_16_length_77289_cov_25.536430_extended_circular	ERR2814751_NODE_16_length_77289_cov_25.536430_extended_circular,ERR2814750_NODE_7_length_73349_cov_68.962648_extended_partial,SRR9302957_k141_818398_extended_partial	3	77870	circular	Soyang,Lugu	2	dsDNA,Myoviridae,T4virus	0.9844699347577517,0.9821389445410366,0.9875386404086378	Bacteria,Synechococcaceae,Synechococcus	0.9911535577568176,0.9939265790894367,0.9943918302021414
SRR9302965_k141_1852095_self_circular	SRR9302965_k141_1852095_self_circular	1	77694	circular	Dianchi	1	dsDNA,Siphoviridae,P12002virus	0.9773459744860211,0.9899274429103543,0.9901394636353117	Bacteria,Flavobacteriaceae,Bacillus	0.987256008524409,0.9940594990756949,0.9943961675337716
ERS4600468_contig-140_49_self_circular	ERS4600468_contig-140_49_self_circular	1	77483	circular	Loclat	1	dsDNA,Siphoviridae,P12024virus	0.9959461807501737,0.9914123175235696,0.9922967142565888	Bacteria,Synechococcaceae,Synechococcus	0.997434784324559,0.9975869910186987,0.9978638641721227
SRR6754086_k141_2956790_extended_circular	SRR6754086_k141_2956790_extended_circular,SRR6754088_k141_1772791_extended_circular	2	77408	circular	Rimov	1	dsDNA,Podoviridae,Cba41virus	0.9810046409434343,0.9911002101207919,0.9918558967605424	Bacteria,Flavobacteriaceae,Cellulophaga	0.9901448360235211,0.9964786428255926,0.9965583273514301
SRR9302958_k141_173305_extended_partial	SRR9302958_k141_173305_extended_partial	1	77289	high-quality	Lugu	1	dsDNA,Myoviridae,T4virus	0.9858711857946775,0.9875220090889458,0.9898667078096329	Bacteria,Synechococcaceae,Synechococcus	0.9918939184656064,0.9954050583212001,0.9958404989666307
SRR6754086_k141_2173408_extended_partial	SRR6754086_k141_2173408_extended_partial	1	77152	high-quality	Rimov	1	dsDNA,Siphoviridae,P12024virus	0.9864583099791494,0.9901102937119816,0.9903075253056793	Bacteria,Flavobacteriaceae,Cellulophaga	0.9909878053593275,0.9963068693048899,0.9965084480376828
ERS4600337_contig-140_2393_extended_circular	ERS4600337_contig-140_2393_extended_circular,ERS4600334_contig-140_1515_extended_circular	2	77007	circular	Alinen_Mustajärvi	1	dsDNA,Siphoviridae,Phicbkvirus	0.9702976817702845,0.9697003611303332,0.9765209581168277	Bacteria,Synechococcaceae,Synechococcus	0.9807269426575634,0.9821437335383709,0.9841231975676245
SRR8894382_k141_1678772_extended_partial	SRR8894382_k141_1678772_extended_partial	1	76631	circular	Fuxian	1	dsDNA,Podoviridae,P22virus	0.9623063471066968,0.962041119362166,0.9676247100247409	Bacteria,Synechococcaceae,Synechococcus	0.9780954260231264,0.9756776874376298,0.9748825125294668
SRR9302958_k141_684343_extended_partial	SRR9302958_k141_684343_extended_partial	1	76546	high-quality	Lugu	1	dsDNA,Myoviridae,T4virus	0.9876717933771271,0.988020119893379,0.9904645665386459	Bacteria,Synechococcaceae,Synechococcus	0.9926563794940605,0.994846794378916,0.9953395371633418
ERS4600472_contig-140_641_extended_partial	ERS4600472_contig-140_641_extended_partial,ERS4600470_contig-140_285_extended_partial	2	76467	high-quality	Loclat	1	dsDNA,Myoviridae,T4virus	0.99561968925857,0.9941298587477557,0.9931700839206308	Bacteria,Enterobacteriaceae,Synechococcus	0.9970101424681321,0.9971207486053626,0.9972631437413388
SRR6754103_k141_963517_self_circular	SRR6754103_k141_963517_self_circular	1	76287	circular	Rimov	1	dsDNA,Siphoviridae,T4virus	0.9951881039391969,0.9899353244104244,0.9905361993817534	Bacteria,Synechococcaceae,Synechococcus	0.9969485772919215,0.9970553110736663,0.9973780830295393
SRR8894380_k141_2078700_self_circular	SRR8894380_k141_2078700_self_circular	1	76281	circular	Fuxian	1	dsDNA,Siphoviridae,T4virus	0.9927653408963523,0.9657785266954289,0.9790225974068911	Bacteria,Synechococcaceae,Synechococcus	0.9952515884604759,0.9955563826132479,0.9958621856247818
ERR2814750_NODE_9_length_70893_cov_94.553147_extended_circular	ERR2814750_NODE_9_length_70893_cov_94.553147_extended_circular	1	76232	circular	Soyang	1	dsDNA,Siphoviridae,Cba41virus	0.989447178440912,0.9923707079320992,0.9927099806591324	Bacteria,Flavobacteriaceae,Cellulophaga	0.9933067603299262,0.9968508187871153,0.9971286864608024
SRR9302958_k141_1288356_self_circular	SRR9302958_k141_1288356_self_circular	1	75900	circular	Lugu	1	dsDNA,Myoviridae,T4virus	0.9277809228078828,0.9271481422516185,0.9475702690639791	Bacteria,Hominidae,Homo	0.9372224633963455,0.9599338262960722,0.9638787021836296
SRR12053438_k141_1189127	SRR12053438_k141_1189127	1	75789	high-quality	Baikal	1	dsDNA,Podoviridae,Vp5virus	0.9319762684124386,0.9533888085851604,0.9300918553457387	Bacteria,Burkholderiaceae,Vibrio	0.9533967402028494,0.9306219019418588,0.9378373630758621
SRR5896115_k141_1620072_extended_partial	SRR5896115_k141_1620072_extended_partial	1	75762	high-quality	Baikal	1	dsDNA,Myoviridae,T4virus	0.9850850839629621,0.9871941386860278,0.9897069114673162	Bacteria,Synechococcaceae,Synechococcus	0.9917455306049963,0.9964684182112651,0.9967795312645708
SRR5896115_k141_673911_extended_partial	SRR5896115_k141_673911_extended_partial	1	75718	high-quality	Baikal	1	dsDNA,Podoviridae,Bpp1virus	0.9979527722350514,0.9984457681861674,0.9983882610300803	Bacteria,Flavobacteriaceae,Cellulophaga	0.9983503689964087,0.9990082124102279,0.9990327750464637
ERS4600323_contig-140_82	ERS4600323_contig-140_82	1	75636	high-quality	Alinen_Mustajärvi	1	dsDNA,Podoviridae,Vp5virus	0.8481828576553146,0.9383792798515755,0.9338443142808338	Bacteria,Vibrionaceae,Bacillus	0.9023450017759186,0.9414538583604627,0.9507864666578474
ERS4600500_contig-140_58_self_circular	ERS4600500_contig-140_58_self_circular,ERS4600503_contig-140_66_self_circular,ERS4600502_contig-140_86_self_circular,ERS4600501_contig-140_93_self_circular	4	75572	circular	Loclat	1	dsDNA,Siphoviridae,Che8virus	0.8624517969643297,0.8715961771572059,0.9117896639317614	Bacteria,Mycobacteriaceae,Mycobacterium	0.900141284186432,0.8880343383447576,0.884687701279296
ERS4600401_contig-140_996_extended_partial	ERS4600401_contig-140_996_extended_partial	1	75538	circular	SAS2	1	dsDNA,Myoviridae,Luz24virus	0.8120810259399592,0.8038389210541664,0.7999322243099829	Bacteria,Bacillaceae,Bacillus	0.8570661825644263,0.8443915945490537,0.8288814238592276
SRR4198832_contig-140_570_extended_circular	SRR4198832_contig-140_570_extended_circular,SRR4198666_contig-140_765_extended_partial	2	75525	circular	Tous	1	dsDNA,Siphoviridae,P12024virus	0.9947284935990852,0.9782675517065812,0.9810586232167555	Bacteria,Synechococcaceae,Synechococcus	0.996678637673152,0.9962966446905622,0.9964477253948598
ERS4600333_contig-140_156_self_circular	ERS4600333_contig-140_156_self_circular,ERS4600331_contig-140_55	2	75520	circular	Alinen_Mustajärvi	1	dsDNA,Myoviridae,Vegasvirus	0.9763314687352869,0.9743662091718592,0.9786974945035568	Bacteria,Bacillaceae,Bacillus	0.9865551126721654,0.977219559278224,0.9810827280948488
SRR8894380_k141_829599_self_circular	SRR8894380_k141_829599_self_circular	1	75518	circular	Fuxian	1	dsDNA,Siphoviridae,Nit1virus	0.9668295854538932,0.9671703996078166,0.9792540265923154	Bacteria,Mycobacteriaceae,Mycobacterium	0.980016575239749,0.9854319695061102,0.9858863228753039
SRR6754094_k141_4613179_self_circular	SRR6754094_k141_4613179_self_circular	1	75478	circular	Rimov	1	dsDNA,Siphoviridae,Cba41virus	0.9818692128332175,0.9847997389647177,0.9868498630710653	Bacteria,Flavobacteriaceae,Cellulophaga	0.9890792848967994,0.9935973465080897,0.9936783391489722
SRR6754099_k141_615493	SRR6754099_k141_615493	1	75444	high-quality	Rimov	1	dsDNA,Podoviridae,Bcep22virus	0.997131639127413,0.9975315141780304,0.9737823794226392	Bacteria,Pseudomonadaceae,Pseudomonas	0.9979209913571964,0.9906138040473114,0.9913687100558866
ERS4600462_contig-140_94_self_circular	ERS4600462_contig-140_94_self_circular	1	75132	circular	Loclat	1	dsDNA,Myoviridae,Cba41virus	0.9822111180862274,0.9838602641563563,0.9860453711407806	Bacteria,Bacillaceae,Bacillus	0.9899254114211294,0.9883562092037889,0.9898181139980873
SRR8894379_k141_1483003_extended_circular	SRR8894379_k141_1483003_extended_circular	1	75132	circular	Fuxian	1	dsDNA,Podoviridae,T4virus	0.9965431136919042,0.9971973385750563,0.9759561607000182	Bacteria,Pseudomonadaceae,Pseudomonas	0.9975879079679545,0.9796980057912216,0.9828285040760074
SRR12053438_k141_1989917_self_circular	SRR12053438_k141_1989917_self_circular,SRR12053439_k141_2020265_self_circular,SRR12053440_k141_2024591_self_circular	3	74977	circular	Baikal	1	dsDNA,Podoviridae,Schizot4virus	0.9943151245431922,0.9949652977551912,0.9661865429438894	Bacteria,Vibrionaceae,Vibrio	0.9967670389518134,0.9696267606785872,0.9711827686488995
SRR9302961_k141_776806_extended_partial	SRR9302961_k141_776806_extended_partial	1	74945	circular	Erhai	1	dsDNA,Siphoviridae,Nit1virus	0.986333598636863,0.9863476655784942,0.9829982201993597	Bacteria,Bacillaceae,Bacillus	0.9917944670271124,0.9921679454250986,0.9931687026824227
SRR9302966_k141_1806119_extended_circular	SRR9302966_k141_1806119_extended_circular	1	74792	circular	Dianchi	1	dsDNA,Podoviridae,Cba41virus	0.9829790036544627,0.989697303108306,0.9898446669348306	Bacteria,Flavobacteriaceae,Cellulophaga	0.9909293973716405,0.9947322786984475,0.9953070071761152
ERS4600502_contig-140_89_self_circular	ERS4600502_contig-140_89_self_circular,ERS4600496_contig-140_401_extended_partial	2	74673	circular	Loclat	1	dsDNA,Siphoviridae,Phicbkvirus	0.9665016927112526,0.9827663119466202,0.9862768003262049	Bacteria,Bacillaceae,Bacillus	0.980714313903469,0.9913540661246257,0.9920626831167197
ERS4600461_contig-140_1479_extended_circular	ERS4600461_contig-140_1479_extended_circular,ERS4600460_contig-140_246_extended_partial	2	74522	circular	Loclat	1	dsDNA,Myoviridae,Nit1virus	0.9816730376880479,0.9874636859884268,0.9897565034356214	Bacteria,Synechococcaceae,Synechococcus	0.9905110698922609,0.9944705285716623,0.9949621893115137
ERS4600489_contig-140_79_self_circular	ERS4600489_contig-140_79_self_circular,ERS4600490_contig-140_73_self_circular	2	74472	circular	Loclat	1	dsDNA,Podoviridae,Cba41virus	0.9740796583189472,0.9740146942687308,0.9740964618885724	Bacteria,Pseudomonadaceae,Pseudomonas	0.9846450136153755,0.9892866491075957,0.9900870285591601
ERS4600480_contig-140_61_self_circular	ERS4600480_contig-140_61_self_circular,ERS4600483_contig-140_62_self_circular,ERS4600481_contig-140_55_self_circular	3	74457	circular	Loclat	1	dsDNA,Myoviridae,T4virus	0.9518824406430061,0.9782959251068337,0.9808519900154837	Bacteria,Mycobacteriaceae,Synechococcus	0.9713958719760054,0.9894338835539124,0.9898116080006419
ERS4600458_contig-140_226_extended_partial	ERS4600458_contig-140_226_extended_partial	1	74304	high-quality	Lovojärvi	1	dsDNA,Siphoviridae,Chlorovirus	0.32192621572539964,0.5909548752594984,0.7537235302869171	Bacteria,Haloarculaceae,Haloarcula	0.42998224081455466,0.6807650465424444,0.6945130586212056
SRR9214416_k141_372361_extended_partial	SRR9214416_k141_372361_extended_partial	1	74166	high-quality	Jiricka_pond	1	dsDNA,Siphoviridae,Lambdavirus	0.9972269241979239,0.997397528676838,0.9975231566940892	Bacteria,Enterobacteriaceae,Escherichia	0.9979920280989779,0.9984151847792301,0.9985448252380653
ERS4600501_contig-140_97_self_circular	ERS4600501_contig-140_97_self_circular	1	73957	circular	Loclat	1	dsDNA,Podoviridae,Bpp1virus	0.9851271214940699,0.9877316569908118,0.9884340509474822	Bacteria,Flavobacteriaceae,Cellulophaga	0.988700422273965,0.9961330508613215,0.996118088190964
ERS4600489_contig-140_233_extended_partial	ERS4600489_contig-140_233_extended_partial	1	73906	high-quality	Loclat	1	dsDNA,Siphoviridae,Phifelvirus	0.9888586530054032,0.9938902611456233,0.9910844661424612	Bacteria,Flavobacteriaceae,Cellulophaga	0.9940692213583804,0.9964745529798616,0.9967708566013103
ERS4600470_contig-140_2394_extended_partial	ERS4600470_contig-140_2394_extended_partial	1	73904	high-quality	Loclat	1	dsDNA,Podoviridae,P22virus	0.9675428222316884,0.974728758175086,0.9768543263482128	Bacteria,Synechococcaceae,Synechococcus	0.9794293381743557,0.9832704860372666,0.9840581375931713
SRR6754102_k141_936065_extended_circular	SRR6754102_k141_936065_extended_circular,SRR6754100_NODE_3038_length_22910_cov_2.877233_extended_partial	2	73612	circular	Rimov	1	dsDNA,Myoviridae,T4virus	0.9824311144990248,0.9571009951181989,0.9660432772576744	Bacteria,Bacillaceae,Bacillus	0.9862946446189668,0.9695592782240254,0.972217222242704
ERS4600325_contig-140_224_self_circular	ERS4600325_contig-140_224_self_circular	1	73509	circular	Alinen_Mustajärvi	1	dsDNA,Siphoviridae,Bpp1virus	0.9808182745555232,0.9789800393129223,0.9834693438982594	Bacteria,Flavobacteriaceae,Cellulophaga	0.9879663759422235,0.9938938603235886,0.9943961675337716
SRR9302960_k141_183477_self_circular	SRR9302960_k141_183477_self_circular	1	73395	circular	Fuxian	1	dsDNA,Siphoviridae,P12024virus	0.995904143219066,0.9922934692314119,0.9933464109190494	Bacteria,Synechococcaceae,Synechococcus	0.997384269308181,0.9975706316357748,0.9978443461797867
ERS4600485_contig-140_1316_extended_circular	ERS4600485_contig-140_1316_extended_circular	1	73347	circular	Loclat	1	dsDNA,Siphoviridae,T4virus	0.9729054099500034,0.962372142365112,0.9772345314385528	Bacteria,Synechococcaceae,Synechococcus	0.9851217490824421,0.9826549642547483,0.9844853647587468
SRR6754089_k141_2497182_self_circular	SRR6754089_k141_2497182_self_circular	1	73323	circular	Rimov	1	dsDNA,Myoviridae,Phicbkvirus	0.7465291011815349,0.8601979517557617,0.8606520792810267	Bacteria,Bacillaceae,Bacillus	0.8160037886262284,0.8144068905720876,0.8339517645349405
SRR6754099_k141_1225181_extended_circular	SRR6754099_k141_1225181_extended_circular	1	73187	circular	Rimov	1	dsDNA,Siphoviridae,Nit1virus	0.9692033047104455,0.975761234684275,0.9827612807952347	Bacteria,Flavobacteriaceae,Cellulophaga	0.983835194759067,0.9901393819425132,0.9912147347830141
SRR6754087_k141_2618789_self_circular	SRR6754087_k141_2618789_self_circular	1	73113	circular	Rimov	1	dsDNA,Podoviridae,Bpp1virus	0.9885489765262426,0.9858322154739068,0.9898391567161301	Bacteria,Flavobacteriaceae,Cellulophaga	0.993830853624847,0.9970409966136078,0.9972696497387842
SRR9302957_k141_1498830_self_circular	SRR9302957_k141_1498830_self_circular	1	73102	circular	Lugu	1	dsDNA,Myoviridae,T4virus	0.9844152859673116,0.9895633176071136,0.9911946705164728	Bacteria,Synechococcaceae,Synechococcus	0.9914313903468961,0.9948672436075712,0.9953612238214927
SRR6754101_k141_1255372_extended_partial	SRR6754101_k141_1255372_extended_partial,SRR6754095_k141_1714051_extended_partial	2	72631	high-quality	Rimov	1	dsDNA,Myoviridae,T4virus	0.9792600834024617,0.9851055411674393,0.987739763391209	Bacteria,Synechococcaceae,Synechococcus	0.9876664430324795,0.9933233268441114,0.9935438818684357
ERR3687830_contig-140_1005_extended_partial	ERR3687830_contig-140_1005_extended_partial,ERR3687829_contig-140_2003_extended_partial	2	72612	high-quality	Lake_Rotsee	1	dsDNA,Podoviridae,Cba41virus	0.9878357397484474,0.9941976396483589,0.9942528418952948	Bacteria,Flavobacteriaceae,Cellulophaga	0.9930005130431351,0.9972700279745448,0.9975906122794196
SRR9302965_k141_1749400_self_circular	SRR9302965_k141_1749400_self_circular	1	72567	circular	Dianchi	1	dsDNA,Siphoviridae,Bpp1virus	0.9838085442683228,0.9904523508150259,0.991015588408704	Bacteria,Flavobacteriaceae,Cellulophaga	0.9912230159043371,0.9962087130073454,0.9962937501219874
SRR6754087_k141_2823212_extended_partial	SRR6754087_k141_2823212_extended_partial	1	72479	high-quality	Rimov	1	dsDNA,Siphoviridae,Cba41virus	0.9845245835481918,0.990457079715068,0.9903185457430805	Bacteria,Flavobacteriaceae,Cellulophaga	0.9915860925845534,0.9957547401312022,0.9958209809742948
ERS4600539_contig-140_75_self_circular	ERS4600539_contig-140_75_self_circular	1	72388	circular	Mekkojärvi	1	dsDNA,Podoviridae,Bpp1virus	0.9882308925408605,0.9927206465352137,0.993076410202721	Bacteria,Flavobacteriaceae,Cellulophaga	0.9934504124077509,0.9966279221947748,0.9969009765502166
SRR6754101_k141_3047344_extended_partial	SRR6754101_k141_3047344_extended_partial	1	72121	high-quality	Rimov	1	dsDNA,Siphoviridae,Bpp1virus	0.9894177521691366,0.9929318707370937,0.9914123241551457	Bacteria,Flavobacteriaceae,Cellulophaga	0.9931552152807924,0.9971493775254797,0.9974865163202946
SRR12053441_k141_651682_self_circular	SRR12053441_k141_651682_self_circular	1	72106	circular	Baikal	1	dsDNA,Siphoviridae,C5virus	0.9515965854314732,0.9547302398970992,0.9697792055366677	Bacteria,Enterobacteriaceae,Bacillus	0.9710691029638108,0.9430161794297119,0.9525864592843837
ERS4600500_contig-140_70_self_circular	ERS4600500_contig-140_70_self_circular	1	72028	circular	Loclat	1	dsDNA,Siphoviridae,Cba41virus	0.9775911934174831,0.9675329486110432,0.9772868785162083	Bacteria,Mycobacteriaceae,Mycobacterium	0.98706499861873,0.9840373321118328,0.9857670462554732
SRR9302966_k141_2001483_extended_circular	SRR9302966_k141_2001483_extended_circular	1	72009	circular	Dianchi	1	dsDNA,Podoviridae,T4virus	0.980123254041208,0.9863066817781294,0.9886434392581042	Bacteria,Flavobacteriaceae,Cellulophaga	0.9892876593393582,0.9952107906489768,0.9956431503774563
ERS4600549_contig-140_92	ERS4600549_contig-140_92	1	71956	circular	Mekkojärvi	1	dsDNA,Podoviridae,Bpp1virus	0.9893028495841087,0.9906288964165971,0.9910128332993536	Bacteria,Flavobacteriaceae,Cellulophaga	0.9935482852519831,0.9969489750846598,0.9972609750755238
SRR9214414_k141_78739_extended_partial	SRR9214414_k141_78739_extended_partial	1	71920	high-quality	Jiricka_pond	1	dsDNA,Podoviridae,Bpp1virus	0.9822111180862274,0.9878577609919341,0.9906684446305674	Bacteria,Flavobacteriaceae,Cellulophaga	0.9873033663522633,0.9957404256711437,0.9960074862343937
ERS4600494_contig-140_108	ERS4600494_contig-140_108	1	71874	high-quality	Loclat	1	dsDNA,Siphoviridae,T4virus	0.9120224536466157,0.9273120774530775,0.9525818129721568	Bacteria,Flavobacteriaceae,Synechococcus	0.9442266861359959,0.9564083792759337,0.9625991893527183
ERS4600456_contig-140_106_extended_circular	ERS4600459_contig-140_1319_extended_partial,ERS4600456_contig-140_106_extended_circular	2	71281	circular	Lovojärvi	1	dsDNA,Siphoviridae,Lambdavirus	0.9958565006838105,0.9969151808725452,0.9967186647638044	Bacteria,Enterobacteriaceae,Escherichia	0.9974379415130826,0.997865100528408,0.9980677187587425
ERS4600467_contig-140_133_self_circular	ERS4600467_contig-140_133_self_circular,ERS4600472_contig-140_98_self_circular,ERS4600469_contig-140_74_self_circular,ERS4600468_contig-140_56_self_circular	4	71445	circular	Loclat	1	dsDNA,Podoviridae,N4virus	0.997168071654373,0.9974243257770765,0.9888996644276812	Bacteria,Pseudomonadaceae,Pseudomonas	0.997883105094913,0.9883296252065372,0.9890525749653556
ERS4600569_NODE_1095_length_25230_cov_57.531450_extended_circular	ERS4600569_NODE_1095_length_25230_cov_57.531450_extended_circular	1	71363	circular	Björntjärnan	1	dsDNA,Siphoviridae,Phic31virus	0.9625417572809004,0.9739453370681135,0.9776119814195425	Bacteria,Enterobacteriaceae,Streptomyces	0.9781096333714827,0.9693466062460124,0.9740193835350553
SRR9302958_k141_1236698_extended_partial	SRR9302958_k141_1236698_extended_partial	1	71261	high-quality	Lugu	1	dsDNA,Siphoviridae,P12024virus	0.9950479788355043,0.9790635832136659,0.9822378100186796	Bacteria,Synechococcaceae,Synechococcus	0.9970401357591065,0.996560439740213,0.9965171227009432
ERR2814725_NODE_16_length_71237_cov_9.732401_self_circular	ERR2814725_NODE_16_length_71237_cov_9.732401_self_circular	1	71110	circular	Soyang	1	dsDNA,Podoviridae,Bpp1virus	0.9763244624801022,0.9808842097298694,0.9856844518158926	Bacteria,Flavobacteriaceae,Cellulophaga	0.9861067919018114,0.9944112258085624,0.9948060453728261
SRR9302961_k141_690139_extended_partial	SRR9302961_k141_690139_extended_partial	1	71090	high-quality	Erhai	1	dsDNA,Myoviridae,T4virus	0.8990580790529785,0.9033318253396533,0.9527333439864228	Bacteria,Enterobacteriaceae,Bacillus	0.9080168909586014,0.942173671209122,0.9454537174185069
SRR6754088_k141_3360450_self_circular	SRR6754096_k141_2110081,SRR6754097_k141_590563,SRR6754094_k141_4204746_extended_circular,SRR6754100_NODE_1527_length_33940_cov_26.438204_extended_partial,SRR6754098_k141_824869_extended_partial,SRR6754088_k141_2088610_extended_circular,SRR6754088_k141_3360450_self_circular,SRR6754098_k141_2312264_self_circular	8	37539	circular	Rimov	1	dsDNA,Podoviridae,Prtbvirus	0.997055971571419,0.996803263571549,0.9970878494167433	Bacteria,Vibrionaceae,Salinivibrio	0.9979209913571964,0.9981616143439069,0.9982932600035133
SRR7054680_k141_1836933_extended_circular	SRR7054680_k141_1836933_extended_circular	1	71065	circular	Zurich	1	dsDNA,Myoviridae,Nit1virus	0.9853303028944241,0.9870932554851299,0.9894947680473438	Bacteria,Synechococcaceae,Synechococcus	0.9920722996171909,0.9948508842246471,0.9951682125639485
ERS4600370_contig-140_4_self_circular	ERS4600370_contig-140_4_self_circular	1	71028	circular	SAS2	1	dsDNA,Myoviridae,T4virus	0.9791661995829877,0.9732612228620249,0.9764603457111213	Bacteria,Bacillaceae,Mycobacterium	0.9880042622045069,0.9824668313511215,0.9829412746983928
SRR7054680_k141_46392_extended_partial	SRR7054680_k141_46392_extended_partial,SRR6475631_k141_414349_extended_partial	2	71001	circular	Zurich	1	dsDNA,Podoviridae,T4virus	0.9753744142770666,0.9815226112355513,0.9650817440944232	Bacteria,Flavobacteriaceae,Cellulophaga	0.9854264177749714,0.9776980712287533,0.9793044221264636
ERR2814752_NODE_133_length_41118_cov_13.712669_extended_partial	ERR2814752_NODE_133_length_41118_cov_13.712669_extended_partial	1	70949	high-quality	Soyang	1	dsDNA,Siphoviridae,Lambdavirus	0.9978224558886174,0.998374834685536,0.9982753015467184	Bacteria,Enterobacteriaceae,Escherichia	0.9982588105292237,0.9986626204459568,0.9987139811716433
SRR9302964_k141_659723_extended_circular	SRR9302964_k141_659723_extended_circular	1	70918	circular	Xingyun	1	dsDNA,Podoviridae,T4virus	0.970098704123041,0.9701496066343315,0.9536921220403238	Bacteria,Burkholderiaceae,Synechococcus	0.983653656418959,0.9770784596005039,0.9802564664192942
SRR9214415_k141_60491_self_circular	SRR9214415_k141_60491_self_circular	1	70908	circular	Jiricka_pond	1	dsDNA,Siphoviridae,Cba41virus	0.9912716072909894,0.9931273319388333,0.9936356974008298	Bacteria,Flavobacteriaceae,Cellulophaga	0.994910612099925,0.9974377116495166,0.997618804935016
SRR6754088_k141_875296_extended_partial	SRR6754088_k141_875296_extended_partial	1	70885	circular	Rimov	1	dsDNA,Siphoviridae,Phicbkvirus	0.9724766271327041,0.9492116135479833,0.9464902661986654	Bacteria,Pseudomonadaceae,Pseudomonas	0.9844255890129839,0.9581608781716754,0.9643688206578431
ERS4600514_contig-140_473_extended_circular	ERS4600514_contig-140_473_extended_circular	1	70883	circular	Mekkojärvi	1	dsDNA,Myoviridae,Bxz1virus	0.9795207160953299,0.9881682920946978,0.9882990505893179	Bacteria,Enterobacteriaceae,Cronobacter	0.9887651446386992,0.9944582590344693,0.9947084554111465
SRR9302962_k141_539858_extended_partial	SRR9302962_k141_539858_extended_partial	1	70880	high-quality	Erhai	1	dsDNA,Siphoviridae,T4virus	0.986409266192857,0.9744402952725186,0.9823810757048947	Bacteria,Synechococcaceae,Synechococcus	0.9919144401910099,0.9930390825658056,0.99352870120773
SRR6754102_k141_1429899_extended_circular	SRR6754102_k141_1429899_extended_circular	1	70750	circular	Rimov	1	dsDNA,Myoviridae,Cba41virus	0.9300873820146627,0.93189438159386,0.9502482353524612	Bacteria,Flavobacteriaceae,Cellulophaga	0.9555941434152887,0.962798763230651,0.9615061817819059
SRR9214415_k141_265468_self_circular	SRR9214415_k141_265468_self_circular,SRR9214416_k141_1064201_self_circular	2	70724	circular	Jiricka_pond	1	dsDNA,Siphoviridae,Lambdavirus	0.9951965114454184,0.9969671987730081,0.9968812162154715	Bacteria,Enterobacteriaceae,Escherichia	0.9969848849599432,0.9979284931372389,0.9981067547434143
SRR8894379_k141_1368308_extended_circular	SRR8894379_k141_1368308_extended_circular	1	70680	circular	Fuxian	1	dsDNA,Siphoviridae,Cba41virus	0.991109062170706,0.9363348187333799,0.9306594078718984	Bacteria,Pseudomonadaceae,Pseudomonas	0.9951679229646,0.9639112012694881,0.9679731432425458
SRR9214418_k141_835632_extended_partial	SRR9214418_k141_835632_extended_partial	1	70660	high-quality	Jiricka_pond	1	dsDNA,Siphoviridae,Lambdavirus	0.9976276819944847,0.9981636104836561,0.9982753015467184	Bacteria,Enterobacteriaceae,Escherichia	0.9980867437546864,0.9986135422971846,0.9986922945134924
SRR8894380_k141_3339434_extended_circular	SRR8894380_k141_3339434_extended_circular	1	70559	circular	Fuxian	1	dsDNA,Siphoviridae,T4virus	0.9837356792144026,0.9737640625665002,0.9822322997999791	Bacteria,Synechococcaceae,Synechococcus	0.991000434113422,0.992791646899079,0.9933443646134461
ERR2814725_NODE_17_length_69952_cov_48.911980_extended_circular	ERR2814725_NODE_17_length_69952_cov_48.911980_extended_circular	1	70406	circular	Soyang	1	dsDNA,Siphoviridae,T4virus	0.9962600609824451,0.9887136918995518,0.99012293297921	Bacteria,Synechococcaceae,Synechococcus	0.9975310785745294,0.9966258772719093,0.996846759904839
SRR9302960_k141_1537324_self_circular	SRR9302960_k141_1537324_self_circular	1	70395	circular	Fuxian	1	dsDNA,Siphoviridae,Barnyardvirus	0.992223056745062,0.9930296013379635,0.8328447606085485	Bacteria,Mycobacteriaceae,Mycobacterium	0.99551679229646,0.9354254257529406,0.9431809556442781
SRR6754089_k141_3223118_self_circular	SRR6754089_k141_3223118_self_circular	1	70315	circular	Rimov	1	dsDNA,Myoviridae,T4virus	0.9773992220254243,0.9707060405392838,0.9763501413371096	Bacteria,Burkholderiaceae,Ralstonia	0.9869892260941632,0.9914174587334565,0.9922600317058942
SRR6754087_k141_3338936_self_circular	SRR6754087_k141_3338936_self_circular	1	70248	circular	Rimov	1	dsDNA,Siphoviridae,Cba41virus	0.9801779028316481,0.9824069155434215,0.9854172062089145	Bacteria,Flavobacteriaceae,Cellulophaga	0.9887035794624887,0.9942885304366319,0.9946889374188106
SRR6754099_k141_247471_self_circular	SRR6754099_k141_247471_self_circular	1	70212	circular	Rimov	1	dsDNA,Siphoviridae,T4virus	0.8750672600497724,0.8832592209610071,0.9141948743945647	Bacteria,Mycobacteriaceae,Mycobacterium	0.9213197048028731,0.9262232728581478,0.9310364270796962
SRR6754086_k141_76593_extended_circular	SRR6754086_k141_76593_extended_circular,SRR6754097_k141_548878_extended_circular,SRR6754094_k141_4006395_extended_circular,SRR6754088_k141_1619642_extended_circular	4	70067	circular	Rimov	1	dsDNA,Siphoviridae,M12virus	0.9465254579288389,0.9342635605149456,0.9487329252098016	Bacteria,Pseudomonadaceae,Pseudomonas	0.9527826670350054,0.9671564938570517,0.9701786763765065
SRR9214414_k141_818017	SRR9214414_k141_818017	1	69970	circular	Jiricka_pond	1	dsDNA,Podoviridae,Prtbvirus	0.9614585902293568,0.9790399387134554,0.9861445550773911	Bacteria,Vibrionaceae,Salinivibrio	0.9789099806622203,0.9910289233890097,0.9919369004994437
ERR3687822_contig-140_194_extended_circular	ERR3687821_contig-140_146_extended_partial,ERR3687822_contig-140_194_extended_circular	2	69796	circular	Lake_Rotsee	1	dsDNA,Myoviridae,Nit1virus	0.9839626818823846,0.985472819070708,0.9891393589411563	Bacteria,Synechococcaceae,Synechococcus	0.9891961008721734,0.9940492744613674,0.9943137582327976
SRR9214416_k141_227145	SRR9214416_k141_227145	1	69911	high-quality	Jiricka_pond	1	dsDNA,Podoviridae,Prtbvirus	0.998263849965249,0.9984457681861674,0.9985811186846006	Bacteria,Vibrionaceae,Salinivibrio	0.9984908638857097,0.9989795834901107,0.9990110883883127
ERS4600313_contig-140_61_self_circular	ERS4600313_contig-140_61_self_circular	1	69875	circular	SAS2	1	dsDNA,Siphoviridae,Lambdavirus	0.997299789251844,0.9980753376828705,0.9978785658002766	Bacteria,Enterobacteriaceae,Escherichia	0.9980504360866648,0.9986830696746118,0.9987031378425679
SRR9214414_k141_1718517_extended_partial	SRR9214414_k141_1718517_extended_partial,SRR9214416_k141_414576_extended_partial	2	69716	high-quality	Jiricka_pond	1	dsDNA,Siphoviridae,Lambdavirus	0.9901506064614488,0.9900850729117572,0.9897620136543219	Bacteria,Enterobacteriaceae,Escherichia	0.9941292079403291,0.9954295973955862,0.9953698984847532
SRR8894379_k141_106164_extended_circular	SRR8894379_k141_106164_extended_circular	1	69706	circular	Fuxian	1	dsDNA,Podoviridae,Bcep22virus	0.9822713718808151,0.9757864554844995,0.9746502388679806	Bacteria,Pseudomonadaceae,Pseudomonas	0.9875938276964363,0.9846794378916027,0.985931864857421
SRR9214418_k141_619114	SRR9214418_k141_619114	1	69663	high-quality	Jiricka_pond	1	dsDNA,Podoviridae,Lambdavirus	0.9956673317938255,0.9964186463681259,0.9964927457970807	Bacteria,Enterobacteriaceae,Escherichia	0.9969517344804452,0.9974090827293994,0.9976795275778388
ERS4600504_contig-140_130_extended_partial	ERS4600504_contig-140_130_extended_partial	1	69630	circular	Mekkojärvi	1	dsDNA,Siphoviridae,Lambdavirus	0.9848482725377217,0.9933795399410779,0.9946798838445898	Bacteria,Enterobacteriaceae,Escherichia	0.9921149216622598,0.9969673793904494,0.9971829031061801
SRR7054680_k141_1246727_extended_circular	SRR7054680_k141_1246727_extended_circular	1	69568	circular	Zurich	1	dsDNA,Podoviridae,Nit1virus	0.9818089590386296,0.9863823441788029,0.9886654801329064	Bacteria,Synechococcaceae,Synechococcus	0.9881842219503532,0.9926096487640487,0.993485327891428
SRR6754086_k141_1191644_extended_circular	SRR6754086_k141_1191644_extended_circular,SRR6754087_k141_3086528_extended_partial	2	69539	circular	Rimov	1	dsDNA,Podoviridae,Vp5virus	0.9527287962693093,0.9675597457112818,0.9222866305563668	Bacteria,Enterobacteriaceae,Mycobacterium	0.9732522988278938,0.9310411111292882,0.9279894516094753
ERS4600313_contig-140_62_self_circular	ERS4600313_contig-140_62_self_circular,ERS4600403_contig-140_43_self_circular,ERS4600402_contig-140_20_self_circular,ERS4600369_contig-140_9_self_circular,ERS4600314_contig-140_57_self_circular,ERS4600370_contig-140_7_self_circular	6	69524	circular	SAS2	1	dsDNA,Siphoviridae,T4virus	0.9564238952536824,0.9669512939058665,0.9739366655462556	Bacteria,Enterobacteriaceae,Mycobacterium	0.9737416630490549,0.9793565036726815,0.9809482708143124
ERS4600462_contig-140_130_extended_circular	ERS4600462_contig-140_130_extended_circular	1	69432	circular	Loclat	1	dsDNA,Podoviridae,Lambdavirus	0.9865367800372172,0.9901339382121921,0.9857533295496498	Bacteria,Pseudomonadaceae,Pseudomonas	0.9918544536090611,0.9952067008032457,0.9955260424234407
ERS4600553_contig-140_48_extended_partial	ERS4600553_contig-140_48_extended_partial,ERS4600552_contig-140_157_extended_partial	2	69430	circular	Mekkojärvi	1	dsDNA,Myoviridae,Lambdavirus	0.9971582628971145,0.9981368133834176,0.9979860150649379	Bacteria,Enterobacteriaceae,Escherichia	0.9979273057342437,0.9987137435175946,0.9987443424930549
SRR6754095_k141_514993_self_circular	SRR6754103_k141_559605,SRR6754095_k141_514993_self_circular	2	62843	circular	Rimov	1	dsDNA,Podoviridae,Bpp1virus	0.9982764612245814,0.9984867519865321,0.9985618329191486	Bacteria,Flavobacteriaceae,Cellulophaga	0.9985587434389676,0.9991799859309307,0.9991780756560756
SRR6754103_k141_1526733_self_circular	SRR6754103_k141_1526733_self_circular	1	69263	circular	Rimov	1	dsDNA,Siphoviridae,Cba41virus	0.9876199470887609,0.988070561493828,0.9901311983072608	Bacteria,Flavobacteriaceae,Cellulophaga	0.9931204862070326,0.9941392510674497,0.9944178541919226
ERS4600454_contig-140_26_self_circular	ERS4600454_contig-140_26_self_circular	1	69231	circular	Lovojärvi	1	dsDNA,Myoviridae,Pbunavirus	0.9789742281909288,0.9409644118745832,0.948964354395226	Bacteria,Enterobacteriaceae,Pseudomonas	0.9882284225896839,0.9396338770101592,0.9465228696653532
SRR6754098_k141_524725_self_circular	SRR6754098_k141_524725_self_circular	1	69205	circular	Rimov	1	dsDNA,Podoviridae,Bpp1virus	0.9808547070824832,0.9898738487098773,0.9908778329411895	Bacteria,Flavobacteriaceae,Cellulophaga	0.9892845021508346,0.9960778379439528,0.9963935087494822
SRR9214414_k141_1267252_extended_circular	SRR9214414_k141_1267252_extended_circular	1	69188	circular	Jiricka_pond	1	dsDNA,Siphoviridae,Lambdavirus	0.990995560836715,0.9943521170497338,0.9947377411409459	Bacteria,Enterobacteriaceae,Escherichia	0.9949548127392557,0.9969489750846598,0.9972501317464483
SRR9214416_k141_304176_extended_partial	SRR9214416_k141_304176_extended_partial	1	69176	high-quality	Jiricka_pond	1	dsDNA,Podoviridae,Lambdavirus	0.9976318857475954,0.9976749574793071,0.9978758106909263	Bacteria,Enterobacteriaceae,Escherichia	0.9981467303366353,0.9985419699968917,0.9986294032048544
ERS4600484_contig-140_90_self_circular	ERS4600484_contig-140_90_self_circular	1	69122	circular	Loclat	1	dsDNA,Myoviridae,Nit1virus	0.9812218348541578,0.9821231815408963,0.9874174155972251	Bacteria,Synechococcaceae,Synechococcus	0.987787994790639,0.9929143422710095,0.993550387865881
ERS4600504_contig-140_114_self_circular	ERS4600504_contig-140_114_self_circular,ERS4600524_contig-140_127_self_circular	2	69102	circular	Mekkojärvi	1	dsDNA,Siphoviridae,Lambdavirus	0.9974427168576104,0.9980643035827723,0.9978372391600223	Bacteria,Enterobacteriaceae,Escherichia	0.9981214728284463,0.9987137435175946,0.9987443424930549
SRR6754100_NODE_1606_length_33240_cov_4.990034_self_circular	SRR6754101_k141_2323997,SRR6754100_NODE_1606_length_33240_cov_4.990034_self_circular	2	33113	circular	Rimov	1	dsDNA,Myoviridae,P12024virus	0.9956266955137547,0.9973502396764171,0.9970217267923364	Bacteria,Flavobacteriaceae,Cellulophaga	0.9972169383164292,0.9974704304153648,0.9976990455701747
SRR6754101_k141_1740732_extended_partial	SRR6754101_k141_1740732_extended_partial	1	69070	high-quality	Rimov	1	dsDNA,Podoviridae,Bpp1virus	0.9969690940071295,0.9972635431756456,0.9972145844468567	Bacteria,Flavobacteriaceae,Cellulophaga	0.9978341686727968,0.9984090500106336,0.9985339819089898
ERS4600506_contig-140_2327_extended_partial	ERS4600506_contig-140_2327_extended_partial,ERS4600505_contig-140_920_extended_partial,ERS4600504_contig-140_553_extended_partial	3	69016	high-quality	Mekkojärvi	1	dsDNA,Myoviridae,Lambdavirus	0.9974805506356075,0.9981872549838666,0.9981347909698536	Bacteria,Enterobacteriaceae,Escherichia	0.9980520146809266,0.998820079506601,0.9988267517940288
SRR6754089_k141_2369746_extended_partial	SRR6754089_k141_2369746_extended_partial	1	68974	high-quality	Rimov	1	dsDNA,Myoviridae,Cba41virus	0.9720842768423649,0.9814753222351303,0.9853951653341121	Bacteria,Flavobacteriaceae,Cellulophaga	0.9833063656813608,0.9908980483256171,0.991628949953699
SRR6754102_k141_596581_extended_partial	SRR6754102_k141_596581_extended_partial	1	68928	high-quality	Rimov	1	dsDNA,Myoviridae,Phicbkvirus	0.9412147164988902,0.9471230160293949,0.9701759412831096	Bacteria,Synechococcaceae,Synechococcus	0.9657255613875844,0.9728495591146302,0.9736962523286049
SRR6754100_NODE_377_length_68456_cov_5.122700_extended_circular	SRR6754100_NODE_377_length_68456_cov_5.122700_extended_circular,SRR6754101_k141_2173711_extended_circular	2	68875	circular	Rimov	1	dsDNA,Siphoviridae,Bxz1virus	0.9717087415644687,0.9491548667474783,0.9538574286013412	Bacteria,Mycobacteriaceae,Mycobacterium	0.9842614152097557,0.9491857117149541,0.9511486338489697
ERR3687827_contig-140_547_extended_circular	ERR3687827_contig-140_547_extended_circular	1	68837	circular	Lake_Rotsee	1	dsDNA,Siphoviridae,Cba41virus	0.9861542385041365,0.9881068163941507,0.9903874234768378	Bacteria,Flavobacteriaceae,Cellulophaga	0.9918070957812068,0.9962905099219658,0.996118088190964
SRR9302959_k141_2274023_extended_circular	ERR2814753_NODE_874_length_12773_cov_16.753835_extended_partial,SRR9302959_k141_2274023_extended_circular	2	63982	circular	Soyang,Fuxian	2	dsDNA,Podoviridae,Bpp1virus	0.9960302558123894,0.9970349796736113,0.9969996859175341	Bacteria,Flavobacteriaceae,Cellulophaga	0.9974947709065077,0.9984479035450783,0.9985621745645861
ERS4600455_contig-140_76_self_circular	ERS4600455_contig-140_76_self_circular,ERS4600459_contig-140_149_self_circular,ERS4600456_contig-140_121_self_circular	3	68667	circular	Lovojärvi	1	dsDNA,Siphoviridae,Lambdavirus	0.996508082415981,0.9974274783771045,0.9971870333533538	Bacteria,Enterobacteriaceae,Escherichia	0.9976352657958089,0.9982883995615686,0.9984233799524195
SRR6754088_k141_1423779_self_circular	SRR6754088_k141_1423779_self_circular	1	68662	circular	Rimov	1	dsDNA,Siphoviridae,Cba41virus	0.9566340829092214,0.9632816674732069,0.9765402438822797	Bacteria,Flavobacteriaceae,Cellulophaga	0.9735617033032085,0.9875382400575851,0.9874022202800615
SRR9214418_k141_1260001	SRR9214418_k141_1260001	1	68633	high-quality	Jiricka_pond	1	dsDNA,Myoviridae,Lambdavirus	0.9972521467165886,0.998154152683572,0.9981265256418027	Bacteria,Enterobacteriaceae,Escherichia	0.9980125498243814,0.9987689564349633,0.998789884475172
ERR2814751_NODE_23_length_68724_cov_13.696998_self_circular	ERR2814751_NODE_23_length_68724_cov_13.696998_self_circular	1	68597	circular	Soyang	1	dsDNA,Myoviridae,Cba41virus	0.9851075039795529,0.9878451505918219,0.9892716041899703	Bacteria,Flavobacteriaceae,Cellulophaga	0.9920123130352421,0.996239386850328,0.9965366406932791
SRR6754103_k141_1339588	SRR6754103_k141_1339588	1	68575	high-quality	Rimov	1	dsDNA,Siphoviridae,Lambdavirus	0.9977397820774387,0.9981178977832493,0.997873055581576	Bacteria,Enterobacteriaceae,Escherichia	0.9982461817751292,0.9987914505864839,0.9988072338016929
SRR6754092_k141_925202_self_circular	SRR6754100_NODE_587_length_55130_cov_20.035180_extended_circular,SRR6754092_k141_925202_self_circular,SRR6754096_k141_275894_extended_partial,SRR6754101_k141_561951_self_circular	4	67797	circular	Rimov	1	dsDNA,Myoviridae,Cp8virus	0.9467776831154855,0.9509077123630787,0.9729145199772979	Bacteria,Synechococcaceae,Synechococcus	0.964582659142034,0.9732728581477906,0.9772984062474925
ERS4600337_contig-140_165_self_circular	ERS4600333_contig-140_1567_extended_partial,ERS4600337_contig-140_165_self_circular,ERS4600326_contig-140_91_self_circular,ERS4600329_contig-140_45_self_circular,ERS4600341_contig-140_167_self_circular,ERS4600340_contig-140_376_extended_partial,ERS4600334_contig-140_1336_extended_partial,ERS4600332_contig-140_983_extended_circular,ERS4600330_contig-140_43_self_circular,ERS4600335_contig-140_482_e…	11	67299	circular	Alinen_Mustajärvi	1	dsDNA,Siphoviridae,Phic31virus	0.9929559110373741,0.9942748783490464,0.9928890627669013	Bacteria,Enterobacteriaceae,Streptomyces	0.9960756146651407,0.9963702619137206,0.9967123026243025
SRR9214414_k141_1065065_extended_circular	SRR9214414_k141_1065065_extended_circular	1	68437	circular	Jiricka_pond	1	dsDNA,Siphoviridae,Lambdavirus	0.997676725780777,0.9983953265857184,0.9981623420633565	Bacteria,Enterobacteriaceae,Escherichia	0.9981719878448242,0.9987464622834427,0.998789884475172
SRR9214414_k141_644070_extended_circular	SRR9214414_k141_644070_extended_circular	1	68385	circular	Jiricka_pond	1	dsDNA,Siphoviridae,Lambdavirus	0.9977019482994417,0.9982613410845259,0.9981623420633565	Bacteria,Enterobacteriaceae,Escherichia	0.9981719878448242,0.9986789798288809,0.9987248245007189
ERS4600569_NODE_246_length_67434_cov_83.470694_self_circular	ERS4600570_NODE_116_length_62112_cov_15.297798_extended_partial,ERS4600569_NODE_246_length_67434_cov_83.470694_self_circular	2	67307	circular	Björntjärnan	1	dsDNA,Podoviridae,Bpp1virus	0.9757289307894088,0.9739847445684642,0.9423520919545296	Bacteria,Pseudomonadaceae,Pseudomonas	0.9870129050080902,0.9380061184092136,0.9465445563235042
SRR6754087_k141_2969008_extended_circular	SRR6754087_k141_2969008_extended_circular	1	68244	circular	Rimov	1	dsDNA,Podoviridae,Bpp1virus	0.9713864538259759,0.9837593809554585,0.9868581283991161	Bacteria,Flavobacteriaceae,Cellulophaga	0.9813836378704763,0.9932844733096667,0.9937564111183159
SRR9214416_k141_578197_extended_circular	SRR9214416_k141_578197_extended_circular	1	68201	circular	Jiricka_pond	1	dsDNA,Siphoviridae,Lambdavirus	0.9982988812411722,0.9985687195872616,0.9985700982471994	Bacteria,Enterobacteriaceae,Escherichia	0.9985587434389676,0.9990511557904036,0.9990739796969507
SRR6754101_k141_3257645_extended_circular	SRR6754101_k141_3257645_extended_circular	1	68169	circular	Rimov	1	dsDNA,Siphoviridae,Cba41virus	0.9851271214940699,0.9894309084059351,0.9905692606939569	Bacteria,Flavobacteriaceae,Cellulophaga	0.98998697659734,0.9946975150097338,0.9947518287274486
SRR6754086_k141_3438069_self_circular	SRR6754086_k141_3438069_self_circular,SRR6754096_k141_2613868_self_circular,SRR6754098_k141_2312208_self_circular	3	68166	circular	Rimov	1	dsDNA,Siphoviridae,T4virus	0.9616799878931911,0.9400990231668813,0.957987337517426	Bacteria,Bacillaceae,Bacillus	0.976172698212242,0.9612221277013431,0.9662772465751345
ERS4600330_contig-140_40_self_circular	ERS4600330_contig-140_40_self_circular	1	68131	circular	Alinen_Mustajärvi	1	dsDNA,Myoviridae,Vi1virus	0.994184808196758,0.9935119491422564,0.9669111367030158	Bacteria,Enterobacteriaceae,Pseudomonas	0.9966596945420103,0.9097759582508548,0.9179702155436954
SRR9214414_k141_1778314_extended_circular	SRR9214414_k141_1778314_extended_circular	1	68111	circular	Jiricka_pond	1	dsDNA,Siphoviridae,Lambdavirus	0.9976248794924109,0.9983259693851011,0.9982312197971137	Bacteria,Enterobacteriaceae,Escherichia	0.9981341015825408,0.9987362376691151,0.9987747038144663
ERS4600318_contig-140_210_self_circular	ERS4600318_contig-140_210_self_circular,ERS4600319_contig-140_171_self_circular	2	68088	circular	Alinen_Mustajärvi	1	dsDNA,Podoviridae,Cp8virus	0.9732963589893057,0.9868300133827871,0.9897206870140676	Bacteria,Synechococcaceae,Synechococcus	0.985462725442993,0.9943907765799074,0.9948125513702715
SRR6754087_k141_2079922_extended_circular	SRR6754087_k141_2079922_extended_circular,SRR6754093_k141_447669_extended_circular	2	68084	circular	Rimov	1	dsDNA,Myoviridae,Spo1virus	0.934083749971975,0.9615114825574522,0.9600426490927425	Bacteria,Bacillaceae,Bacillus	0.960382019811358,0.9606475043761349,0.9659367660421632
ERS4600320_contig-140_98_self_circular	ERS4600320_contig-140_98_self_circular,ERS4600321_contig-140_74_self_circular	2	68029	circular	Alinen_Mustajärvi	1	dsDNA,Siphoviridae,T4virus	0.9771245768221869,0.9687892597222244,0.9793587207476264	Bacteria,Clostridiaceae,Clostridium	0.9871328781719878,0.9816018289790109,0.9836352477592261
SRR6754103_k141_1042577	SRR6754103_k141_1042577	1	68024	high-quality	Rimov	1	dsDNA,Podoviridae,Bpp1virus	0.9978070421272112,0.998050116882646,0.997939178205983	Bacteria,Flavobacteriaceae,Cellulophaga	0.9982240814554639,0.9988487084267181,0.9988853057710366
ERS4600330_contig-140_41_self_circular	ERS4600330_contig-140_41_self_circular,ERS4600340_contig-140_148_self_circular,ERS4600339_contig-140_323_self_circular	3	67979	circular	Alinen_Mustajärvi	1	dsDNA,Myoviridae,T4virus	0.8652304777705535,0.7851881392881744,0.8976146263245188	Bacteria,Hominidae,Homo	0.9027491219069419,0.8605383054951167,0.8809771140696532
SRR6754086_k141_3731799_extended_partial	SRR6754086_k141_3731799_extended_partial,SRR6754092_k141_1028039_extended_partial,SRR6754101_k141_1314668_extended_partial	3	67913	high-quality	Rimov	1	dsDNA,Siphoviridae,Lambdavirus	0.9978420734031344,0.9982975959848486,0.9982725464373681	Bacteria,Enterobacteriaceae,Escherichia	0.998239867398082,0.9988364388895251,0.9988787997735913
ERR2814750_NODE_1107_length_10716_cov_10.479649_extended_partial	ERR2814750_NODE_1107_length_10716_cov_10.479649_extended_partial	1	67868	high-quality	Soyang	1	dsDNA,Podoviridae,Cba41virus	0.9939634105329238,0.9962673215667791,0.996514786671883	Bacteria,Flavobacteriaceae,Cellulophaga	0.996115079521686,0.9979428075972975,0.9981024174117841
ERS4600338_contig-140_2319_extended_partial	ERS4600338_contig-140_2319_extended_partial,ERS4600328_contig-140_108_extended_partial	2	67861	circular	Alinen_Mustajärvi	1	dsDNA,Myoviridae,Lambdavirus	0.997243739210367,0.9980217434823935,0.9979143822218304	Bacteria,Enterobacteriaceae,Escherichia	0.9979225699514582,0.9986626204459568,0.9987226558349038
ERS4600385_contig-140_44_self_circular	ERS4600385_contig-140_44_self_circular	1	67855	circular	SAS2	1	dsDNA,Myoviridae,Pbunavirus	0.9742534134475259,0.9607059932502834,0.971994313454301	Bacteria,Mycobacteriaceae,Mycobacterium	0.9848960101030033,0.9298325617157721,0.9416216849232184
SRR9302966_k141_2103233_extended_circular	SRR9302965_k141_1769859_extended_partial,SRR9302966_k141_2103233_extended_circular	2	67558	circular	Dianchi	1	dsDNA,Siphoviridae,Lambdavirus	0.9947607223729346,0.9969356727727274,0.996638766592646	Bacteria,Enterobacteriaceae,Escherichia	0.9969738348001105,0.9978691903741391,0.9980677187587425
ERS4600455_contig-140_2776_extended_circular	ERS4600455_contig-140_2776_extended_circular,ERS4600456_contig-140_2257_extended_circular	2	67828	circular	Lovojärvi	1	dsDNA,Podoviridae,Cba41virus	0.9721501356411004,0.9796499668188847,0.9844115912960585	Bacteria,Flavobacteriaceae,Cellulophaga	0.9819882394727495,0.9913540661246257,0.9920453337901989
SRR6754087_k141_2219501_extended_circular	SRR6754087_k141_2219501_extended_circular	1	67814	circular	Rimov	1	dsDNA,Siphoviridae,T4virus	0.9863307961347891,0.9746515194743985,0.9803588254417818	Bacteria,Synechococcaceae,Synechococcus	0.9924211689490509,0.9953396207895038,0.9956670057014224
SRR6754087_k141_649987_self_circular	SRR6754089_k141_1182340_extended_partial,SRR6754087_k141_649987_self_circular	2	67129	circular	Rimov	1	dsDNA,Podoviridae,Cba41virus	0.9920324866040401,0.9933590480408955,0.9946853940632904	Bacteria,Flavobacteriaceae,Cellulophaga	0.9956872804767355,0.99709007476238,0.9974843476544795
ERS4600502_contig-140_104_self_circular	ERS4600502_contig-140_104_self_circular	1	67745	circular	Loclat	1	dsDNA,Siphoviridae,Phic31virus	0.993940990516333,0.9939028715457355,0.9948920272645622	Bacteria,Enterobacteriaceae,Streptomyces	0.9959572200955049,0.9969571547761218,0.9972262764224821
SRR9214418_k141_1160454_extended_partial	SRR9214418_k141_1160454_extended_partial	1	67744	circular	Jiricka_pond	1	dsDNA,Siphoviridae,Lambdavirus	0.9974581306190167,0.9981935601839227,0.9980383621425934	Bacteria,Enterobacteriaceae,Escherichia	0.998015707012905,0.9986462610630327,0.9987031378425679
ERS4600472_contig-140_110_self_circular	ERS4600472_contig-140_110_self_circular	1	67681	circular	Loclat	1	dsDNA,Siphoviridae,Lambdavirus	0.997168071654373,0.9979902174821129,0.9978510147067737	Bacteria,Enterobacteriaceae,Escherichia	0.9979052054145783,0.9985276555368332,0.9985925358859976
SRR6754087_k141_1487295_self_circular	SRR6754087_k141_1487295_self_circular	1	67601	circular	Rimov	1	dsDNA,Siphoviridae,Lambdavirus	0.9974385131044997,0.9981115925831932,0.9980383621425934	Bacteria,Enterobacteriaceae,Escherichia	0.9980772721891156,0.998707608748998,0.9987378364956095
ERS4600466_contig-140_130_self_circular	ERS4600466_contig-140_130_self_circular	1	67588	circular	Loclat	1	dsDNA,Myoviridae,Cba41virus	0.9601554267650158,0.9427487834904642,0.9715342101928025	Bacteria,Bacillaceae,Bacillus	0.9763700224949682,0.9819740049405337,0.9839627162973067
SRR5338504_k141_2161378_self_circular	SRR5338504_k141_2161378_self_circular	1	67585	circular	Tous	1	dsDNA,Podoviridae,Bpp1virus	0.9968752101876556,0.9971736940748459,0.9964569293755269	Bacteria,Flavobacteriaceae,Cellulophaga	0.9978089111646079,0.9983088487902236,0.9984624159370914
SRR6754092_k141_212636_self_circular	SRR6754086_k141_342649_extended_circular,SRR6754092_k141_212636_self_circular,SRR6754088_k141_2117803_extended_circular,SRR6754100_NODE_479_length_60696_cov_3.019416_extended_partial,SRR6754101_k141_2388010_extended_circular,SRR6754095_k141_2089076_extended_circular,SRR6754094_k141_3590198,SRR6754103_k141_1089275_extended_circular	8	67052	circular	Rimov	1	dsDNA,Myoviridae,Avipoxvirus	0.88861035132166,0.8798528366306902,0.9125115025815375	Bacteria,Bacillaceae,Bacillus	0.9261707249694148,0.9393189588888707,0.9415371069564293
SRR6754097_k141_349789_extended_circular	SRR6754097_k141_349789_extended_circular	1	67574	circular	Rimov	1	dsDNA,Siphoviridae,Cba41virus	0.9600447279330987,0.971048097642328,0.9811357662785636	Bacteria,Flavobacteriaceae,Cellulophaga	0.9772035202652039,0.9906178938930423,0.9912147347830141
SRR6754086_k141_1718793_extended_partial	SRR6754086_k141_1718793_extended_partial,SRR6754092_k141_2982117_extended_partial	2	67556	circular	Rimov	1	dsDNA,Siphoviridae,Xp10virus	0.9541426585655673,0.8566024114237615,0.9231186735801544	Bacteria,Mycobacteriaceae,Mycobacterium	0.9737795493113383,0.914452696844275,0.9224029684697677
ERR3687821_contig-140_96_self_circular	ERR3687821_contig-140_96_self_circular,ERR3687822_contig-140_62_self_circular	2	67453	circular	Lake_Rotsee	1	dsDNA,Podoviridae,Bpp1virus	0.9234104208237114,0.8754076705911282,0.9362081981033827	Bacteria,Flavobacteriaceae,Cellulophaga	0.9471170922293698,0.963581968688141,0.9679731432425458
SRR9302960_k141_2288157_extended_circular	SRR9302960_k141_2288157_extended_circular	1	67442	circular	Fuxian	1	dsDNA,Siphoviridae,Nit1virus	0.9872612268233079,0.9885529092981209,0.9897785443104237	Bacteria,Flavobacteriaceae,Cellulophaga	0.993234144993883,0.9962168926988074,0.9964824240479014
SRR6754094_k141_3633293_self_circular	SRR6754088_k141_571922_extended_partial,SRR6754094_k141_3633293_self_circular,SRR6754092_k141_2085751_self_circular,SRR6754086_k141_1849035_extended_circular	4	55313	circular	Rimov	1	dsDNA,Siphoviridae,T4virus	0.9665213102257696,0.9754223301812588,0.9817308698982262	Bacteria,Synechococcaceae,Synechococcus	0.9800844547930069,0.992049339898899,0.9922838870298604
SRR6754086_k141_168974_self_circular	SRR6754086_k141_168974_self_circular,SRR6754094_k141_4613112_self_circular,SRR6754088_k141_3360443_self_circular	3	67317	circular	Rimov	1	dsDNA,Podoviridae,T4virus	0.9875765083066161,0.9881541053945715,0.984976388712868	Bacteria,Pseudomonadaceae,Pseudomonas	0.9925269347645921,0.992149541119309,0.9929344867743916
ERS4600474_contig-140_1307_extended_partial	ERS4600474_contig-140_1307_extended_partial	1	67301	high-quality	Loclat	1	dsDNA,Podoviridae,T4virus	0.9670257605990629,0.9762057512882312,0.9659330728836627	Bacteria,Synechococcaceae,Synechococcus	0.9815462330794428,0.9605677523843801,0.9671078455823193
ERS4600386_contig-140_1533_extended_circular	ERS4600386_contig-140_1533_extended_circular	1	67299	circular	SAS2	1	dsDNA,Myoviridae,Lambdavirus	0.9977762146043988,0.9982786803846803,0.9980879541108987	Bacteria,Enterobacteriaceae,Escherichia	0.9981719878448242,0.9988691576553732,0.9989026550975574
ERS4600483_contig-140_82	ERS4600483_contig-140_82	1	67282	high-quality	Loclat	1	dsDNA,Siphoviridae,Lambdavirus	0.9971610653991884,0.9979665729819025,0.9977793818636662	Bacteria,Enterobacteriaceae,Escherichia	0.9979367772998146,0.998499026616716,0.9985838612227371
SRR8894380_k141_5122705	SRR8894380_k141_5122705	1	67250	high-quality	Fuxian	1	dsDNA,Siphoviridae,Lambdavirus	0.9978070421272112,0.998377987285564,0.9983910161394306	Bacteria,Enterobacteriaceae,Escherichia	0.9981719878448242,0.9988548431953147,0.9988853057710366
SRR9214415_k141_1628953_extended_circular	SRR9214415_k141_1628953_extended_circular	1	67199	circular	Jiricka_pond	1	dsDNA,Podoviridae,Bpp1virus	0.9894555859471336,0.9932455544398854,0.9937762079776946	Bacteria,Flavobacteriaceae,Cellulophaga	0.9938261178420617,0.9973313756605101,0.9976166362692008
SRR6754093_k141_566802_self_circular	SRR6754093_k141_566802_self_circular,SRR6754087_k141_1988277_extended_circular	2	67185	circular	Rimov	1	dsDNA,Siphoviridae,Cba41virus	0.9767798690671031,0.9758778808853131,0.9772813682975078	Bacteria,Enterobacteriaceae,Bacillus	0.9863388452582975,0.984182521635284,0.9845656053939056
SRR9214415_k141_1320165_extended_circular	SRR9214415_k141_1320165_extended_circular	1	67163	circular	Jiricka_pond	1	dsDNA,Siphoviridae,Lambdavirus	0.9974987668990875,0.9979697255819305,0.9976388712868014	Bacteria,Enterobacteriaceae,Escherichia	0.9980204427956905,0.998499026616716,0.9985947045518127
SRR6754097_k141_905916_extended_partial	SRR6754097_k141_905916_extended_partial,SRR6754086_k141_1873675_extended_partial	2	67145	circular	Rimov	1	dsDNA,Siphoviridae,Lambdavirus	0.9967701163598861,0.9977285516797841,0.9976306059587505	Bacteria,Enterobacteriaceae,Escherichia	0.9977331386400411,0.9982393214127963,0.9983843439677476
ERS4600504_contig-140_122_self_circular	ERS4600504_contig-140_122_self_circular,ERS4600505_contig-140_158_self_circular	2	67089	circular	Mekkojärvi	1	dsDNA,Myoviridae,Pbunavirus	0.9959293657377306,0.9962452533665828,0.9738347265002948	Bacteria,Enterobacteriaceae,Pseudomonas	0.9974474130786535,0.9762339064570484,0.9759234721207166
SRR9302963_k141_697562_extended_partial	SRR9302963_k141_697562_extended_partial	1	67055	high-quality	Xingyun	1	dsDNA,Podoviridae,Bpp1virus	0.9977453870815864,0.9982187809841472,0.9979749946275368	Bacteria,Flavobacteriaceae,Cellulophaga	0.9981846165989187,0.9987362376691151,0.9987616918195756
ERS4600464_contig-140_3969_extended_circular	ERS4600464_contig-140_3969_extended_circular	1	67051	circular	Loclat	1	dsDNA,Siphoviridae,Lambdavirus	0.9970475640651975,0.9976986019795175,0.9975479526782418	Bacteria,Enterobacteriaceae,Escherichia	0.9978909980662221,0.9985460598426228,0.998622897207409
SRR6754087_k141_3574685_self_circular	SRR6754087_k141_3574685_self_circular	1	67049	circular	Rimov	1	dsDNA,Podoviridae,Bpp1virus	0.9781068537990718,0.9879681019929161,0.9834390376954061	Bacteria,Flavobacteriaceae,Bordetella	0.9874722759382769,0.9908080717195348,0.9887077571007541
ERS4600385_contig-140_46_self_circular	ERS4600385_contig-140_46_self_circular,ERS4600386_contig-140_35_self_circular	2	66993	circular	SAS2	1	dsDNA,Siphoviridae,Phicbkvirus	0.9387387059166423,0.9603860043474355,0.9710768620406544	Bacteria,Mycobacteriaceae,Mycobacterium	0.956953313074707,0.9821703175356226,0.9847325926616686
SRR6754103_k141_343009_self_circular	SRR6754103_k141_343009_self_circular	1	66993	circular	Rimov	1	dsDNA,Siphoviridae,Lambdavirus	0.9973488330381365,0.9980721850828425,0.998024586595842	Bacteria,Enterobacteriaceae,Escherichia	0.9980551718694503,0.9986135422971846,0.9986749451869715
SRR6754103_k141_520810_extended_circular	SRR6754103_k141_520810_extended_circular	1	66991	circular	Rimov	1	dsDNA,Myoviridae,Spo1virus	0.9420708808824518,0.9694686450282709,0.965090009422474	Bacteria,Bacillaceae,Bacillus	0.9661533604325349,0.9706103685768973,0.971443008546712
SRR6754092_k141_2031001_extended_circular	SRR6754086_k141_3295577_extended_partial,SRR6754092_k141_2031001_extended_circular,SRR6754088_k141_2462580_extended_circular	3	65820	circular	Rimov	1	dsDNA,Siphoviridae,Lambdavirus	0.9970237427975697,0.9978940631812572,0.9978151982852199	Bacteria,Enterobacteriaceae,Escherichia	0.9979115197916255,0.9985746887627399,0.9986619331920809
SRR6754095_k141_790280_self_circular	SRR6754095_k141_790280_self_circular	1	66893	circular	Rimov	1	dsDNA,Podoviridae,P12002virus	0.9979373584736453,0.9983543427853536,0.9984764245292895	Bacteria,Flavobacteriaceae,Cellulophaga	0.9983487904021469,0.9989714037986487,0.9989807270669012
SRR6754089_k141_1979780_extended_circular	SRR6754089_k141_1979780_extended_circular,SRR6754099_k141_227013_extended_circular	2	66862	circular	Rimov	1	dsDNA,Siphoviridae,Lambdavirus	0.9976010582247831,0.9981462711835019,0.9979832599555877	Bacteria,Enterobacteriaceae,Escherichia	0.9980851651604247,0.9986299016801087,0.9986944631793074
ERR2814750_NODE_14_length_62793_cov_11.918377_extended_partial	ERR2814750_NODE_14_length_62793_cov_11.918377_extended_partial,ERR2814751_NODE_35_length_61146_cov_7.405267_extended_partial	2	66852	high-quality	Soyang	1	dsDNA,Siphoviridae,Lambdavirus	0.9970405578100128,0.9978893342812151,0.9978399942693725	Bacteria,Enterobacteriaceae,Escherichia	0.9979115197916255,0.998503116462447,0.9986055478808882
ERR2814726_NODE_686_length_11499_cov_19.407668_extended_circular	ERR2814726_NODE_686_length_11499_cov_19.407668_extended_circular,ERR2814725_NODE_189_length_26921_cov_33.649250_extended_partial	2	66850	circular	Soyang	1	dsDNA,Siphoviridae,Lambdavirus	0.997697744546331,0.9980201671823795,0.9978372391600223	Bacteria,Enterobacteriaceae,Escherichia	0.9981562019022061,0.9985828684542019,0.9986619331920809
SRR6754093_k141_300801_extended_partial	SRR6754093_k141_300801_extended_partial	1	66838	high-quality	Rimov	1	dsDNA,Siphoviridae,Lambdavirus	0.997413290585835,0.9983133589849889,0.99819540337556	Bacteria,Enterobacteriaceae,Escherichia	0.9981056868858281,0.9987750912035598,0.9987877158093569
SRR6754089_k141_1896557_extended_circular	SRR6754089_k141_1896557_extended_circular	1	66758	circular	Rimov	1	dsDNA,Podoviridae,Bcep22virus	0.9763973275340224,0.970234726835089,0.9561138631592287	Bacteria,Enterobacteriaceae,Mycobacterium	0.9857816014838786,0.948719469301618,0.9429836070551036
SRR9302965_k141_239440_self_circular	SRR9302965_k141_239440_self_circular	1	66716	circular	Dianchi	1	dsDNA,Siphoviridae,Cba41virus	0.9830224424366074,0.9878987447922988,0.9893019103928234	Bacteria,Flavobacteriaceae,Cellulophaga	0.9908788823552627,0.9957608748997988,0.9959901369078729
ERS4600333_contig-140_3737_extended_circular	ERS4600339_contig-140_2420_extended_partial,ERS4600337_contig-140_264_extended_partial,ERS4600332_contig-140_1021_extended_partial,ERS4600329_contig-140_243_extended_partial,ERS4600330_contig-140_1261_extended_partial,ERS4600333_contig-140_3737_extended_circular,ERS4600340_contig-140_2608_extended_circular,ERS4600338_contig-140_1820_extended_circular,ERS4600336_contig-140_3548_extended_circular,E…	10	66688	circular	Alinen_Mustajärvi	1	dsDNA,Siphoviridae,Lambdavirus	0.9975001681501244,0.9980658798827863,0.9978014227384685	Bacteria,Enterobacteriaceae,Escherichia	0.9981293657997553,0.9985174309225056,0.998622897207409
ERS4600472_contig-140_114_self_circular	ERS4600473_contig-140_66_extended_circular,ERS4600472_contig-140_114_self_circular,ERS4600471_contig-140_103_self_circular,ERS4600470_contig-140_57_self_circular	4	66694	circular	Loclat	1	dsDNA,Siphoviridae,Lambdavirus	0.9970769903369728,0.9980674561828003,0.9978923413470281	Bacteria,Enterobacteriaceae,Escherichia	0.9979099411973638,0.9985358352282951,0.9986315718706694
SRR9214416_k141_725692_self_circular	SRR9214416_k141_725692_self_circular	1	66683	circular	Jiricka_pond	1	dsDNA,Siphoviridae,Lambdavirus	0.9964828598973163,0.9977190938796999,0.9972724417432128	Bacteria,Enterobacteriaceae,Escherichia	0.9974142625991554,0.998065502969228,0.9981978387076487
SRR6754101_k141_3428280_self_circular	SRR6754101_k141_3428280_self_circular	1	66662	circular	Rimov	1	dsDNA,Podoviridae,Bpp1virus	0.9971750779095576,0.9973202899761506,0.9970355023390879	Bacteria,Flavobacteriaceae,Cellulophaga	0.9979273057342437,0.998503116462447,0.9985925358859976
SRR6754094_k141_4058469_self_circular	SRR6754094_k141_4058469_self_circular	1	66607	circular	Rimov	1	dsDNA,Podoviridae,Bpp1virus	0.9975197856646414,0.9980343538825057,0.9977435654421124	Bacteria,Flavobacteriaceae,Cellulophaga	0.9981262086112317,0.998499026616716,0.9985773552252919
ERS4600472_contig-140_3811_extended_partial	ERS4600472_contig-140_3811_extended_partial,ERS4600473_contig-140_805_extended_partial,ERS4600468_contig-140_575_extended_partial	3	66602	high-quality	Loclat	1	dsDNA,Siphoviridae,Lambdavirus	0.9975001681501244,0.9981462711835019,0.9979997906116894	Bacteria,Enterobacteriaceae,Escherichia	0.9981025296973045,0.9986421712173017,0.9986749451869715
ERR3687821_contig-140_100_self_circular	ERR3687821_contig-140_100_self_circular,ERR3687822_contig-140_65_self_circular	2	66589	circular	Lake_Rotsee	1	dsDNA,Podoviridae,Bpp1virus	0.9973292155236195,0.9978089429804996,0.9976388712868014	Bacteria,Flavobacteriaceae,Cellulophaga	0.9980235999842141,0.9986626204459568,0.9987139811716433
SRR6475631_k141_3763665_extended_circular	SRR6475631_k141_3763665_extended_circular	1	66571	circular	Zurich	1	dsDNA,Siphoviridae,T4virus	0.9453091720287873,0.9339025878117331,0.9636683729977242	Bacteria,Enterobacteriaceae,Synechococcus	0.9657366115474171,0.9648641353248155,0.9690336208261315
SRR6754103_k141_433039_extended_circular	SRR6754103_k141_433039_extended_circular,SRR6754101_k141_3104273_extended_partial	2	66564	circular	Rimov	1	dsDNA,Siphoviridae,Ampullavirus	0.8679517072842634,0.848222800549183,0.8476396978196065	Bacteria,Bacillaceae,Bacillus	0.9085836062985911,0.9066819899553389,0.9137109558828314
SRR6754086_k141_3685307_self_circular	SRR6754086_k141_3685307_self_circular,SRR6754088_k141_1589384_self_circular,SRR6754092_k141_1650611_self_circular	3	66511	circular	Rimov	1	dsDNA,Myoviridae,Nit1virus	0.985747875703428,0.9880484932936315,0.9899934428397463	Bacteria,Synechococcaceae,Synechococcus	0.9898054382572319,0.9946954700868683,0.9952441158674772
SRR6754100_NODE_843_length_45254_cov_25.226383_extended_circular	SRR6754100_NODE_843_length_45254_cov_25.226383_extended_circular,SRR6754098_k141_2136176_extended_circular,SRR6754092_k141_2592830_extended_circular,SRR6754086_k141_2890412_extended_circular,SRR6754088_k141_452833_extended_partial,SRR6754097_k141_1355886_extended_partial	6	66506	circular	Rimov	1	dsDNA,Podoviridae,Bpp1virus	0.979028876981369,0.9820774688404895,0.9860784324529841	Bacteria,Flavobacteriaceae,Cellulophaga	0.9875117407948222,0.9932946979239943,0.9935005085521337
ERS4600317_contig-140_2_self_circular	ERS4600317_contig-140_2_self_circular	1	66488	circular	B1_2	1	dsDNA,Myoviridae,Pbunavirus	0.9815160975719122,0.978202923406006,0.9795130068712428	Bacteria,Pseudomonadaceae,Pseudomonas	0.9901164213268084,0.971512179560587,0.974678657942847
SRR9214415_k141_1371597_extended_circular	SRR9214415_k141_1371597_extended_circular	1	66484	circular	Jiricka_pond	1	dsDNA,Siphoviridae,Lambdavirus	0.9967897338744031,0.9978562319809204,0.9975479526782418	Bacteria,Enterobacteriaceae,Escherichia	0.9977757606851099,0.9984765324651954,0.9985643432304012
SRR6754103_k141_2050582_self_circular	SRR6754103_k141_2050582_self_circular	1	66467	circular	Rimov	1	dsDNA,Siphoviridae,Lambdavirus	0.9974357106024259,0.9980816428829267,0.9977242796766603	Bacteria,Enterobacteriaceae,Escherichia	0.9981277872054936,0.998619677065781,0.9986901258476772
SRR9302961_k141_2829903_extended_circular	SRR9302961_k141_2829903_extended_circular	1	66432	circular	Erhai	1	dsDNA,Podoviridae,Bpp1virus	0.9968135551420308,0.9969230623726153,0.9962806023771084	Bacteria,Flavobacteriaceae,Cellulophaga	0.9977694463080626,0.9983190734045512,0.9984710906003518
ERR2814753_NODE_66_length_62169_cov_10.079366_self_circular	ERR2814726_NODE_393_length_16098_cov_12.810219_extended_partial,ERR2814751_NODE_581_length_16927_cov_12.713810_extended_circular,ERR2814753_NODE_66_length_62169_cov_10.079366_self_circular,ERR2814752_NODE_50_length_62169_cov_38.811402_self_circular	4	62042	circular	Soyang	1	dsDNA,Siphoviridae,Lambdavirus	0.9981363361208887,0.9985498039870933,0.9986692821838099	Bacteria,Enterobacteriaceae,Escherichia	0.9984150913611429,0.9989366401099351,0.9989655464061954
ERS4600549_contig-140_109_self_circular	ERS4600549_contig-140_109_self_circular	1	66364	circular	Mekkojärvi	1	dsDNA,Siphoviridae,Lambdavirus	0.9851467390085868,0.987474720088525,0.9888032356004209	Bacteria,Enterobacteriaceae,Escherichia	0.9903295315521528,0.9939470283180919,0.9943831555388809
SRR9214414_k141_696416_extended_partial	SRR9214414_k141_696416_extended_partial	1	66339	circular	Jiricka_pond	1	dsDNA,Siphoviridae,Lambdavirus	0.9967392888370737,0.9977900273803313,0.9978482595974234	Bacteria,Enterobacteriaceae,Escherichia	0.997692095189234,0.9985317453825642,0.9986380778681148
SRR9214414_k141_1670848	SRR9214414_k141_1670848	1	66337	high-quality	Jiricka_pond	1	dsDNA,Siphoviridae,Lambdavirus	0.9973488330381365,0.9982928670848065,0.9980631581267461	Bacteria,Enterobacteriaceae,Escherichia	0.9979699277793125,0.9987055638261325,0.9987334991639794
ERS4600385_contig-140_457_extended_circular	ERS4600385_contig-140_457_extended_circular	1	66323	circular	SAS2	1	dsDNA,Siphoviridae,Lambdavirus	0.997696343295294,0.998102134783109,0.9979584639714351	Bacteria,Enterobacteriaceae,Escherichia	0.9981719878448242,0.9986094524514535,0.9986814511844169
ERS4600385_contig-140_48_self_circular	ERS4600385_contig-140_48_self_circular,ERS4600386_contig-140_197_extended_partial	2	66321	circular	SAS2	1	dsDNA,Siphoviridae,Lambdavirus	0.9983661412909446,0.9987468414888468,0.9988593847289798	Bacteria,Enterobacteriaceae,Escherichia	0.9986029440782983,0.9992556480769546,0.9992669909544949
ERS4600477_contig-140_175_extended_partial	ERS4600477_contig-140_175_extended_partial,ERS4600476_contig-140_86_extended_partial	2	66291	circular	Loclat	1	dsDNA,Siphoviridae,Lambdavirus	0.9963973835840638,0.9975267852779884,0.9976691774896546	Bacteria,Enterobacteriaceae,Escherichia	0.9976052725048344,0.9982515909499894,0.9983973559626382
SRR9214416_k141_741875_extended_circular	SRR9214416_k141_741875_extended_circular	1	66257	circular	Jiricka_pond	1	dsDNA,Siphoviridae,Lambdavirus	0.9976571082662601,0.9982440017843717,0.9980659132360964	Bacteria,Enterobacteriaceae,Escherichia	0.998181459410395,0.9986912493660739,0.998726993166534
SRR9214415_k141_1581967_extended_partial	SRR9214415_k141_1581967_extended_partial	1	66253	high-quality	Jiricka_pond	1	dsDNA,Siphoviridae,Lambdavirus	0.9971078178597852,0.9975488534781848,0.997302747946066	Bacteria,Enterobacteriaceae,Escherichia	0.9979478274596472,0.9985174309225056,0.9986098852125184
ERS4600401_contig-140_55_extended_partial	ERS4600401_contig-140_55_extended_partial	1	66240	high-quality	SAS2	1	dsDNA,Siphoviridae,Lambdavirus	0.9966748312893752,0.9980280486824497,0.9976306059587505	Bacteria,Enterobacteriaceae,Escherichia	0.9977110383203757,0.9985910481456639,0.9986619331920809
ERR2814753_NODE_236_length_32639_cov_12.919599_extended_partial	ERR2814753_NODE_236_length_32639_cov_12.919599_extended_partial	1	66219	circular	Soyang	1	dsDNA,Siphoviridae,Lambdavirus	0.9974707418783489,0.9980658798827863,0.9979446884246835	Bacteria,Enterobacteriaceae,Escherichia	0.9980346501440467,0.9986094524514535,0.9986792825186017
SRR9302957_k141_762257_extended_partial	SRR9302957_k141_762257_extended_partial	1	66185	circular	Lugu	1	dsDNA,Podoviridae,Vp5virus	0.9659748223213686,0.9739027769677348,0.9269813368892611	Bacteria,Flavobacteriaceae,Cellulophaga	0.980864280358341,0.935098238094459,0.943345774246226
ERS4600385_contig-140_54_extended_partial	ERS4600385_contig-140_54_extended_partial	1	66184	high-quality	SAS2	1	dsDNA,Siphoviridae,Lambdavirus	0.9978448759052082,0.9984678363863637,0.9984902000760411	Bacteria,Enterobacteriaceae,Escherichia	0.9982493389636529,0.9988364388895251,0.9988007278042476
SRR9302959_k141_1959900_extended_circular	SRR9302959_k141_1959900_extended_circular	1	66182	circular	Fuxian	1	dsDNA,Myoviridae,Ranavirus	0.8745305809026299,0.9141483960359207,0.9453028140686904	Bacteria,Synechococcaceae,Synechococcus	0.9104542404988358,0.919922865509513,0.9297026976034074
SRR9214416_k141_147473	SRR9214416_k141_147473	1	66150	high-quality	Jiricka_pond	1	dsDNA,Siphoviridae,P12024virus	0.9900875501647871,0.993546627742565,0.9939635554135143	Bacteria,Flavobacteriaceae,Cellulophaga	0.9943644184853389,0.9967035843407986,0.9969139885451072
SRR9302962_k141_3071888_extended_partial	SRR9302962_k141_3071888_extended_partial	1	66145	high-quality	Erhai	1	dsDNA,Siphoviridae,Lambdavirus	0.9971484541398561,0.9980107093822953,0.9978372391600223	Bacteria,Enterobacteriaceae,Escherichia	0.9979115197916255,0.998503116462447,0.9986055478808882
ERS4600549_contig-140_908_extended_partial	ERS4600549_contig-140_908_extended_partial	1	66134	high-quality	Mekkojärvi	1	dsDNA,Siphoviridae,Lambdavirus	0.9973922718202811,0.9980958295830529,0.9979860150649379	Bacteria,Enterobacteriaceae,Escherichia	0.9980409645210939,0.9986483059858983,0.998705306508383
ERR3687823_contig-140_112_self_circular	ERR3687823_contig-140_112_self_circular	1	66129	circular	Lake_Rotsee	1	dsDNA,Siphoviridae,Lambdavirus	0.9972605542228101,0.9978562319809204,0.997597544646547	Bacteria,Enterobacteriaceae,Escherichia	0.9980251785784758,0.9985419699968917,0.9986402465339299
SRR6754087_k141_3574464_self_circular	SRR6754087_k141_3574464_self_circular,SRR6754089_k141_3223408_self_circular	2	66105	circular	Rimov	1	dsDNA,Siphoviridae,Alphabaculovirus	0.8952578862408358,0.8690315370343806,0.9269124591555039	Bacteria,Flavobacteriaceae,Cellulophaga	0.9298235920912428,0.932063572562043,0.9420944540709111
SRR6754088_k141_565403_extended_circular	SRR6754088_k141_565403_extended_circular,SRR6754100_NODE_450_length_62759_cov_12.611716_extended_circular,SRR6754092_k141_1883607_extended_partial,SRR6754094_k141_3178433_extended_circular,SRR6754086_k141_115335_extended_circular,SRR6754098_k141_1995038_extended_partial	6	66084	circular	Rimov	1	dsDNA,Podoviridae,Ascovirus	0.9570026119319328,0.9750455944779058,0.9606212220563034	Bacteria,Streptococcaceae,Lactococcus	0.9759374876672323,0.9357669278714806,0.9442783005467207
SRR6754087_k141_1417528_extended_circular	SRR6754087_k141_1417528_extended_circular,SRR6754089_k141_1861499_extended_circular	2	66073	circular	Rimov	1	dsDNA,Podoviridae,Bpp1virus	0.9979289509674237,0.9984741415864199,0.9982835668747693	Bacteria,Flavobacteriaceae,Cellulophaga	0.9983045897628162,0.9990082124102279,0.9990306063806486
ERS4600532_contig-140_325_extended_partial	ERS4600532_contig-140_325_extended_partial	1	66069	circular	Mekkojärvi	1	dsDNA,Podoviridae,Bpp1virus	0.9841756720399973,0.9858842333743697,0.9890016034736419	Bacteria,Flavobacteriaceae,Cellulophaga	0.9910777852322507,0.9948058959216058,0.9953070071761152
ERS4600504_contig-140_127_self_circular	ERS4600504_contig-140_127_self_circular	1	66062	circular	Mekkojärvi	1	dsDNA,Siphoviridae,Lambdavirus	0.997243739210367,0.9980674561828003,0.9979722395181865	Bacteria,Enterobacteriaceae,Escherichia	0.9978878408776984,0.9985419699968917,0.9986445838655601
ERR3687825_contig-140_142_self_circular	ERR3687827_contig-140_206_extended_circular,ERR3687825_contig-140_142_self_circular	2	66013	circular	Lake_Rotsee	1	dsDNA,Siphoviridae,Lambdavirus	0.9972885792435486,0.9980091330822812,0.9977986676291182	Bacteria,Enterobacteriaceae,Escherichia	0.9980409645210939,0.9985910481456639,0.9986706078553413
SRR9214416_k141_100952_extended_circular	SRR9214416_k141_100952_extended_circular	1	66005	circular	Jiricka_pond	1	dsDNA,Siphoviridae,Lambdavirus	0.9979149384570545,0.9984095132858447,0.9983910161394306	Bacteria,Enterobacteriaceae,Escherichia	0.9983203757054343,0.9989714037986487,0.9989677150720105
ERS4600569_NODE_257_length_66125_cov_6.877481_self_circular	ERS4600569_NODE_257_length_66125_cov_6.877481_self_circular	1	65998	circular	Björntjärnan	1	dsDNA,Myoviridae,Pbunavirus	0.9901225814407103,0.9760733420870528,0.9744077892451551	Bacteria,Enterobacteriaceae,Salmonella	0.9941465724772091,0.9592324177532023,0.9640868941018795
ERS4600472_contig-140_118_self_circular	ERS4600473_contig-140_2114_extended_partial,ERS4600472_contig-140_118_self_circular,ERS4600470_contig-140_718_extended_partial	3	65889	circular	Loclat	1	dsDNA,Siphoviridae,Lambdavirus	0.9969270564760218,0.9974889540776517,0.9972724417432128	Bacteria,Enterobacteriaceae,Escherichia	0.9977820750621571,0.9984008703191716,0.9985209699140991
ERS4600460_contig-140_76_self_circular	ERS4600461_contig-140_85_extended_circular,ERS4600460_contig-140_76_self_circular,ERS4600472_contig-140_548_extended_circular,ERS4600468_contig-140_70_self_circular,ERS4600470_contig-140_60_self_circular,ERS4600471_contig-140_108_self_circular,ERS4600469_contig-140_90_self_circular,ERS4600463_contig-140_60_self_circular,ERS4600473_contig-140_54_self_circular	9	65969	circular	Loclat	1	dsDNA,Podoviridae,Lambdavirus	0.9888376342398494,0.9915573371248603,0.9932114105608851	Bacteria,Synechococcaceae,Synechococcus	0.993980820079719,0.9970655356879938,0.9974084443509509
SRR6754094_k141_2260138_extended_circular	SRR6754086_k141_1843192_extended_partial,SRR9214416_k141_1050722_extended_partial,SRR6754094_k141_2260138_extended_circular	3	63895	circular	Rimov,Jiricka_pond	2	dsDNA,Siphoviridae,Lambdavirus	0.9971988991771854,0.9977931799803593,0.9975617282249932	Bacteria,Enterobacteriaceae,Escherichia	0.9979509846481708,0.9984315441621542,0.9985469939038804
SRR9214418_k141_1140687_extended_circular	SRR9214418_k141_1140687_extended_circular	1	65949	circular	Jiricka_pond	1	dsDNA,Siphoviridae,Lambdavirus	0.9970083290361634,0.997775840680205,0.9975920344278464	Bacteria,Enterobacteriaceae,Escherichia	0.9978531118039385,0.9984479035450783,0.9985578372329559
SRR6754098_k141_2312237_self_circular	SRR6754098_k141_2312237_self_circular	1	65926	circular	Rimov	1	dsDNA,Siphoviridae,T4virus	0.987580712059727,0.965351349391627,0.972782274728484	Bacteria,Enterobacteriaceae,Haloarcula	0.99344094084218,0.9796734667168354,0.9765393732122061
SRR6754098_k141_1955140_extended_partial	SRR6754098_k141_1955140_extended_partial,SRR6754096_k141_1855347_extended_partial	2	65924	circular	Rimov	1	dsDNA,Siphoviridae,Lambdavirus	0.9980816873304487,0.9985135490867706,0.9985590778097982	Bacteria,Enterobacteriaceae,Escherichia	0.9984135127668811,0.9989836733358418,0.9990002450592371
SRR6754087_k141_3228291_extended_circular	SRR6754087_k141_3228291_extended_circular	1	65919	circular	Rimov	1	dsDNA,Podoviridae,Cba41virus	0.9891851444970069,0.9900661573115888,0.9915555898413608	Bacteria,Flavobacteriaceae,Cellulophaga	0.9932215162397885,0.9964091154481654,0.996638567986589
ERS4600549_contig-140_112	ERS4600549_contig-140_112	1	65917	circular	Mekkojärvi	1	dsDNA,Siphoviridae,Lambdavirus	0.997885512185279,0.9983102063849608,0.9981871380475091	Bacteria,Enterobacteriaceae,Escherichia	0.9982998539800307,0.9987239681319221,0.998768197817021
ERS4600489_contig-140_273_extended_circular	ERS4600489_contig-140_273_extended_circular	1	65914	circular	Loclat	1	dsDNA,Siphoviridae,Lambdavirus	0.9974202968410196,0.9981368133834176,0.9979832599555877	Bacteria,Enterobacteriaceae,Escherichia	0.9980693792178066,0.9985440149197572,0.9986380778681148
SRR9214416_k141_416457_extended_circular	SRR9214416_k141_416457_extended_circular	1	65903	circular	Jiricka_pond	1	dsDNA,Siphoviridae,Lambdavirus	0.9965697374616057,0.997615058078774,0.997446013632281	Bacteria,Enterobacteriaceae,Escherichia	0.9976273728244998,0.9984090500106336,0.9985361505748048
SRR9302965_k141_498666_extended_partial	SRR9302965_k141_498666_extended_partial	1	65897	high-quality	Dianchi	1	dsDNA,Siphoviridae,Cba41virus	0.9931576911866915,0.9939091767457917,0.9940103922724693	Bacteria,Flavobacteriaceae,Cellulophaga	0.994976913058921,0.9970921196852455,0.9974301310091019
ERR3687821_contig-140_1186_extended_partial	ERR3687821_contig-140_1186_extended_partial,ERR3687822_contig-140_2108_extended_partial	2	65892	circular	Lake_Rotsee	1	dsDNA,Myoviridae,Lambdavirus	0.9972619554738471,0.9982250861842032,0.997977749736887	Bacteria,Enterobacteriaceae,Escherichia	0.9979209913571964,0.9986094524514535,0.9986814511844169
ERR3687829_contig-140_275_extended_circular	ERR3687829_contig-140_275_extended_circular	1	65883	circular	Lake_Rotsee	1	dsDNA,Iridoviridae,Prasinovirus	0.632816178283972,0.7984337883060607,0.7937442487092312	Bacteria,Bacillaceae,Bacillus	0.3747188128971151,0.6926276440852651,0.6506756478346957
SRR6754087_k141_2855619_self_circular	SRR6754087_k141_2855619_self_circular	1	65871	circular	Rimov	1	dsDNA,Podoviridae,Bpp1virus	0.9978224558886174,0.9983527664853397,0.9984929551853913	Bacteria,Flavobacteriaceae,Cellulophaga	0.9982777536603654,0.9989795834901107,0.9989720524036407
SRR6754087_k141_1163293_self_circular	SRR6754087_k141_1163293_self_circular	1	65859	circular	Rimov	1	dsDNA,Siphoviridae,Cp8virus	0.9725691097011412,0.9817921585379502,0.9858277175021076	Bacteria,Synechococcaceae,Synechococcus	0.9826102056119026,0.9908203412567278,0.9911756987983422
SRR6754089_k141_580467_extended_partial	SRR6754089_k141_580467_extended_partial	1	65856	high-quality	Rimov	1	dsDNA,Podoviridae,Bpp1virus	0.9968373764096585,0.9973801893766837,0.9971291760569977	Bacteria,Flavobacteriaceae,Cellulophaga	0.9978310114842732,0.9983088487902236,0.9983756693044872
SRR9302966_k141_1579210_extended_partial	SRR9302966_k141_1579210_extended_partial	1	65856	circular	Dianchi	1	dsDNA,Siphoviridae,Phicbkvirus	0.9713360087886465,0.9455861235157165,0.9353293182206401	Bacteria,Pseudomonadaceae,Pseudomonas	0.9839898969967245,0.9449424967690219,0.9518404382439879
SRR9214415_k141_1373413_self_circular	SRR9214415_k141_1373413_self_circular,SRR9214416_k141_465947_self_circular	2	65831	circular	Jiricka_pond	1	dsDNA,Podoviridae,P12024virus	0.9931534874335807,0.9925567113337548,0.993437329527609	Bacteria,Flavobacteriaceae,Cellulophaga	0.9949469197679467,0.9971984556742519,0.9975233836391514
ERS4600328_contig-140_24_self_circular	ERS4600333_contig-140_616_extended_partial,ERS4600339_contig-140_3255_extended_partial,ERS4600340_contig-140_526_extended_partial,ERS4600338_contig-140_1701_extended_partial,ERS4600336_contig-140_1077_extended_partial,ERS4600328_contig-140_24_self_circular,ERS4600332_contig-140_43_extended_circular,ERS4600341_contig-140_309_extended_circular,ERS4600334_contig-140_602_extended_circular	9	65582	circular	Alinen_Mustajärvi	1	dsDNA,Siphoviridae,Lambdavirus	0.9976851332869986,0.9983622242854238,0.9983111179682722	Bacteria,Enterobacteriaceae,Escherichia	0.9982146098898931,0.9988752924239698,0.9989048237633725
SRR6754102_k141_2054671_extended_circular	SRR6754102_k141_2054671_extended_circular	1	65803	circular	Rimov	1	dsDNA,Myoviridae,Phicbkvirus	0.950562462166222,0.9715020720463684,0.9742369724654372	Bacteria,Enterobacteriaceae,Bacillus	0.9721441256561032,0.9835608650841691,0.9854439150490227
SRR6754099_k141_1799510_extended_partial	SRR6754099_k141_1799510_extended_partial	1	65766	high-quality	Rimov	1	dsDNA,Podoviridae,Cba41virus	0.9947411048584176,0.9963035764671019,0.996600195061742	Bacteria,Flavobacteriaceae,Cellulophaga	0.9970496073246774,0.998065502969228,0.9982498866872112
ERS4600511_contig-140_346_extended_partial	ERS4600511_contig-140_346_extended_partial	1	65765	circular	Mekkojärvi	1	dsDNA,Siphoviridae,Lambdavirus	0.9971806829137053,0.9979602677818464,0.99800530083039	Bacteria,Enterobacteriaceae,Escherichia	0.9979525632424326,0.9986094524514535,0.9986836198502319
SRR6754089_k141_2248186_extended_circular	SRR6754089_k141_2248186_extended_circular,SRR6754087_k141_429390_extended_partial	2	65765	circular	Rimov	1	dsDNA,Siphoviridae,Lambdavirus	0.9965094836670179,0.9974889540776517,0.9972669315245122	Bacteria,Enterobacteriaceae,Escherichia	0.9976352657958089,0.9983272530960132,0.9984515726080159
SRR9214414_k141_1473041_self_circular	SRR9214415_k141_1613549_extended_partial,SRR9214414_k141_1473041_self_circular	2	65610	circular	Jiricka_pond	1	dsDNA,Siphoviridae,Lambdavirus	0.9970027240320157,0.9979303180815798,0.9978923413470281	Bacteria,Enterobacteriaceae,Escherichia	0.9978467974268913,0.9985746887627399,0.9986619331920809
ERS4600336_contig-140_340_self_circular	ERS4600336_contig-140_340_self_circular,ERS4600329_contig-140_277_extended_circular,ERS4600340_contig-140_163_self_circular,ERS4600330_contig-140_46_self_circular,ERS4600339_contig-140_347_self_circular	5	65743	circular	Alinen_Mustajärvi	1	dsDNA,Siphoviridae,Cp8virus	0.9629200950608704,0.9732044760615198,0.981976074630402	Bacteria,Pseudomonadaceae,Pseudomonas	0.9789447097359801,0.991382695044743,0.9907289536404309
ERS4600508_contig-140_78_self_circular	ERS4600508_contig-140_78_self_circular,ERS4600505_contig-140_202_extended_partial,ERS4600507_contig-140_153_extended_partial	3	65741	circular	Mekkojärvi	1	dsDNA,Siphoviridae,Lambdavirus	0.9952749815034864,0.9969939958732466,0.9969996859175341	Bacteria,Enterobacteriaceae,Escherichia	0.9971680018943131,0.9981472998838484,0.9982889226718831
ERS4600569_NODE_2049_length_15899_cov_5.515534_extended_partial	ERS4600569_NODE_2049_length_15899_cov_5.515534_extended_partial	1	65734	high-quality	Björntjärnan	1	dsDNA,Podoviridae,Kpp25virus	0.98038668923615,0.9801244331231075,0.979267802139067	Bacteria,Pseudomonadaceae,Pseudomonas	0.9891203283476064,0.9929470610368577,0.9936197851719644
SRR8894378_k141_31416_self_circular	SRR8894378_k141_31416_self_circular,SRR8894379_k141_2363891_self_circular,SRR8894382_k141_2058029_self_circular,SRR8894381_k141_2760600_self_circular	4	65714	circular	Fuxian	1	dsDNA,Myoviridae,T4virus	0.8742951707284263,0.8585554471411435,0.9113956832946699	Bacteria,Enterobacteriaceae,Pseudomonas	0.9244090137732349,0.884997627889476,0.8708754687028993
ERS4600549_contig-140_1916_extended_partial	ERS4600549_contig-140_1916_extended_partial	1	65695	circular	Mekkojärvi	1	dsDNA,Siphoviridae,Lambdavirus	0.9977215658139587,0.998374834685536,0.9982945873121705	Bacteria,Enterobacteriaceae,Escherichia	0.9982240814554639,0.9988630228867768,0.9989026550975574
SRR6754093_k141_267724_extended_partial	SRR6754093_k141_267724_extended_partial	1	65691	high-quality	Rimov	1	dsDNA,Siphoviridae,Lambdavirus	0.9974343093513889,0.9980816428829267,0.997939178205983	Bacteria,Enterobacteriaceae,Escherichia	0.9980267571727377,0.9985562844569503,0.9986489211971903
ERS4600313_contig-140_871_extended_partial	ERS4600313_contig-140_871_extended_partial	1	65673	high-quality	SAS2	1	dsDNA,Siphoviridae,Lambdavirus	0.9972913817456225,0.9977916036803453,0.9975727486623944	Bacteria,Enterobacteriaceae,Escherichia	0.9979099411973638,0.998503116462447,0.9985643432304012
ERS4600385_contig-140_486_extended_circular	ERS4600386_contig-140_329_extended_partial,ERS4600385_contig-140_486_extended_circular	2	65582	circular	SAS2	1	dsDNA,Siphoviridae,Lambdavirus	0.997263356724884,0.9980989821830809,0.9980466274706443	Bacteria,Enterobacteriaceae,Escherichia	0.997916255574411,0.9986135422971846,0.9986814511844169
SRR6754100_NODE_415_length_65433_cov_6.661608_extended_circular	SRR6754100_NODE_415_length_65433_cov_6.661608_extended_circular,SRR6754098_k141_540622	2	65665	circular	Rimov	1	dsDNA,Siphoviridae,Lambdavirus	0.9976501020110755,0.9979555388818043,0.9978758106909263	Bacteria,Enterobacteriaceae,Escherichia	0.9981577804964679,0.9985767336856054,0.9986619331920809
SRR6754102_k141_867336_extended_circular	SRR6754102_k141_867336_extended_circular	1	65657	circular	Rimov	1	dsDNA,Podoviridae,T4virus	0.9588004170123086,0.9644039930831956,0.9765925909599352	Bacteria,Flavobacteriaceae,Cellulophaga	0.9764284304826552,0.9855117214978651,0.9870010171042672
ERS4600463_contig-140_61_self_circular	ERS4600460_contig-140_933_extended_circular,ERS4600463_contig-140_61_self_circular,ERS4600461_contig-140_2341_extended_circular	3	65588	circular	Loclat	1	dsDNA,Myoviridae,T4virus	0.9728339461471202,0.9703702886362956,0.9780280029314363	Bacteria,Synechococcaceae,Synechococcus	0.9833679308575713,0.9894195690938538,0.9899482339469935
ERS4600481_contig-140_76_self_circular	ERS4600489_contig-140_126_extended_circular,ERS4600482_contig-140_1341_extended_partial,ERS4600481_contig-140_76_self_circular	3	65579	circular	Loclat	1	dsDNA,Siphoviridae,Lambdavirus	0.9968009438826985,0.9979050972813553,0.9977215245673101	Bacteria,Enterobacteriaceae,Escherichia	0.9977899680334662,0.9985174309225056,0.9986055478808882
SRR6754087_k141_461427_extended_partial	SRR6754087_k141_461427_extended_partial	1	65563	high-quality	Rimov	1	dsDNA,Podoviridae,Bpp1virus	0.9967028563101137,0.9969435542727977,0.9965671337495385	Bacteria,Flavobacteriaceae,Cellulophaga	0.9976984095662812,0.9982066026469482,0.9983583199779663
SRR6754102_k141_2326562_self_circular	SRR6754102_k141_2326562_self_circular	1	65560	circular	Rimov	1	dsDNA,Siphoviridae,Lambdavirus	0.9969452727395018,0.9978704186810468,0.9975699935530441	Bacteria,Enterobacteriaceae,Escherichia	0.9978720549350804,0.9984785773880609,0.9985816925569221
SRR9214416_k141_204530_extended_circular	SRR9214416_k141_204530_extended_circular	1	65560	circular	Jiricka_pond	1	dsDNA,Siphoviridae,Lambdavirus	0.9973432280339888,0.998106863683151,0.997977749736887	Bacteria,Enterobacteriaceae,Escherichia	0.9980614862464975,0.9986605755230913,0.9987139811716433
ERS4600458_contig-140_248_self_circular	ERS4600458_contig-140_248_self_circular,ERS4600459_contig-140_167_self_circular	2	65557	circular	Lovojärvi	1	dsDNA,Myoviridae,Bxz1virus	0.9589643633836289,0.9351841197231386,0.9578385616125104	Bacteria,Bacillaceae,Bacillus	0.9749177157741031,0.9797000507140871,0.9822256149794085
ERS4600482_contig-140_178_extended_partial	ERS4600482_contig-140_178_extended_partial,ERS4600481_contig-140_194_extended_partial	2	65538	high-quality	Loclat	1	dsDNA,Podoviridae,Alphabaculovirus	0.9590890747259153,0.9749021511766292,0.9535020194951538	Bacteria,Enterobacteriaceae,Staphylococcus	0.9751971269584435,0.954551589314051,0.9490710519981003
ERR3687830_contig-140_84_self_circular	ERR3687826_contig-140_1599_extended_partial,ERR3687829_contig-140_294_extended_circular,ERR3687828_contig-140_277_extended_circular,ERR3687824_contig-140_206_extended_circular,ERR3687830_contig-140_84_self_circular	5	64680	circular	Lake_Rotsee	1	dsDNA,Siphoviridae,Lambdavirus	0.9973642467995426,0.9981431185834737,0.9979722395181865	Bacteria,Enterobacteriaceae,Escherichia	0.9980693792178066,0.9985460598426228,0.9986489211971903
SRR9214416_k141_230790_extended_circular	SRR9214416_k141_230790_extended_circular	1	65494	circular	Jiricka_pond	1	dsDNA,Podoviridae,Bpp1virus	0.9972409367082932,0.9975835320784935,0.9970878494167433	Bacteria,Flavobacteriaceae,Cellulophaga	0.9979399344883382,0.9985419699968917,0.9986142225441487
DRR125122_contig-140_17_self_circular	DRR125122_contig-140_17_self_circular	1	65488	circular	Biwa	1	dsDNA,Siphoviridae,Cba41virus	0.9850808802098514,0.9885670959982471,0.986191391936346	Bacteria,Flavobacteriaceae,Cellulophaga	0.9912009155846718,0.9923990217089012,0.9931079800395999
ERS4600468_contig-140_75	ERS4600468_contig-140_75,ERS4600469_contig-140_361_extended_partial,ERS4600471_contig-140_148_extended_partial,ERS4600470_contig-140_296_extended_partial	4	65484	high-quality	Loclat	1	dsDNA,Siphoviridae,Lambdavirus	0.9979289509674237,0.9984757178864339,0.9985480573723972	Bacteria,Enterobacteriaceae,Escherichia	0.9983045897628162,0.9989816284129762,0.9989959077276069
SRR9302964_k141_1329274_extended_partial	SRR9302964_k141_1329274_extended_partial	1	65459	high-quality	Xingyun	1	dsDNA,Podoviridae,Bcep22virus	0.9899922650942762,0.9928577846364343,0.9914123241551457	Bacteria,Burkholderiaceae,Pseudomonas	0.9942333951616086,0.9953191715608487,0.9953417058291568
SRR6754102_k141_2691482_extended_partial	SRR6754102_k141_2691482_extended_partial	1	65442	circular	Rimov	1	dsDNA,Siphoviridae,Cba41virus	0.9513513665000112,0.9588207384335046,0.9728952342118459	Bacteria,Flavobacteriaceae,Cellulophaga	0.9715205809226883,0.9789597886367726,0.9805622482992238
SRR8894380_k141_1038610_self_circular	SRR8894380_k141_1038610_self_circular	1	65435	circular	Fuxian	1	dsDNA,Podoviridae,T4virus	0.9756644732417102,0.9744733975728133,0.9613430607060794	Bacteria,Enterobacteriaceae,Synechococcus	0.9864746043648132,0.9688701392183486,0.9728483039948993
ERR2814751_NODE_28_length_65528_cov_21.639134_self_circular	ERR2814751_NODE_28_length_65528_cov_21.639134_self_circular	1	65431	circular	Soyang	1	dsDNA,Siphoviridae,Lambdavirus	0.9974819518866443,0.9983054774849187,0.9981733625007576	Bacteria,Enterobacteriaceae,Escherichia	0.9981577804964679,0.9987178333633255,0.9987465111588699
SRR5338504_k141_2295212_extended_circular	SRR5338504_k141_2295212_extended_circular	1	65421	circular	Tous	1	dsDNA,Podoviridae,Bpp1virus	0.9868870927964487,0.984818654564886,0.9666686870801902	Bacteria,Enterobacteriaceae,Bacillus	0.9921575437073287,0.9735346082745758,0.9771834669592919
ERS4600471_contig-140_1690_extended_partial	ERS4600471_contig-140_1690_extended_partial	1	65418	circular	Loclat	1	dsDNA,Siphoviridae,Lambdavirus	0.9972045041813331,0.9982440017843717,0.9980466274706443	Bacteria,Enterobacteriaceae,Escherichia	0.9980235999842141,0.9986626204459568,0.9987183185032736
SRR7054680_k141_1680729_extended_partial	SRR7054680_k141_1680729_extended_partial	1	65408	circular	Zurich	1	dsDNA,Siphoviridae,T4virus	0.962360995897137,0.9753624307807256,0.9782236156953069	Bacteria,Enterobacteriaceae,Bacillus	0.9785863688385493,0.9807368266069004,0.9822386269742991
ERS4600570_NODE_4568_length_10952_cov_43.076952_extended_circular	ERS4600570_NODE_4568_length_10952_cov_43.076952_extended_circular	1	65407	circular	Björntjärnan	1	dsDNA,Myoviridae,N4virus	0.9503718920252001,0.945720109016909,0.9710575762752024	Bacteria,Enterobacteriaceae,Achromobacter	0.9604183274793796,0.972391496392756,0.9754745582969901
ERS4600470_contig-140_320_extended_partial	ERS4600470_contig-140_320_extended_partial,ERS4600472_contig-140_2127_extended_partial	2	65403	high-quality	Loclat	1	dsDNA,Siphoviridae,Lambdavirus	0.9969186489698002,0.9978924868812431,0.9976085650839481	Bacteria,Enterobacteriaceae,Escherichia	0.9978452188326296,0.9985010715395816,0.9985925358859976
SRR6754102_k141_654574_extended_partial	SRR6754102_k141_654574_extended_partial	1	65397	circular	Rimov	1	dsDNA,Siphoviridae,Lambdavirus	0.9976501020110755,0.9983054774849187,0.9983221384056733	Bacteria,Enterobacteriaceae,Escherichia	0.998140415959588,0.9987975853550805,0.9988115711333231
SRR6754097_k141_1085218_extended_partial	SRR6754097_k141_1085218_extended_partial	1	65380	high-quality	Rimov	1	dsDNA,Siphoviridae,Lambdavirus	0.9973838643140596,0.9982912907847925,0.9980356070332431	Bacteria,Enterobacteriaceae,Escherichia	0.9980283357669995,0.998503116462447,0.9985925358859976
SRR9302958_k141_545069_self_circular	SRR9302958_k141_545069_self_circular	1	65353	circular	Lugu	1	dsDNA,Siphoviridae,Betabaculovirus	0.9172897562944197,0.8797330378296241,0.9212672400967594	Bacteria,Enterobacteriaceae,Synechococcus	0.9484952050199298,0.9379427258003828,0.9452281761737361
SRR5896115_k141_58884_extended_circular	SRR5896115_k141_58884_extended_circular	1	65343	circular	Baikal	1	dsDNA,Podoviridae,Bpp1virus	0.9969172477187633,0.9975835320784935,0.9974019318826765	Bacteria,Flavobacteriaceae,Cellulophaga	0.9978625833695095,0.9985767336856054,0.9986489211971903
SRR8894380_k141_1086762_extended_partial	SRR8894380_k141_1086762_extended_partial	1	65336	circular	Fuxian	1	dsDNA,Myoviridae,Cp8virus	0.9469108019639935,0.9496829272521781,0.9707434938092693	Bacteria,Flavobacteriaceae,Bacillus	0.9431058842101109,0.9720090958169058,0.971525417847686
ERS4600483_contig-140_91_self_circular	ERS4600483_contig-140_91_self_circular	1	65307	circular	Loclat	1	dsDNA,Siphoviridae,Lambdavirus	0.9970867990942314,0.9977080597796018,0.9975314220221401	Bacteria,Enterobacteriaceae,Escherichia	0.9979067840088401,0.9984274543164232,0.9985621745645861
ERS4600401_contig-140_352_extended_partial	ERS4600401_contig-140_352_extended_partial	1	65296	circular	SAS2	1	dsDNA,Siphoviridae,Lambdavirus	0.9976108669820416,0.9982282387842313,0.9980631581267461	Bacteria,Enterobacteriaceae,Escherichia	0.9981577804964679,0.9986053626057225,0.9986749451869715
ERS4600472_contig-140_123_self_circular	ERS4600472_contig-140_123_self_circular	1	65230	circular	Loclat	1	dsDNA,Siphoviridae,Lambdavirus	0.9972675604779948,0.9980721850828425,0.9979061168937795	Bacteria,Enterobacteriaceae,Escherichia	0.9980141284186432,0.998603317682857,0.9986792825186017
ERS4600570_NODE_185_length_52162_cov_4.926492_extended_partial	ERS4600570_NODE_185_length_52162_cov_4.926492_extended_partial	1	65217	circular	Björntjärnan	1	dsDNA,Siphoviridae,Lambdavirus	0.9976571082662601,0.9984300051860271,0.9983965263581311	Bacteria,Enterobacteriaceae,Escherichia	0.9981577804964679,0.9988752924239698,0.9989243417557084
SRR6754098_k141_2237065_extended_circular	SRR6754098_k141_2237065_extended_circular	1	65190	circular	Rimov	1	dsDNA,Siphoviridae,Phic31virus	0.966891240499518,0.9675723561113939,0.9785514737079914	Bacteria,Streptomycetaceae,Streptomyces	0.981967717747346,0.9751255582639423,0.9792415308178256
SRR6754096_k141_1319841_extended_partial	SRR6754096_k141_1319841_extended_partial	1	65172	circular	Rimov	1	dsDNA,Siphoviridae,Lambdavirus	0.9970405578100128,0.9979350469816219,0.9978923413470281	Bacteria,Enterobacteriaceae,Escherichia	0.9978957338490074,0.9984785773880609,0.9985838612227371
SRR6754102_k141_2170809	SRR6754102_k141_2170809	1	65107	high-quality	Rimov	1	dsDNA,Siphoviridae,T4virus	0.9706928345626976,0.9754128723811746,0.9687680804051113	Bacteria,Streptomycetaceae,Streptomyces	0.9818966810055646,0.9830169156019435,0.9846762073504759
ERS4600468_contig-140_77_self_circular	ERS4600468_contig-140_77_self_circular,ERS4600469_contig-140_95_self_circular,ERS4600472_contig-140_126_self_circular	3	65103	circular	Loclat	1	dsDNA,Siphoviridae,Lambdavirus	0.9969326614801695,0.9979287417815658,0.9977738716449656	Bacteria,Enterobacteriaceae,Escherichia	0.9978562689924622,0.9983845109362475,0.9985253072457294
SRR9214418_k141_1322196_self_circular	SRR9214418_k141_1322196_self_circular	1	65089	circular	Jiricka_pond	1	dsDNA,Siphoviridae,Bcep22virus	0.9923659843508285,0.9884756705974335,0.986629454323042	Bacteria,Enterobacteriaceae,Pseudomonas	0.9958277753660365,0.9940022412354605,0.9939927956921623
SRR6754087_k141_407580_extended_partial	SRR6754087_k141_407580_extended_partial	1	65082	high-quality	Rimov	1	dsDNA,Podoviridae,T4virus	0.9614459789700245,0.8989702032008348,0.9306621629812487	Bacteria,Synechococcaceae,Synechococcus	0.9780764828919847,0.9401287483436125,0.9514695963896052
SRR9214415_k141_1481398_extended_partial	SRR9214415_k141_1481398_extended_partial	1	65073	circular	Jiricka_pond	1	dsDNA,Siphoviridae,Lambdavirus	0.9974034818285765,0.9980832191829406,0.997873055581576	Bacteria,Enterobacteriaceae,Escherichia	0.9980599076522357,0.99871578844046,0.9987486798246851
ERS4600458_contig-140_257_self_circular	ERS4600458_contig-140_257_self_circular	1	65070	circular	Lovojärvi	1	dsDNA,Myoviridae,Lambdavirus	0.9965921574781965,0.9976450077790405,0.9976223406306997	Bacteria,Enterobacteriaceae,Escherichia	0.9977205098859465,0.998499026616716,0.9985881985543673
[truncated: 6,205 more rows]

## Sheet: ST5
Supplementary Table 5 | The information of genomes encoded cysC/cysH gene.
[truncated: 230 more rows]

## Sheet: ST6
Supplementary Table 6 | The distribution of cysC/cysH encoding phages.
[truncated: 158 more rows]
[truncated: 179 more columns]
